# Supplementary material for: Evolution at two levels of gene expression in yeast
Source: HighWire-hosted journal article supplement (doi:10.1101/gr.165522.113), 2013-12-06
Supplement: Supplemental_Table_S1.xlsx [file Supplemental_Table_S1.xlsx]

## Sheet: HEADER LEGEND
Supplemental Table S1. Summary of mapping data and results of tests for regulatory divergence.
SCER_GENE	S. cerevisiae gene name according to the annotation of Scanell et al. 2011
SPAR_GENE	S. paradoxus gene name according to the annotation of Scanell et al. 2011
SGD	Saccharomyces Genome Database gene identifier ('NA' indicates that the gene is present in the Scannell et al. (2011) annotation, but absent from the SGD)
SGD_SYSTEMATIC_ID	SGD systematic ID
STANDARD_NAME	Standard three letter designation
SCER_MAPPABLE_BASES	Number of unmasked bases in the Scer ortholog
SPAR_MAPPABLE_BASES	Number of unmasked bases in the Spar ortholog
HYBRID_SCER_MRNA_REP1_TOTCOV	The total base level coverage of the Scer allele in replicate 1 of the mRNA fraction
HYBRID_SCER_MRNA_REP2_TOTCOV	as above, replicate 2
HYBRID_SPAR_MRNA_REP1_TOTCOV	The total base level coverage of the Spar allele in replicate 1 of the mRNA fraction (Note that all total coverage Spar samples are scaled such that the total number of bases covered are the same between species)
HYBRID_SPAR_MRNA_REP2_TOTCOV	as above, replicate 2
HYBRID_MRNA_REP1_RAT	The started (coverage + 1) Log2 Sc/Sp ratio for mRNA fraction replicate 1
HYBRID_MRNA_REP2_RAT	as above, replicate 2
PARENTAL_SCER_MRNA_REP1_TOTCOV	The total base level coverage of the Scer allele in replicate 1 of the mRNA fraction
PARENTAL_SCER_MRNA_REP2_TOTCOV	as above, replicate 2
PARENTAL_SPAR_MRNA_REP1_TOTCOV	The total base level coverage of the Spar allele in replicate 1 of the mRNA fraction (Note that all total coverage Spar samples are scaled such that the total number of bases covered are the same between species)
PARENTAL_SPAR_MRNA_REP2_TOTCOV	as above, replicate 2
PARENTAL_MRNA_REP1_RAT	The started (coverage + 1) Log2 Sc/Sp ratio for mRNA fraction replicate 1
PARENTAL_MRNA_REP2_RAT	as above, replicate 2
HYBRID_SCER_RIBO_REP1_TOTCOV	The total base level coverage of the Scer allele in replicate 1 of the Ribo fraction
HYBRID_SCER_RIBO_REP2_TOTCOV	as above, replicate 2
HYBRID_SPAR_RIBO_REP1_TOTCOV	The total base level coverage of the Spar allele in replicate 1 of the Ribo fraction
HYBRID_SPAR_RIBO_REP2_TOTCOV	as above, replicate 2
HYBRID_RIBO_REP1_RAT	The started (coverage + 1) Log2 Sc/Sp ratio for Ribo fraction replicate 1
HYBRID_RIBO_REP2_RAT	as above, replicate 2
PARENTAL_SCER_RIBO_REP1_TOTCOV	The total base level coverage of the Scer allele in replicate 1 of the Ribo fraction
PARENTAL_SCER_RIBO_REP2_TOTCOV	as above, replicate 2
PARENTAL_SPAR_RIBO_REP1_TOTCOV	The total base level coverage of the Spar allele in replicate 1 of the Ribo fraction
PARENTAL_SPAR_RIBO_REP2_TOTCOV	as above, replicate 2
PARENTAL_RIBO_REP1_RAT	The started (coverage + 1) Log2 Sc/Sp ratio for Ribo fraction replicate 1
PARENTAL_RIBO_REP2_RAT	as above, replicate 2
MRNA_CIS_TEST	≥ than 100 reads mapping to both orthologs in both replicates in the hybrid mRNA fraction (minimum to test for significant differences) (1 = yes, 0 = no)
TRANSL_CIS_TEST	≥ than 100 reads mapping to both orthologs in both replicates in the hybrid mRNA and Ribo fractions (minimum to test for significant differences) (1 = yes, 0 = no)
PARENTAL_TEST	≥ than 100 reads mapping to both orthologs in both replicates in all hybrid and parental mRNA fractions, and no orthologs differentially expressed due to mating type or ploidy state(1 = yes, 0 = no)
MRNA_CIS_MAX_P	Max p value (2 tailed) obtained from the permutation approach testing for significant mRNA divergence in cis
MRNA_CIS_DIR	Species with higher expression level
MRNA_CIS_NO_TEST	Failed to test because: LOW_COV, < 100 reads in appropriate samples; REPS_DISAGREE, replicates disagree in direction
TRANSL_CIS_MAX_P	Max p value (2 tailed) obtained from the permutation approach testing for significant translational divergence in cis
TRANSL_CIS_DIR	Species with higher expression level
TRANSL_CIS_NO_TEST	Failed to test because: LOW_COV, < 100 reads in appropriate samples; REPS_DISAGREE, replicates disagree in direction
MRNA_TRANS_MAX_P	Max p value (2 tailed) obtained from the permutation approach testing for significant mRNA divergence in trans
MRNA_TRANS_DIR	Species with higher expression level
MRNA_TRANS_NO_TEST	Failed to test because: LOW_COV, < 100 reads in appropriate samples; REPS_DISAGREE, replicates disagree in direction
TRANSL_TRANS_MAX_P	Max p value (2 tailed) obtained from the permutation approach testing for significant translational divergence in trans
TRANSL_TRANS_DIR	Species with higher expression level
TRANSL_TRANS_NO_TEST	Failed to test because: LOW_COV, < 100 reads in appropriate samples; REPS_DISAGREE, replicates disagree in direction
MRNA_CIS_FDR_ADJ_P	FDR adjusted pvalue for the mRNA cis test
TRANSL_CIS_FDR_ADJ_P	FDR adjusted pvalue for the translational cis test
MRNA_TRANS_FDR_ADJ_P	FDR adjusted pvalue for the mRNA trans test
TRANSL_TRANS_FDR_ADJ_P	FDR adjusted pvalue for the translational trans test
MRNA_CIS_SCER	Significant mRNA divergence in cis where Scer is the more highly expressed allele? (1 = yes, 0 = no)
MRNA_CIS_SPAR	Significant mRNA divergence in cis where Spar is the more highly expressed allele? (1 = yes, 0 = no)
TRANSL_CIS_SCER	Significant translational divergence in cis where Scer is the more highly translated allele? (1 = yes, 0 = no)
TRANSL_CIS_SPAR	Significant translational divergence in cis where Spar is the more highly translated allele? (1 = yes, 0 = no)
MRNA_TRANS_SCER	Significant mRNA divergence in trans where Scer is the more highly expressed allele? (1 = yes, 0 = no)
MRNA_TRANS_SPAR	Significant mRNA divergence in trans where Spar is the more highly expressed allele? (1 = yes, 0 = no)
TRANSL_TRANS_SCER	Significant translational divergence in trans where Scer is the more highly translated allele? (1 = yes, 0 = no)
TRANSL_TRANS_SPAR	Significant translational divergence in trans where Spar is the more highly translated allele? (1 = yes, 0 = no)
HYBRID_SCER_MRNA_REP1_RPKM	Reads per Kilobase per Million Mapped Reads mapping to the Scer allele in the hybrid mRNA fraction, replicate 1
HYBRID_SCER_MRNA_REP2_RPKM	as above, replicate 2
HYBRID_SPAR_MRNA_REP1_RPKM	Reads per Kilobase per Million Mapped Reads mapping to the Spar allele in the hybrid mRNA fraction, replicate 1
HYBRID_SPAR_MRNA_REP2_RPKM	as above, replicate 2
HYBRID_SCER_RIBO_REP1_RPKM	Reads per Kilobase per Million Mapped Reads mapping to the Scer allele in the hybrid Ribo fraction, replicate 1
HYBRID_SCER_RIBO_REP2_RPKM	as above, replicate 2
HYBRID_SPAR_RIBO_REP1_RPKM	Reads per Kilobase per Million Mapped Reads mapping to the Spar allele in the hybrid Ribo fraction, replicate 1
HYBRID_SPAR_RIBO_REP2_RPKM	as above, replicate 2
PARENTAL_SCER_MRNA_REP1_RPKM	Reads per Kilobase per Million Mapped Reads mapping to the Scer allele in the parental mRNA fraction, replicate 1
PARENTAL_SCER_MRNA_REP2_RPKM	as above, replicate 2
PARENTAL_SPAR_MRNA_REP1_RPKM	Reads per Kilobase per Million Mapped Reads mapping to the Spar allele in the parental mRNA fraction, replicate 1
PARENTAL_SPAR_MRNA_REP2_RPKM	as above, replicate 2
PARENTAL_SCER_RIBO_REP1_RPKM	Reads per Kilobase per Million Mapped Reads mapping to the Scer allele in the parental Ribo fraction, replicate 1
PARENTAL_SCER_RIBO_REP2_RPKM	as above, replicate 2
PARENTAL_SPAR_RIBO_REP1_RPKM	Reads per Kilobase per Million Mapped Reads mapping to the Spar allele in the parental Ribo fraction, replicate 1
PARENTAL_SPAR_RIBO_REP2_RPKM	as above, replicate 2
AFFECTED_BY_PLOIDY	Gene differentially expressed in different ploidy states according to Wu et al. (2010) (1 = yes, 0 = no)
AFFTECTED_BY_MATING_TYPE	Gene differentially expressed in different mating types according to Galitski et al. (1999) (1 = yes, 0 = no)
TATA	TATA containing promoter according to Tirosh et al. (2006) (1 = yes, 0 = no)
TIROSH_2008_OPN	OPN, DPN, or NA promoter according to Tirosh et al. (2008) (1 = yes, 0 = no)
CDS_PDIV	Percent divergence in CDS
PROMOTER_PDIV	Percent divergence in Promoter (200 bp upstream of TSS)
FIVE_UTR_PDIV	Percent divergence in 5 prime UTR
THREE_UTR_PDIV	Percent divergence in 3 prime UTR
FIVE_UTR_50BP_PDIV	Percent divergence in first 50 bp of 5 prime UTR
KA	Non-synonymous substitutions per non-synonymous site between S. cerevisiae and S. paradoxus
KS	Synonymous substitutions per synonymous site between S. cerevisiae and S. paradoxus
OMEGA	KA/KS

## Sheet: DATA
SCER_GENE	SPAR_GENE	SGD	SGD_SYSTEMATIC_ID	STANDARD_NAME	SCER_MAPPABLE_BASES	SPAR_MAPPABLE_BASES	HYBRID_SCER_MRNA_REP1_TOTCOV	HYBRID_SCER_MRNA_REP2_TOTCOV	HYBRID_SPAR_MRNA_REP1_TOTCOV	HYBRID_SPAR_MRNA_REP2_TOTCOV	HYBRID_MRNA_REP1_RAT	HYBRID_MRNA_REP2_RAT	PARENTAL_SCER_MRNA_REP1_TOTCOV	PARENTAL_SCER_MRNA_REP2_TOTCOV	PARENTAL_SPAR_MRNA_REP1_TOTCOV	PARENTAL_SPAR_MRNA_REP2_TOTCOV	PARENTAL_MRNA_REP1_RAT	PARENTAL_MRNA_REP2_RAT	HYBRID_SCER_RIBO_REP1_TOTCOV	HYBRID_SCER_RIBO_REP2_TOTCOV	HYBRID_SPAR_RIBO_REP1_TOTCOV	HYBRID_SPAR_RIBO_REP2_TOTCOV	HYBRID_RIBO_REP1_RAT	HYBRID_RIBO_REP2_RAT	PARENTAL_SCER_RIBO_REP1_TOTCOV	PARENTAL_SCER_RIBO_REP2_TOTCOV	PARENTAL_SPAR_RIBO_REP1_TOTCOV	PARENTAL_SPAR_RIBO_REP2_TOTCOV	PARENTAL_RIBO_REP1_RAT	PARENTAL_RIBO_REP2_RAT	MRNA_CIS_TEST	TRANSL_CIS_TEST	PARENTAL_TEST	MRNA_CIS_MAX_P	MRNA_CIS_DIR	MRNA_CIS_NO_TEST	TRANSL_CIS_MAX_P	TRANSL_CIS_DIR	TRANSL_CIS_NO_TEST	MRNA_TRANS_MAX_P	MRNA_TRANS_DIR	MRNA_TRANS_NO_TEST	TRANSL_TRANS_MAX_P	TRANSL_TRANS_DIR	TRANSL_TRANS_NO_TEST	MRNA_CIS_FDR_ADJ_P	TRANSL_CIS_FDR_ADJ_P	MRNA_TRANS_FDR_ADJ_P	TRANSL_TRANS_FDR_ADJ_P
Scer_1.103	Spar_1.85	YAR015W	S000000070	ADE1	360	360	35762	40462	47396.3	45237.6	-0.406336	-0.160951	47755	75438	28934.2	47029.2	0.722856	0.681722	18897	14059	17391.5	11859.9	0.119767	0.245388	37155	32359	28083.7	27035.9	0.403811	0.259284	1	1	1	0.0028	SPAR	NA	0.0002	SCER	NA	0.0002	SCER	NA	0.4066	SPAR	NA	0.00409033	0.000685507	0.000243994	0.568438
Scer_1.104	Spar_1.86	YAR018C	S000000071	KIN3	954	954	15799	13767	17607.8	20706.3	-0.156376	-0.588819	10195	13827	17440	28703.3	-0.774482	-1.05367	2342	1144	3757.66	1405.12	-0.68186	-0.296372	2105	2168	4052.5	5827.3	-0.944663	-1.42604	1	0	0	0.0002	SPAR	NA	NA	NA	LOW_COV	0.0002	SPAR	NA	NA	NA	LOW_COV	0.000334064	NA	0.000243994	NA
Scer_1.105	Spar_1.87	YAR019C	S000000072	CDC15	2510	2510	13859	14691	10806.9	12163.9	0.35884	0.272302	6823	9550	8556.32	8588.4	-0.326542	0.153094	2442	2060	2263.07	2597.56	0.109738	-0.334366	3471	2478	3706.79	3619.91	-0.0947928	-0.546593	1	1	1	0.0002	SCER	NA	0.0062	SPAR	NA	0.0002	SPAR	NA	NA	NA	REPS_DISAGREE	0.000334064	0.013807	0.000243994	NA
Scer_1.26	Spar_1.6	NA	NA	NA	1032	1021	1053	860	2545.02	2571.54	-1.28783	-1.59457	3116	4852	1204.76	2075.82	1.35475	1.20904	218	0	789.652	481.813	-1.86757	-8.93078	438	1189	298.763	578.017	0.53494	1.02382	1	0	0	0.0002	SPAR	NA	NA	NA	LOW_COV	0.0002	SCER	NA	NA	NA	LOW_COV	0.000334064	NA	0.000243994	NA
Scer_1.27	Spar_1.7	YAL061W	S000000057	BDH2	1045	1045	31915	42252	3238.3	6658.6	3.30052	2.66555	44684	76161	2100.32	2055.2	4.41042	5.21102	3358	3285	606.106	746.911	2.46801	2.13539	7573	14931	804.525	556.331	3.23305	4.74373	1	1	1	0.0002	SCER	NA	0.063	SPAR	NA	0.0002	SCER	NA	0.0002	SPAR	NA	0.000334064	0.105446	0.000243994	0.000633882
Scer_1.28	Spar_1.9	YAL060W	S000000056	BDH1	898	898	37917	39807	62871.7	52394.4	-0.729551	-0.396383	42022	72618	46436.6	61491.2	-0.144114	0.239943	10992	7936	30824.7	21253.2	-1.48755	-1.42108	23820	29512	35281.7	30707.1	-0.566728	-0.0572671	1	1	1	0.0002	SPAR	NA	0.0002	SPAR	NA	0.0002	SCER	NA	0.0002	SCER	NA	0.000334064	0.000685507	0.000243994	0.000633882
Scer_1.29	Spar_1.10	YAL059W	S000000055	ECM1	453	381	27709	21321	12743	11368	0.870874	0.657523	9648	13894	10392.5	17264.4	-0.356947	-0.563038	13531	9480	9430.45	5720.27	0.271104	0.478984	8772	10032	6984.64	9063.53	0.0789572	-0.103271	1	1	1	0.0002	SCER	NA	0.1038	SPAR	NA	0.0002	SPAR	NA	NA	NA	REPS_DISAGREE	0.000334064	0.163114	0.000243994	NA
Scer_1.30	Spar_1.11	YAL058W	S000000054	CNE1	1391	1388	16110	11537	17461.1	20232.9	-0.119292	-0.813493	12582	17048	13351.1	18881.6	-0.0887075	-0.150485	5062	2149	5759.52	4186.13	-0.189322	-0.964739	7517	6009	6233.47	7269.42	0.266967	-0.277789	1	1	1	0.0006	SPAR	NA	0.2336	SPAR	NA	NA	NA	REPS_DISAGREE	0.0002	SCER	NA	0.000945863	0.323078	NA	0.000633882
Scer_1.32	Spar_1.14	YAL055W	S000000051	PEX22	498	498	5431	4782	4717.11	5289.96	0.203273	-0.145614	8167	11361	4660.55	7994.08	0.809173	0.507032	2298	784	1314.07	2073.41	0.805866	-1.40194	3683	4070	1508.75	1941.74	1.28696	1.06729	1	0	0	NA	NA	REPS_DISAGREE	NA	NA	LOW_COV	0.0002	SCER	NA	NA	NA	LOW_COV	NA	NA	0.000243994	NA
Scer_1.33	Spar_1.15	NA	NA	NA	1459	1459	1828	1669	190.43	332.483	3.25617	2.32416	1607	3000	215.662	330.653	2.89175	3.17769	0	302	60.5098	0	-5.94274	8.24317	223	303	128.041	123.444	0.795668	1.28858	0	0	0	NA	NA	NA	NA	NA	NA	NA	NA	NA	NA	NA	NA	NA	NA	NA	NA
Scer_1.34	Spar_1.16	YAL053W	S000000049	FLC2	1689	1689	34824	26893	34849.7	26477.6	-0.0010646	0.0224578	17028	27458	32933	30895.1	-0.951586	-0.170144	19298	10677	17350.2	11504	0.153493	-0.107625	22415	19905	25260.4	27314	-0.172405	-0.456492	1	1	1	NA	NA	REPS_DISAGREE	NA	NA	REPS_DISAGREE	0.0002	SPAR	NA	0.4018	SCER	NA	NA	NA	0.000243994	0.562896
Scer_1.35	Spar_1.17	NA	NA	NA	2562	2562	24646	33367	22946.8	24170.1	0.103054	0.465185	15553	18202	14691	18992.4	0.0822555	-0.0613213	7741	4822	4721.78	3189.24	0.71307	0.596266	7340	8595	5676.49	5287.65	0.370723	0.700766	1	1	1	0.0002	SCER	NA	0.1934	SCER	NA	0.0002	SPAR	NA	NA	NA	REPS_DISAGREE	0.000334064	0.275703	0.000243994	NA
Scer_1.36	Spar_1.18	YAL049C	S000000047	AIM2	606	606	26438	25962	43430	39488.1	-0.716057	-0.604998	17619	32021	30329.5	47608.9	-0.783556	-0.5722	12533	5942	18688.4	11100.9	-0.576377	-0.901537	14731	15022	20343.6	21120.6	-0.465693	-0.491544	1	1	1	0.0002	SPAR	NA	NA	NA	REPS_DISAGREE	NA	NA	REPS_DISAGREE	0.0002	SCER	NA	0.000334064	NA	NA	0.000633882
Scer_1.37	Spar_1.19	YAL048C	S000000046	GEM1	1599	1599	8131	11852	7191.71	8476.84	0.177074	0.483484	4279	5720	3629.01	3559.03	0.237637	0.684376	1799	2641	2693.69	1719.61	-0.582124	0.618711	3037	2857	2439.18	1491.33	0.316132	0.937435	1	1	1	0.0002	SCER	NA	NA	NA	REPS_DISAGREE	NA	NA	REPS_DISAGREE	NA	NA	REPS_DISAGREE	0.000334064	NA	NA	NA
Scer_1.38	Spar_1.20	YAL047C	S000000045	SPC72	1626	1626	9105	8760	12063.6	11817.6	-0.405885	-0.431886	7346	10040	6782.52	10042.4	0.11512	-0.000347396	2667	1596	2427.45	1923.22	0.135723	-0.26891	2643	2336	1916.35	2125.24	0.463609	0.136356	1	1	1	0.0002	SPAR	NA	0.298	SCER	NA	0.0002	SCER	NA	0.2096	SCER	NA	0.000334064	0.394167	0.000243994	0.332938
Scer_1.39	Spar_1.21	YAL046C	S000000044	AIM1	230	230	11655	8616	7243.29	6105.79	0.686157	0.496772	8373	14503	4489.06	7219.41	0.899182	1.0063	10026	6341	4907.34	3121.7	1.03058	1.02214	8935	11076	5599.67	3250.41	0.674031	1.76843	1	1	1	0.0002	SCER	NA	0.0036	SCER	NA	0.0002	SCER	NA	0.8336	SPAR	NA	0.000334064	0.00852252	0.000243994	0.943806
Scer_1.40	Spar_1.22	YAL044W-A	S000007586	NA	209	209	7394	6314	6221.71	3655.33	0.249007	0.788385	6212	12866	3930.42	5597.92	0.660241	1.20046	5505	3766	3303.83	3252.74	0.736427	0.211316	6696	8730	2784.89	2351.27	1.26537	1.89209	1	1	1	0.0004	SCER	NA	NA	NA	REPS_DISAGREE	NA	NA	REPS_DISAGREE	NA	NA	REPS_DISAGREE	0.000643008	NA	NA	NA
Scer_1.41	Spar_1.23	YAL044C	S000000042	GCV3	393	393	48110	44542	45428.5	35777.2	0.0827374	0.316118	76885	144253	14626	21493.3	2.39408	2.74658	58353	47270	41320.1	36772	0.497953	0.362308	105474	178518	28461.4	20601.4	1.88977	3.1152	1	1	1	0.0986	SCER	NA	0.7	SCER	NA	0.0002	SCER	NA	NA	NA	REPS_DISAGREE	0.119699	0.773237	0.000243994	NA
Scer_1.42	Spar_1.24	YAL043C	S000000041	PTA1	1885	1885	36011	36850	46002.8	50474	-0.353274	-0.453864	21525	28803	31866.9	35629	-0.566022	-0.306823	12988	9265	19604.2	13158.1	-0.593943	-0.506046	19571	16303	25571.9	24824.7	-0.385827	-0.60661	1	1	1	0.0002	SPAR	NA	0.4184	SPAR	NA	NA	NA	REPS_DISAGREE	0.0002	SCER	NA	0.000334064	0.518862	NA	0.000633882
Scer_1.44	Spar_1.26	YAL041W	S000000039	CDC24	1843	1843	32048	36190	39142.3	41449.3	-0.288487	-0.195751	18653	22524	27046.1	30265.5	-0.535988	-0.426196	10284	9713	13092.3	8194.85	-0.348287	0.245171	11980	11135	14430.2	16573.2	-0.268446	-0.573705	1	1	1	0.0002	SPAR	NA	NA	NA	REPS_DISAGREE	0.0002	SPAR	NA	NA	NA	REPS_DISAGREE	0.000334064	NA	0.000243994	NA
Scer_1.45	Spar_1.27	YAL040C	S000000038	CLN3	799	796	28040	28839	30839.8	34438.3	-0.142728	-0.261413	6597	9114	52006.6	44003.5	-2.98405	-2.27676	3800	1474	6631.87	3745.64	-0.808681	-1.35031	4744	3461	46244.2	33351.5	-3.29025	-3.27355	1	1	1	0.0002	SPAR	NA	0.0002	SPAR	NA	0.0002	SPAR	NA	0.0002	SCER	NA	0.000334064	0.000685507	0.000243994	0.000633882
Scer_1.46	Spar_1.28	YAL039C	S000000037	CYC3	432	435	13159	13400	11694.6	9173.57	0.180179	0.556613	6404	11262	17708.5	22544.6	-1.45727	-0.991268	10710	6971	8040.74	7904.56	0.423498	-0.17131	5314	9166	22964.2	14983	-2.10132	-0.698916	1	1	1	0.0004	SCER	NA	NA	NA	REPS_DISAGREE	0.0002	SPAR	NA	NA	NA	REPS_DISAGREE	0.000643008	NA	0.000243994	NA
Scer_1.47	Spar_1.29	NA	NA	NA	173	173	363804	388579	283306	355079	0.360802	0.130066	274432	440563	246152	356267	0.156901	0.30639	315046	233683	236291	171289	0.414999	0.448122	601575	549342	532101	497074	0.177046	0.144245	1	1	1	0.0862	SCER	NA	0.7968	SCER	NA	NA	NA	REPS_DISAGREE	0.0058	SPAR	NA	0.105449	0.854874	NA	0.0138276
Scer_1.48	Spar_1.30	YAL037W	S000000035	NA	715	709	1705	1998	969.012	0	0.802386	10.9529	2531	3965	386.286	485.245	2.69665	3.01577	157	183	144.215	270.138	0.109577	-0.571478	501	193	0	96.3362	8.95939	0.98285	0	0	0	NA	NA	NA	NA	NA	NA	NA	NA	NA	NA	NA	NA	NA	NA	NA	NA
Scer_1.49	Spar_1.31	YAL036C	S000000034	RBG1	708	708	61179	62771	52761.1	49287	0.213559	0.348886	30618	41809	30862.2	49274.2	-0.0114592	-0.237015	34983	21073	30730.9	24321.5	0.186959	-0.206826	27910	28721	26562.1	26090.4	0.0714086	0.13858	1	1	1	0.0002	SCER	NA	0.7132	SPAR	NA	0.0002	SPAR	NA	0.7474	SCER	NA	0.000334064	0.784155	0.000243994	0.882338
Scer_1.50	Spar_1.32	YAL035W	S000000033	FUN12	2095	2067	364433	326472	356354	349038	0.0129293	-0.115837	114581	126858	136622	202045	-0.273235	-0.690868	232653	159295	223742	159849	0.0369321	-0.0244208	206285	227559	235758	246758	-0.212078	-0.13627	1	1	1	NA	NA	REPS_DISAGREE	0.5176	SCER	NA	0.0002	SPAR	NA	0.011	SCER	NA	NA	0.612675	0.000243994	0.0249025
Scer_1.52	Spar_1.34	YAL034W-A	S000000032	MTW1	835	835	8754	9098	7168.9	6695.32	0.288154	0.442339	6336	9936	4457.01	9227.38	0.507399	0.106733	2189	3196	4228.62	2480.63	-0.949599	0.36543	2535	4520	2682.46	3021.04	-0.0815405	0.58112	1	1	1	0.0002	SCER	NA	0.7456	SPAR	NA	NA	NA	REPS_DISAGREE	NA	NA	REPS_DISAGREE	0.000334064	0.812601	NA	NA
Scer_1.53	Spar_1.35	YAL034C	S000002134	FUN19	924	915	7514	6676	7255.19	7530.01	0.0364398	-0.187764	5235	7920	4496.85	5268.13	0.205107	0.573998	98	308	533.494	190.508	-2.4468	0.676084	479	698	983.783	514.627	-1.05089	0.424843	1	0	0	NA	NA	REPS_DISAGREE	NA	NA	LOW_COV	0.0002	SCER	NA	NA	NA	LOW_COV	NA	NA	0.000243994	NA
Scer_1.54	Spar_1.36	YAL033W	S000000031	POP5	345	339	8962	8585	8940.3	9603.31	-0.0218137	-0.187007	6512	11544	5141.24	9281.49	0.315614	0.289374	5559	5206	5658.67	5445.09	-0.0509445	-0.09008	4951	4453	3708.92	3677.46	0.39131	0.250689	1	1	1	0.6484	SPAR	NA	NA	NA	REPS_DISAGREE	0.0002	SCER	NA	0.3476	SCER	NA	0.688667	NA	0.000243994	0.500767
Scer_1.55	Spar_1.37	YAL032C	S000000030	PRP45	796	811	8559	9608	18433	17821.1	-1.07976	-0.864277	5847	9192	10652.3	17503.2	-0.838353	-0.902157	3588	2115	9911.5	6735.3	-1.43873	-1.64368	3741	3600	9347	9229.51	-1.29392	-1.33108	1	1	1	0.0002	SPAR	NA	0.0002	SPAR	NA	NA	NA	REPS_DISAGREE	0.0002	SCER	NA	0.000334064	0.000685507	NA	0.000633882
Scer_1.56	Spar_1.38	YAL031C	S000000029	GIP4	1932	1932	11886	16102	14201.9	12896.4	-0.256803	0.320251	7632	11482	9708.25	10326.7	-0.34711	0.152981	2136	1681	3055.74	1721.62	-0.516408	-0.0344308	4496	4398	4332.06	4011.09	0.0535773	0.132822	1	1	1	NA	NA	REPS_DISAGREE	0.016	SPAR	NA	NA	NA	REPS_DISAGREE	0.8032	SCER	NA	NA	0.0315596	NA	0.920383
Scer_1.58	Spar_1.40	NA	NA	NA	3607	3610	59684	72390	63543.2	69503.9	-0.0891919	0.0598944	25524	30363	40023.9	58518.8	-0.647788	-0.945363	8309	10148	9193.45	7372.34	-0.144715	0.462146	13447	10506	16581.3	18822.7	-0.301055	-0.839998	1	1	1	NA	NA	REPS_DISAGREE	NA	NA	REPS_DISAGREE	0.0002	SPAR	NA	NA	NA	REPS_DISAGREE	NA	NA	0.000243994	NA
Scer_1.59	Spar_1.41	YAL028W	S000000026	FRT2	1559	1574	3439	3801	1154.48	1886.72	1.58773	1.02393	9063	13006	2088.2	1895.46	2.13101	2.79172	583	303	83.7052	30.2393	2.79926	3.29645	1280	1494	249.68	180.995	2.36717	3.05199	1	0	0	0.0002	SCER	NA	NA	NA	LOW_COV	0.0002	SCER	NA	NA	NA	LOW_COV	0.000334064	NA	0.000243994	NA
Scer_1.60	Spar_1.42	YAL027W	S000000025	SAW1	729	729	8207	9109	8722.1	11779.8	-0.0878097	-0.370919	6128	11049	12037.2	16931.2	-0.973899	-0.615721	1028	2554	1935.3	1029.14	-0.912062	1.31048	2267	2329	4361.93	3515.23	-0.943878	-0.593699	1	0	0	0.0312	SPAR	NA	NA	NA	LOW_COV	0.0002	SPAR	NA	NA	NA	LOW_COV	0.040604	NA	0.000243994	NA
Scer_1.62	Spar_1.43	NA	NA	NA	2629	2629	33568	35737	36643.9	42610.5	-0.126484	-0.253783	17291	19658	13332.1	17081.5	0.375096	0.202673	11826	8318	13098.3	7062.9	-0.147411	0.235946	19502	19227	13218.1	14789.5	0.561071	0.378539	1	1	1	0.0002	SPAR	NA	NA	NA	REPS_DISAGREE	0.0002	SCER	NA	0.8148	SCER	NA	0.000334064	NA	0.000243994	0.928934
Scer_1.63	Spar_1.44	YAL025C	S000000023	MAK16	661	661	52677	54726	57976.1	54636.5	-0.138282	0.00236229	22105	24557	36734.4	66129	-0.732733	-1.42911	25157	13803	35353.8	20758.3	-0.49089	-0.58867	14793	16651	36229.2	40925.8	-1.29218	-1.29735	1	1	1	NA	NA	REPS_DISAGREE	0.0002	SPAR	NA	0.0002	SPAR	NA	0.0002	SCER	NA	NA	0.000685507	0.000243994	0.000633882
Scer_1.64	Spar_1.45	YAL024C	S000000022	LTE1	3347	3368	16849	26696	20334.4	24514.5	-0.262219	0.13201	5358	6285	11107	15496.9	-1.04254	-1.29284	2899	3188	3956.33	2815.28	-0.439451	0.188337	3372	2884	6259.08	7310.71	-0.883124	-1.33261	1	1	1	NA	NA	REPS_DISAGREE	NA	NA	REPS_DISAGREE	0.0002	SPAR	NA	NA	NA	REPS_DISAGREE	NA	NA	0.000243994	NA
Scer_1.65	Spar_1.46	NA	NA	NA	1373	1373	108242	101236	108319	117549	-0.00102651	-0.215541	50550	66057	54727	57870.4	-0.11454	0.190884	59100	36939	66630.3	47399.1	-0.173018	-0.359707	111551	92542	76348.8	82299.5	0.54702	0.169223	1	1	1	0.955	SPAR	NA	0.0182	SPAR	NA	NA	NA	REPS_DISAGREE	0.609	SCER	NA	0.962613	0.0353681	NA	0.768452
Scer_1.66	Spar_1.47	YAL022C	S000000020	FUN26	1385	1388	23722	29072	16341.3	15581.1	0.540798	0.902915	23277	35760	9650.22	11879.5	1.27331	1.59292	7569	6312	5348.05	4984.45	0.504131	0.343725	19671	14299	6459.67	6576.72	1.60951	1.12348	1	1	1	0.0002	SCER	NA	0.5186	SPAR	NA	0.0002	SCER	NA	0.0002	SPAR	NA	0.000334064	0.613244	0.000243994	0.000633882
Scer_1.67	Spar_1.48	YAL021C	S000000019	CCR4	1575	1638	33042	30575	42612.7	42610.5	-0.31039	-0.422259	11312	15671	20026.2	22105.7	-0.767399	-0.43971	28915	17798	30237.7	22773.2	-0.00794643	-0.299022	27368	30856	40815.2	32729.7	-0.520017	-0.0284636	1	1	1	0.0002	SPAR	NA	0.0554	SCER	NA	0.0036	SPAR	NA	0.0002	SCER	NA	0.000334064	0.0943276	0.00411831	0.000633882
Scer_1.68	Spar_1.49	YAL020C	S000000018	ATS1	1002	1002	17142	13128	17144.7	17116.4	-0.000224149	-0.382711	11379	21613	13297.4	21319	-0.224754	0.0197594	5237	3451	3265.51	3198.31	0.681266	0.109671	6233	5480	5518.57	3908.92	0.175602	0.487302	1	1	1	0.9618	SPAR	NA	0.0002	SCER	NA	NA	NA	REPS_DISAGREE	NA	NA	REPS_DISAGREE	0.968151	0.000685507	NA	NA
Scer_1.69	Spar_1.51	YAL019W	S000000017	FUN30	2406	2412	46899	49077	43569.8	48126.7	0.109819	0.0318012	15734	18453	24011.2	29127.6	-0.606199	-0.654908	27026	21391	24930	18603.2	0.120053	0.205034	23689	26153	40877.1	37515.7	-0.783458	-0.516907	1	1	1	0.3874	SCER	NA	0.8028	SCER	NA	0.0002	SPAR	NA	0.0002	SPAR	NA	0.430499	0.857166	0.000243994	0.000633882
Scer_1.70	Spar_1.52	YAL018C	S000000016	NA	831	831	54	0	82.3214	0	-0.599255	0	0	52	103.067	72.1426	-6.70137	-0.464719	0	0	40.3398	0	-5.36946	0	0	0	0	95.0851	0	-6.58624	0	0	0	NA	NA	NA	NA	NA	NA	NA	NA	NA	NA	NA	NA	NA	NA	NA	NA
Scer_1.71	Spar_1.53	NA	NA	NA	3176	3205	22493	24487	26017.5	31624.6	-0.196885	-0.355906	18630	18769	11876.1	14861.4	0.662632	0.349878	6089	4616	5773.64	3590.41	0.0898246	0.375517	12537	10494	6067.02	7965.88	1.06012	0.410729	1	1	1	0.0002	SPAR	NA	0.0002	SCER	NA	0.0002	SCER	NA	NA	NA	REPS_DISAGREE	0.000334064	0.000685507	0.000243994	NA
Scer_1.73	Spar_1.56	YAL016W	S000000014	TPD3	1312	1303	70844	73439	76663	68723.8	-0.123814	0.0858039	48358	54862	52110.5	70598.4	-0.117748	-0.373753	45039	19993	50360.3	28845.3	-0.171038	-0.538749	46848	47450	47592.9	49928	-0.0326886	-0.0833707	1	1	1	NA	NA	REPS_DISAGREE	0.3356	SPAR	NA	NA	NA	REPS_DISAGREE	0.0002	SCER	NA	NA	0.433003	NA	0.000633882
Scer_1.74	Spar_1.57	YAL015C	S000000013	NTG1	944	944	9616	11728	6614.47	6704.26	0.539743	0.806716	7445	9596	7534.31	12037.5	-0.0172011	-0.327001	2990	1457	3006.33	1985.71	-0.00785377	-0.446394	2814	2534	4961.59	4044.87	-0.817959	-0.674464	1	1	1	0.0002	SCER	NA	0.0002	SPAR	NA	0.0002	SPAR	NA	0.3992	SPAR	NA	0.000334064	0.000685507	0.000243994	0.560958
Scer_1.75	Spar_1.58	YAL014C	S000000012	SYN8	574	553	15469	16003	14778.2	15186.1	0.0121365	0.0218188	14926	25152	10066	14432.8	0.514526	0.747507	3662	4483	4159.04	3736.57	-0.237342	0.208914	7929	10598	5642.35	4061.13	0.436999	1.32985	1	1	1	0.7698	SCER	NA	NA	NA	REPS_DISAGREE	0.0002	SCER	NA	NA	NA	REPS_DISAGREE	0.800629	NA	0.000243994	NA
Scer_1.76	Spar_1.59	YAL013W	S000000011	DEP1	722	722	16754	18104	13406.5	12624.4	0.321554	0.520054	15474	20921	8009.8	10410.9	0.94992	1.00679	7030	7229	7340.84	5642.66	-0.0624124	0.357366	9378	11256	6246.27	6235.58	0.586208	0.851995	1	1	1	0.0002	SCER	NA	0.1256	SPAR	NA	0.0002	SCER	NA	0.4818	SPAR	NA	0.000334064	0.191148	0.000243994	0.646345
Scer_1.77	Spar_1.60	YAL012W	S000000010	CYS3	597	597	152116	138741	167143	135056	-0.135911	0.0388385	89661	151483	80892.3	104512	0.148477	0.535479	138779	106077	148602	76011.5	-0.0986626	0.480816	177933	166322	164955	149659	0.109258	0.1523	1	1	1	NA	NA	REPS_DISAGREE	0.5676	SCER	NA	0.0002	SCER	NA	0.2408	SPAR	NA	NA	0.657292	0.000243994	0.373899
Scer_1.78	Spar_1.61	YAL011W	S000000009	SWC3	1454	1608	16456	14740	19816.6	20781.7	-0.122843	-0.350309	8141	10650	11064.6	16811.8	-0.297384	-0.513331	3101	2515	2386.1	3422.08	0.523179	-0.298924	2039	3117	4460.1	4894.38	-0.98359	-0.50556	1	1	1	0.0002	SPAR	NA	0.6704	SCER	NA	NA	NA	REPS_DISAGREE	0.4648	SPAR	NA	0.000334064	0.748228	NA	0.628916
Scer_1.79	Spar_1.62	YAL010C	S000000008	MDM10	1127	1127	6689	7059	12330.4	16304.6	-0.882253	-1.20763	5535	8739	9301.18	11591.8	-0.748725	-0.40752	1607	1245	2989.18	1616.8	-0.894966	-0.376725	2524	1594	3920.19	3847.61	-0.635009	-1.27078	1	0	0	0.0002	SPAR	NA	NA	NA	LOW_COV	0.0002	SCER	NA	NA	NA	LOW_COV	0.000334064	NA	0.000243994	NA
Scer_1.80	Spar_1.63	YAL009W	S000000007	SPO7	540	540	7456	6187	7209.57	7746.37	0.0484828	-0.324233	7122	9153	4820.78	7405.78	0.562919	0.305556	2033	864	2893.38	2313.31	-0.508932	-1.41981	1607	2423	1809.65	1952.58	-0.171239	0.311269	1	1	1	NA	NA	REPS_DISAGREE	0.0002	SPAR	NA	0.0002	SCER	NA	0.7204	SCER	NA	NA	0.000685507	0.000243994	0.86448
Scer_1.81	Spar_1.64	YAL008W	S000000006	FUN14	542	551	7786	5464	9571.1	6709.22	-0.274008	-0.272379	9924	14184	5390.68	8438.1	0.904091	0.772964	5398	1439	6018.7	2516.92	-0.133241	-0.782403	9422	10363	4169.87	3225.8	1.1996	1.70716	1	1	1	0.0022	SPAR	NA	NA	NA	REPS_DISAGREE	0.0002	SCER	NA	0.7228	SCER	NA	0.00326139	NA	0.000243994	0.866202
Scer_1.82	Spar_1.65	YAL007C	S000000005	ERP2	386	386	30638	34835	28239.2	34357	0.117619	0.0199348	24590	36020	18986	31836.3	0.373115	0.178118	12743	6882	21539.5	13651	-0.757231	-0.988006	16760	16849	23284.3	23282.9	-0.47431	-0.466585	1	1	1	0.7148	SCER	NA	0.0002	SPAR	NA	0.0056	SCER	NA	0.103	SCER	NA	0.748981	0.000685507	0.00630977	0.182788
Scer_1.84	Spar_1.73	NA	NA	NA	167	259	75244	54580	53798.5	57819.4	1.11711	0.549925	62664	97828	27444.5	38648.7	1.82419	1.97291	131096	69288	83738.5	57300.5	1.27976	0.907158	161681	234833	100717	99529.5	1.31594	1.87153	1	1	1	0.0002	SCER	NA	0.2586	SCER	NA	0.0002	SCER	NA	0.0002	SPAR	NA	0.000334064	0.350481	0.000243994	0.000633882
Scer_1.85	Spar_1.74	YAL003W	S000000003	EFB1	108	108	204471	161967	211658	207521	-0.0498395	-0.357558	114134	161710	118846	209331	-0.0583663	-0.372376	169882	117471	194258	91622.1	-0.193436	0.358534	214210	191341	151703	164677	0.497772	0.216506	1	1	1	0.3726	SPAR	NA	NA	NA	REPS_DISAGREE	NA	NA	REPS_DISAGREE	0.5984	SCER	NA	0.415237	NA	NA	0.76042
Scer_1.86	Spar_1.75	YAL002W	S000000002	VPS8	3092	3086	22857	33099	14413.2	14790.1	0.662408	1.1593	14950	18945	6176.25	6535.77	1.2724	1.53244	2741	2478	1705.37	715.664	0.681498	1.78759	4187	3097	1752.03	2498.49	1.25361	0.306903	1	1	1	0.0002	SCER	NA	0.8466	SCER	NA	0.0002	SCER	NA	0.0002	SPAR	NA	0.000334064	0.887898	0.000243994	0.000633882
Scer_1.88	Spar_1.77	YAR002W	S000000063	NUP60	1364	1364	37325	42553	32090.5	35978.7	0.217992	0.242112	22560	28802	22911.3	35341.3	-0.022289	-0.295176	30593	21373	18166	14439.3	0.751925	0.565759	21235	26035	25507.9	26132.1	-0.26449	-0.00537258	1	1	1	0.0002	SCER	NA	0.0002	SCER	NA	0.0002	SPAR	NA	0.0002	SPAR	NA	0.000334064	0.000685507	0.000243994	0.000633882
Scer_1.89	Spar_1.78	YAR002C-A	S000002129	ERP1	440	440	52297	45954	53767.8	39954.6	-0.0400122	0.201825	41772	66522	38091.6	67079.7	0.13306	-0.0120448	23018	11918	26799.8	14153	-0.21945	-0.247947	33687	29070	29069.6	30994.4	0.212674	-0.0924738	1	1	1	NA	NA	REPS_DISAGREE	0.0794	SPAR	NA	NA	NA	REPS_DISAGREE	0.2288	SCER	NA	NA	0.12897	NA	0.357326
Scer_1.90	Spar_1.79	YAR003W	S000000064	SWD1	851	851	13460	14245	10676	12660.2	0.334281	0.170145	9473	12242	10052.1	14705.1	-0.0855945	-0.264454	2940	1308	2818.75	1688.36	0.0607413	-0.368013	3591	2495	3267.18	3297.12	0.136299	-0.402025	1	0	0	0.0032	SCER	NA	NA	NA	LOW_COV	0.0002	SPAR	NA	NA	NA	LOW_COV	0.00465334	NA	0.000243994	NA
Scer_1.91	Spar_1.80	YAR007C	S000000065	RFA1	1359	1359	34621	37337	35783	36942.4	-0.0476262	0.0153285	21542	28563	21691.8	31072	-0.00999563	-0.121463	23732	14513	30216.6	18400.6	-0.348493	-0.342388	25879	27493	36378.6	35881.3	-0.491293	-0.384155	1	1	1	NA	NA	REPS_DISAGREE	0.0002	SPAR	NA	NA	NA	REPS_DISAGREE	NA	NA	REPS_DISAGREE	NA	0.000685507	NA	NA
Scer_1.92	Spar_1.81	YAR008W	S000000066	SEN34	600	669	12892	13381	12442.4	11998.2	0.208248	0.314401	9239	12117	8467.98	15458.3	0.282749	-0.194276	2258	2293	5947.1	2601.59	-1.2397	-0.0250382	2328	2204	4487.84	4719.22	-0.789589	-0.941033	1	1	1	0.0002	SCER	NA	0.0024	SPAR	NA	NA	NA	REPS_DISAGREE	0.98	SPAR	NA	0.000334064	0.00596219	NA	1
Scer_10.100	Spar_10.100	YJL134W	S000003670	LCB3	979	979	32228	33386	36904.8	33497.5	-0.195487	-0.00480836	25283	33677	28369.5	43915.1	-0.166167	-0.382943	8007	6490	11707.6	8507.33	-0.548059	-0.390435	12861	10510	11572.8	13264.8	0.152254	-0.335811	1	1	1	0.8566	SPAR	NA	0.0002	SPAR	NA	NA	NA	REPS_DISAGREE	0.0002	SCER	NA	0.87604	0.000685507	NA	0.000633882
Scer_10.101	Spar_10.101	YJL133C-A	S000028805	NA	225	225	27102	34891	7519.02	9873.27	1.84965	1.82115	23556	47551	4279.46	4949.5	2.46032	3.26386	13913	18993	4626.98	7271.55	1.58808	1.38501	17858	36441	5098.17	3839.69	1.80832	3.24617	1	1	1	0.0002	SCER	NA	0.1062	SPAR	NA	0.0002	SCER	NA	0.0002	SPAR	NA	0.000334064	0.165894	0.000243994	0.000633882
Scer_10.102	Spar_10.102	YJL133W	S000003669	MRS3	504	504	17431	13891	14713.7	18776.9	0.24448	-0.43478	10626	17652	10316.3	14413.1	0.0426743	0.292437	5437	3473	6406.98	3301.12	-0.236793	0.0732031	3752	4523	6408.46	5123.75	-0.772158	-0.179883	1	1	1	NA	NA	REPS_DISAGREE	NA	NA	REPS_DISAGREE	NA	NA	REPS_DISAGREE	0.7342	SPAR	NA	NA	NA	NA	0.872728
Scer_10.103	Spar_10.103	YJL132W	S000003668	NA	1873	1876	5667	6320	4061.52	4008.66	0.482775	0.658982	4964	7778	2568.02	3114.15	0.952883	1.32259	861	613	662.582	88.702	0.379722	2.77734	1539	1788	514.299	893.717	1.58176	1.00196	1	0	0	0.0002	SCER	NA	NA	NA	LOW_COV	0.0002	SCER	NA	NA	NA	LOW_COV	0.000334064	NA	0.000243994	NA
Scer_10.104	Spar_10.104	YJL131C	S000003667	AIM23	964	964	7948	9837	12811.4	10902.5	-0.688694	-0.148352	7788	11764	9014.49	16319.7	-0.210969	-0.4722	2409	508	5768.6	2434.26	-1.25944	-2.25834	1904	1876	7328.22	6541.27	-1.94387	-1.80136	1	0	0	0.0696	SPAR	NA	NA	NA	LOW_COV	NA	NA	REPS_DISAGREE	NA	NA	LOW_COV	0.0863168	NA	NA	NA
Scer_10.105	Spar_10.105	YJR109C	S000003870	CPA2	4286	4274	167481	184364	153116	162346	0.125329	0.179437	51668	57340	30753	41108.4	0.744478	0.476054	249734	150532	268000	152133	-0.105884	-0.0193074	229353	212574	170312	186357	0.425345	0.185849	1	1	0	0.0002	SCER	NA	0.0002	SPAR	NA	0.0002	SCER	NA	0.0002	SPAR	NA	0.000334064	0.000685507	0.000243994	0.000633882
Scer_10.106	Spar_10.106	YJL129C	S000003665	TRK1	2889	2850	37001	38882	32145	29735.9	0.183356	0.367275	16910	18446	18550.4	21852.3	-0.153174	-0.264075	3149	3234	2329.63	2196.38	0.415026	0.538372	4574	3281	4976.53	7183.51	-0.141267	-1.14992	1	1	1	0.0002	SCER	NA	0.1486	SCER	NA	0.0002	SPAR	NA	0.1654	SPAR	NA	0.000334064	0.220062	0.000243994	0.273702
Scer_10.107	Spar_10.107	YJL128C	S000003664	PBS2	1441	1441	33831	42373	36767.9	42406	-0.120097	-0.00112424	24249	30794	35308.8	40291.6	-0.542084	-0.38782	13113	8903	17347.1	12573.5	-0.403673	-0.497976	15083	14575	22866	20539.6	-0.600249	-0.494886	1	1	1	0.959	SPAR	NA	0.0002	SPAR	NA	0.0002	SPAR	NA	0.0002	SCER	NA	0.96561	0.000685507	0.000243994	0.000633882
Scer_10.111	Spar_10.112	YJL127C	S000003663	SPT10	1529	1134	13620	16748	5696.04	7211.42	0.82638	0.784352	8427	10015	3166.51	4566.45	0.980675	0.701677	2762	1492	1644.86	1520.03	0.316229	-0.458002	4210	3889	2253.52	1432.53	0.470172	1.00903	1	1	1	0.0002	SCER	NA	0.0002	SPAR	NA	NA	NA	REPS_DISAGREE	NA	NA	REPS_DISAGREE	0.000334064	0.000685507	NA	NA
Scer_10.112	Spar_10.113	YJL126W	S000003662	NIT2	895	895	10498	10518	9917.24	8587.01	0.0820952	0.292602	7901	12536	9036.15	13802.4	-0.19365	-0.138834	4090	3142	2627.13	1611.76	0.638416	0.962615	4204	4114	4364.07	3854.7	-0.0538984	0.0938996	1	1	1	0.0394	SCER	NA	0.0002	SCER	NA	0.0002	SPAR	NA	0.0018	SPAR	NA	0.0504516	0.000685507	0.000243994	0.00474481
Scer_10.113	Spar_10.114	YJL125C	S000003661	GCD14	931	943	33241	38066	37072.4	42955.9	-0.1389	-0.155871	17387	23985	25836.1	42887	-0.552877	-0.819906	12097	10031	16740	13144	-0.450143	-0.371431	9554	8265	16295.4	20075.1	-0.751746	-1.26174	1	1	1	0.0004	SPAR	NA	0.0632	SPAR	NA	0.0002	SPAR	NA	NA	NA	REPS_DISAGREE	0.000643008	0.105706	0.000243994	NA
Scer_10.114	Spar_10.115	YJL124C	S000003660	LSM1	247	247	17135	13825	15015.2	15751.8	0.190509	-0.188222	15410	21381	9329.76	13573.1	0.723894	0.655539	8282	4826	5807.93	4745.56	0.511881	0.0242458	7841	10139	5298.77	5713.86	0.565292	0.827267	1	1	1	NA	NA	REPS_DISAGREE	0.4686	SCER	NA	0.0002	SCER	NA	0.0168	SPAR	NA	NA	0.568813	0.000243994	0.0365879
Scer_10.115	Spar_10.116	YJL123C	S000003659	MTC1	1295	1282	68563	71337	69566.5	69788.8	-0.0355183	0.0170992	60942	81634	38226.7	58675.1	0.658285	0.461859	29804	17910	29899.9	19079	-0.01919	-0.10577	35606	32208	25337.2	26834.4	0.476291	0.248769	1	1	1	NA	NA	REPS_DISAGREE	NA	NA	REPS_DISAGREE	0.0002	SCER	NA	0.639	SPAR	NA	NA	NA	0.000243994	0.794401
Scer_10.116	Spar_10.117	YJL122W	S000003658	ALB1	338	338	29775	22527	35165.1	27092.9	-0.240036	-0.266251	11762	17512	22993.5	38237.3	-0.967036	-1.12659	24480	11511	31534.7	15659.9	-0.365322	-0.444031	9283	14309	23126.4	19799	-1.31678	-0.468475	1	1	1	0.0004	SPAR	NA	0.4212	SPAR	NA	0.0002	SPAR	NA	0.137	SCER	NA	0.000643008	0.521811	0.000243994	0.233742
Scer_10.117	Spar_10.118	YJL121C	S000003657	RPE1	383	383	40266	30692	49469.2	38125.4	-0.296961	-0.312882	29045	52389	36462.5	58693.1	-0.328112	-0.163925	32220	33661	38220	31686.8	-0.246364	0.0871949	52871	59827	42767.9	40632.2	0.305943	0.558162	1	1	1	0.0002	SPAR	NA	0.5366	SCER	NA	NA	NA	REPS_DISAGREE	0.2592	SCER	NA	0.000334064	0.628558	NA	0.397204
Scer_10.119	Spar_10.121	YJL118W	S000003654	NA	375	375	2615	4232	4357.08	4002.7	-0.736331	0.0803452	2545	5667	6995.59	10045.9	-1.45842	-0.825832	261	84	382.22	400.167	-0.548606	-2.23867	476	426	1461.8	818.232	-1.61667	-0.940037	1	0	0	NA	NA	REPS_DISAGREE	NA	NA	LOW_COV	0.0002	SPAR	NA	NA	NA	LOW_COV	NA	NA	0.000243994	NA
Scer_10.120	Spar_10.122	YJL117W	S000003653	PHO86	763	763	60953	66852	43260.4	45382.5	0.494641	0.558824	55301	77853	27424.6	41094.6	1.01181	0.921786	30767	26266	22858.6	16596.3	0.428632	0.662299	49690	51545	22932.2	25409.8	1.11555	1.02042	1	1	1	0.0002	SCER	NA	NA	NA	REPS_DISAGREE	0.0002	SCER	NA	0.0002	SPAR	NA	0.000334064	NA	0.000243994	0.000633882
Scer_10.121	Spar_10.123	YJL116C	S000003652	NCA3	798	798	968	201	425.492	109.174	1.18398	0.874576	339	485	1328.62	1116.49	-1.9674	-1.20124	722	1049	506.265	225.787	0.511256	2.21098	974	1236	1732.82	1205.25	-0.830483	0.0363221	0	0	0	NA	NA	NA	NA	NA	NA	NA	NA	NA	NA	NA	NA	NA	NA	NA	NA
Scer_10.122	Spar_10.124	YJL115W	S000003651	ASF1	614	644	24301	23106	19460.6	18905.9	0.389269	0.358239	18088	18439	11139.9	21030.4	0.768065	-0.120886	9411	7607	12414.6	8116.23	-0.330757	-0.0246484	14428	17620	14801.6	15447.6	0.0319472	0.258644	1	1	1	0.0002	SCER	NA	0.0002	SPAR	NA	NA	NA	REPS_DISAGREE	NA	NA	REPS_DISAGREE	0.000334064	0.000685507	NA	NA
Scer_10.137	Spar_10.133	YJL112W	S000003648	MDV1	1748	1739	31827	29858	30400.4	27457.2	0.0587121	0.113483	17000	22116	18408.3	26223	-0.122266	-0.253177	3673	2216	4911.38	4158.91	-0.426517	-0.915392	4240	2986	6547.17	7368.68	-0.634134	-1.31035	1	1	1	0.0404	SCER	NA	0.0002	SPAR	NA	0.0002	SPAR	NA	NA	NA	REPS_DISAGREE	0.0516378	0.000685507	0.000243994	NA
Scer_10.138	Spar_10.134	YJL111W	S000003647	CCT7	1063	1063	114376	114821	118670	118526	-0.053167	-0.0458153	58532	68161	70126.5	109303	-0.26073	-0.681305	41083	31591	48820.3	31369.3	-0.248934	0.0101621	43297	44182	52550.2	56709.1	-0.279424	-0.360114	1	1	1	0.1402	SPAR	NA	NA	NA	REPS_DISAGREE	0.0002	SPAR	NA	0.0002	SCER	NA	0.166568	NA	0.000243994	0.000633882
Scer_10.139	Spar_10.135	YJL110C	S000003646	GZF3	1414	1411	25690	22505	21116.9	19330.7	0.279731	0.216278	20345	25002	15553.6	19959.4	0.384336	0.321893	9645	6891	8976.62	5894.65	0.100533	0.222208	7620	8334	8755.88	8756.17	-0.203501	-0.0743467	1	1	1	0.0002	SCER	NA	NA	NA	REPS_DISAGREE	0.0068	SCER	NA	0.0006	SPAR	NA	0.000334064	NA	0.00762545	0.00172141
Scer_10.140	Spar_10.136	YJL109C	S000003645	UTP10	4211	4211	147563	160542	142432	148966	0.0510591	0.107962	35480	37449	56471.4	76709	-0.670499	-1.03445	48048	33035	57803	34458.7	-0.266662	-0.0608712	45514	26577	61250.6	90569.8	-0.428406	-1.76881	1	1	1	0.0228	SCER	NA	0.002	SPAR	NA	0.0002	SPAR	NA	NA	NA	REPS_DISAGREE	0.0301307	0.00510799	0.000243994	NA
Scer_10.141	Spar_10.137	YJL108C	S000003644	PRM10	850	850	17002	16367	16551.6	15488.8	0.0387356	0.0795626	4535	7885	15959	14465.4	-1.81497	-0.875345	0	397	3041.62	774.126	-11.5711	-0.961663	189	16	4261.64	4730.48	-4.48767	-8.12061	1	0	0	0.2164	SCER	NA	NA	NA	LOW_COV	0.0002	SPAR	NA	NA	NA	LOW_COV	0.250975	NA	0.000243994	NA
Scer_10.143	Spar_10.138	YJL106W	S000003642	IME2	1612	1615	3488	4684	2512.29	3939.18	0.475919	0.252468	4061	6807	2814.86	2888.28	0.531295	1.2392	0	0	66.5607	136.077	-6.07543	-7.09616	0	0	362.783	164.731	-8.50425	-7.37002	1	0	0	0.009	SCER	NA	NA	NA	LOW_COV	0.0002	SCER	NA	NA	NA	LOW_COV	0.0124522	NA	0.000243994	NA
Scer_10.144	Spar_10.139	YJL105W	S000003641	SET4	1250	1253	143	56	437.394	1073.87	-1.6027	-4.2336	303	325	334.319	914.665	-0.138006	-1.48649	0	0	0	0	0.00345832	0.00345832	14	27	44.8144	153.054	-1.60738	-2.45648	0	0	0	NA	NA	NA	NA	NA	NA	NA	NA	NA	NA	NA	NA	NA	NA	NA	NA
Scer_10.145	Spar_10.140	YJL104W	S000003640	PAM16	278	278	20351	16466	15883.1	13770.8	0.35759	0.257864	12682	20171	9725.57	18090.6	0.382893	0.157033	9592	4672	6603.63	2793.1	0.538504	0.741963	6761	9840	8139.15	8697.37	-0.267605	0.17806	1	1	1	0.0006	SCER	NA	0.0526	SCER	NA	NA	NA	REPS_DISAGREE	0.0236	SPAR	NA	0.000945863	0.090472	NA	0.0494389
Scer_10.146	Spar_10.141	YJL103C	S000003639	GSM1	1663	1731	2627	2562	6081.86	6672.5	-1.15297	-1.32279	1815	3068	5568.23	6608.78	-1.5589	-1.04901	602	30	851.171	793.278	-0.441167	-4.62149	546	612	3072.99	1970.1	-2.43268	-1.62722	1	0	0	0.0002	SPAR	NA	NA	NA	LOW_COV	NA	NA	REPS_DISAGREE	NA	NA	LOW_COV	0.000334064	NA	NA	NA
Scer_10.147	Spar_10.142	YJL102W	S000003638	MEF2	2204	2204	13890	14076	13787.3	15967.1	0.0107016	-0.181857	5958	7353	11781.7	15575.9	-0.983531	-1.08281	5300	3223	3372.41	2295.16	0.652056	0.489626	3201	2302	7819.04	8737.82	-1.2882	-1.92392	1	1	1	NA	NA	REPS_DISAGREE	0.0002	SCER	NA	0.0002	SPAR	NA	0.0004	SPAR	NA	NA	0.000685507	0.000243994	0.00118809
Scer_10.149	Spar_10.144	YJL101C	S000003637	GSH1	1687	1687	47337	48914	75842.8	68304	-0.680032	-0.481715	28231	33204	42174.5	50518.7	-0.579073	-0.605445	14362	7877	24629.5	13383.9	-0.778088	-0.764707	16834	11392	26192.9	28732.4	-0.63777	-1.33458	1	1	1	0.0002	SPAR	NA	0.144	SPAR	NA	NA	NA	REPS_DISAGREE	0.0002	SCER	NA	0.000334064	0.214054	NA	0.000633882
Scer_10.150	Spar_10.145	YJL100W	S000003636	LSB6	1415	1415	13383	17687	18131.5	21331.5	-0.438071	-0.270285	7493	11189	13477.6	18422.1	-0.84686	-0.719308	2475	2066	4008.77	4377.64	-0.695509	-1.08295	2361	2361	8119.94	6936.63	-1.78164	-1.55443	1	1	1	0.0002	SPAR	NA	0.0008	SPAR	NA	0.0002	SPAR	NA	NA	NA	REPS_DISAGREE	0.000334064	0.0023017	0.000243994	NA
Scer_10.151	Spar_10.146	YJL099W	S000003635	CHS6	1885	1885	12802	13584	11362.3	13485.9	0.172096	0.010453	7182	11267	8626.48	11702.6	-0.264352	-0.0547155	2380	1419	2686.63	1247.88	-0.174769	0.185261	4434	3326	3393.09	4152.05	0.385909	-0.319949	1	0	0	0.854	SCER	NA	NA	NA	LOW_COV	0.002	SPAR	NA	NA	NA	LOW_COV	0.873942	NA	0.00230862	NA
Scer_10.152	Spar_10.147	NA	NA	NA	2544	2556	46711	46699	51788.1	57754.9	-0.142065	-0.299756	19931	19540	21780.1	30915.7	-0.121203	-0.655091	12245	9358	9261.02	6555.88	0.409701	0.520133	13566	11754	7528.82	9263.71	0.856204	0.350246	1	1	1	0.0002	SPAR	NA	0.0002	SCER	NA	NA	NA	REPS_DISAGREE	0.986	SCER	NA	0.000334064	0.000685507	NA	1
Scer_10.153	Spar_10.148	YJL097W	S000003633	PHS1	451	451	20560	17635	22329.9	21483.4	-0.119132	-0.284766	21118	36144	14822.6	22232.8	0.510642	0.701042	14583	11402	21854.1	13708.5	-0.583584	-0.265761	24273	23794	17908.7	20764.4	0.438672	0.196476	1	1	1	0.0052	SPAR	NA	NA	NA	REPS_DISAGREE	0.0002	SCER	NA	0.8956	SCER	NA	0.00740504	NA	0.000243994	0.973667
Scer_10.154	Spar_10.149	YJL096W	S000003632	MRPL49	404	404	16785	17935	26357.7	24868.8	-0.651021	-0.471535	10353	17830	15219.3	26231.6	-0.555811	-0.556971	8714	5028	10082.9	4274.83	-0.210487	0.234067	5148	4520	10749.1	10079.4	-1.06198	-1.15684	1	1	1	0.0002	SPAR	NA	0.0002	SCER	NA	NA	NA	REPS_DISAGREE	0.0234	SPAR	NA	0.000334064	0.000685507	NA	0.0491729
Scer_10.155	Spar_10.150	YJL095W	S000003631	BCK1	3716	3719	24108	32636	19494.3	23556.7	0.30761	0.471474	12242	12459	15277.4	15875.7	-0.318368	-0.348439	3809	3007	5043.49	4405.87	-0.403753	-0.549785	6216	4581	11711.5	9125.25	-0.912594	-0.992881	1	1	1	0.0002	SCER	NA	0.0002	SPAR	NA	0.0002	SPAR	NA	0.0268	SPAR	NA	0.000334064	0.000685507	0.000243994	0.055156
Scer_10.156	Spar_10.151	YJL094C	S000003630	KHA1	2137	2137	23208	25636	19186.8	21304.7	0.274493	0.266985	14128	15969	15755.4	17722.2	-0.157283	-0.150272	3917	1956	2932.71	2246.78	0.417393	-0.199858	7260	5798	4942.39	6432.01	0.554668	-0.149689	1	1	1	0.0002	SCER	NA	NA	NA	REPS_DISAGREE	0.0002	SPAR	NA	NA	NA	REPS_DISAGREE	0.000334064	NA	0.000243994	NA
Scer_10.157	Spar_10.152	YJL093C	S000003629	TOK1	1941	1929	20904	27952	10105.7	11434.5	1.03959	1.28054	15591	18926	5026.91	6579.57	1.62383	1.51521	861	314	1681.16	1918.18	-0.973505	-2.61601	2737	2226	667.948	963.362	2.02421	1.19851	1	0	0	0.0002	SCER	NA	NA	NA	LOW_COV	0.0002	SCER	NA	NA	NA	LOW_COV	0.000334064	NA	0.000243994	NA
Scer_10.158	Spar_10.153	YJL092W	S000003628	SRS2	3081	3087	18913	24317	19906.9	17447.9	-0.0710792	0.481692	13425	14581	10773.6	12801	0.320206	0.190625	2374	1001	3310.89	1898.02	-0.476922	-0.919566	5157	3316	4167.74	4936.92	0.310008	-0.571217	1	0	0	NA	NA	REPS_DISAGREE	NA	NA	LOW_COV	NA	NA	REPS_DISAGREE	NA	NA	LOW_COV	NA	NA	NA	NA
Scer_10.159	Spar_10.154	YJL091C	S000003627	GWT1	1335	1335	21238	20882	23282.1	20474	-0.132565	0.0284631	16273	24593	14903.2	19975.8	0.126851	0.299984	6137	2754	7203.69	5314.05	-0.231167	-0.948032	10586	6451	5757.58	7152.65	0.878508	-0.148933	1	1	1	NA	NA	REPS_DISAGREE	0.1364	SPAR	NA	0.0002	SCER	NA	0.9276	SCER	NA	NA	0.205338	0.000243994	0.98851
Scer_10.160	Spar_10.155	YJL090C	S000003626	DPB11	1921	1918	13041	19288	15152.1	19852.7	-0.218702	-0.043887	8616	10798	9557.55	11074.7	-0.15186	-0.0387607	1550	2086	2181.38	1905.08	-0.494956	0.12857	1885	1611	2513.87	2604.83	-0.417411	-0.695147	1	1	1	0.3114	SPAR	NA	NA	NA	REPS_DISAGREE	NA	NA	REPS_DISAGREE	0.8348	SPAR	NA	0.353095	NA	NA	0.944144
Scer_10.161	Spar_10.156	YJL089W	S000003625	SIP4	2171	2171	442	528	272.752	150.858	0.69444	1.80054	202	382	449.512	627.812	-1.15009	-0.715285	111	0	58.4928	660.225	0.912712	-9.369	25	30	85.3607	140.542	-1.73186	-2.19089	0	0	0	NA	NA	NA	NA	NA	NA	NA	NA	NA	NA	NA	NA	NA	NA	NA	NA
Scer_10.162	Spar_10.157	YJL088W	S000003624	ARG3	861	861	2128	2562	7861.19	6461.1	-1.88476	-1.33417	1386	3285	42682	57745.8	-4.94362	-4.13534	449	169	2743.11	811.422	-2.60834	-2.25669	376	696	40855.8	40489.2	-6.75987	-5.86027	1	0	0	0.0002	SPAR	NA	NA	NA	LOW_COV	0.0002	SPAR	NA	NA	NA	LOW_COV	0.000334064	NA	0.000243994	NA
Scer_10.163	Spar_10.158	YJL087C	S000003623	TRL1	2072	2084	18426	21811	42167.4	41446.3	-1.18601	-0.917825	6943	6881	20284.3	31789.1	-1.53827	-2.19935	9464	5788	12227	6368.4	-0.361184	-0.129512	10366	9333	15973.1	15226.5	-0.615408	-0.697785	1	1	1	0.0002	SPAR	NA	0.0002	SCER	NA	0.0002	SPAR	NA	0.0002	SCER	NA	0.000334064	0.000685507	0.000243994	0.000633882
Scer_10.165	Spar_10.160	YJL085W	S000003621	EXO70	1557	1557	15543	14122	18896.2	22306.2	-0.281817	-0.659461	11366	14272	12529.2	18747.6	-0.140555	-0.393496	4496	2559	6795.25	4906.83	-0.595775	-0.938942	5174	4816	8151.95	9407.17	-0.655764	-0.965779	1	1	1	0.0002	SPAR	NA	0.023	SPAR	NA	NA	NA	REPS_DISAGREE	0.0002	SCER	NA	0.000334064	0.0433426	NA	0.000633882
Scer_10.166	Spar_10.161	YJL084C	S000003620	ALY2	2651	2651	16709	19654	17543.4	20716.2	-0.070297	-0.0759328	7695	11036	12307.5	12777	-0.677469	-0.21131	6074	3577	5155.43	3408.98	0.236511	0.0693908	9083	8447	17904.4	15041.8	-0.978997	-0.832391	1	1	1	0.1012	SPAR	NA	0.1512	SCER	NA	0.0002	SPAR	NA	0.6398	SPAR	NA	0.122559	0.223213	0.000243994	0.795028
Scer_10.167	Spar_10.162	YJL083W	S000003619	TAX4	1494	1503	6372	8461	8983.94	9244.03	-0.486871	-0.119015	3885	3996	5453.04	5884.77	-0.480375	-0.549649	2464	2599	1449.21	925.323	0.773992	1.49759	3155	3727	3990.62	2995.6	-0.330211	0.323741	1	1	1	0.101	SPAR	NA	0.0002	SCER	NA	NA	NA	REPS_DISAGREE	0.0106	SPAR	NA	0.122359	0.000685507	NA	0.0240779
Scer_10.168	Spar_10.163	NA	NA	NA	1794	1767	44977	56413	35990.3	46698.5	0.299693	0.250767	24959	31704	35883.9	33302.4	-0.545636	-0.0928364	4743	4607	4356.7	3029.98	0.100658	0.582479	9341	7978	13734.5	12088.3	-0.577989	-0.621331	1	1	1	0.0002	SCER	NA	NA	NA	REPS_DISAGREE	0.0002	SPAR	NA	0.5588	SPAR	NA	0.000334064	NA	0.000243994	0.722711
Scer_10.169	Spar_10.164	YJL081C	S000003617	ARP4	1118	1118	33074	37141	33330.2	32949.6	-0.0111336	0.172746	24410	31013	24783.8	37233.3	-0.0219241	-0.263713	8688	6242	9742.07	4899.78	-0.165187	0.349229	10000	9950	13830.6	14170.6	-0.467821	-0.510089	1	1	1	NA	NA	REPS_DISAGREE	NA	NA	REPS_DISAGREE	0.0002	SPAR	NA	0.1862	SPAR	NA	NA	NA	0.000243994	0.301637
Scer_10.170	Spar_10.165	YJL080C	S000003616	SCP160	2422	2419	166571	182456	170618	186368	-0.0364244	-0.0323966	78401	101519	67534.2	93970.9	0.213462	0.109675	260577	172100	263544	171783	-0.0181234	0.000867709	211258	243810	188752	205180	0.160726	0.247079	1	1	1	0.2142	SPAR	NA	0.6858	SCER	NA	0.0002	SCER	NA	0.8748	SCER	NA	0.248671	0.762896	0.000243994	0.966283
Scer_10.171	Spar_10.166	YJL079C	S000003615	PRY1	731	704	4700	2596	3187.72	3324.83	0.505694	-0.411166	12326	23311	625.333	838.228	4.24445	4.74157	2030	2385	2405.26	2881.81	-0.2989	-0.327176	37027	40621	928.298	985.465	5.26204	5.30955	1	1	1	NA	NA	REPS_DISAGREE	NA	NA	REPS_DISAGREE	0.0002	SCER	NA	0.0002	SCER	NA	NA	NA	0.000243994	0.000633882
Scer_10.175	Spar_10.170	YJL076W	S000003612	NET1	2916	2946	77348	85906	81219.4	92163.4	-0.0556936	-0.0866676	33878	37860	36906.8	47840	-0.108767	-0.322768	36552	27275	37923.5	27004.7	-0.0383731	0.0291342	43643	41535	75281.8	72004.4	-0.77177	-0.778977	1	1	1	0.004	SPAR	NA	0.6436	SCER	NA	0.08	SPAR	NA	0.0746	SPAR	NA	0.00576408	0.724127	0.0838838	0.137841
Scer_10.176	Spar_10.171	YJL074C	S000003610	SMC3	3031	3031	32185	35858	27477.5	33835.9	0.228131	0.0837379	13064	17448	10978	16893.4	0.250964	0.0466004	13451	7164	9303.38	8122.28	0.531839	-0.181095	13017	9844	9925.32	11400.2	0.391177	-0.211723	1	1	1	0.0458	SCER	NA	NA	NA	REPS_DISAGREE	NA	NA	REPS_DISAGREE	NA	NA	REPS_DISAGREE	0.0580531	NA	NA	NA
Scer_10.177	Spar_10.172	YJL073W	S000003609	JEM1	1527	1527	14106	16729	20147.9	23019.8	-0.51429	-0.460498	9040	12142	14805.3	19580.7	-0.711659	-0.689381	5452	3773	6974.76	4456.27	-0.3553	-0.240065	6844	5225	8051.65	11131.2	-0.234414	-1.09096	1	1	1	0.0002	SPAR	NA	0.1508	SCER	NA	0.0002	SPAR	NA	NA	NA	REPS_DISAGREE	0.000334064	0.222762	0.000243994	NA
Scer_10.178	Spar_10.173	YJL072C	S000003608	PSF2	479	479	7311	6323	8355.12	9340.3	-0.192568	-0.562787	6033	10245	6669.93	10075.1	-0.144773	0.02413	3988	1143	4536.22	3524.9	-0.18578	-1.6239	3981	4373	5247.55	3964.38	-0.398426	0.141494	1	1	1	0.0002	SPAR	NA	NA	NA	REPS_DISAGREE	0.0008	SCER	NA	0.1218	SCER	NA	0.000334064	NA	0.000944419	0.211016
Scer_10.179	Spar_10.174	YJL071W	S000003607	ARG2	1621	1609	10818	11591	17710	18393.8	-0.721799	-0.676887	8517	11347	10727.7	14136.5	-0.343604	-0.32781	3665	2755	5073.74	4024.85	-0.479848	-0.557438	3451	2426	5307.3	5988.28	-0.631538	-1.31393	1	1	1	0.0002	SPAR	NA	0.3798	SCER	NA	0.0002	SCER	NA	NA	NA	REPS_DISAGREE	0.000334064	0.478289	0.000243994	NA
Scer_10.180	Spar_10.175	YJL070C	S000003606	NA	2128	2122	9862	12162	12172.7	13929.6	-0.307737	-0.199829	7490	11053	8275.7	9412.03	-0.147971	0.227764	2060	748	2342.74	783.198	-0.189539	-0.070326	3176	2963	3100.73	4317.61	0.0305188	-0.547097	1	0	0	0.0004	SPAR	NA	NA	NA	LOW_COV	0.0004	SCER	NA	NA	NA	LOW_COV	0.000643008	NA	0.000478845	NA
Scer_10.181	Spar_10.176	YJL069C	S000003605	UTP18	1587	1581	61231	56590	64859.3	65593.5	-0.088515	-0.218468	23942	31951	46947.6	68829.2	-0.976943	-1.1126	30854	19127	26675.7	22697.6	0.204458	-0.252384	19655	17832	40134.5	42484.7	-1.03537	-1.25789	1	1	1	0.0004	SPAR	NA	NA	NA	REPS_DISAGREE	0.0002	SPAR	NA	NA	NA	REPS_DISAGREE	0.000643008	NA	0.000243994	NA
Scer_10.182	Spar_10.177	YJL068C	S000003604	NA	737	737	14860	15029	24372.1	20338.1	-0.713758	-0.436408	23256	35696	12905.9	18490.8	0.849518	0.948915	13911	9041	17042.6	10875.1	-0.292898	-0.266443	37704	33336	16203.6	13775.2	1.21835	1.27494	1	1	1	0.0002	SPAR	NA	0.0492	SCER	NA	0.0002	SCER	NA	0.0002	SCER	NA	0.000334064	0.0851816	0.000243994	0.000633882
Scer_10.183	Spar_10.178	YJL066C	S000003602	MPM1	604	604	8223	7234	8425.54	7790.04	-0.0351004	-0.106823	8749	14080	7820.99	10361.9	0.161747	0.442321	3868	3714	3374.43	2674.16	0.19689	0.473735	6708	7053	8463.52	7515.06	-0.33533	-0.0915349	1	1	1	0.4128	SPAR	NA	0.003	SCER	NA	0.0002	SCER	NA	0.0002	SPAR	NA	0.456987	0.0072398	0.000243994	0.000633882
Scer_10.184	Spar_10.179	YJL065C	S000003601	DLS1	361	358	11754	9630	11532.9	9076.3	0.0153517	0.0733827	11925	17769	9882.34	15423.9	0.259001	0.192142	5471	5601	5627.41	2489.7	-0.052698	1.15735	5928	8061	8546.75	8393.76	-0.539794	-0.070391	1	1	1	0.6776	SCER	NA	NA	NA	REPS_DISAGREE	0.0332	SCER	NA	0.1616	SPAR	NA	0.715131	NA	0.0356528	0.268901
Scer_10.185	Spar_10.180	YJL063C	S000003599	MRPL8	640	640	34056	21903	32792.7	25963.5	0.0545342	-0.245345	17139	33753	18668.2	33262.9	-0.123291	0.021102	23042	10807	19555.7	11540.3	0.236662	-0.0947098	15694	17447	22373.1	19903.2	-0.511522	-0.190013	1	1	1	NA	NA	REPS_DISAGREE	0.1694	SCER	NA	NA	NA	REPS_DISAGREE	0.281	SPAR	NA	NA	0.246391	NA	0.426247
Scer_10.187	Spar_10.182	YJL062W	S000003598	LAS21	2098	2098	26984	27128	21107	21462.6	0.354368	0.337947	17144	21573	12939.7	13974.2	0.405871	0.626426	11999	7143	10994.6	6353.28	0.126105	0.169004	22556	16561	10928.3	12965.8	1.04537	0.353058	1	1	1	0.0002	SCER	NA	0.0528	SPAR	NA	0.0066	SCER	NA	NA	NA	REPS_DISAGREE	0.000334064	0.09075	0.00740659	NA
Scer_10.188	Spar_10.183	YJL061W	S000003597	NUP82	1971	1971	41704	44479	36768.9	40535.2	0.181696	0.133946	22970	29491	23289.8	27463.1	-0.0199437	0.102775	13901	9380	11769.1	7105.23	0.24016	0.400657	9656	8370	12744.4	14523	-0.400325	-0.794967	1	1	1	0.0004	SCER	NA	0.5222	SCER	NA	0.0524	SPAR	NA	0.0186	SPAR	NA	0.000643008	0.616269	0.0556671	0.0398952
Scer_10.189	Spar_10.184	YJL060W	S000003596	BNA3	1025	1025	17300	14124	14155.3	11366	0.28941	0.313403	15408	19246	6103.49	8055.92	1.33583	1.25633	7937	4833	8994.78	4859.46	-0.180472	-0.00787457	12482	12772	6365.78	6860.31	0.971329	0.896542	1	1	1	0.0002	SCER	NA	0.0008	SPAR	NA	0.0002	SCER	NA	0.1756	SPAR	NA	0.000334064	0.0023017	0.000243994	0.287404
Scer_10.190	Spar_10.185	YJL059W	S000003595	YHC3	992	989	8066	7528	6295.1	5224.46	0.353203	0.522532	9225	13758	3642	5300.76	1.33621	1.37146	1702	1880	1894.96	1926.24	-0.159223	-0.0394091	3764	3236	1658.13	1991.37	1.17785	0.695805	1	1	1	0.0002	SCER	NA	0.001	SPAR	NA	0.0002	SCER	NA	0.3962	SPAR	NA	0.000334064	0.00279882	0.000243994	0.55737
Scer_10.191	Spar_10.186	YJL058C	S000003594	BIT61	1396	1393	7836	7915	11494.2	10923.3	-0.555767	-0.467804	4868	6709	11669.1	16169.4	-1.26423	-1.27207	2402	2667	2526.28	2942.28	-0.0758541	-0.144772	2628	2323	4654.29	3765.87	-0.827462	-0.69986	1	1	1	0.0002	SPAR	NA	0.0052	SCER	NA	0.0002	SPAR	NA	0.0002	SCER	NA	0.000334064	0.0118821	0.000243994	0.000633882
Scer_10.192	Spar_10.187	YJL057C	S000003593	IKS1	1421	1421	9776	13668	8348.18	8806.35	0.227757	0.634128	10019	13039	6850.95	7790.54	0.548297	0.742964	846	1052	1075.06	793.278	-0.34532	0.40679	2127	1420	1071.28	1458.39	0.98882	-0.0384575	1	0	0	0.0002	SCER	NA	NA	NA	LOW_COV	NA	NA	REPS_DISAGREE	NA	NA	LOW_COV	0.000334064	NA	NA	NA
Scer_10.193	Spar_10.188	YJL056C	S000003592	ZAP1	2104	2113	7398	9404	7590.43	10359.6	-0.0308826	-0.133448	5641	7139	4551.42	4134.46	0.315731	0.794036	1732	1722	1121.45	1811.33	0.632782	-0.0667687	2355	2398	2136.15	2525.18	0.146808	-0.0683644	1	0	0	0.3448	SPAR	NA	NA	NA	LOW_COV	0.0002	SCER	NA	NA	NA	LOW_COV	0.38721	NA	0.000243994	NA
Scer_10.194	Spar_10.189	YJL055W	S000003591	NA	653	653	32071	34356	19601.4	19779.3	0.710283	0.79654	39709	56045	10855.8	17096.1	1.8709	1.71286	19820	13869	9592.81	4577.22	1.04685	1.59911	31653	37660	7710.21	8419.2	2.03736	2.16114	1	1	1	0.0002	SCER	NA	0.0012	SCER	NA	0.0002	SCER	NA	0.0002	SPAR	NA	0.000334064	0.00329234	0.000243994	0.000633882
Scer_10.195	Spar_10.190	YJL054W	S000003590	TIM54	1313	1319	40693	37680	54925.2	51716.6	-0.426101	-0.450239	21980	32570	27443.6	38302.6	-0.313689	-0.227313	8700	10393	15107.3	12434.4	-0.789508	-0.252125	9921	8792	18122.1	15589.8	-0.862548	-0.819689	1	1	1	0.0002	SPAR	NA	NA	NA	REPS_DISAGREE	0.0002	SCER	NA	0.1324	SPAR	NA	0.000334064	NA	0.000243994	0.226611
Scer_10.196	Spar_10.191	YJL053W	S000003589	PEP8	950	950	19400	25068	18937.9	21800	0.0347799	0.20151	18482	27714	12513.6	17451.6	0.562588	0.667222	10114	6416	8931.24	5038.88	0.179402	0.34851	14707	12373	9385.41	8433.38	0.647955	0.552958	1	1	1	0.2006	SCER	NA	0.1188	SCER	NA	0.0002	SCER	NA	0.0002	SPAR	NA	0.233811	0.182206	0.000243994	0.000633882
Scer_10.198	Spar_10.193	YJL052W	S000003588	TDH1	155	301	1846	398	3565.61	2551.69	0.00812727	-1.72006	6430	9521	3143.99	2985.33	1.98948	2.63039	1071	217	1474.42	1472.65	0.496673	-1.7995	14954	18339	2699.53	2098.54	3.42681	4.08434	0	0	0	NA	NA	NA	NA	NA	NA	NA	NA	NA	NA	NA	NA	NA	NA	NA	NA
Scer_10.199	Spar_10.194	YJL051W	S000003587	IRC8	2024	2000	20485	22668	20128.1	25098	0.00814856	-0.16412	11068	11612	14918.8	19540.3	-0.447911	-0.767997	5143	4278	2313.49	3051.15	1.13499	0.47024	3896	4120	7748.62	8332.46	-1.00897	-1.03313	1	1	1	NA	NA	REPS_DISAGREE	0.0002	SCER	NA	0.0002	SPAR	NA	0.573	SPAR	NA	NA	0.000685507	0.000243994	0.73648
Scer_10.201	Spar_10.196	YJL049W	S000003585	NA	1225	1330	15901	18344	11579.5	9694.62	0.57615	1.03863	16031	20356	8981.58	14334	0.954397	0.624623	3029	2755	2306.43	946.49	0.511675	1.65904	2855	2612	3036.71	2761.64	0.029657	0.0383049	1	1	1	0.0002	SCER	NA	NA	NA	REPS_DISAGREE	NA	NA	REPS_DISAGREE	0.728	SPAR	NA	0.000334064	NA	NA	0.870885
Scer_10.202	Spar_10.197	YJL048C	S000003584	UBX6	1089	1113	12298	15640	13275.6	19126.2	-0.0788907	-0.258846	14327	19885	17647.9	20858.7	-0.269291	-0.0375123	1896	2037	3164.66	3829.3	-0.707337	-0.878855	3649	3615	7375.17	6899.93	-0.983526	-0.900946	1	1	1	0.0206	SPAR	NA	0.0002	SPAR	NA	NA	NA	REPS_DISAGREE	NA	NA	REPS_DISAGREE	0.0273471	0.000685507	NA	NA
Scer_10.204	Spar_10.199	YJL047C	S000003583	RTT101	2256	2256	13818	15526	17074.2	20024.4	-0.305253	-0.367055	10428	12249	9486.53	12973.6	0.136497	-0.0829127	2939	1614	3132.39	2329.43	-0.0919077	-0.529065	4551	3508	3606.49	4503.61	0.335504	-0.360344	1	1	1	0.0002	SPAR	NA	NA	NA	REPS_DISAGREE	0.0002	SCER	NA	NA	NA	REPS_DISAGREE	0.000334064	NA	0.000243994	NA
Scer_10.205	Spar_10.200	YJL046W	S000003582	AIM22	1174	1177	18077	21650	17042.5	14978.6	0.0886949	0.535114	10345	15283	10167.3	14817.6	0.0286779	0.0482979	3828	2667	2722.94	2285.08	0.494955	0.226562	3055	2239	2874.52	3701.65	0.091502	-0.721376	1	1	1	0.0022	SCER	NA	NA	NA	REPS_DISAGREE	0.084	SPAR	NA	0.0246	SPAR	NA	0.00326139	NA	0.0879577	0.0512944
Scer_10.227	Spar_10.227	YJL036W	S000003573	SNX4	1085	1085	17365	17464	16645.8	21410.9	0.0610227	-0.293949	15516	20796	13011.6	18244.3	0.25394	0.188847	5141	3306	5681.87	4651.81	-0.144289	-0.49258	6075	6816	7102.01	8392.51	-0.22531	-0.300138	1	1	1	NA	NA	REPS_DISAGREE	0.1118	SPAR	NA	0.0002	SCER	NA	0.3748	SPAR	NA	NA	0.173495	0.000243994	0.531987
Scer_10.228	Spar_10.228	YJL035C	S000003572	TAD2	500	503	5037	5225	15132.3	13429.4	-1.57817	-1.35309	4290	5184	4638.9	9321.85	-0.104148	-0.837797	1594	764	5297.63	2984.62	-1.72343	-1.95587	1174	2072	3523.26	3646.18	-1.57603	-0.806431	1	1	1	0.0002	SPAR	NA	0.1886	SPAR	NA	0.0002	SCER	NA	0.0002	SCER	NA	0.000334064	0.269836	0.000243994	0.000633882
Scer_10.229	Spar_10.229	NA	NA	NA	1109	1123	250702	248084	323758	298081	-0.350843	-0.246776	119174	138004	174201	256554	-0.529582	-0.876452	135711	95331	158594	122224	-0.206701	-0.340412	148002	157021	214983	231699	-0.520506	-0.543193	1	1	1	0.0002	SPAR	NA	NA	NA	REPS_DISAGREE	0.0002	SPAR	NA	0.0002	SCER	NA	0.000334064	NA	0.000243994	0.000633882
Scer_10.23	Spar_10.23	YJL210W	S000003746	PEX2	775	775	13190	14459	12556.5	11662.7	0.0710061	0.310039	14046	23938	8293.89	12136.3	0.759967	0.979919	2220	1665	2526.28	1384.96	-0.186378	0.265502	4602	3235	2200.17	1210.67	1.0643	1.41722	1	1	1	0.0598	SCER	NA	0.7292	SPAR	NA	0.0002	SCER	NA	0.1596	SCER	NA	0.0746117	0.798776	0.000243994	0.266396
Scer_10.230	Spar_10.230	YJL033W	S000003570	HCA4	1560	1560	64450	60470	56350.5	48078.1	0.19375	0.330833	23031	23178	34246.1	48032.4	-0.572341	-1.05122	36545	31019	27504.7	16374.6	0.409982	0.921652	21919	17610	29776	31884	-0.441949	-0.856399	1	1	1	0.0002	SCER	NA	0.0002	SCER	NA	0.0002	SPAR	NA	0.9534	SPAR	NA	0.000334064	0.000685507	0.000243994	0.998057
Scer_10.232	Spar_10.232	YJL030W	S000003567	MAD2	431	431	7665	7616	7857.23	6898.78	-0.0357298	0.142672	7766	11642	7406.99	9781.33	0.0682752	0.251213	2958	1392	3364.34	763.039	-0.185644	0.866478	3267	3168	4827.15	3715.41	-0.563063	-0.229881	1	0	0	NA	NA	REPS_DISAGREE	NA	NA	LOW_COV	NA	NA	REPS_DISAGREE	NA	NA	LOW_COV	NA	NA	NA	NA
Scer_10.233	Spar_10.233	YJL029C	S000003566	VPS53	1995	1995	35989	44742	33295.5	34227.9	0.112225	0.386446	21116	27799	20692.3	24343.8	0.0292423	0.19147	8427	7447	6396.89	5360.42	0.397594	0.474237	9891	7745	7887.33	10064	0.326542	-0.377825	1	1	1	0.0002	SCER	NA	0.2572	SCER	NA	NA	NA	REPS_DISAGREE	0.42	SPAR	NA	0.000334064	0.348983	NA	0.583538
Scer_10.237	Spar_10.238	YJL026W	S000003563	RNR2	472	472	37114	36446	59518.3	61284.1	-0.681356	-0.749737	40273	58242	71234.3	101035	-0.822743	-0.79471	40614	33834	67110.4	53815.9	-0.724545	-0.669543	80650	73777	156101	154262	-0.952728	-1.06413	1	1	1	0.0002	SPAR	NA	NA	NA	REPS_DISAGREE	0.2322	SPAR	NA	0.0002	SCER	NA	0.000334064	NA	0.23818	0.000633882
Scer_10.238	Spar_10.239	YJL025W	S000003562	RRN7	1360	1363	9775	12788	8598.12	8416.3	0.188234	0.606653	5062	6396	8462.78	11421.7	-0.738131	-0.833259	1453	693	967.148	1234.77	0.589907	-0.829226	1262	1168	2599.23	2321.24	-1.03861	-0.987066	1	0	0	0.0002	SCER	NA	NA	NA	LOW_COV	0.0002	SPAR	NA	NA	NA	LOW_COV	0.000334064	NA	0.000243994	NA
Scer_10.239	Spar_10.240	YJL024C	S000003561	APS3	451	451	13021	10451	11092.6	12193.7	0.231229	-0.222476	10942	16057	6333.01	9921.32	0.788817	0.694543	5080	4215	3978.52	2152.03	0.352519	0.969506	6327	8428	3666.24	3458.1	0.787053	1.28497	1	1	1	NA	NA	REPS_DISAGREE	0.364	SCER	NA	0.0002	SCER	NA	0.003	SPAR	NA	NA	0.464075	0.000243994	0.00754622
Scer_10.24	Spar_10.24	YJL209W	S000003745	CBP1	1666	1666	17819	25736	18213.8	24354.7	-0.0316177	0.0795867	11664	15427	14344.5	19175.3	-0.298417	-0.313775	1954	1581	1956.48	954.554	-0.00183075	0.72734	1329	1375	1909.95	2935.54	-0.522861	-1.09364	1	0	0	NA	NA	REPS_DISAGREE	NA	NA	LOW_COV	0.0002	SPAR	NA	NA	NA	LOW_COV	NA	NA	0.000243994	NA
Scer_10.241	Spar_10.248	YJL023C	S000003560	PET130	981	981	8592	8989	10144.4	7663	-0.239588	0.230224	7265	10745	9940.37	12345.8	-0.452283	-0.200341	979	785	2879.26	1590.59	-1.55534	-1.01787	894	1267	2166.03	2795	-1.27576	-1.14081	1	0	0	NA	NA	REPS_DISAGREE	NA	NA	LOW_COV	NA	NA	REPS_DISAGREE	NA	NA	LOW_COV	NA	NA	NA	NA
Scer_10.242	Spar_10.249	YJL020C	S000003557	BBC1	2926	2837	56291	63787	49401.7	59038.1	0.143775	0.0670496	32486	40998	25525.2	29093.2	0.303321	0.450293	49361	31479	39538.1	27328.3	0.275558	0.159425	76025	93031	89123	74512.1	-0.273885	0.275669	1	1	1	0.0214	SCER	NA	0.0634	SCER	NA	0.0002	SCER	NA	0.0002	SPAR	NA	0.0283554	0.105891	0.000243994	0.000633882
Scer_10.243	Spar_10.250	YJL019W	S000003556	MPS3	1532	1535	11088	10189	8951.21	9889.15	0.311636	0.0459121	7213	7431	4848.5	5554.98	0.575787	0.422532	5366	3683	3558.98	1921.2	0.595068	0.941334	6849	8751	4886.9	3628.25	0.489711	1.27276	1	1	1	0.5138	SCER	NA	0.0004	SCER	NA	0.0002	SCER	NA	0.3484	SPAR	NA	0.555811	0.00125798	0.000243994	0.501651
Scer_10.244	Spar_10.251	YJL016W	S000003553	NA	1355	1355	16954	17687	7747.13	7969.68	1.12979	1.15	10770	14581	5617.6	6169.05	0.938869	1.24083	2272	2056	676.701	874.924	1.74588	1.23166	2210	2609	1485.28	1490.92	0.572996	0.806882	1	0	0	0.0002	SCER	NA	NA	NA	LOW_COV	NA	NA	REPS_DISAGREE	NA	NA	LOW_COV	0.000334064	NA	NA	NA
Scer_10.246	Spar_10.253	YJL014W	S000003551	CCT3	1013	1016	97217	93179	87493.7	79604.5	0.156294	0.231419	49254	66186	44327.6	69542	0.156298	-0.0670913	70875	40778	73315.6	40573.1	-0.0445774	0.0115338	56978	65023	63990.7	70971.9	-0.163188	-0.122029	1	1	1	0.0002	SCER	NA	0.0024	SPAR	NA	NA	NA	REPS_DISAGREE	0.9952	SPAR	NA	0.000334064	0.00596219	NA	1
Scer_10.247	Spar_10.254	YJL013C	S000003550	MAD3	1330	1297	10463	8675	14310	15220.8	-0.487941	-0.847284	9607	14119	11974	19190.8	-0.353965	-0.478996	1460	736	1949.42	2010.91	-0.453079	-1.48508	1920	1186	3469.91	4153.72	-0.889706	-1.84368	1	0	0	0.0002	SPAR	NA	NA	NA	LOW_COV	0.0238	SCER	NA	NA	NA	LOW_COV	0.000334064	NA	0.0257567	NA
Scer_10.248	Spar_10.255	YJL012C	S000003549	VTC4	1472	1472	104606	107212	96835.7	106791	0.111353	0.00568016	133242	175710	28399.8	34680.8	2.23006	2.34095	55780	42223	60709.4	39581.2	-0.122171	0.0932099	184772	165285	37341.1	40324.4	2.30688	2.0352	1	1	1	0.8426	SCER	NA	NA	NA	REPS_DISAGREE	0.0002	SCER	NA	NA	NA	REPS_DISAGREE	0.864547	NA	0.000243994	NA
Scer_10.249	Spar_10.256	YJL011C	S000003548	RPC17	417	417	12299	12013	10807.9	10792.3	0.186438	0.154579	7937	10842	7615.72	13646.1	0.059605	-0.331832	5336	3596	6005.59	4323.21	-0.170518	-0.265644	3861	5552	5968.85	5582.91	-0.628347	-0.00800918	1	1	1	0.0336	SCER	NA	0.004	SPAR	NA	0.0002	SPAR	NA	NA	NA	REPS_DISAGREE	0.0435013	0.00935707	0.000243994	NA
Scer_10.25	Spar_10.25	YJL208C	S000003744	NUC1	754	754	31266	30382	53233.2	43266.5	-0.767711	-0.51002	10532	14495	30486.3	44752.4	-1.53329	-1.62634	15439	10748	14599	9291.53	0.0807054	0.210059	7405	6533	20729.9	20481.7	-1.48501	-1.64837	1	1	1	0.0002	SPAR	NA	0.0002	SCER	NA	0.0002	SPAR	NA	0.438	SPAR	NA	0.000334064	0.000685507	0.000243994	0.600189
Scer_10.252	Spar_10.259	YJL010C	S000003547	NOP9	1469	1469	52374	51174	50823	52987.9	0.0433676	-0.0502521	21320	23593	29045.1	46701.2	-0.446068	-0.985069	28254	17812	26337.9	18345.2	0.101312	-0.0425493	19833	14714	23152	26234.7	-0.223222	-0.834245	1	1	1	NA	NA	REPS_DISAGREE	0.905	SCER	NA	0.0002	SPAR	NA	NA	NA	REPS_DISAGREE	NA	0.935255	0.000243994	NA
Scer_10.253	Spar_10.260	YJL008C	S000003545	CCT8	1118	1118	128419	134596	102873	95667.9	0.319992	0.492524	59645	75046	67045.7	105934	-0.168742	-0.49732	66606	47394	62932.2	47254	0.0818531	0.00426901	56650	59855	72607.9	77537.3	-0.358044	-0.373413	1	1	1	0.0002	SCER	NA	0.001	SPAR	NA	0.0002	SPAR	NA	0.2576	SPAR	NA	0.000334064	0.00279882	0.000243994	0.395202
Scer_10.256	Spar_10.264	YJL006C	S000003543	CTK2	749	749	9419	12258	11409.9	17083.7	-0.276619	-0.478863	8674	14417	8638.6	12178.4	0.00589888	0.243433	2345	2426	2344.75	2813.26	0.000151641	-0.213584	4170	2890	2225.78	3375.94	0.905433	-0.224147	1	1	1	0.0002	SPAR	NA	0.0402	SCER	NA	0.0002	SCER	NA	NA	NA	REPS_DISAGREE	0.000334064	0.0713226	0.000243994	NA
Scer_10.258	Spar_10.266	YJL005W	S000003542	CYR1	4599	4629	30726	50075	40649.9	60356.2	-0.3944	-0.260025	20652	20576	24253.7	32886.7	-0.222535	-0.667135	7393	4480	8232.35	8370.24	-0.145745	-0.89224	16031	12691	17193.8	16168.6	-0.0916366	-0.339988	1	1	1	0.0002	SPAR	NA	NA	NA	REPS_DISAGREE	NA	NA	REPS_DISAGREE	0.0002	SCER	NA	0.000334064	NA	NA	0.000633882
Scer_10.259	Spar_10.267	YJL004C	S000003541	SYS1	510	510	17856	16738	14173.2	12724.7	0.333226	0.39547	15808	20915	8431.6	11615.8	0.906696	0.848393	4851	3355	4218.54	4426.03	0.201494	-0.399595	6522	5993	1973.97	3102.36	1.72371	0.949688	1	1	1	0.0002	SCER	NA	0.0856	SPAR	NA	0.0002	SCER	NA	0.0004	SCER	NA	0.000334064	0.137343	0.000243994	0.00118809
Scer_10.26	Spar_10.26	YJL207C	S000003743	LAA1	5036	5036	52865	61788	44387.1	57183.2	0.252168	0.111734	21942	25639	16322.7	21996.6	0.426788	0.221049	10579	5797	10308.8	9455.83	0.0373167	-0.705802	15435	8952	12319.7	16089.4	0.325216	-0.845757	1	1	1	0.0006	SCER	NA	0.0002	SPAR	NA	NA	NA	REPS_DISAGREE	NA	NA	REPS_DISAGREE	0.000945863	0.000685507	NA	NA
Scer_10.260	Spar_10.268	YJL003W	S000003540	COX16	283	283	4917	5461	7105.42	5291.95	-0.531052	0.0453584	4162	6059	3171.7	6396.64	0.391911	-0.0782224	2709	542	1683.18	2211.5	0.686247	-2.02665	2763	4171	3034.57	2642.36	-0.135212	0.658364	1	0	0	NA	NA	REPS_DISAGREE	NA	NA	LOW_COV	NA	NA	REPS_DISAGREE	NA	NA	LOW_COV	NA	NA	NA	NA
Scer_10.261	Spar_10.269	YJL002C	S000003539	OST1	1302	1302	95394	100724	104185	110252	-0.127178	-0.13039	75404	101349	49978.1	69103.1	0.593334	0.552502	50772	30396	61203.6	35965.6	-0.269579	-0.24273	83373	71085	42853.2	52993.3	0.96016	0.423729	1	1	1	0.0002	SPAR	NA	0.1996	SPAR	NA	0.0002	SCER	NA	0.0004	SCER	NA	0.000334064	0.282836	0.000243994	0.00118809
Scer_10.262	Spar_10.270	YJL001W	S000003538	PRE3	484	484	51311	55433	61849.1	58070.5	-0.26948	-0.0670585	47384	76762	42868.2	69500.8	0.144488	0.143361	25577	16742	30575.6	18754.4	-0.257524	-0.16375	33973	41790	38363.3	37820.5	-0.175332	0.143985	1	1	1	0.1898	SPAR	NA	NA	NA	REPS_DISAGREE	0.0002	SCER	NA	NA	NA	REPS_DISAGREE	0.221961	NA	0.000243994	NA
Scer_10.263	Spar_10.271	YJR001W	S000003761	AVT1	1436	1436	51131	53685	45825.2	49773.3	0.158053	0.109146	35704	44066	35212.7	48290.9	0.0199912	-0.132082	18162	11443	13172	8393.42	0.463422	0.447088	27693	23130	16397.8	19259.7	0.755983	0.264165	1	1	1	0.0066	SCER	NA	0.0002	SCER	NA	0.0002	SPAR	NA	NA	NA	REPS_DISAGREE	0.00929301	0.000685507	0.000243994	NA
Scer_10.264	Spar_10.272	YJR002W	S000003762	MPP10	1382	1385	71063	69361	73226.3	78665.6	-0.0401351	-0.178477	29281	32902	41387.2	65276.1	-0.496076	-0.985231	21775	20051	22989.7	18998.4	-0.0751816	0.0809244	23253	23335	28856.2	35694.9	-0.308324	-0.610071	1	1	1	0.098	SPAR	NA	NA	NA	REPS_DISAGREE	0.0002	SPAR	NA	0.0002	SCER	NA	0.119053	NA	0.000243994	0.000633882
Scer_10.265	Spar_10.273	YJR003C	S000003763	NA	1348	1348	30649	29852	37144.8	41537.6	-0.277312	-0.476577	16705	23480	33357.4	44242.3	-0.997686	-0.913965	9463	5882	11288.1	7836.01	-0.254408	-0.413752	6850	4573	14338.5	16673.3	-1.06561	-1.86609	1	1	1	0.0002	SPAR	NA	0.7652	SCER	NA	0.0002	SPAR	NA	NA	NA	REPS_DISAGREE	0.000334064	0.829756	0.000243994	NA
Scer_10.266	Spar_10.274	YJR004C	S000003764	SAG1	1838	1779	9603	7643	9558.2	11450.3	-0.0403254	-0.630186	115993	156189	5630.59	6449.03	4.31729	4.55078	126	92	0	0	6.94161	6.49209	273146	241804	661.546	430.385	8.64037	9.08358	1	0	0	0.162	SPAR	NA	NA	NA	LOW_COV	0.0002	SCER	NA	NA	NA	LOW_COV	0.191236	NA	0.000243994	NA
Scer_10.267	Spar_10.275	YJR005W	S000003765	APL1	1622	1703	35273	44669	28811.5	32394.8	0.362216	0.533804	22594	29763	20364	25048.9	0.220214	0.319066	5530	4859	6360.58	4065.17	-0.131541	0.32759	7766	6269	6387.12	8488.85	0.352271	-0.366969	1	1	1	0.0002	SCER	NA	0.0472	SPAR	NA	0.0002	SPAR	NA	0.564	SPAR	NA	0.000334064	0.0820794	0.000243994	0.72769
Scer_10.27	Spar_10.27	YJL206C	S000003741	NA	1878	1881	8151	10255	7606.3	7548.86	0.102073	0.444248	5475	5989	4226.63	4719.33	0.375577	0.345972	2497	888	2439.55	621.922	0.0358687	0.515435	2233	1522	1444.73	1581.42	0.630133	-0.0529096	1	0	0	0.0018	SCER	NA	NA	NA	LOW_COV	NA	NA	REPS_DISAGREE	NA	NA	LOW_COV	0.00270386	NA	NA	NA
Scer_10.270	Spar_10.277	YJR006W	S000003766	POL31	1224	1224	26861	28744	36700.5	29762.7	-0.45027	-0.0502443	18238	24552	26731.7	39566.8	-0.551578	-0.688426	5193	5250	11087.4	5357.4	-1.09413	-0.0292095	7212	5806	12437.1	12851.5	-0.78609	-1.14618	1	1	1	0.236	SPAR	NA	NA	NA	REPS_DISAGREE	0.0002	SPAR	NA	NA	NA	REPS_DISAGREE	0.271729	NA	0.000243994	NA
Scer_10.271	Spar_10.278	YJR007W	S000003767	SUI2	464	464	87492	85021	90748.9	94672.4	-0.0527283	-0.155123	44939	57858	57865.8	90240.1	-0.364736	-0.641243	63442	39771	62684.1	40632.6	0.0173388	-0.0309187	36452	44571	43536.1	50983.1	-0.256208	-0.193911	1	1	1	0.1828	SPAR	NA	0.3534	SCER	NA	0.0002	SPAR	NA	0.0004	SCER	NA	0.21449	0.452758	0.000243994	0.00118809
Scer_10.272	Spar_10.279	YJR008W	S000003768	MHO1	762	765	4627	7929	8307.51	10367.5	-0.838533	-0.38115	10395	13981	7053.62	9740.11	0.565058	0.527082	224	268	2339.71	1662.15	-3.37328	-2.62258	964	801	2522.41	2164.85	-1.38111	-1.42759	1	0	0	0.0002	SPAR	NA	NA	NA	LOW_COV	0.0002	SCER	NA	NA	NA	LOW_COV	0.000334064	NA	0.000243994	NA
Scer_10.274	Spar_10.281	YJR010W	S000003771	MET3	962	962	8192	7657	5616.7	4781.81	0.544413	0.67911	7570	10734	4396.39	5890.78	0.783838	0.865546	1450	314	431.636	98.7817	1.74582	1.6585	1654	1743	612.463	523.385	1.43178	1.7337	1	0	0	0.0002	SCER	NA	NA	NA	LOW_COV	0.059	SCER	NA	NA	NA	LOW_COV	0.000334064	NA	0.0624191	NA
Scer_10.276	Spar_10.283	YJR011C	S000003772	NA	586	583	5371	5403	5662.32	6127.62	-0.0835938	-0.18894	4916	7806	3881.05	5524.92	0.333555	0.491149	1262	301	663.59	215.707	0.918912	0.471397	1416	891	1030.73	777.362	0.450368	0.189197	1	0	0	0.0718	SPAR	NA	NA	NA	LOW_COV	0.0002	SCER	NA	NA	NA	LOW_COV	0.088888	NA	0.000243994	NA
Scer_10.278	Spar_10.285	YJR013W	S000003774	GPI14	989	989	15524	15931	24184.6	21352.4	-0.639557	-0.422537	15336	19207	15266.1	24249.4	0.00659102	-0.336298	3170	2525	9130.92	5083.23	-1.52598	-1.00917	7718	5046	5751.18	8572.26	0.424305	-0.764417	1	1	1	0.0002	SPAR	NA	0.0002	SPAR	NA	0.0002	SCER	NA	0.0002	SCER	NA	0.000334064	0.000685507	0.000243994	0.000633882
Scer_10.279	Spar_10.286	YJR014W	S000003775	TMA22	520	523	56885	55123	54126.8	47753.6	0.0800034	0.215341	41986	59978	31171.4	58489.6	0.437974	0.0445522	57819	33865	37642.1	26233.6	0.627482	0.376666	45197	48755	37121.3	38219.2	0.292274	0.359544	1	1	1	0.0172	SCER	NA	0.107	SCER	NA	NA	NA	REPS_DISAGREE	0.0012	SPAR	NA	0.0230077	0.167033	NA	0.00326876
Scer_10.30	Spar_10.29	YJL204C	S000003740	RCY1	2182	2182	16102	21514	15958.4	15428.2	0.0129192	0.479677	12399	15466	9116.7	10897.8	0.443599	0.505021	6115	3354	4206.44	3770.84	0.539647	-0.168957	6386	6253	3811.36	6533.35	0.744455	-0.0632639	1	1	1	0.6776	SCER	NA	NA	NA	REPS_DISAGREE	NA	NA	REPS_DISAGREE	NA	NA	REPS_DISAGREE	0.715131	NA	NA	NA
Scer_10.306	Spar_10.295	NA	NA	NA	3821	3824	30699	38299	27749.2	28823.8	0.146871	0.411164	18427	21305	12951.8	17626.8	0.509763	0.274537	7994	3935	7776.51	3863.58	0.0409213	0.0275524	14392	10588	9037.57	11102.9	0.672333	-0.0673619	1	1	1	0.0002	SCER	NA	0.0912	SPAR	NA	NA	NA	REPS_DISAGREE	NA	NA	REPS_DISAGREE	0.000334064	0.14544	NA	NA
Scer_10.307	Spar_10.296	YJR032W	S000003793	CPR7	1076	1076	25464	28767	23561.8	24741.7	0.112007	0.21746	17698	19578	16059.5	22685.4	0.140155	-0.212521	14105	8847	15418.9	14072.4	-0.128484	-0.669544	11101	13147	15433.2	18722.2	-0.475313	-0.509982	1	1	1	0.0006	SCER	NA	0.0002	SPAR	NA	NA	NA	REPS_DISAGREE	0.5778	SPAR	NA	0.000945863	0.000685507	NA	0.74053
Scer_10.308	Spar_10.297	YJR033C	S000003794	RAV1	3337	3346	17350	21317	18493.5	27055.2	-0.0881951	-0.340003	12929	15308	12983.9	15046.9	-0.00222538	0.0287056	4530	3175	6539.09	5960.17	-0.525595	-0.904498	10907	7301	10014.9	10688.7	0.126973	-0.545977	1	1	1	0.0002	SPAR	NA	0.0002	SPAR	NA	0.0002	SCER	NA	0.0002	SCER	NA	0.000334064	0.000685507	0.000243994	0.000633882
Scer_10.309	Spar_10.298	YJR034W	S000003795	PET191	271	271	4802	3548	3424.77	2631.09	0.487509	0.431206	4982	7994	2391.34	3481.74	1.05859	1.19888	3915	551	1995.81	806.382	0.971681	-0.548582	4223	4812	1530.09	1942.57	1.46405	1.30823	1	0	0	0.0002	SCER	NA	NA	NA	LOW_COV	0.0002	SCER	NA	NA	NA	LOW_COV	0.000334064	NA	0.000243994	NA
Scer_10.31	Spar_10.30	YJL203W	S000003739	PRP21	749	764	11292	10916	11205.6	10513.4	0.039684	0.0828134	10272	13692	7303.92	11926.7	0.520523	0.227728	5453	4053	4842.8	1516	0.199783	1.44673	5592	6269	5411.87	4940.67	0.0758351	0.372073	1	1	1	0.3426	SCER	NA	0.0154	SCER	NA	0.0002	SCER	NA	0.0002	SPAR	NA	0.384986	0.0306059	0.000243994	0.000633882
Scer_10.310	Spar_10.299	YJR035W	S000003796	RAD26	2542	2539	11479	12759	12508.9	18548.6	-0.125649	-0.541464	6786	7790	7648.64	9697.16	-0.174321	-0.317607	2828	1819	2938.76	1585.55	-0.0571087	0.196344	2737	2309	2424.25	2920.95	0.173288	-0.340741	1	1	1	0.0002	SPAR	NA	0.345	SCER	NA	NA	NA	REPS_DISAGREE	NA	NA	REPS_DISAGREE	0.000334064	0.443679	NA	NA
Scer_10.311	Spar_10.300	YJR036C	S000003797	HUL4	2167	2164	4314	6053	6308	8274.37	-0.550049	-0.452934	3762	5979	3603.03	4640.31	0.0602751	0.363614	234	499	565.766	185.468	-1.27209	1.421	222	419	275.288	326.125	-0.31113	0.358548	1	0	0	0.0002	SPAR	NA	NA	NA	LOW_COV	0.0002	SCER	NA	NA	NA	LOW_COV	0.000334064	NA	0.000243994	NA
Scer_10.313	Spar_10.302	YJR039W	S000003800	NA	3180	3189	13765	18870	10873.4	15483.8	0.344256	0.289395	7827	10761	6798.11	8536.87	0.207374	0.338075	1477	523	970.173	732.799	0.609923	-0.481741	1779	1391	915.494	1109.33	0.961757	0.330253	1	0	0	0.0002	SCER	NA	NA	NA	LOW_COV	NA	NA	REPS_DISAGREE	NA	NA	LOW_COV	0.000334064	NA	NA	NA
Scer_10.314	Spar_10.303	YJR040W	S000003801	GEF1	1894	1885	23889	24300	31828.6	40730.7	-0.420835	-0.752009	15933	19534	18534.8	22284.3	-0.225078	-0.196905	8413	5650	8238.4	6174.87	0.0233799	-0.135007	12817	10054	6139.57	9189.47	1.05485	0.12283	1	1	1	0.0002	SPAR	NA	0.0002	SCER	NA	0.0002	SCER	NA	0.022	SCER	NA	0.000334064	0.000685507	0.000243994	0.0465212
Scer_10.315	Spar_10.304	YJR041C	S000003802	URB2	3050	3158	46833	52866	53641.8	59649.5	-0.145626	-0.123965	15962	17744	28166.8	35666.8	-0.769115	-0.957007	18297	11857	14572.8	9801.57	0.378514	0.324831	14127	10087	16585.6	23380.5	-0.181258	-1.16253	1	1	1	0.0002	SPAR	NA	0.0002	SCER	NA	0.0002	SPAR	NA	NA	NA	REPS_DISAGREE	0.000334064	0.000685507	0.000243994	NA
Scer_10.316	Spar_10.305	YJR042W	S000003803	NUP85	1597	1597	56766	57994	63355.7	63424.9	-0.158445	-0.129145	29368	34900	36679.8	52924.3	-0.320733	-0.600689	14810	11111	15576.2	9368.14	-0.0727689	0.24613	13608	11751	16939.8	19130.5	-0.315944	-0.70304	1	1	1	0.0004	SPAR	NA	0.104	SCER	NA	0.0002	SPAR	NA	NA	NA	REPS_DISAGREE	0.000643008	0.16332	0.000243994	NA
Scer_10.317	Spar_10.306	YJR043C	S000003804	POL32	1017	1020	13765	15849	14065.1	13023.4	-0.0268585	0.287512	10710	14952	9498.65	14261.9	0.177396	0.0724171	7497	4198	5394.45	3698.27	0.479013	0.187056	7694	6388	7936.42	7367.43	-0.0404986	-0.201517	1	1	1	NA	NA	REPS_DISAGREE	NA	NA	REPS_DISAGREE	NA	NA	REPS_DISAGREE	0.7894	SPAR	NA	NA	NA	NA	0.912402
Scer_10.32	Spar_10.32	YJL201W	S000003737	ECM25	1296	1293	22271	22968	23323.7	23713.5	-0.0699724	-0.0494258	17782	25450	13819.7	16831.5	0.360326	0.593125	4468	3255	7191.59	6103.3	-0.689902	-0.910069	9329	6219	7562.96	7763.62	0.299391	-0.323343	1	1	1	0.3048	SPAR	NA	0.0002	SPAR	NA	0.0002	SCER	NA	NA	NA	REPS_DISAGREE	0.346059	0.000685507	0.000243994	NA
Scer_10.320	Spar_10.309	YJR044C	S000003805	VPS55	297	309	12474	10271	13654.4	12734.6	-0.0732917	-0.253007	10279	16229	10526.7	14245.6	0.0227903	0.245191	8700	3024	12464	6863.32	-0.461486	-1.12504	13580	12217	11096.9	11650	0.348447	0.125697	1	1	1	0.3542	SPAR	NA	0.0016	SPAR	NA	0.0024	SCER	NA	0.0464	SCER	NA	0.396623	0.00418584	0.0027641	0.0905153
Scer_10.321	Spar_10.310	NA	NA	NA	1089	1042	297966	286041	296861	301446	-0.0582874	-0.139328	102105	141187	116708	160884	-0.256494	-0.252061	430912	276103	470024	254893	-0.188989	0.0516646	384115	455034	431906	415680	-0.232828	0.0668522	1	1	1	0.0524	SPAR	NA	NA	NA	REPS_DISAGREE	0.0004	SPAR	NA	0.0692	SCER	NA	0.0659183	NA	0.000478845	0.129103
Scer_10.322	Spar_10.311	YJR046W	S000003807	TAH11	1306	1306	31790	24783	26790.1	25391.8	0.246862	-0.0350111	16750	24447	12875.6	17534.1	0.379493	0.479472	6790	6079	6173	5064.08	0.137417	0.263487	8077	7917	6839.53	8173.57	0.23989	-0.046006	1	1	1	NA	NA	REPS_DISAGREE	NA	NA	REPS_DISAGREE	0.0002	SCER	NA	0.1306	SPAR	NA	NA	NA	0.000243994	0.223957
Scer_10.325	Spar_10.315	YJR048W	S000003809	CYC1	204	248	68180	66883	77617.1	69992.2	0.0947468	0.216217	8284	13891	56394.3	94668.2	-2.48523	-2.48687	76642	51835	140971	67292.5	-0.597408	-0.0947428	14258	10419	87810.6	87256.4	-2.34077	-2.78415	1	1	1	0.0666	SCER	NA	0.0442	SPAR	NA	0.0002	SPAR	NA	0.003	SCER	NA	0.08286	0.0775467	0.000243994	0.00754622
Scer_10.326	Spar_10.316	YJR049C	S000003810	UTR1	1270	1267	25250	26610	19061.9	20541.5	0.402164	0.369997	22489	28317	14349.7	20811.4	0.644746	0.440863	9490	8387	7864.25	4862.48	0.267655	0.782926	11966	10372	8787.89	8877.53	0.441897	0.221029	1	1	1	0.0002	SCER	NA	NA	NA	REPS_DISAGREE	0.0388	SCER	NA	0.0002	SPAR	NA	0.000334064	NA	0.0415792	0.000633882
Scer_10.327	Spar_10.317	YJR050W	S000003811	ISY1	596	596	9668	12555	11345.5	14166.8	-0.230805	-0.174236	9147	11829	7879.02	14105.6	0.215257	-0.253919	2967	3593	4829.69	4043	-0.702738	-0.170191	4537	4659	5311.57	4320.95	-0.227354	0.108647	1	1	1	0.0146	SPAR	NA	NA	NA	REPS_DISAGREE	NA	NA	REPS_DISAGREE	0.6416	SCER	NA	0.0196648	NA	NA	0.79653
Scer_10.328	Spar_10.318	YJR051W	S000003812	OSM1	1081	1081	16289	15347	19307.8	17820.1	-0.245274	-0.215537	16603	23300	10125.7	14432	0.713364	0.691026	4180	2198	5051.56	3782.94	-0.273166	-0.783041	9724	8050	6152.38	6361.94	0.66032	0.339474	1	1	1	0.0002	SPAR	NA	0.6986	SPAR	NA	0.0002	SCER	NA	0.5432	SCER	NA	0.000334064	0.772994	0.000243994	0.706947
Scer_10.33	Spar_10.33	NA	NA	NA	1853	1853	61381	72622	23147.2	29320.1	1.40692	1.30849	21330	26146	18326.9	26077	0.218908	0.00381418	31604	26877	12974.3	12154.2	1.28438	1.14485	19206	17708	25386.3	24998.2	-0.402474	-0.4974	1	1	1	0.0002	SCER	NA	0.0554	SPAR	NA	0.0002	SPAR	NA	0.0002	SPAR	NA	0.000334064	0.0943276	0.000243994	0.000633882
Scer_10.330	Spar_10.322	YJR052W	S000003813	RAD7	1293	1293	13267	12231	8984.93	14223.3	0.562211	-0.217702	10717	14768	5886.1	8514.54	0.864407	0.794402	2745	4347	3988.6	1905.08	-0.538913	1.18975	3417	3930	2434.92	2853.8	0.488688	0.461505	1	1	1	NA	NA	REPS_DISAGREE	NA	NA	REPS_DISAGREE	0.0002	SCER	NA	0.5028	SPAR	NA	NA	NA	0.000243994	0.667199
Scer_10.331	Spar_10.323	YJR053W	S000003814	BFA1	1415	1418	4397	5934	6656.13	7232.26	-0.594997	-0.282342	1601	1930	3456.65	5171.08	-1.10686	-1.41834	2460	1896	2997.25	2801.17	-0.281821	-0.559768	3036	3280	3209.56	3531.49	-0.0771245	-0.103496	1	1	1	0.0012	SPAR	NA	NA	NA	REPS_DISAGREE	0.0002	SPAR	NA	0.0002	SCER	NA	0.001834	NA	0.000243994	0.000633882
Scer_10.332	Spar_10.324	YJR054W	S000003815	KCH1	1259	1265	13519	13694	17902.4	23357.2	-0.398281	-0.763421	10572	12342	22712.9	30632.3	-1.09633	-1.30455	918	1008	1007.49	1291.22	-0.127197	-0.350065	2822	1844	2991.89	2850.05	-0.0774531	-0.621014	1	0	0	0.0002	SPAR	NA	NA	NA	LOW_COV	0.0002	SPAR	NA	NA	NA	LOW_COV	0.000334064	NA	0.000243994	NA
Scer_10.339	Spar_10.328	YJR055W	S000003816	HIT1	420	420	4699	5935	5043.42	5700.85	-0.102029	0.0580608	4635	5585	2680.62	4449.65	0.789777	0.327799	2134	1996	2634.19	1407.14	-0.303672	0.504048	979	1915	958.174	1060.95	0.0309886	0.851382	1	1	0	NA	NA	REPS_DISAGREE	NA	NA	REPS_DISAGREE	0.0002	SCER	NA	NA	NA	LOW_COV	NA	NA	0.000243994	NA
Scer_10.345	Spar_10.332	YJR056C	S000003817	NA	525	519	9757	15393	8221.23	8400.42	0.230474	0.85708	8339	10126	6068.85	9261.73	0.441804	0.112114	2934	2151	1664.02	987.817	0.801239	1.10532	3316	4418	1886.47	2660.3	0.79684	0.715007	1	1	1	0.0002	SCER	NA	0.1556	SCER	NA	NA	NA	REPS_DISAGREE	0.2332	SPAR	NA	0.000334064	0.22871	NA	0.363145
Scer_10.349	Spar_10.335	YJR057W	S000003818	CDC8	589	589	17219	20496	15327.6	15425.2	0.167855	0.410026	9930	16447	8830.01	16688.1	0.16936	-0.020996	6226	6026	7072.58	7663.65	-0.183904	-0.34678	4669	5383	6037.14	7467.52	-0.370681	-0.472143	1	1	1	0.0004	SCER	NA	0.0002	SPAR	NA	NA	NA	REPS_DISAGREE	0.442	SPAR	NA	0.000643008	0.000685507	NA	0.603828
Scer_10.350	Spar_10.336	YJR058C	S000003819	APS2	339	339	12556	12679	9182.3	14138	0.451407	-0.157124	9557	16738	5879.17	9721.21	0.700851	0.783857	2266	2428	1738.65	540.276	0.38199	2.16593	2923	2627	1564.24	1884.6	0.901563	0.478939	1	0	0	NA	NA	REPS_DISAGREE	NA	NA	LOW_COV	0.0002	SCER	NA	NA	NA	LOW_COV	NA	NA	0.000243994	NA
Scer_10.351	Spar_10.337	YJR059W	S000003820	PTK2	1792	1792	37197	52910	30980.6	40803.2	0.263813	0.374851	41631	53826	14514.3	17727.3	1.52012	1.60227	9715	7246	10339.1	8662.55	-0.089816	-0.257575	18364	20495	16346.6	14491.3	0.167881	0.500055	1	1	1	0.0002	SCER	NA	0.0002	SPAR	NA	0.0002	SCER	NA	0.0002	SPAR	NA	0.000334064	0.000685507	0.000243994	0.000633882
Scer_10.352	Spar_10.338	YJR060W	S000003821	CBF1	972	966	27357	33829	24692.4	25119.9	0.138902	0.420484	32336	42527	9786.2	14334	1.71528	1.55993	22672	14140	15644.8	8902.45	0.526267	0.658514	31330	40719	9825.02	10090.7	1.66398	2.00364	1	1	1	0.0002	SCER	NA	0.006	SCER	NA	0.0002	SCER	NA	0.0002	SPAR	NA	0.000334064	0.013463	0.000243994	0.000633882
Scer_10.353	Spar_10.339	NA	NA	NA	2384	2384	5213	7291	5311.22	6360.86	-0.0269231	0.196867	4283	5601	3534.6	4171.39	0.277002	0.425069	386	0	173.461	375.975	1.14943	-8.55833	1083	929	561.247	515.461	0.947089	0.84857	1	0	0	NA	NA	REPS_DISAGREE	NA	NA	LOW_COV	0.0742	SCER	NA	NA	NA	LOW_COV	NA	NA	0.0780156	NA
Scer_10.354	Spar_10.340	YJR062C	S000003823	NTA1	1158	1158	15171	12174	8795.49	9169.6	0.786411	0.408834	10340	13854	6901.18	7518.29	0.583251	0.881739	2919	1015	1738.65	2487.69	0.747174	-1.29248	3870	2647	1734.96	2615.67	1.15697	0.0171687	1	1	1	0.0002	SCER	NA	0.589	SPAR	NA	NA	NA	REPS_DISAGREE	NA	NA	REPS_DISAGREE	0.000334064	0.67555	NA	NA
Scer_10.356	Spar_10.342	YJR064W	S000003825	CCT5	1009	1009	121889	139360	132969	133645	-0.125519	0.0604053	64704	81951	76234.3	114488	-0.236582	-0.482354	64541	42804	60073.1	51157.9	0.103495	-0.257205	63986	65918	66067.1	80447.8	-0.0461747	-0.287377	1	1	1	NA	NA	REPS_DISAGREE	NA	NA	REPS_DISAGREE	0.0002	SPAR	NA	0.0272	SCER	NA	NA	NA	0.000243994	0.0558512
Scer_10.357	Spar_10.343	YJR065C	S000003826	ARP3	822	822	53233	53165	58961.9	56998.6	-0.14746	-0.100447	47425	64449	48554.2	62019.4	-0.0339489	0.0554369	36047	28118	42002.9	24068.5	-0.220602	0.224341	46656	57854	68862.7	57712.5	-0.561649	0.00353315	1	1	1	0.0204	SPAR	NA	NA	NA	REPS_DISAGREE	0.0114	SCER	NA	0.3622	SPAR	NA	0.0270918	NA	0.0126132	0.518198
Scer_10.358	Spar_10.344	NA	NA	NA	5852	5858	26355	37768	31163.1	32650.9	-0.240275	0.211515	9230	9764	14924.8	18068.3	-0.691775	-0.886369	8895	2859	8289.84	4888.69	0.103117	-0.772249	15657	12214	9389.68	14240.2	0.739076	-0.219943	1	1	1	NA	NA	REPS_DISAGREE	NA	NA	REPS_DISAGREE	0.0002	SPAR	NA	0.0002	SCER	NA	NA	NA	0.000243994	0.000633882
Scer_10.359	Spar_10.345	YJR067C	S000003828	YAE1	379	376	7561	9871	6904.08	6930.54	0.119644	0.498701	6279	9613	4403.31	8912.18	0.500382	0.0977307	2945	3445	2243.9	1053.34	0.380639	1.69712	2658	3051	1246.27	1496.34	1.08065	1.01589	1	1	1	0.0432	SCER	NA	0.0068	SCER	NA	NA	NA	REPS_DISAGREE	0.0002	SPAR	NA	0.0549362	0.0148907	NA	0.000633882
Scer_10.360	Spar_10.346	YJR068W	S000003829	RFC2	725	725	23569	25173	24710.3	22510.6	-0.0682188	0.161265	17005	26108	16099.3	25996.2	0.078957	0.00618911	9679	5240	12163.5	10064.7	-0.329595	-0.941526	9338	9289	13049.5	12904.9	-0.482768	-0.474278	1	1	1	NA	NA	REPS_DISAGREE	0.0002	SPAR	NA	NA	NA	REPS_DISAGREE	0.3238	SCER	NA	NA	0.000685507	NA	0.473571
Scer_10.361	Spar_10.347	YJR069C	S000003830	HAM1	532	532	25586	23349	46709.9	34676.5	-0.868349	-0.570579	13882	21573	26586.2	44130.6	-0.937411	-1.03252	33565	17022	30232.7	16709.2	0.150843	0.0267533	28359	31061	25678.6	27952.1	0.143232	0.152142	1	1	1	0.0002	SPAR	NA	0.0002	SCER	NA	0.0004	SPAR	NA	0.0002	SCER	NA	0.000334064	0.000685507	0.000478845	0.000633882
Scer_10.362	Spar_10.348	YJR070C	S000003831	LIA1	621	621	112810	104322	97245.3	97987.3	0.214192	0.0903752	54971	80331	50587	79392.9	0.119901	0.0169466	124328	66593	116833	68704.7	0.0896994	-0.0450381	99472	124208	92518.2	88528	0.104551	0.488548	1	1	1	0.037	SCER	NA	0.0728	SPAR	NA	NA	NA	REPS_DISAGREE	0.8188	SCER	NA	0.0476394	0.11973	NA	0.932538
Scer_10.363	Spar_10.350	YJR072C	S000003833	NPA3	676	688	37746	28507	35178	33549.1	0.127033	-0.209564	26275	36219	26380.9	41002.7	0.019582	-0.153584	19593	10911	21262.1	11877	-0.0925563	-0.0969903	26228	24336	30527.1	32851.5	-0.193591	-0.407466	1	1	1	NA	NA	REPS_DISAGREE	NA	NA	REPS_DISAGREE	NA	NA	REPS_DISAGREE	0.8498	SPAR	NA	NA	NA	NA	0.951917
Scer_10.364	Spar_10.351	YJR073C	S000003834	OPI3	442	442	12289	14319	13453.1	16831.6	-0.130561	-0.233227	20102	39504	14314.2	17052.3	0.489859	1.21199	4545	2669	5736.33	4220.4	-0.335781	-0.660882	13069	12788	8062.32	6568.38	0.696813	0.961075	1	1	1	0.0036	SPAR	NA	0.0054	SPAR	NA	0.0002	SCER	NA	0.866	SCER	NA	0.00521554	0.0122798	0.000243994	0.962064
Scer_10.366	Spar_10.353	YJR075W	S000003836	HOC1	915	915	38523	39579	41374.9	36122.6	-0.103034	0.13183	30998	39350	26218.9	40332	0.241557	-0.0355602	14145	11043	18756	11564.5	-0.407036	-0.0665674	34224	21482	23399.5	26519.6	0.54851	-0.303916	1	1	1	NA	NA	REPS_DISAGREE	0.0182	SPAR	NA	NA	NA	REPS_DISAGREE	NA	NA	REPS_DISAGREE	NA	0.0353681	NA	NA
Scer_10.367	Spar_10.354	YJR076C	S000003837	CDC11	624	624	29111	33230	35570.8	32165.5	-0.289119	0.0469688	20307	27832	21290.8	32406.6	-0.0682476	-0.219536	14633	10561	15901	11516.1	-0.11988	-0.124899	19719	17829	18583	17150.3	0.0855958	0.0559846	1	1	1	NA	NA	REPS_DISAGREE	NA	NA	REPS_DISAGREE	NA	NA	REPS_DISAGREE	0.0382	SCER	NA	NA	NA	NA	0.0758929
Scer_10.368	Spar_10.355	YJR077C	S000003838	MIR1	555	555	89618	69721	92892.2	64362.8	-0.0517687	0.115363	19641	29901	42100	53303.1	-1.09991	-0.834003	113690	70576	131150	78425.7	-0.206109	-0.152146	88686	82462	86615.6	83925.1	0.0340799	-0.0253728	1	1	1	NA	NA	REPS_DISAGREE	0.1184	SPAR	NA	0.0002	SPAR	NA	0.0002	SCER	NA	NA	0.181711	0.000243994	0.000633882
Scer_10.369	Spar_10.356	YJR078W	S000003839	BNA2	917	932	500	884	864.87	670.922	-0.765932	0.420792	744	1211	926.74	921.536	-0.293072	0.417122	248	0	280.362	58.4627	-0.152873	-5.8705	946	1028	1058.47	687.699	-0.138503	0.602706	0	0	0	NA	NA	NA	NA	NA	NA	NA	NA	NA	NA	NA	NA	NA	NA	NA	NA
Scer_10.37	Spar_10.36	NA	NA	NA	1846	1875	52036	61139	63916.1	59140.4	-0.274176	0.0704369	23109	31411	48707.5	61438.8	-1.05317	-0.945371	20253	11090	21722	11147.2	-0.0785283	0.0150644	25678	21139	34406.8	34383.3	-0.399658	-0.679285	1	1	1	NA	NA	REPS_DISAGREE	NA	NA	REPS_DISAGREE	0.0002	SPAR	NA	0.0002	SCER	NA	NA	NA	0.000243994	0.000633882
Scer_10.371	Spar_10.358	YJR080C	S000003841	AIM24	840	840	17202	15404	16959.2	13076	0.0205076	0.236364	10406	15895	9853.76	14670.7	0.078662	0.115627	6978	8024	8597.43	7913.63	-0.301053	0.0199799	6148	6264	7552.29	8361.65	-0.296754	-0.416646	1	1	1	0.5014	SCER	NA	0.0102	SPAR	NA	NA	NA	REPS_DISAGREE	0.2002	SPAR	NA	0.54475	0.0214046	NA	0.321035
Scer_10.372	Spar_10.359	YJR082C	S000003842	EAF6	269	269	6431	5423	8734	8933.38	-0.44154	-0.720011	6739	12205	7831.39	12475.5	-0.216703	-0.0316242	1511	1494	3351.23	1783.11	-1.14866	-0.25506	2567	1799	2571.49	2943.05	-0.00252172	-0.709806	1	1	1	0.0002	SPAR	NA	NA	NA	REPS_DISAGREE	0.0002	SCER	NA	0.046	SCER	NA	0.000334064	NA	0.000243994	0.0898
Scer_10.373	Spar_10.360	YJR083C	S000003843	ACF4	758	758	9007	8843	9966.84	11584.3	-0.146073	-0.389527	7835	11405	6697.64	10050.1	0.226248	0.182433	4100	3908	6332.35	4459.29	-0.626992	-0.190338	4369	4349	6969.71	5078.3	-0.673671	-0.223613	1	1	1	0.0022	SPAR	NA	NA	NA	REPS_DISAGREE	0.0002	SCER	NA	0.9074	SPAR	NA	0.00326139	NA	0.000243994	0.98056
Scer_10.374	Spar_10.361	YJR084W	S000003844	NA	1092	1092	13572	15610	18215.8	13832.3	-0.424533	0.174417	14195	20051	14186.1	22104.8	0.000909827	-0.140681	3058	2643	4815.57	2143.97	-0.654946	0.301767	4233	3476	5618.87	6177.61	-0.408516	-0.82944	1	1	1	NA	NA	REPS_DISAGREE	NA	NA	REPS_DISAGREE	NA	NA	REPS_DISAGREE	0.101	SPAR	NA	NA	NA	NA	0.179719
Scer_10.375	Spar_10.362	YJR085C	S000003845	NA	188	188	14236	16277	17400.6	10322.9	-0.289571	0.65694	20171	34200	15017.5	21417.8	0.425612	0.675164	10175	5258	14765.4	10864	-0.537147	-1.04682	23253	23696	21389.3	16298.3	0.120524	0.539891	1	1	1	NA	NA	REPS_DISAGREE	0.026	SPAR	NA	NA	NA	REPS_DISAGREE	0.9318	SCER	NA	NA	0.0481897	NA	0.989918
Scer_10.376	Spar_10.363	YJR086W	S000003846	STE18	269	263	23	126	186.463	349.356	-2.99804	-1.49654	13866	26501	334.319	533.34	5.33743	5.59966	90	0	213.801	165.308	-1.27161	-7.41026	8769	10291	12.8041	223.95	9.27879	5.48323	0	0	0	NA	NA	NA	NA	NA	NA	NA	NA	NA	NA	NA	NA	NA	NA	NA	NA
Scer_10.377	Spar_10.364	YJR088C	S000003848	EMC2	733	733	32311	35755	28666.7	27245.8	0.172645	0.3921	25893	32014	22178.5	34757.3	0.223389	-0.118608	7905	4183	10886.7	6534.72	-0.461681	-0.643462	12522	9647	13627.8	18411.9	-0.122083	-0.932415	1	1	1	0.0002	SCER	NA	0.0002	SPAR	NA	NA	NA	REPS_DISAGREE	NA	NA	REPS_DISAGREE	0.000334064	0.000685507	NA	NA
Scer_10.378	Spar_10.365	YJR089W	S000003849	BIR1	2553	2574	14956	19405	22477.7	27324.2	-0.575919	-0.48191	9651	12922	14291.7	17659.5	-0.554562	-0.438764	2369	3356	3548.9	2461.48	-0.571072	0.458879	3032	3016	3881.78	3763.79	-0.344526	-0.307634	1	1	1	0.0002	SPAR	NA	0.9328	SCER	NA	NA	NA	REPS_DISAGREE	0.761	SCER	NA	0.000334064	0.954593	NA	0.890201
Scer_10.379	Spar_10.366	YJR090C	S000003850	GRR1	2371	2376	28947	33236	30359.7	35260.1	-0.0657033	-0.082249	16381	19170	14338.5	16688.1	0.195157	0.203057	4869	2541	6273.85	5373.53	-0.362621	-1.07713	6959	5206	7127.62	8180.24	-0.0314969	-0.648828	1	1	1	0.0278	SPAR	NA	0.0002	SPAR	NA	0.0002	SCER	NA	NA	NA	REPS_DISAGREE	0.0364362	0.000685507	0.000243994	NA
Scer_10.38	Spar_10.37	YJL197W	S000003733	UBP12	3080	3080	42950	51295	46052.4	53323.4	-0.100615	-0.0559495	14450	16776	22086.7	30789.4	-0.612075	-0.875997	13435	8656	14996.3	9774.35	-0.158603	-0.175282	12055	12803	14481.5	18144.6	-0.264554	-0.503023	1	1	1	0.1038	SPAR	NA	0.2858	SPAR	NA	0.0002	SPAR	NA	0.0002	SCER	NA	0.125447	0.381658	0.000243994	0.000633882
Scer_10.380	Spar_10.367	YJR091C	S000003851	JSN1	2651	2696	29318	45644	32956.3	38321	-0.144479	0.27657	16557	22462	19833.1	17496.3	-0.236171	0.384703	14621	11893	12818	10695.6	0.214142	0.17736	18750	20105	27439.2	22949.7	-0.52504	-0.166629	1	1	1	NA	NA	REPS_DISAGREE	NA	NA	REPS_DISAGREE	NA	NA	REPS_DISAGREE	0.7928	SPAR	NA	NA	NA	NA	0.91453
Scer_10.381	Spar_10.368	YJR092W	S000003852	BUD4	3834	3831	50619	62923	51877.3	63078.6	-0.036554	-0.00469164	26145	29199	29180.2	40724.5	-0.159577	-0.481093	22563	16485	22953.4	21845.9	-0.0258754	-0.407316	26304	28368	32345.3	32194.2	-0.299394	-0.183661	1	1	1	0.9076	SPAR	NA	NA	NA	REPS_DISAGREE	0.0002	SPAR	NA	0.0002	SCER	NA	0.921264	NA	0.000243994	0.000633882
Scer_10.382	Spar_10.369	YJR093C	S000003853	FIP1	722	722	14645	12310	16240.1	18276.7	-0.149144	-0.570134	11000	17735	14157.5	18550.1	-0.364031	-0.0648232	8445	4773	13185.1	4911.87	-0.642675	-0.0413681	5937	9246	12217.3	12395.7	-1.04099	-0.422896	1	1	1	0.0002	SPAR	NA	NA	NA	REPS_DISAGREE	NA	NA	REPS_DISAGREE	NA	NA	REPS_DISAGREE	0.000334064	NA	NA	NA
Scer_10.383	Spar_10.370	YJR094C	S000003854	IME1	895	907	4498	6901	473.1	900.187	3.26556	2.95633	2941	5105	310.068	392.49	3.26071	3.71701	1597	934	56.4758	4.03191	4.81638	7.55693	2440	1571	221.938	162.646	3.47197	3.28317	1	0	0	0.0002	SCER	NA	NA	NA	LOW_COV	NA	NA	REPS_DISAGREE	NA	NA	LOW_COV	0.000334064	NA	NA	NA
Scer_10.385	Spar_10.372	YJR095W	S000003856	SFC1	533	533	67	0	189.438	591.523	-1.48572	-9.21073	143	211	161.097	267.958	-0.170787	-0.343317	0	0	0	0	0	0	28	0	170.721	65.4753	-2.56595	-6.05475	0	0	0	NA	NA	NA	NA	NA	NA	NA	NA	NA	NA	NA	NA	NA	NA	NA	NA
Scer_10.386	Spar_10.373	YJR096W	S000003857	NA	584	584	6479	5585	265.809	282.859	4.60212	4.29857	6985	10328	464.236	569.411	3.90843	4.17855	1539	1867	3.02549	0	8.57955	10.8673	4507	2853	309.433	256.063	3.86013	3.47279	1	0	0	0.0002	SCER	NA	NA	NA	LOW_COV	0.275	SPAR	NA	NA	NA	LOW_COV	0.000334064	NA	0.280954	NA
Scer_10.387	Spar_10.374	YJR097W	S000003858	JJJ3	411	399	5383	4538	7000.29	5266.14	-0.421692	-0.257395	3301	4715	6116.48	10760.4	-0.932348	-1.23298	1997	1706	4599.75	4272.81	-1.24606	-1.36681	1698	2030	4285.11	3875.55	-1.37773	-0.975333	1	1	1	0.0048	SPAR	NA	0.0002	SPAR	NA	0.0002	SPAR	NA	0.0002	SCER	NA	0.00685491	0.000685507	0.000243994	0.000633882
Scer_10.388	Spar_10.375	YJR098C	S000003859	NA	1598	1578	7228	8566	12665.6	11075.2	-0.82733	-0.388768	5198	5397	7389.67	8936.23	-0.525641	-0.745573	2170	2176	4592.69	5287.85	-1.09946	-1.29878	1661	2027	4895.44	4713.8	-1.57698	-1.23531	1	1	1	0.0002	SPAR	NA	0.0004	SPAR	NA	NA	NA	REPS_DISAGREE	0.001	SCER	NA	0.000334064	0.00125798	NA	0.00276591
Scer_10.389	Spar_10.376	YJR099W	S000003860	YUH1	682	655	12873	14327	8152.79	6643.71	0.600641	1.05028	10566	16126	5037.31	7602.45	1.01028	1.02647	3467	2476	3203.99	3131.78	0.0555063	-0.397129	4811	5204	2876.66	2438.43	0.683465	1.03508	1	1	1	0.0002	SCER	NA	0.0002	SPAR	NA	NA	NA	REPS_DISAGREE	NA	NA	REPS_DISAGREE	0.000334064	0.000685507	NA	NA
Scer_10.39	Spar_10.38	YJL196C	S000003732	ELO1	616	616	29432	16060	19819.6	8861.93	0.570433	0.857707	34904	48954	19667.7	23801.9	0.827534	1.04032	15453	8585	12262.3	6076.09	0.333633	0.498607	34999	33216	15960.3	25196.3	1.13277	0.398653	1	1	1	0.0002	SCER	NA	0.003	SPAR	NA	NA	NA	REPS_DISAGREE	0.0078	SPAR	NA	0.000334064	0.0072398	NA	0.0181461
Scer_10.390	Spar_10.377	YJR100C	S000003861	AIM25	801	757	13339	14170	8718.13	10635.5	0.531994	0.332409	11673	16948	6003.02	10906.4	0.877789	0.554382	3024	1467	2973.05	2212.51	-0.057001	-0.673993	3213	3233	3235.17	3031.46	-0.0914275	0.0113206	1	1	1	0.0002	SCER	NA	0.0002	SPAR	NA	0.0002	SCER	NA	0.8834	SPAR	NA	0.000334064	0.000685507	0.000243994	0.967824
Scer_10.392	Spar_10.384	YJR101W	S000003862	RSM26	608	611	27947	26028	22494.6	21141	0.320206	0.30711	17435	25902	11290.6	16647.8	0.633915	0.644806	7648	5611	9014.95	4053.08	-0.230107	0.476243	5694	6311	7891.6	8865.43	-0.463704	-0.483156	1	1	1	0.0002	SCER	NA	NA	NA	REPS_DISAGREE	0.0002	SCER	NA	0.006	SPAR	NA	0.000334064	NA	0.000243994	0.0142289
Scer_10.393	Spar_10.385	YJR102C	S000003863	VPS25	542	542	6135	5104	10331.8	12306.9	-0.751865	-1.2696	6391	9327	7675.49	11947.3	-0.264179	-0.357169	2206	1246	4009.78	3138.84	-0.861796	-1.33223	3973	2993	6557.84	4294.68	-0.722849	-0.520811	1	1	1	0.0002	SPAR	NA	0.695	SPAR	NA	0.0002	SCER	NA	0.0002	SCER	NA	0.000334064	0.769871	0.000243994	0.000633882
Scer_10.394	Spar_10.386	NA	NA	NA	1081	1081	17973	14222	16399.8	16437.6	0.132145	-0.20886	17754	26135	12517.9	16935.5	0.504115	0.625905	5487	3418	4093.49	2214.53	0.422598	0.625925	12921	10138	7496.81	7047.97	0.785289	0.52443	1	1	1	NA	NA	REPS_DISAGREE	0.0002	SCER	NA	0.0002	SCER	NA	0.7128	SPAR	NA	NA	0.000685507	0.000243994	0.860825
Scer_10.395	Spar_10.387	YJR104C	S000003865	SOD1	213	213	177396	138087	136338	95596.4	0.379783	0.530544	159612	249945	82020.8	149792	0.960499	0.738646	204001	125900	126353	77337	0.691107	0.70304	227435	328943	137917	113211	0.721646	1.53881	1	1	1	0.0002	SCER	NA	0.155	SCER	NA	0.0002	SCER	NA	NA	NA	REPS_DISAGREE	0.000334064	0.228111	0.000243994	NA
Scer_10.396	Spar_10.388	YJR105W	S000003866	ADO1	604	604	105060	101206	87349.9	82649.4	0.266333	0.292215	87262	156772	51290.3	71166.9	0.766656	1.13938	96714	48808	83743.5	48644	0.207745	0.00485675	114997	113449	75998.8	77213.7	0.597541	0.555109	1	1	1	0.0002	SCER	NA	0.407	SPAR	NA	0.0002	SCER	NA	0.0002	SPAR	NA	0.000334064	0.506875	0.000243994	0.000633882
Scer_10.397	Spar_10.389	YJR106W	S000003867	ECM27	1812	1815	7934	10172	7490.25	7726.52	0.0854099	0.399055	3861	5601	4914.32	4907.41	-0.345551	0.193072	1404	1274	996.394	962.618	0.496721	0.406351	2211	2104	1103.29	1911.71	1.00462	0.140588	1	0	0	0.0074	SCER	NA	NA	NA	LOW_COV	NA	NA	REPS_DISAGREE	NA	NA	LOW_COV	0.0103488	NA	NA	NA
Scer_10.398	Spar_10.390	YJR107W	S000003868	NA	438	450	2718	2643	2427.98	2018.72	0.201717	0.427561	1789	2197	1146.73	1692.77	0.680167	0.414944	76	168	123.037	30.2393	-0.648841	2.47458	93	0	61.8865	42.121	0.618904	-5.39133	1	0	0	0.0028	SCER	NA	NA	NA	LOW_COV	NA	NA	LOW_COV	NA	NA	LOW_COV	0.00409033	NA	NA	NA
Scer_10.399	Spar_10.391	NA	NA	NA	116	116	3118	1703	2394.26	2455.42	0.3809	-0.527629	2093	2444	1721.83	2011.4	0.28148	0.280915	1628	1105	962.105	794.286	0.758221	0.475806	1533	1605	1009.39	864.941	0.602385	0.891132	1	0	0	NA	NA	REPS_DISAGREE	NA	NA	LOW_COV	NA	NA	REPS_DISAGREE	NA	NA	LOW_COV	NA	NA	NA	NA
Scer_10.40	Spar_10.39	YJL194W	S000003730	CDC6	1170	1170	7305	5502	9877.57	9057.45	-0.435221	-0.719045	1813	1850	10491.2	11248.2	-2.53207	-2.60345	6356	2505	5817.01	4380.67	0.127821	-0.806094	6166	5895	8476.32	7859.53	-0.45904	-0.414891	1	1	1	0.0002	SPAR	NA	NA	NA	REPS_DISAGREE	0.0002	SPAR	NA	0.0002	SCER	NA	0.000334064	NA	0.000243994	0.000633882
Scer_10.401	Spar_10.393	NA	NA	NA	2239	2239	28425	25280	43497.4	43616.9	-0.613752	-0.786866	10435	13149	20785.8	29900.5	-0.994101	-1.18516	25346	16084	34549.1	24014	-0.446873	-0.578223	31405	29191	43768.7	47740.2	-0.478893	-0.709663	1	1	1	0.0002	SPAR	NA	0.0006	SCER	NA	0.0002	SPAR	NA	0.0002	SCER	NA	0.000334064	0.00177375	0.000243994	0.000633882
Scer_10.404	Spar_10.395	YJR111C	S000003872	NA	550	550	8157	7697	7874.09	8813.29	0.0509195	-0.195361	5611	9312	5998.69	10437.5	-0.0963735	-0.164594	5576	2739	3968.43	2576.39	0.490557	0.0882654	4136	2631	3905.25	4219.61	0.0827991	-0.681292	1	1	1	NA	NA	REPS_DISAGREE	0.0478	SCER	NA	NA	NA	REPS_DISAGREE	0.7896	SPAR	NA	NA	0.0829398	NA	0.912402
Scer_10.405	Spar_10.396	YJR112W	S000003873	NNF1	519	519	10193	7702	7761.02	6244.73	0.393216	0.302549	9881	15845	7012.91	13931.2	0.494584	0.185691	2440	1326	3143.48	1582.52	-0.36535	-0.25497	5182	3788	5032.02	5558.73	0.0423642	-0.553196	1	0	0	0.0008	SCER	NA	NA	NA	LOW_COV	NA	NA	REPS_DISAGREE	NA	NA	LOW_COV	0.00124769	NA	NA	NA
Scer_10.408	Spar_10.398	YJR113C	S000003874	RSM7	576	576	26311	23319	23875.2	23522	0.140149	-0.0125021	17522	31267	20194.3	31058.2	-0.204768	0.00966455	17934	12744	11428.3	7719.09	0.650044	0.723242	14618	19144	20241.2	15987.2	-0.469519	0.259958	1	1	1	NA	NA	REPS_DISAGREE	0.0002	SCER	NA	NA	NA	REPS_DISAGREE	0.2232	SPAR	NA	NA	0.000685507	NA	0.350408
Scer_10.41	Spar_10.40	YJL193W	S000003729	NA	1044	1044	13397	16317	12693.4	14641.2	0.0778301	0.156334	8441	11651	8836.94	10567.2	-0.0661256	0.140852	2499	2073	3130.37	3793.02	-0.324867	-0.87131	5087	3507	3892.45	5709.28	0.38605	-0.702912	1	1	1	0.043	SCER	NA	0.0002	SPAR	NA	NA	NA	REPS_DISAGREE	NA	NA	REPS_DISAGREE	0.0547614	0.000685507	NA	NA
Scer_10.410	Spar_10.400	YJR116W	S000003877	TDA4	664	664	9852	9674	5230.88	6468.04	0.913234	0.580709	7495	13081	3289.49	4413.58	1.18782	1.56724	2970	3084	1977.66	1853.67	0.586424	0.734108	7960	10150	2635.51	1922.55	1.59432	2.39978	1	1	1	0.0002	SCER	NA	NA	NA	REPS_DISAGREE	0.0002	SCER	NA	NA	NA	REPS_DISAGREE	0.000334064	NA	0.000243994	NA
Scer_10.411	Spar_10.401	YJR117W	S000003878	STE24	848	848	51476	54818	43176.1	43142.5	0.253663	0.345534	27694	37565	28046.4	32009.8	-0.0182437	0.230867	27922	24029	23679.5	19284.6	0.237755	0.317311	43213	28626	34300.1	41181	0.333245	-0.524638	1	1	1	0.0002	SCER	NA	0.768	SPAR	NA	0.0224	SPAR	NA	0.4776	SPAR	NA	0.000334064	0.831648	0.0243017	0.642043
Scer_10.412	Spar_10.402	YJR118C	S000003879	ILM1	514	490	16847	17603	17722.9	14622.3	-0.142105	0.198645	16569	23951	10472.2	16160.8	0.59289	0.498572	6733	2651	6738.77	4489.53	-0.0702224	-0.828791	13938	9002	4133.59	6370.7	1.68432	0.42974	1	1	1	NA	NA	REPS_DISAGREE	NA	NA	REPS_DISAGREE	0.0002	SCER	NA	0.0518	SCER	NA	NA	NA	0.000243994	0.0992526
Scer_10.413	Spar_10.403	YJR119C	S000003880	JHD2	1903	1906	6292	6920	4496.93	4562.47	0.48676	0.603123	5300	7376	4862.35	5914.83	0.126586	0.320726	1078	518	1072.03	326.585	0.0102752	0.66614	1050	1122	1199.32	1843.73	-0.189382	-0.713782	1	0	0	0.0002	SCER	NA	NA	NA	LOW_COV	0.0002	SPAR	NA	NA	NA	LOW_COV	0.000334064	NA	0.000243994	NA
Scer_10.415	Spar_10.405	YJR121W	S000003882	ATP2	852	852	209678	212619	203058	186914	0.0462831	0.185893	68894	81908	109496	137186	-0.668415	-0.74405	133934	90527	142128	96305.1	-0.0856716	-0.0892638	98531	93486	194405	176818	-0.980407	-0.919438	1	1	1	0.0866	SCER	NA	0.0598	SPAR	NA	0.0002	SPAR	NA	0.0126	SPAR	NA	0.105865	0.100875	0.000243994	0.0281696
Scer_10.416	Spar_10.406	YJR122W	S000003883	IBA57	1356	1356	17249	16246	23768.1	26624.5	-0.462489	-0.712634	10108	14843	12736.2	18840.4	-0.333405	-0.344024	3771	1762	6470.51	3899.86	-0.778773	-1.14576	2607	1827	7925.75	7826.17	-1.60378	-2.09822	1	1	1	0.0002	SPAR	NA	0.0002	SPAR	NA	0.0002	SCER	NA	0.0002	SPAR	NA	0.000334064	0.000685507	0.000243994	0.000633882
Scer_10.418	Spar_10.408	YJR124C	S000003885	NA	980	983	25948	29450	18483.6	21678.9	0.493763	0.446367	16448	20246	13280.1	18317.3	0.313035	0.148829	7041	4941	4836.75	3773.87	0.546059	0.393079	13423	9817	6826.73	6741.03	0.979747	0.546655	1	1	1	0.0002	SCER	NA	NA	NA	REPS_DISAGREE	0.0002	SPAR	NA	NA	NA	REPS_DISAGREE	0.000334064	NA	0.000243994	NA
Scer_10.419	Spar_10.409	YJR125C	S000003886	ENT3	1042	1042	37626	33162	47245.5	54558.1	-0.32844	-0.718244	31712	51193	32781.5	45601	-0.0478505	0.166878	26984	16888	37323.4	18658.7	-0.467963	-0.143839	34089	40067	39498.6	35402.1	-0.212488	0.178575	1	1	1	0.0002	SPAR	NA	NA	NA	REPS_DISAGREE	0.0002	SCER	NA	0.6786	SCER	NA	0.000334064	NA	0.000243994	0.831978
Scer_10.42	Spar_10.41	YJL192C	S000003728	SOP4	536	536	37711	40113	34476.8	35505.3	0.129357	0.176032	33203	52465	21516.8	34868.9	0.625825	0.5894	22280	12450	18713.7	12995.8	0.251646	-0.0619001	23437	20974	17509.6	18348.9	0.420619	0.192897	1	1	1	0.0014	SCER	NA	NA	NA	REPS_DISAGREE	0.0002	SCER	NA	0.2958	SPAR	NA	0.00212301	NA	0.000243994	0.443453
Scer_10.420	Spar_10.410	YJR126C	S000003887	VPS70	1795	1765	27593	33174	26549.1	38152.2	0.0313197	-0.226024	22122	29158	18928.9	25293.7	0.200566	0.18079	5220	4026	7006.02	3129.77	-0.448791	0.338873	9027	6774	7323.95	9561.89	0.277271	-0.521542	1	1	1	NA	NA	REPS_DISAGREE	NA	NA	REPS_DISAGREE	0.0002	SCER	NA	NA	NA	REPS_DISAGREE	NA	NA	0.000243994	NA
Scer_10.423	Spar_10.413	YJR129C	S000003890	NA	960	960	6845	5305	10739.5	10927.3	-0.649723	-1.04237	5017	5425	6501.9	9921.32	-0.373972	-0.870789	2357	1739	2219.7	1254.93	0.0865493	0.47033	3571	2437	2183.1	1821.63	0.709692	0.419676	1	0	0	0.0002	SPAR	NA	NA	NA	LOW_COV	NA	NA	REPS_DISAGREE	NA	NA	LOW_COV	0.000334064	NA	NA	NA
Scer_10.424	Spar_10.414	NA	NA	NA	1630	1630	14213	18139	11978.3	13345	0.246775	0.442768	10982	13432	12753.5	13772.4	-0.215734	-0.0360991	2711	2211	2312.48	1159.17	0.229292	0.931011	2679	1892	4231.76	3787.56	-0.659365	-1.00097	1	1	1	0.0002	SCER	NA	NA	NA	REPS_DISAGREE	0.0002	SPAR	NA	0.4376	SPAR	NA	0.000334064	NA	0.000243994	0.600189
Scer_10.425	Spar_10.415	YJR131W	S000003892	MNS1	1493	1493	17327	15829	31131.4	28675	-0.84531	-0.857181	10589	15151	21000.6	27574.8	-0.987798	-0.863894	6053	5196	6950.56	5421.91	-0.199447	-0.0613878	11232	10161	10608.2	12610.9	0.0824264	-0.311598	1	1	1	0.0002	SPAR	NA	0.0002	SCER	NA	0.6158	SPAR	NA	0.0002	SCER	NA	0.000334064	0.000685507	0.617814	0.000633882
Scer_10.426	Spar_10.416	YJR132W	S000003893	NMD5	2485	2485	53320	53935	55091.8	56917.2	-0.0471609	-0.0776415	20387	24070	30238.6	42630.2	-0.568717	-0.824615	19879	10168	18542.2	12876.9	0.100427	-0.34072	19750	13768	19432.4	27122.6	0.0233892	-0.978125	1	1	1	0.054	SPAR	NA	NA	NA	REPS_DISAGREE	0.0002	SPAR	NA	NA	NA	REPS_DISAGREE	0.0678095	NA	0.000243994	NA
Scer_10.427	Spar_10.417	YJR133W	S000003894	XPT1	480	480	23815	21746	12781.6	12130.2	0.897746	0.842096	13586	23497	10662.7	16293.1	0.349518	0.528192	10588	7678	6828.53	2853.58	0.632709	1.42764	11284	10393	6969.71	7409.55	0.69503	0.488099	1	1	1	0.0002	SCER	NA	NA	NA	REPS_DISAGREE	0.0002	SPAR	NA	0.0002	SPAR	NA	0.000334064	NA	0.000243994	0.000633882
Scer_10.428	Spar_10.418	YJR134C	S000003895	SGM1	1853	1853	40797	40953	37379.8	45267.4	0.126199	-0.144499	24565	30769	24714.5	34632.7	-0.00875365	-0.170653	5267	5414	5567.91	4657.86	-0.0801388	0.216984	7299	6407	9940.26	9571.9	-0.445532	-0.579082	1	1	1	NA	NA	REPS_DISAGREE	NA	NA	REPS_DISAGREE	NA	NA	REPS_DISAGREE	0.3372	SPAR	NA	NA	NA	NA	0.488396
Scer_10.429	Spar_10.419	YJR135C	S000003896	MCM22	661	661	4227	5531	5701.99	4926.71	-0.431744	0.166884	4060	5561	4398.12	5908.82	-0.115379	-0.0875105	716	60	321.71	189.5	1.15173	-1.64291	1139	643	635.938	971.286	0.83981	-0.59432	1	0	0	NA	NA	REPS_DISAGREE	NA	NA	LOW_COV	NA	NA	REPS_DISAGREE	NA	NA	LOW_COV	NA	NA	NA	NA
Scer_10.431	Spar_10.421	YJR136C	S000003897	TTI2	1117	1117	12215	12236	12615	12061.7	-0.0464832	0.0206963	9363	13308	6079.24	9225.66	0.622996	0.528522	1816	1019	2594.86	2269.96	-0.514654	-1.15474	2239	1416	1959.03	2722.02	0.192624	-0.942368	1	1	1	NA	NA	REPS_DISAGREE	0.0002	SPAR	NA	0.0002	SCER	NA	NA	NA	REPS_DISAGREE	NA	0.000685507	0.000243994	NA
Scer_10.432	Spar_10.422	YJR137C	S000003898	MET5	2916	2916	20073	21965	23897	31746.7	-0.251562	-0.53138	8091	10836	8826.55	10635.9	-0.125517	0.0268908	5805	2362	5662.71	4516.75	0.0357983	-0.934983	10098	9389	7492.54	7095.1	0.430493	0.404099	1	1	1	0.0002	SPAR	NA	NA	NA	REPS_DISAGREE	0.0002	SCER	NA	0.9216	SCER	NA	0.000334064	NA	0.000243994	0.984917
Scer_10.433	Spar_10.423	YJR138W	S000003899	IML1	3327	3327	14773	16689	15854.3	14712.6	-0.101905	0.18183	7854	8932	6371.12	8073.1	0.301838	0.145844	1867	1464	2158.18	2233.68	-0.20899	-0.609166	4105	3463	3962.87	4323.87	0.050823	-0.320218	1	1	1	NA	NA	REPS_DISAGREE	0.2082	SPAR	NA	NA	NA	REPS_DISAGREE	NA	NA	REPS_DISAGREE	NA	0.292048	NA	NA
Scer_10.434	Spar_10.424	YJR139C	S000003900	HOM6	627	627	115809	94146	113063	87496.7	0.034621	0.105669	77465	123956	63758.8	87580.2	0.280915	0.501146	126179	65766	103128	49388.9	0.291036	0.413149	150484	125159	103105	101849	0.54549	0.297321	1	1	1	0.381	SCER	NA	0.0002	SCER	NA	0.0002	SCER	NA	0.0014	SPAR	NA	0.424059	0.000685507	0.000243994	0.00377538
Scer_10.435	Spar_10.425	YJR140C	S000003901	HIR3	3969	3969	27353	30185	23116.4	24982.9	0.242771	0.27288	10840	11918	11654.4	13945.8	-0.104501	-0.226676	6472	5665	5616.31	4329.26	0.204554	0.387877	9023	5974	8834.84	9498.92	0.0304002	-0.668976	1	1	1	0.0002	SCER	NA	NA	NA	REPS_DISAGREE	0.0002	SPAR	NA	0.6806	SPAR	NA	0.000334064	NA	0.000243994	0.832669
Scer_10.436	Spar_10.426	YJR141W	S000003902	NA	884	881	10319	13921	9670.28	7254.09	0.0887598	0.935396	8449	13232	6742.68	10142.9	0.32051	0.378623	883	324	658.548	991.849	0.417664	-1.61604	711	824	1030.73	953.77	-0.540022	-0.215664	1	0	0	0.0096	SCER	NA	NA	NA	LOW_COV	NA	NA	REPS_DISAGREE	NA	NA	LOW_COV	0.0132562	NA	NA	NA
Scer_10.437	Spar_10.427	YJR142W	S000003903	NA	708	708	12469	12601	17857.8	20147.5	-0.518172	-0.67702	12554	16395	10219.3	17160.5	0.296831	-0.0658305	3432	4627	6406.98	5078.19	-0.900399	-0.134209	7766	7265	3862.57	6323.58	1.00742	0.200193	1	1	1	0.0002	SPAR	NA	NA	NA	REPS_DISAGREE	0.0002	SCER	NA	0.966	SCER	NA	0.000334064	NA	0.000243994	1
Scer_10.438	Spar_10.428	YJR143C	S000003904	PMT4	1551	1551	95015	91953	100013	104527	-0.0739527	-0.184903	40895	52995	45608.6	54605.9	-0.157378	-0.0432002	44383	25272	33272.3	23222.8	0.415675	0.121994	69099	48896	38100.8	48573.5	0.858828	0.00954758	1	1	1	0.0006	SPAR	NA	0.0002	SCER	NA	NA	NA	REPS_DISAGREE	NA	NA	REPS_DISAGREE	0.000945863	0.000685507	NA	NA
Scer_10.439	Spar_10.429	YJR144W	S000003905	MGM101	490	490	18834	14920	15024.1	14286.9	0.326037	0.0625539	13098	18775	9972.41	17740.2	0.393297	0.0817859	12883	7674	8919.14	4285.92	0.530442	0.840226	11715	12741	8962.88	8569.75	0.386285	0.572098	1	1	1	0.3242	SCER	NA	0.0168	SCER	NA	NA	NA	REPS_DISAGREE	0.0294	SPAR	NA	0.366423	0.0328907	NA	0.0598214
Scer_10.442	Spar_10.432	YJR147W	S000003908	HMS2	845	845	11665	8467	4530.65	4636.9	1.3642	0.868548	6982	12666	2741.24	3559.03	1.34849	1.83111	1516	854	646.446	242.922	1.22839	1.8095	3063	2988	241.144	691.452	3.66148	2.10988	1	0	0	0.0002	SCER	NA	NA	NA	LOW_COV	NA	NA	REPS_DISAGREE	NA	NA	LOW_COV	0.000334064	NA	NA	NA
Scer_10.443	Spar_10.433	YJR148W	S000003909	BAT2	993	993	222584	232769	74786.5	72231.3	1.57349	1.68819	143585	213110	48232.9	72834.8	1.5738	1.54889	161623	122279	54957	50139.8	1.55624	1.28613	179731	214154	74605.3	63029.3	1.26848	1.76454	1	1	1	0.0002	SCER	NA	0.784	SPAR	NA	NA	NA	REPS_DISAGREE	0.0002	SPAR	NA	0.000334064	0.845105	NA	0.000633882
Scer_10.445	Spar_10.435	YJR150C	S000003911	DAN1	662	696	27	0	0	479.372	4.87961	-8.83575	133	1188	95.2723	89.3194	0.549296	3.79083	0	0	0	0	0.0722561	0.0722561	441	1550	0	27.5246	8.86016	5.8371	0	0	0	NA	NA	NA	NA	NA	NA	NA	NA	NA	NA	NA	NA	NA	NA	NA	NA
Scer_10.46	Spar_10.45	YJL187C	S000003723	SWE1	2113	2119	26858	31027	26595.8	31590.9	0.0182464	-0.0218928	11367	13095	13694.1	16903.7	-0.26459	-0.364207	4550	4245	3550.91	3401.92	0.361677	0.323421	5424	5799	3997.02	3944.78	0.444429	0.559833	1	1	1	NA	NA	REPS_DISAGREE	0.0032	SCER	NA	0.0002	SPAR	NA	0.9346	SCER	NA	NA	0.00763673	0.000243994	0.989918
Scer_10.47	Spar_10.46	YJL186W	S000003722	MNN5	1547	1547	60217	55353	84309	77882.5	-0.485509	-0.49263	34036	40213	44566.7	62626.6	-0.388893	-0.639101	34375	18515	33804.8	20988.1	0.0241314	-0.180868	40389	37397	32202.3	45290.1	0.326788	-0.276267	1	1	1	0.0002	SPAR	NA	0.0002	SCER	NA	NA	NA	REPS_DISAGREE	0.0002	SCER	NA	0.000334064	0.000685507	NA	0.000633882
Scer_10.48	Spar_10.47	YJL185C	S000003721	ATG36	820	820	2600	1696	1332.02	281.867	0.964369	2.58479	3536	7225	457.307	551.375	2.94814	3.70948	756	0	326.753	864.844	1.20769	-9.75796	1712	1675	198.464	316.95	3.10233	2.39815	0	0	0	NA	NA	NA	NA	NA	NA	NA	NA	NA	NA	NA	NA	NA	NA	NA	NA
Scer_10.49	Spar_10.48	YJL184W	S000003720	GON7	248	248	15615	11506	16965.1	13155.4	-0.119634	-0.193256	12526	17050	7513.52	15302	0.737288	0.156046	9398	4032	6816.43	3440.23	0.46328	0.228931	10693	12423	6485.28	5340.2	0.721338	1.21789	1	1	1	0.0342	SPAR	NA	0.0032	SCER	NA	0.0002	SCER	NA	NA	NA	REPS_DISAGREE	0.0442291	0.00763673	0.000243994	NA
Scer_10.50	Spar_10.49	YJL183W	S000003719	MNN11	1023	1023	48566	57000	53731.1	62443.4	-0.145807	-0.131584	28559	40338	32677.5	54585.3	-0.194348	-0.436364	18469	12438	16916.5	15640.8	0.126666	-0.330534	26381	17236	14370.5	18464.9	0.876345	-0.0993517	1	1	1	0.0006	SPAR	NA	NA	NA	REPS_DISAGREE	0.013	SPAR	NA	0.1962	SCER	NA	0.000945863	NA	0.0143266	0.31556
Scer_10.52	Spar_10.50	YJL181W	S000003717	NA	1767	1734	10319	12272	5682.16	9182.5	0.83348	0.391174	6157	7959	4905.66	6602.76	0.300523	0.242282	1704	1041	1071.02	58.4627	0.642238	4.10403	2364	2128	1086.22	1319.51	1.094	0.661878	1	0	0	0.0002	SCER	NA	NA	NA	LOW_COV	0.0418	SPAR	NA	NA	NA	LOW_COV	0.000334064	NA	0.0446692	NA
Scer_10.53	Spar_10.51	YJL180C	S000003716	ATP12	902	902	23442	19612	25054.5	22800.4	-0.0959677	-0.217314	9523	13728	15362.2	22924.2	-0.689842	-0.739705	12525	6425	11851.8	5852.31	0.0796923	0.134667	6412	7141	8881.79	9171.96	-0.470013	-0.361059	1	1	1	0.0014	SPAR	NA	0.023	SCER	NA	0.0002	SPAR	NA	0.0518	SCER	NA	0.00212301	0.0433426	0.000243994	0.0992526
Scer_10.54	Spar_10.52	YJL179W	S000003715	PFD1	216	216	11792	14762	12369	15130.5	-0.0689186	-0.0355671	9010	15573	7869.49	14864.8	0.195233	0.0671419	4664	3046	7842.07	4499.61	-0.749541	-0.562731	4829	5085	6739.23	6734.78	-0.480775	-0.405313	1	1	1	0.6758	SPAR	NA	0.0016	SPAR	NA	0.031	SCER	NA	0.757	SCER	NA	0.713661	0.00418584	0.033337	0.887835
Scer_10.55	Spar_10.53	YJL178C	S000003714	ATG27	590	590	35018	33889	28609.2	24860.8	0.291611	0.446927	25739	36249	19287.5	31406.9	0.416275	0.206852	15815	12444	15384.6	11608.9	0.0398033	0.100214	22393	20574	16214.3	17828	0.465759	0.206663	1	1	1	0.0002	SCER	NA	0.0018	SPAR	NA	NA	NA	REPS_DISAGREE	NA	NA	REPS_DISAGREE	0.000334064	0.00463725	NA	NA
Scer_10.57	Spar_10.55	YJL176C	S000003712	SWI3	1917	1899	36616	47523	40571.5	45448	-0.1616	0.050797	21895	26146	18684.6	22387.4	0.215127	0.210284	14590	7509	18176.1	19418.7	-0.330656	-1.38424	14439	14887	18105	16931.8	-0.340009	-0.199283	1	1	1	NA	NA	REPS_DISAGREE	0.0002	SPAR	NA	0.0002	SCER	NA	0.0274	SCER	NA	NA	0.000685507	0.000243994	0.056219
Scer_10.58	Spar_10.56	YJL174W	S000003710	KRE9	618	618	36422	38069	45004	48964.4	-0.305235	-0.363108	31787	50352	39088.5	53931.7	-0.298299	-0.0990833	29536	19361	28167.3	19717	0.068451	-0.0262881	41967	42038	41673.1	43868.8	0.010138	-0.0615013	1	1	1	0.0002	SPAR	NA	0.0002	SCER	NA	0.1316	SCER	NA	0.3146	SCER	NA	0.000334064	0.000685507	0.136727	0.465933
Scer_10.59	Spar_10.57	YJL173C	S000003709	RFA3	249	249	17316	14471	12784.6	13621.9	0.437668	0.0872307	13505	23284	9058.67	12899.8	0.576071	0.851943	7266	7830	10801	12291.3	-0.571866	-0.650483	9589	13118	14084.5	11454	-0.55461	0.19568	1	1	1	0.0772	SCER	NA	0.0002	SPAR	NA	0.0002	SCER	NA	NA	NA	REPS_DISAGREE	0.0951699	0.000685507	0.000243994	NA
Scer_10.60	Spar_10.58	YJL172W	S000003708	CPS1	1023	1023	23524	23301	19918.8	15971.1	0.239992	0.544898	12610	17401	6061.92	7629.94	1.0566	1.18932	31390	20092	19959.1	12963.6	0.653229	0.632116	44881	48719	21551.5	21003	1.05828	1.21385	1	1	1	0.0002	SCER	NA	0.4868	SCER	NA	0.0002	SCER	NA	0.0002	SPAR	NA	0.000334064	0.583814	0.000243994	0.000633882
Scer_10.61	Spar_10.59	YJL171C	S000003707	NA	890	890	23070	23921	30835.8	30684.8	-0.418572	-0.359231	9580	11542	41352.5	47014.6	-2.10976	-2.02612	32103	18540	25812.5	14150	0.31463	0.389817	34930	38123	56457.6	51760.5	-0.692685	-0.44118	1	1	1	0.0002	SPAR	NA	0.0002	SCER	NA	0.0002	SPAR	NA	0.0002	SCER	NA	0.000334064	0.000685507	0.000243994	0.000633882
Scer_10.62	Spar_10.60	YJL170C	S000003706	ASG7	587	698	126	326	540.544	947.826	-1.84238	-1.28699	113	317	541.32	462.915	-2.00024	-0.294967	13	0	0	0	4.05722	0.249867	43	29	61.8865	163.48	-0.265381	-2.20501	0	0	0	NA	NA	NA	NA	NA	NA	NA	NA	NA	NA	NA	NA	NA	NA	NA	NA
Scer_10.63	Spar_10.63	YJL168C	S000003704	SET2	1544	1544	34708	39876	32806.6	38615.7	0.0812819	0.0463312	18181	22452	21642.4	29246.1	-0.251417	-0.381385	11659	7514	10811.1	6527.66	0.108924	0.202986	9333	11066	7601.37	8879.61	0.296045	0.317533	1	1	1	0.201	SCER	NA	0.6212	SCER	NA	0.0002	SPAR	NA	0.325	SCER	NA	0.234199	0.703616	0.000243994	0.47481
Scer_10.64	Spar_10.64	YJL167W	S000003703	ERG20	708	708	103406	104927	120917	105527	-0.225697	-0.0082299	75268	118034	100528	144046	-0.417483	-0.287329	100372	52189	96146	51394.7	0.0620577	0.0221248	115802	114722	141643	145945	-0.290601	-0.347278	1	1	1	0.8226	SPAR	NA	0.7104	SCER	NA	0.0002	SPAR	NA	NA	NA	REPS_DISAGREE	0.847	0.782532	0.000243994	NA
Scer_10.66	Spar_10.66	YJL165C	S000003701	HAL5	2026	2023	38502	43983	43818.8	49345.5	-0.188749	-0.168107	22761	29565	30436	41920	-0.421339	-0.505872	11270	8220	9594.83	8838.95	0.229998	-0.106862	10865	10923	14601	15238.6	-0.428479	-0.482465	1	1	0	0.0002	SPAR	NA	0.4652	SCER	NA	0.0002	SPAR	NA	0.4936	SPAR	NA	0.000334064	0.565654	0.000243994	0.657645
Scer_10.67	Spar_10.67	YJL164C	S000003700	TPK1	778	778	6641	11375	14482.6	22086.8	-1.12473	-0.957258	8846	11585	12938.8	16792	-0.548561	-0.535481	1857	1155	1983.71	1421.25	-0.095179	-0.299031	4924	5585	2878.79	2803.76	0.774159	0.993939	1	0	0	0.0002	SPAR	NA	NA	NA	LOW_COV	0.0002	SCER	NA	NA	NA	LOW_COV	0.000334064	NA	0.000243994	NA
Scer_10.68	Spar_10.68	YJL163C	S000003699	NA	1398	1410	3788	2848	11947.5	12442.8	-1.64461	-2.11457	6660	10291	7156.68	7324.19	-0.0914233	0.502916	636	565	2764.29	2837.46	-2.10573	-2.3139	1285	2356	1924.88	2417.16	-0.5703	-0.0246292	1	1	1	0.0002	SPAR	NA	0.2512	SPAR	NA	0.0002	SCER	NA	0.0002	SCER	NA	0.000334064	0.342414	0.000243994	0.000633882
Scer_10.69	Spar_10.69	YJL162C	S000003698	JJJ2	1518	1500	11247	9989	9879.56	11339.2	0.169795	-0.200096	7934	10559	6346	8828.02	0.304945	0.241076	1064	1442	991.352	717.68	0.0847208	0.988441	1521	2234	1581.31	1211.92	-0.0732713	0.864584	1	0	0	NA	NA	REPS_DISAGREE	NA	NA	LOW_COV	0.001	SCER	NA	NA	NA	LOW_COV	NA	NA	0.00117465	NA
Scer_10.71	Spar_10.71	YJL161W	S000003697	FMP33	489	489	1078	416	1063.23	853.54	0.0198782	-1.0351	1365	3214	1290.51	1613.76	0.080902	0.993498	86	58	422.56	464.677	-2.28348	-2.98054	574	615	655.144	623.475	-0.19045	-0.0197127	0	0	0	NA	NA	NA	NA	NA	NA	NA	NA	NA	NA	NA	NA	NA	NA	NA	NA
Scer_10.75	Spar_10.76	YJL158C	S000003694	CIS3	436	420	182837	141241	180622	150084	-0.0363545	-0.14155	145280	227665	156881	200776	-0.164777	0.127384	191830	108408	244874	130064	-0.406148	-0.316691	305329	396884	279691	215069	0.0725921	0.829975	1	1	1	0.3448	SPAR	NA	0.0418	SPAR	NA	NA	NA	REPS_DISAGREE	0.0214	SCER	NA	0.38721	0.0737739	NA	0.0453592
Scer_10.76	Spar_10.77	YJL157C	S000003693	FAR1	2187	2187	487	1133	4365.02	5248.28	-3.16136	-2.2107	25708	28517	1811.04	2898.59	3.82659	3.29795	145	0	0	58.4627	7.18982	-5.89391	22255	15166	381.989	112.184	5.86075	7.06613	1	0	0	0.0002	SPAR	NA	NA	NA	LOW_COV	0.0002	SCER	NA	NA	NA	LOW_COV	0.000334064	NA	0.000243994	NA
Scer_10.78	Spar_10.79	YJL156C	S000003692	SSY5	1718	1718	18534	19280	16156.8	15602.9	0.198021	0.305273	10758	13824	10881	14196.6	-0.0163953	-0.0383704	6208	2808	8011.49	3297.09	-0.36789	-0.231575	7068	6683	7898	7753.19	-0.160164	-0.214264	1	1	1	0.0002	SCER	NA	0.0002	SPAR	NA	0.0002	SPAR	NA	0.0186	SCER	NA	0.000334064	0.000685507	0.000243994	0.0398952
Scer_10.79	Spar_10.80	YJL155C	S000003691	FBP26	817	817	7744	8796	6514.3	9247.01	0.249434	-0.0721314	6554	9193	5044.24	6637.98	0.377674	0.469732	1655	1234	1352.39	140.109	0.291122	3.12963	3189	2824	1481.01	1681.5	1.106	0.74764	1	0	0	NA	NA	REPS_DISAGREE	NA	NA	LOW_COV	0.0004	SCER	NA	NA	NA	LOW_COV	NA	NA	0.000478845	NA
Scer_10.80	Spar_10.81	YJL154C	S000003690	VPS35	2094	2094	52383	53170	40395	42586.7	0.374914	0.320204	28952	39165	29027.7	35808.5	-0.00376947	0.12926	15501	6921	12314.7	7648.53	0.33195	-0.144182	19220	12928	11933.4	14679	0.687553	-0.183238	1	1	1	0.0002	SCER	NA	0.4186	SPAR	NA	0.0002	SPAR	NA	NA	NA	REPS_DISAGREE	0.000334064	0.518862	0.000243994	NA
Scer_10.81	Spar_10.82	YJL153C	S000003689	INO1	1337	1337	2427	7335	2331.78	4576.36	0.0577198	0.680477	4181	6499	4630.24	2096.43	-0.147204	1.63182	149	28	115.977	233.851	0.358737	-3.01762	455	408	522.835	94.6681	-0.200078	2.09599	1	0	0	0.2046	SCER	NA	NA	NA	LOW_COV	NA	NA	REPS_DISAGREE	NA	NA	LOW_COV	0.23792	NA	NA	NA
Scer_10.83	Spar_10.83	YJL151C	S000003687	SNA3	335	332	30948	22235	17124.8	16000.9	0.840741	0.461677	38369	68669	25938.3	35647	0.55186	0.93288	18349	13687	12359.1	9501.19	0.557109	0.513602	40307	40830	34554	24198.3	0.209193	0.74172	1	1	1	0.0002	SCER	NA	NA	NA	REPS_DISAGREE	NA	NA	REPS_DISAGREE	0.0002	SPAR	NA	0.000334064	NA	NA	0.000633882
Scer_10.85	Spar_10.85	YJL149W	S000003685	DAS1	1563	1560	15989	21312	12173.6	17587.9	0.390519	0.274298	11628	15452	11641.4	12739.2	-0.00443479	0.27573	3843	2276	3502.51	2768.91	0.131037	-0.285478	5803	4512	6280.42	7420.81	-0.116814	-0.720456	1	1	1	0.0002	SCER	NA	0.0046	SPAR	NA	NA	NA	REPS_DISAGREE	0.4632	SPAR	NA	0.000334064	0.0106137	NA	0.627652
Scer_10.86	Spar_10.86	YJL148W	S000003684	RPA34	635	635	68242	74262	81936.5	75579.9	-0.263843	-0.0253789	34256	47862	51288.6	86741.1	-0.582266	-0.857822	43429	26858	46449.3	19270.5	-0.0969964	0.478936	18403	16829	25177.2	37610.7	-0.452153	-1.16015	1	1	1	0.6256	SPAR	NA	0.0142	SCER	NA	0.0002	SPAR	NA	NA	NA	REPS_DISAGREE	0.666673	0.0284843	0.000243994	NA
Scer_10.87	Spar_10.87	YJL147C	S000003683	NA	1048	1048	6325	7091	6001.52	6139.53	0.0757241	0.207829	5189	8341	4243.08	6020.47	0.290282	0.470278	635	426	857.222	942.459	-0.432324	-1.14372	1573	1204	1103.29	1546.8	0.511319	-0.361187	1	0	0	0.096	SCER	NA	NA	NA	LOW_COV	0.0586	SCER	NA	NA	NA	LOW_COV	0.116745	NA	0.0620173	NA
Scer_10.88	Spar_10.88	YJL146W	S000003682	IDS2	1161	1161	12259	14552	12296.6	11611.1	-0.00442129	0.325686	9753	12848	8316.41	9506.5	0.22986	0.434518	4827	2400	3274.59	2488.7	0.559672	-0.0523338	5044	5477	4208.28	3551.09	0.261279	0.624979	1	1	1	NA	NA	REPS_DISAGREE	NA	NA	REPS_DISAGREE	NA	NA	REPS_DISAGREE	NA	NA	REPS_DISAGREE	NA	NA	NA	NA
Scer_10.89	Spar_10.89	YJL145W	S000003681	SFH5	796	796	37429	31868	36384.1	34962.4	0.0408489	-0.133691	28190	39595	12706.7	23029.8	1.14953	0.78179	24042	14114	16660.4	8618.2	0.529111	0.711603	23711	22557	8363.22	10426.4	1.50331	1.11326	1	1	1	NA	NA	REPS_DISAGREE	0.0002	SCER	NA	0.0002	SCER	NA	0.2584	SPAR	NA	NA	0.000685507	0.000243994	0.396204
Scer_10.91	Spar_10.91	YJL143W	S000003679	TIM17	300	300	42053	34977	38298.3	28509.2	0.134926	0.294969	21420	34785	21716	39854.5	-0.0198009	-0.196271	29804	13343	28228.8	15762.7	0.0783347	-0.240419	21746	23981	18580.9	21964.2	0.226918	0.12673	1	1	1	0.0012	SCER	NA	0.4236	SPAR	NA	0.0002	SPAR	NA	0.8478	SCER	NA	0.001834	0.524235	0.000243994	0.950863
Scer_10.92	Spar_10.93	YJL141C	S000003677	YAK1	2068	2042	33298	45344	32692.5	44919	0.00822209	-0.00466818	35882	44522	25136.3	24019.2	0.495217	0.87205	5728	4716	7961.07	4760.68	-0.493113	-0.031853	9198	8822	12377.3	8883.37	-0.446519	-0.0282531	1	1	1	NA	NA	REPS_DISAGREE	0.785	SPAR	NA	0.0002	SCER	NA	0.4754	SPAR	NA	NA	0.845412	0.000243994	0.640044
Scer_10.93	Spar_10.94	YJL140W	S000003676	RPB4	372	372	26360	27952	26655.3	28357.4	-0.0160693	-0.0207713	24279	35804	15508.6	29319.9	0.646607	0.288229	8982	6022	7968.13	6195.03	0.172776	-0.0408611	10256	10510	10454.6	11771	-0.0276612	-0.163454	1	1	1	0.751	SPAR	NA	NA	NA	REPS_DISAGREE	0.0002	SCER	NA	0.0138	SPAR	NA	0.783167	NA	0.000243994	0.0306743
Scer_10.94	Spar_10.95	YJL139C	S000003675	YUR1	1065	1065	12025	12738	16433.5	16360.2	-0.450573	-0.361024	7704	9424	9574.87	12880	-0.313609	-0.450683	1676	1699	2845.98	1632.92	-0.763548	0.0571949	2565	2644	4968	3904.74	-0.953433	-0.56233	1	1	1	0.0002	SPAR	NA	NA	NA	REPS_DISAGREE	NA	NA	REPS_DISAGREE	NA	NA	REPS_DISAGREE	0.000334064	NA	NA	NA
Scer_10.96	Spar_10.97	YJL137C	S000003673	GLG2	870	870	9810	12622	2610.48	5759.41	1.90953	1.13181	7488	10446	1195.23	1562.23	2.64627	2.74049	2796	3232	1318.1	787.23	1.08432	2.03618	3239	3201	1024.33	1109.74	1.65991	1.52745	1	1	1	0.0002	SCER	NA	NA	NA	REPS_DISAGREE	0.0002	SCER	NA	0.0002	SPAR	NA	0.000334064	NA	0.000243994	0.000633882
Scer_11.100	Spar_11.122	YKL134C	S000001617	41548	1831	1831	16247	17564	18033.3	15708.1	-0.150484	0.161102	8257	10647	9208.5	12579.4	-0.157331	-0.240599	3849	2472	5721.2	2634.85	-0.571711	-0.0920071	4809	3839	3162.62	5842.31	0.604462	-0.60568	1	1	1	NA	NA	REPS_DISAGREE	0.026	SPAR	NA	0.065	SPAR	NA	NA	NA	REPS_DISAGREE	NA	0.0481897	0.068554	NA
Scer_11.101	Spar_11.123	YKL133C	S000001616	NA	1180	1180	2796	3816	6046.16	7596.5	-1.11238	-0.993086	4381	6801	4855.42	7466.76	-0.148305	-0.134716	88	144	909.663	835.613	-3.35504	-2.52851	633	230	1530.09	1209	-1.27201	-2.38904	1	0	0	0.0002	SPAR	NA	NA	NA	LOW_COV	0.0002	SCER	NA	NA	NA	LOW_COV	0.000334064	NA	0.000243994	NA
Scer_11.102	Spar_11.124	YKL132C	S000001615	RMA1	1179	1182	5292	7561	6025.33	9059.43	-0.183527	-0.257145	4913	7014	5290.21	5514.61	-0.103034	0.350588	197	0	28.2379	0	2.76326	0.00366632	401	91	151.515	162.646	1.40191	-0.827202	1	0	0	0.0006	SPAR	NA	NA	NA	LOW_COV	0.0008	SCER	NA	NA	NA	LOW_COV	0.000945863	NA	0.000944419	NA
Scer_11.103	Spar_11.125	YKL130C	S000001613	SHE2	639	639	19279	16187	16839.2	15393.5	0.195197	0.0725108	13744	22555	9541.96	16487.2	0.526399	0.452081	6547	3330	5606.23	3830.31	0.223766	-0.201883	6833	5870	4193.35	6007.04	0.704284	-0.0332889	1	1	1	0.2986	SCER	NA	NA	NA	REPS_DISAGREE	0.0002	SCER	NA	NA	NA	REPS_DISAGREE	0.339239	NA	0.000243994	NA
Scer_11.104	Spar_11.126	NA	NA	NA	3070	3042	16861	21534	17805.2	18066.3	-0.091824	0.240087	15452	19276	16437.9	17461.1	-0.102449	0.129437	9042	4036	6796.26	5792.84	0.398631	-0.534456	18626	14785	16570.7	18595.4	0.155459	-0.34401	1	1	1	NA	NA	REPS_DISAGREE	NA	NA	REPS_DISAGREE	NA	NA	REPS_DISAGREE	NA	NA	REPS_DISAGREE	NA	NA	NA	NA
Scer_11.105	Spar_11.127	YKL128C	S000001611	PMU1	701	701	30721	25552	13664.4	14733.5	1.16875	0.794296	24478	38324	8125.86	12159.5	1.59077	1.65609	11628	6900	5361.17	3373.7	1.11684	1.03205	17589	12342	3297.06	3834.68	2.41507	1.68614	1	1	1	0.0002	SCER	NA	NA	NA	REPS_DISAGREE	0.0002	SCER	NA	0.0002	SPAR	NA	0.000334064	NA	0.000243994	0.000633882
Scer_11.107	Spar_11.131	NA	NA	NA	1408	1408	48955	50483	32266	37944.8	0.601426	0.411886	31667	43626	21127.9	29848.1	0.583805	0.547532	36914	22253	24480.2	18522.6	0.592531	0.264701	61250	56769	27153.3	30966.5	1.17356	0.874375	1	1	1	0.0002	SCER	NA	0.8862	SPAR	NA	NA	NA	REPS_DISAGREE	NA	NA	REPS_DISAGREE	0.000334064	0.920854	NA	NA
Scer_11.108	Spar_11.132	NA	NA	NA	1139	1139	31709	31296	33229.1	32701.5	-0.0675514	-0.0633759	26164	31235	30983.4	36232.7	-0.243905	-0.214124	13284	9581	14771.4	13239.8	-0.15311	-0.466589	22051	20088	33642.8	27874.5	-0.609431	-0.472594	1	1	1	0.1202	SPAR	NA	0.1448	SPAR	NA	0.0002	SPAR	NA	NA	NA	REPS_DISAGREE	0.144125	0.214973	0.000243994	NA
Scer_11.109	Spar_11.133	YKL125W	S000001608	RRN3	1286	1289	36833	37937	38799.1	35417.9	-0.0716625	0.102485	20284	20786	30815.4	45321.9	-0.599924	-1.1212	8326	5505	7094.77	4188.14	0.234199	0.397711	7840	5519	10943.2	17215	-0.477702	-1.63765	1	1	1	NA	NA	REPS_DISAGREE	0.0024	SCER	NA	0.0002	SPAR	NA	NA	NA	REPS_DISAGREE	NA	0.00596219	0.000243994	NA
Scer_11.11	Spar_11.14	YKL216W	S000001699	URA1	710	710	189818	218046	174743	181708	0.119378	0.263012	26651	37933	28486.4	47079.9	-0.0960815	-0.31165	134020	98005	109781	68720.8	0.28782	0.512101	29149	26535	30975.3	35706.1	-0.0876681	-0.428261	1	1	1	0.0002	SCER	NA	0.0272	SCER	NA	0.0002	SPAR	NA	0.6214	SPAR	NA	0.000334064	0.0503743	0.000243994	0.779354
Scer_11.110	Spar_11.134	YKL124W	S000001607	SSH4	1385	1367	10443	9625	11262.2	12352.5	-0.12781	-0.378785	9693	10985	7773.36	8289.53	0.299496	0.387258	951	899	2578.72	808.398	-1.45706	0.134204	2278	2415	2539.48	2423.84	-0.175574	-0.0241395	1	0	0	0.0002	SPAR	NA	NA	NA	LOW_COV	0.0002	SCER	NA	NA	NA	LOW_COV	0.000334064	NA	0.000243994	NA
Scer_11.111	Spar_11.135	YKL122C	S000001605	SRP21	364	370	25606	29715	23635.2	20349	0.13913	0.569799	25530	42477	16276.8	27720.8	0.672927	0.639283	17623	12185	19249.2	12906.1	-0.103743	-0.0593577	12593	14354	15516.5	15009.7	-0.277568	-0.0408496	1	1	1	0.0032	SCER	NA	0.0586	SPAR	NA	0.0808	SCER	NA	0.0028	SPAR	NA	0.00465334	0.0989215	0.0846647	0.00710283
Scer_11.112	Spar_11.136	YKL121W	S000001604	DGR2	1991	1991	7930	5900	9117.83	14435.7	-0.201347	-1.29071	7678	9031	5151.63	4738.22	0.575608	0.930395	1281	621	1396.77	682.4	-0.124728	-0.135817	1853	1248	695.69	1620.2	1.41205	-0.376289	1	0	0	0.0002	SPAR	NA	NA	NA	LOW_COV	0.0002	SCER	NA	NA	NA	LOW_COV	0.000334064	NA	0.000243994	NA
Scer_11.113	Spar_11.137	YKL120W	S000001603	OAC1	606	606	25050	24262	16688.4	21886.3	0.585934	0.148661	8221	9771	16765.3	28485.2	-1.02801	-1.54353	10762	8765	6641.96	7478.18	0.696183	0.229038	3803	3565	13053.8	12965.4	-1.77899	-1.86239	1	1	1	0.0048	SCER	NA	0.371	SCER	NA	0.0002	SPAR	NA	0.0002	SPAR	NA	0.00685491	0.470969	0.000243994	0.000633882
Scer_11.114	Spar_11.138	YKL119C	S000001602	VPH2	502	502	12615	13947	13692.1	15617.8	-0.118197	-0.163224	9845	16507	8655.92	13763.8	0.185683	0.262185	6036	5250	4066.26	3520.86	0.569776	0.576253	5358	4225	4611.61	4925.24	0.216379	-0.221195	1	1	1	0.0184	SPAR	NA	0.0002	SCER	NA	0.0002	SCER	NA	0.7414	SPAR	NA	0.024538	0.000685507	0.000243994	0.877562
Scer_11.118	Spar_11.141	YKL117W	S000001600	SBA1	362	338	94322	87992	93551.8	97317.4	-0.0871374	-0.244291	72874	113360	60257.2	94574.6	0.175301	0.162418	61457	36364	54978.2	37695.3	0.0617494	-0.150839	55519	81021	44029.1	50169.9	0.235552	0.592496	1	1	1	0.0652	SPAR	NA	0.4496	SCER	NA	0.0002	SCER	NA	0.8772	SCER	NA	0.081147	0.550935	0.000243994	0.966283
Scer_11.119	Spar_11.142	YKL116C	S000001599	PRR1	1164	1164	13132	18493	18216.8	20072.1	-0.472154	-0.118204	10164	12573	13175.3	16117.9	-0.374335	-0.358305	4003	2436	5243.17	3043.08	-0.389273	-0.320901	3022	3605	3346.14	5378.98	-0.146949	-0.577202	1	1	1	0.0388	SPAR	NA	NA	NA	REPS_DISAGREE	NA	NA	REPS_DISAGREE	0.0002	SCER	NA	0.049756	NA	NA	0.000633882
Scer_11.12	Spar_11.15	YKL215C	S000001698	OXP1	3257	3257	25939	32817	21164.5	20708.3	0.293462	0.664211	15556	16995	12759.6	14954.1	0.285872	0.184555	12251	7942	7748.28	5847.27	0.660884	0.441673	22112	18920	11284.7	14360.4	0.9704	0.397797	1	1	1	0.0002	SCER	NA	NA	NA	REPS_DISAGREE	0.0402	SPAR	NA	NA	NA	REPS_DISAGREE	0.000334064	NA	0.0430343	NA
Scer_11.121	Spar_11.144	YKL114C	S000001597	APN1	928	928	28441	23489	17039.5	19314.8	0.739053	0.282265	21867	30592	10927.7	18375.7	1.00069	0.73532	14803	10671	8313.03	6857.27	0.832367	0.637914	16166	17264	8864.71	7667.7	0.866743	1.1708	1	1	1	0.0002	SCER	NA	0.2026	SCER	NA	NA	NA	REPS_DISAGREE	0.9448	SPAR	NA	0.000334064	0.286572	NA	0.994853
Scer_11.122	Spar_11.145	YKL113C	S000001596	RAD27	851	851	32650	30887	25607.9	24494.6	0.350482	0.334524	21104	25821	13906.3	24708.8	0.601743	0.0635156	8660	5032	11562.4	5112.46	-0.416961	-0.0228811	11581	10518	10428.9	11527	0.151152	-0.132143	1	1	1	0.0002	SCER	NA	0.0004	SPAR	NA	NA	NA	REPS_DISAGREE	NA	NA	REPS_DISAGREE	0.000334064	0.00125798	NA	NA
Scer_11.123	Spar_11.146	YKL112W	S000001595	ABF1	1729	1697	42056	54243	56739.3	74899.1	-0.458978	-0.492455	27717	36060	17753.6	25712	0.615682	0.460993	20426	8321	24928	18073	-0.314299	-1.14587	19896	20743	15309.5	17575.3	0.351083	0.21211	1	1	1	0.0002	SPAR	NA	NA	NA	REPS_DISAGREE	0.0002	SCER	NA	0.0036	SCER	NA	0.000334064	NA	0.000243994	0.00888132
Scer_11.124	Spar_11.147	YKL110C	S000001593	KTI12	660	660	23915	29152	21822.1	21031.8	0.13212	0.471003	18637	27880	19999.4	26882.6	-0.101781	0.0525583	8770	4302	4915.41	4530.86	0.835136	-0.0747594	8640	6615	8849.78	9714.53	-0.0346056	-0.554333	1	1	1	0.0002	SCER	NA	NA	NA	REPS_DISAGREE	0.0002	SPAR	NA	0.4836	SPAR	NA	0.000334064	NA	0.000243994	0.647576
Scer_11.125	Spar_11.148	YKL109W	S000001592	HAP4	1316	1313	91079	121553	83121.8	104186	0.128598	0.219124	34715	40708	102211	94911.3	-1.56118	-1.22454	10254	9677	9176.31	7757.39	0.156892	0.315659	6380	4558	21143.9	16763.8	-1.73174	-1.88193	1	1	1	0.0002	SCER	NA	0.6554	SCER	NA	0.0002	SPAR	NA	0.0002	SPAR	NA	0.000334064	0.734259	0.000243994	0.000633882
Scer_11.126	Spar_11.149	YKL108W	S000001591	SLD2	1200	1221	11949	14032	13401.5	17389.4	-0.140465	-0.284437	10430	14085	9194.65	16262.1	0.206883	-0.182315	3735	2559	2437.54	1358.75	0.640509	0.937828	4000	3622	3777.21	3248.32	0.107685	0.182074	1	1	1	0.0002	SPAR	NA	0.0002	SCER	NA	NA	NA	REPS_DISAGREE	0.0002	SPAR	NA	0.000334064	0.000685507	NA	0.000633882
Scer_11.127	Spar_11.150	YKL107W	S000001590	NA	866	866	532	1287	130.921	241.175	2.01446	2.41101	646	1224	171.49	144.285	1.90725	3.07582	455	0	57.4843	136.077	2.96291	-7.09884	91	171	57.6185	43.3722	0.650278	1.95468	0	0	0	NA	NA	NA	NA	NA	NA	NA	NA	NA	NA	NA	NA	NA	NA	NA	NA
Scer_11.129	Spar_11.152	YKL106W	S000001589	AAT1	1052	1052	25022	27703	36288.8	36157.3	-0.536311	-0.384234	9549	12842	23644.9	37757.2	-1.30802	-1.55581	6566	3971	6547.16	7274.57	0.00414562	-0.873195	7636	6085	9161.34	10297.1	-0.26271	-0.758817	1	1	1	0.0002	SPAR	NA	NA	NA	REPS_DISAGREE	0.0002	SPAR	NA	0.0002	SCER	NA	0.000334064	NA	0.000243994	0.000633882
Scer_11.13	Spar_11.16	YKL214C	S000001697	YRA2	451	448	15431	9692	10896.2	11147.6	0.492342	-0.211479	10284	16198	6157.19	9356.2	0.730335	0.782127	7795	4710	7282.35	4453.24	0.0885032	0.0712245	8887	11701	7037.99	6707.67	0.326861	0.793028	1	1	1	NA	NA	REPS_DISAGREE	NA	NA	REPS_DISAGREE	0.0002	SCER	NA	0.0028	SPAR	NA	NA	NA	0.000243994	0.00710283
Scer_11.130	Spar_11.153	YKL105C	S000001588	SEG2	3104	3077	22293	21202	23888.1	35644.2	-0.112299	-0.762044	13873	16977	14050.1	15778.6	-0.0309004	0.0930007	7405	4062	11029.9	7667.68	-0.587391	-0.929037	8165	10895	13329.1	11670	-0.719588	-0.111737	1	1	1	0.0016	SPAR	NA	0.0438	SPAR	NA	0.0002	SCER	NA	0.9386	SCER	NA	0.00241273	0.076902	0.000243994	0.991215
Scer_11.131	Spar_11.154	YKL104C	S000001587	GFA1	1291	1291	69228	62726	100167	94734	-0.532977	-0.59481	39295	46748	86373	96322.4	-1.13622	-1.04295	31782	18784	41918.1	24809.3	-0.399354	-0.40136	50409	30266	90599.8	98147.8	-0.845813	-1.69723	1	1	1	0.0002	SPAR	NA	0.0118	SCER	NA	0.0002	SPAR	NA	NA	NA	REPS_DISAGREE	0.000334064	0.024141	0.000243994	NA
Scer_11.132	Spar_11.155	YKL103C	S000001586	APE1	1042	1042	9184	11286	7648.94	6738.99	0.263831	0.743843	18235	24278	12035.5	14593.4	0.599374	0.734293	4905	4159	6216.37	2762.87	-0.341757	0.589896	21757	23190	22735.8	20317.8	-0.0634855	0.190752	1	1	1	0.0002	SCER	NA	0.192	SPAR	NA	NA	NA	REPS_DISAGREE	0.0002	SPAR	NA	0.000334064	0.274037	NA	0.000633882
Scer_11.134	Spar_11.157	YKL101W	S000001584	HSL1	4048	4063	76678	91451	70600	93664.1	0.124479	-0.0291603	39475	43119	42321.7	52130.7	-0.0951198	-0.268469	16828	13507	13414	11381.1	0.332438	0.252387	20875	17641	23839.1	25082.4	-0.18621	-0.502386	1	1	1	NA	NA	REPS_DISAGREE	0.0002	SCER	NA	0.0002	SPAR	NA	0.5944	SPAR	NA	NA	0.000685507	0.000243994	0.757122
Scer_11.135	Spar_11.158	YKL100C	S000001583	NA	1653	1668	38215	36218	29070.4	30443.6	0.407611	0.263594	39054	48245	14047.5	13628.1	1.48813	1.83675	12061	8494	7467.91	5392.68	0.704531	0.668377	31289	18260	3194.63	3767.54	3.30456	2.28972	1	1	1	0.0002	SCER	NA	0.0002	SCER	NA	0.0002	SCER	NA	NA	NA	REPS_DISAGREE	0.000334064	0.000685507	0.000243994	NA
Scer_11.136	Spar_11.159	YKL099C	S000001582	UTP11	612	612	23855	22418	22333.9	21322.6	0.0950533	0.0722701	12733	21867	14581	25027.5	-0.195503	-0.194748	11671	6864	11327.4	5688.01	0.0431041	0.271081	8130	7649	12112.7	13050.8	-0.575134	-0.770722	1	1	1	0.1568	SCER	NA	NA	NA	REPS_DISAGREE	0.0002	SPAR	NA	0.5058	SPAR	NA	0.185598	NA	0.000243994	0.668873
Scer_11.137	Spar_11.160	YKL098W	S000001581	MTC2	898	898	11241	8369	17943.1	13698.3	-0.674609	-0.710805	12109	15054	12602.8	21547.4	-0.0576596	-0.517341	1985	972	3038.6	2053.25	-0.614015	-1.0781	2301	2228	3683.32	3926.01	-0.678509	-0.817036	1	1	1	0.0002	SPAR	NA	NA	NA	REPS_DISAGREE	0.0002	SCER	NA	0.0002	SCER	NA	0.000334064	NA	0.000243994	0.000633882
Scer_11.139	Spar_11.161	YKL096W-A	S000001956	CWP2	128	157	157834	91406	298893	216188	-0.626596	-0.947294	237729	402829	238838	306506	0.287905	0.68887	250679	156519	616739	463690	-1.00419	-1.27219	722611	1064642	618579	435652	0.518881	1.58374	1	1	0	0.0002	SPAR	NA	0.001	SPAR	NA	0.0002	SCER	NA	0.0006	SCER	NA	0.000334064	0.00279882	0.000243994	0.00172141
Scer_11.14	Spar_11.17	YKL213C	S000001696	DOA1	1868	1874	49902	48385	35879.2	37281.8	0.480564	0.380705	31262	40177	29009.6	39086.7	0.112505	0.0443185	17264	10157	18192.3	9725.97	-0.0709273	0.0671805	16247	17000	17202.3	17824.7	-0.0777988	-0.0637129	1	1	1	0.0002	SCER	NA	0.0002	SPAR	NA	0.0002	SPAR	NA	0.8952	SPAR	NA	0.000334064	0.000685507	0.000243994	0.973625
Scer_11.140	Spar_11.162	YKL096W	S000001579	CWP1	568	541	77708	62375	61603.2	48139.6	0.264792	0.303473	66644	130920	102476	125031	-0.690991	-0.00386101	67900	31691	52938	20670.6	0.28884	0.546207	108510	124024	99598.9	97419.3	0.0533624	0.278075	1	1	1	0.0002	SCER	NA	0.805	SCER	NA	0.0002	SPAR	NA	NA	NA	REPS_DISAGREE	0.000334064	0.859127	0.000243994	NA
Scer_11.141	Spar_11.163	YKL095W	S000001578	YJU2	712	712	3907	5056	6713.65	5993.63	-0.780883	-0.24539	3900	5105	6176.25	8699.19	-0.66312	-0.768854	2068	2126	3984.57	4096.42	-0.945852	-0.945895	3300	3165	4833.55	4312.19	-0.550479	-0.446095	1	1	1	0.0034	SPAR	NA	0.0288	SPAR	NA	NA	NA	REPS_DISAGREE	0.0002	SCER	NA	0.00493394	0.0529231	NA	0.000633882
Scer_11.142	Spar_11.164	YKL094W	S000001577	YJU3	820	820	33987	31728	29177.5	34233.9	0.220121	-0.109665	34943	49369	29589.9	48916.1	0.239893	0.0132957	9949	6961	10621.5	7440.89	-0.0943523	-0.0961666	16967	15664	14778.1	15628.6	0.19926	0.00326658	1	1	1	NA	NA	REPS_DISAGREE	NA	NA	REPS_DISAGREE	NA	NA	REPS_DISAGREE	NA	NA	REPS_DISAGREE	NA	NA	NA	NA
Scer_11.143	Spar_11.165	YKL093W	S000001576	MBR1	827	827	1015	1995	724.031	374.168	0.486785	2.4115	1046	2117	251.173	413.102	2.05378	2.35464	112	56	200.691	438.47	-0.835822	-2.94673	550	168	179.258	176.825	1.61199	-0.0734343	0	0	0	NA	NA	NA	NA	NA	NA	NA	NA	NA	NA	NA	NA	NA	NA	NA	NA
Scer_11.144	Spar_11.166	YKL092C	S000001575	BUD2	2760	2760	19411	24917	21371.8	20290.4	-0.138828	0.296318	7354	11228	9056.07	10903.8	-0.300319	0.0422615	4435	4647	4123.74	2831.41	0.104956	0.714581	6276	6001	4507.05	4350.14	0.477572	0.464049	1	1	1	NA	NA	REPS_DISAGREE	0.0006	SCER	NA	NA	NA	REPS_DISAGREE	0.9726	SCER	NA	NA	0.00177375	NA	1
Scer_11.145	Spar_11.167	YKL091C	S000001574	NA	630	630	5640	5906	5710.92	6757.85	-0.018025	-0.194352	8987	12966	4086.32	5792.02	1.13685	1.16246	3230	3386	3270.55	1336.58	-0.0179948	1.34039	4734	6371	2567.22	2413.41	0.882593	1.40008	1	1	1	0.7014	SPAR	NA	0.993	SCER	NA	0.0002	SCER	NA	0.2294	SPAR	NA	0.735819	0.995705	0.000243994	0.358055
Scer_11.146	Spar_11.168	YKL090W	S000001573	CUE2	1261	1261	15066	14050	15756.1	17037	-0.0646108	-0.278087	9085	12455	11348.7	20974.6	-0.320933	-0.751871	1318	2082	2647.3	1338.59	-1.00562	0.636868	1337	1358	3529.67	4174.15	-1.39986	-1.61928	1	1	1	0.0122	SPAR	NA	NA	NA	REPS_DISAGREE	0.0002	SPAR	NA	0.7864	SPAR	NA	0.016611	NA	0.000243994	0.911601
Scer_11.147	Spar_11.169	YKL089W	S000001572	MIF2	1260	1260	11498	11169	10650.2	11864.2	0.110492	-0.0871074	6750	10169	6810.24	11844.3	-0.0128161	-0.219991	3611	3257	4810.53	2806.21	-0.413697	0.214851	3462	3045	3393.09	3914.34	0.0289976	-0.36222	1	1	1	NA	NA	REPS_DISAGREE	NA	NA	REPS_DISAGREE	NA	NA	REPS_DISAGREE	NA	NA	REPS_DISAGREE	NA	NA	NA	NA
Scer_11.149	Spar_11.172	YKL087C	S000001570	CYT2	482	482	13915	11333	14006.5	7950.82	-0.00945837	0.5113	8247	13322	9223.23	14654.4	-0.161384	-0.137512	9020	5420	8602.47	3648.88	0.0683684	0.570711	7959	9365	8175.43	8731.98	-0.0387019	0.100959	1	1	1	NA	NA	REPS_DISAGREE	0.5428	SCER	NA	0.0016	SPAR	NA	0.3318	SPAR	NA	NA	0.634564	0.00185949	0.482912
Scer_11.15	Spar_11.18	YKL212W	S000001695	SAC1	1338	1338	72882	83924	84129.5	100726	-0.207046	-0.263272	44881	57631	44017.5	52374.7	0.0280254	0.137974	36743	23918	42262	32709.9	-0.201888	-0.451613	57732	47958	43429.4	47093	0.41069	0.0262589	1	1	1	0.0002	SPAR	NA	NA	NA	REPS_DISAGREE	0.0002	SCER	NA	0.1584	SCER	NA	0.000334064	NA	0.000243994	0.264721
Scer_11.150	Spar_11.173	YKL086W	S000001569	SRX1	217	217	691	473	2458.73	1414.3	-1.82966	-1.57814	687	1283	2084.73	2989.62	-1.60007	-1.2198	1227	655	1675.11	2085.5	-0.448808	-1.66932	1199	942	3843.37	2296.64	-1.67971	-1.28482	0	0	0	NA	NA	NA	NA	NA	NA	NA	NA	NA	NA	NA	NA	NA	NA	NA	NA
Scer_11.151	Spar_11.174	YKL085W	S000001568	MDH1	800	800	59302	53634	49008	50140.5	0.275059	0.0971698	34256	47786	44902.7	51819.8	-0.390436	-0.116914	44988	21986	35521.2	21940.6	0.340849	0.00297967	36968	45695	37932.2	29629.9	-0.0371444	0.624968	1	1	1	0.0076	SCER	NA	NA	NA	REPS_DISAGREE	0.0002	SPAR	NA	0.799	SCER	NA	0.0106073	NA	0.000243994	0.917131
Scer_11.152	Spar_11.175	YKL084W	S000001567	HOT13	323	323	6922	10109	2324.83	2284.71	1.57365	2.14507	6720	14146	377.625	847.675	4.14983	4.05914	4837	1392	939.918	1663.16	2.36227	-0.256601	6053	5701	362.783	441.228	4.05674	3.6886	1	1	1	0.0002	SCER	NA	NA	NA	REPS_DISAGREE	0.0002	SCER	NA	0.0002	SPAR	NA	0.000334064	NA	0.000243994	0.000633882
Scer_11.153	Spar_11.176	YKL082C	S000001565	RRP14	1070	1066	71104	73987	67887.4	78049.3	0.0613836	-0.0825154	33048	34987	22112.7	40296.8	0.574262	-0.209244	31187	17521	32829.6	28833.2	-0.0794523	-0.724016	17937	19119	26250.6	26932	-0.554788	-0.499697	1	1	1	NA	NA	REPS_DISAGREE	0.015	SPAR	NA	NA	NA	REPS_DISAGREE	0.9996	SPAR	NA	NA	0.0298863	NA	1
Scer_11.154	Spar_11.177	YKL081W	S000001564	TEF4	821	817	650179	573165	598844	495526	0.11161	0.202942	339261	486115	357036	480862	-0.0807185	0.00862845	351400	225888	474661	326915	-0.440828	-0.540353	426071	351918	527263	555083	-0.314474	-0.664509	1	1	1	0.0004	SCER	NA	0.0002	SPAR	NA	0.0004	SPAR	NA	NA	NA	REPS_DISAGREE	0.000643008	0.000685507	0.000478845	NA
Scer_11.155	Spar_11.178	YKL080W	S000001563	VMA5	647	647	81992	73672	83146.6	85311.3	-0.0201732	-0.211618	67222	87740	46252.1	65699.6	0.539404	0.417346	45610	26611	40830	30725.2	0.159718	-0.20739	73810	59244	52556.6	61958.8	0.489936	-0.0646388	1	1	1	0.547	SPAR	NA	0.9664	SCER	NA	0.0002	SCER	NA	NA	NA	REPS_DISAGREE	0.588277	0.978802	0.000243994	NA
Scer_11.156	Spar_11.179	YKL079W	S000001562	SMY1	1528	1528	18709	26950	21436.3	25000.8	-0.196313	0.108308	13578	21112	24384.5	31214.5	-0.844648	-0.564133	4943	3216	5357.13	2837.46	-0.116051	0.18061	5954	4737	6231.33	6163.02	-0.0656712	-0.379592	1	1	1	NA	NA	REPS_DISAGREE	0.5494	SCER	NA	0.0002	SPAR	NA	0.0004	SCER	NA	NA	0.641012	0.000243994	0.00118809
Scer_11.157	Spar_11.180	YKL078W	S000001561	DHR2	1776	1773	38507	36235	41483	44029.7	-0.109837	-0.283527	10386	11457	22460.9	33874.4	-1.11514	-1.56632	11519	6714	11885.1	7997.29	-0.047577	-0.254743	7311	5868	11265.5	13530	-0.626139	-1.20752	1	1	1	0.0002	SPAR	NA	0.733	SCER	NA	0.0002	SPAR	NA	0.0002	SCER	NA	0.000334064	0.802567	0.000243994	0.000633882
Scer_11.158	Spar_11.181	YKL077W	S000001560	NA	976	976	52190	59013	51598.6	50128.6	0.0164402	0.235395	37696	44784	28899.6	42893.1	0.383352	0.0622379	36489	18992	24318.9	18441.9	0.585365	0.0423985	45730	39326	19741.8	24956.1	1.21185	0.656071	1	1	1	0.533	SCER	NA	NA	NA	REPS_DISAGREE	NA	NA	REPS_DISAGREE	0.0818	SCER	NA	0.574984	NA	NA	0.149403
Scer_11.159	Spar_11.182	YKL075C	S000001558	NA	1111	1099	21632	21278	19019.2	18174.4	0.170033	0.211773	14915	19748	10428.9	15357.8	0.500474	0.347049	2883	2804	3597.31	2322.38	-0.334914	0.256109	4543	3302	2827.57	3219.13	0.66822	0.0209901	1	1	1	0.0004	SCER	NA	NA	NA	REPS_DISAGREE	0.0002	SCER	NA	NA	NA	REPS_DISAGREE	0.000643008	NA	0.000243994	NA
Scer_11.16	Spar_11.19	YKL211C	S000001694	TRP3	1042	1042	38155	33755	43114.6	44796.9	-0.176299	-0.408288	24514	35578	21185.1	29788.9	0.210547	0.256204	20688	12906	24959.3	17601.3	-0.27077	-0.44761	26340	25486	23574.5	26142.6	0.160021	-0.0366943	1	1	1	0.0002	SPAR	NA	0.6026	SPAR	NA	0.0002	SCER	NA	0.549	SCER	NA	0.000334064	0.688145	0.000243994	0.713462
Scer_11.160	Spar_11.183	YKL074C	S000001557	MUD2	1300	1300	19231	19772	25028.7	27912.7	-0.38013	-0.497443	13102	17598	17091	26314.9	-0.383423	-0.580439	9142	6291	10312.9	8622.24	-0.173848	-0.454711	6818	7423	13555.3	12326.4	-0.99133	-0.731606	1	1	1	0.0002	SPAR	NA	0.651	SCER	NA	NA	NA	REPS_DISAGREE	NA	NA	REPS_DISAGREE	0.000334064	0.730368	NA	NA
Scer_11.161	Spar_11.184	YKL073W	S000001556	LHS1	2117	2117	36058	37347	41555.4	42713.7	-0.204712	-0.193702	20268	24258	20870.7	29732.2	-0.0422734	-0.293554	22622	13404	28169.3	18988.3	-0.316385	-0.502413	26468	23585	27038	31373.9	-0.030739	-0.411681	1	1	1	0.0002	SPAR	NA	0.0194	SPAR	NA	NA	NA	REPS_DISAGREE	0.0002	SCER	NA	0.000334064	0.0373624	NA	0.000633882
Scer_11.162	Spar_11.185	YKL072W	S000001555	STB6	1787	1820	12868	12569	22246.6	28517.2	-0.763351	-1.1555	10609	13725	11978.3	17324.5	-0.148724	-0.309589	2329	1655	2972.04	2447.37	-0.325209	-0.537719	3726	3763	3536.07	4460.24	0.101859	-0.21878	1	1	1	0.0002	SPAR	NA	0.0002	SCER	NA	0.0002	SCER	NA	0.0002	SCER	NA	0.000334064	0.000685507	0.000243994	0.000633882
Scer_11.17	Spar_11.20	YKL210W	S000001693	UBA1	2109	2112	108339	113424	111276	109180	-0.0365344	0.0570725	73921	101534	56219.3	70158.7	0.396962	0.535314	124031	77354	86903.1	41805.8	0.515267	0.889806	198385	187530	89155	98268.4	1.15596	0.934366	1	1	1	NA	NA	REPS_DISAGREE	0.0002	SCER	NA	0.0002	SCER	NA	0.5654	SPAR	NA	NA	0.000685507	0.000243994	0.729056
Scer_11.174	Spar_11.198	YKL068W	S000001551	NUP100	2503	2610	75147	91004	64219.6	66781.5	0.28709	0.506866	26823	36355	37810.1	48222.2	-0.434895	-0.347141	42820	24311	35877.2	28524.7	0.315601	-0.170204	23285	28995	34193.4	31371	-0.493905	-0.0532318	1	1	1	0.0002	SCER	NA	NA	NA	REPS_DISAGREE	0.0002	SPAR	NA	NA	NA	REPS_DISAGREE	0.000334064	NA	0.000243994	NA
Scer_11.18	Spar_11.21	YKL209C	S000001692	STE6	3380	3380	5938	4881	5112.85	6462.09	0.21581	-0.404752	3828	4527	4435.36	5267.27	-0.212409	-0.218454	154	824	214.81	60.4786	-0.477491	3.74624	329	171	369.185	602.623	-0.165781	-1.81124	1	0	0	NA	NA	REPS_DISAGREE	NA	NA	LOW_COV	NA	NA	REPS_DISAGREE	NA	NA	LOW_COV	NA	NA	NA	NA
Scer_11.182	Spar_11.202	YKL067W	S000001550	YNK1	385	385	36316	28321	41454.3	41444.3	-0.19091	-0.549286	38856	66271	28223.1	49159.2	0.461245	0.43091	20491	10862	26579.9	12789.2	-0.37533	-0.235618	22315	27189	26594.1	24568.2	-0.253084	0.146223	1	1	1	0.0002	SPAR	NA	NA	NA	REPS_DISAGREE	0.0002	SCER	NA	NA	NA	REPS_DISAGREE	0.000334064	NA	0.000243994	NA
Scer_11.184	Spar_11.204	YKL065C	S000001548	YET1	406	406	20686	19970	17288.5	18879.1	0.25883	0.0810397	29474	45067	19185.2	25450.9	0.619419	0.824332	11226	5511	9948.81	7031.65	0.174231	-0.351492	17060	14451	11003	15211.1	0.632674	-0.0739515	1	1	1	0.2182	SCER	NA	0.5678	SPAR	NA	0.0002	SCER	NA	0.8512	SPAR	NA	0.252729	0.657292	0.000243994	0.952298
Scer_11.185	Spar_11.205	YKL064W	S000001547	MNR2	2053	2053	31588	31428	37732.9	46436.5	-0.25644	-0.563195	14291	17425	22302.4	27548.2	-0.642055	-0.660767	5898	6589	7030.23	6530.68	-0.253306	0.0128237	7574	7153	7938.55	9062.28	-0.0678113	-0.341283	1	1	1	0.0002	SPAR	NA	0.9592	SCER	NA	0.0164	SPAR	NA	0.0002	SCER	NA	0.000334064	0.972357	0.0179703	0.000633882
Scer_11.186	Spar_11.206	YKL063C	S000001546	NA	294	294	10510	13120	13378.7	14863.5	-0.348147	-0.179993	12403	18926	11502.8	18413.5	0.108691	0.0396009	4500	1742	7861.23	3522.88	-0.804692	-1.01559	5146	4397	7654.73	9534.78	-0.572807	-1.1165	1	1	1	0.0032	SPAR	NA	0.0006	SPAR	NA	0.0004	SCER	NA	NA	NA	REPS_DISAGREE	0.00465334	0.00177375	0.000478845	NA
Scer_11.187	Spar_11.207	YKL062W	S000001545	MSN4	1415	1418	9143	11335	4586.19	5974.78	0.998269	0.926769	8765	10342	16812.1	14449.1	-0.93654	-0.479372	4910	3064	2185.41	2109.7	1.17051	0.541224	10327	7436	19033.3	18250.9	-0.878986	-1.2922	1	1	1	0.0002	SCER	NA	NA	NA	REPS_DISAGREE	0.0002	SPAR	NA	0.7174	SPAR	NA	0.000334064	NA	0.000243994	0.862417
Scer_11.188	Spar_11.208	YKL061W	S000001544	BLI1	253	253	3443	2965	3512.05	4017.59	-0.028638	-0.438171	3313	6286	2024.97	3078.94	0.709961	1.02947	103	196	725.109	277.194	-2.8036	-0.497894	537	782	512.164	541.318	0.0681848	0.529874	1	0	0	0.5972	SPAR	NA	NA	NA	LOW_COV	0.0002	SCER	NA	NA	NA	LOW_COV	0.638543	NA	0.000243994	NA
Scer_11.190	Spar_11.210	YKL059C	S000001542	MPE1	1043	1043	16582	15279	15471.5	15573.1	0.100003	-0.0275069	13058	20953	12472	17747.9	0.0662343	0.239493	8449	5126	9758.21	9057.68	-0.207813	-0.821186	8561	9781	11508.8	9641.96	-0.426838	0.0206529	1	1	1	NA	NA	REPS_DISAGREE	0.0002	SPAR	NA	NA	NA	REPS_DISAGREE	NA	NA	REPS_DISAGREE	NA	0.000685507	NA	NA
Scer_11.191	Spar_11.211	YKL058W	S000001541	TOA2	243	243	15021	16807	11459.5	11960.5	0.390403	0.490753	10324	17100	6203.96	10668.5	0.734648	0.680586	5146	3103	5057.61	2592.52	0.0249914	0.259219	8020	10234	3809.22	3847.61	1.07391	1.4111	1	1	1	0.0002	SCER	NA	0.2464	SPAR	NA	0.001	SCER	NA	0.411	SCER	NA	0.000334064	0.337427	0.00117465	0.573399
Scer_11.192	Spar_11.212	YKL057C	S000001540	NUP120	2267	2267	52028	61456	45978	50055.1	0.178342	0.29603	23559	30907	25500.9	31964.3	-0.114267	-0.0485269	15667	11380	12484.2	8359.15	0.327605	0.445026	15979	11919	14656.4	17456.9	0.124634	-0.550494	1	1	1	0.0002	SCER	NA	0.0502	SCER	NA	0.0002	SPAR	NA	0.003	SPAR	NA	0.000334064	0.0867858	0.000243994	0.00754622
Scer_11.193	Spar_11.213	YKL056C	S000001539	TMA19	109	109	194518	203071	168828	183040	0.204346	0.149828	111420	171184	125808	223241	-0.175214	-0.383052	93580	48357	118260	63526.7	-0.33769	-0.393632	59838	91699	84165.7	98031.1	-0.492163	-0.0963321	1	1	1	0.0182	SCER	NA	0.0138	SPAR	NA	0.0002	SPAR	NA	0.214	SCER	NA	0.0242805	0.0277762	0.000243994	0.338133
Scer_11.194	Spar_11.214	YKL055C	S000001538	OAR1	668	668	1578	1225	2569.82	3263.3	-0.703215	-1.41281	750	689	1012.49	1757.19	-0.43244	-1.34942	1268	477	2036.15	917.259	-0.682863	-0.941891	1157	1676	1030.73	1228.18	0.166568	0.448183	1	0	0	0.0002	SPAR	NA	NA	NA	LOW_COV	NA	NA	LOW_COV	NA	NA	LOW_COV	0.000334064	NA	NA	NA
Scer_11.195	Spar_11.215	YKL054C	S000001537	DEF1	1483	1477	143573	172057	144627	153334	-0.0163985	0.160355	67520	84659	80199.4	87314	-0.254122	-0.0503976	136505	103638	200106	122014	-0.557655	-0.241336	146607	132433	234443	205966	-0.68313	-0.642986	1	1	1	NA	NA	REPS_DISAGREE	0.0002	SPAR	NA	0.0002	SPAR	NA	0.0008	SPAR	NA	NA	0.000685507	0.000243994	0.00225204
Scer_11.197	Spar_11.217	YKL052C	S000001535	ASK1	599	584	17452	13733	13092.1	9393.9	0.378084	0.511215	9729	13618	11648.3	19508.6	-0.296324	-0.555148	3528	2704	3517.63	2304.24	-0.0323438	0.194127	4302	5218	7772.1	4794.71	-0.889734	0.085442	1	1	1	0.0002	SCER	NA	0.0238	SPAR	NA	0.0002	SPAR	NA	NA	NA	REPS_DISAGREE	0.000334064	0.0444605	0.000243994	NA
Scer_11.198	Spar_11.218	YKL051W	S000001534	SFK1	878	878	26375	23598	20004.1	18508.9	0.398859	0.350428	4016	4166	12874.8	11780.7	-1.68047	-1.49947	7605	3720	9142.02	4815.11	-0.265532	-0.372177	3352	2116	10367.1	13176	-1.62862	-2.63792	1	1	1	0.0002	SCER	NA	0.0002	SPAR	NA	0.0002	SPAR	NA	NA	NA	REPS_DISAGREE	0.000334064	0.000685507	0.000243994	NA
Scer_11.199	Spar_11.219	YKL050C	S000001533	NA	2650	2647	5705	2941	8759.79	10282.2	-0.620215	-1.80705	2373	3563	6333.88	7697.78	-1.41763	-1.11277	0	235	0	87.694	-0.00163416	1.41024	116	87	614.597	151.803	-2.39711	-0.797727	1	0	0	0.0002	SPAR	NA	NA	NA	LOW_COV	NA	NA	REPS_DISAGREE	NA	NA	LOW_COV	0.000334064	NA	NA	NA
Scer_11.20	Spar_11.23	YKL208W	S000001691	CBT1	783	783	4458	6195	4913.49	6650.66	-0.140323	-0.102378	5447	9278	5591.62	8359.95	-0.0377975	0.150302	1437	1054	1646.87	1549.26	-0.196542	-0.555268	1779	2774	1978.24	2254.52	-0.153066	0.299029	1	0	0	0.1724	SPAR	NA	NA	NA	LOW_COV	0.0276	SCER	NA	NA	NA	LOW_COV	0.203035	NA	0.0297537	NA
Scer_11.200	Spar_11.220	YKL049C	S000001532	CSE4	453	453	7079	8211	8191.47	6346.96	-0.210549	0.37144	6790	8970	7452.89	14513.5	-0.13437	-0.694158	4629	2281	4652.19	4419.98	-0.00720868	-0.954067	4225	4608	5053.36	6037.07	-0.258235	-0.389634	1	1	1	NA	NA	REPS_DISAGREE	NA	NA	REPS_DISAGREE	NA	NA	REPS_DISAGREE	0.0408	SCER	NA	NA	NA	NA	0.0803474
Scer_11.201	Spar_11.221	YKL048C	S000001531	ELM1	1648	1648	9851	10656	14885.3	12973.8	-0.595496	-0.283911	6096	8622	8226.33	11957.6	-0.432325	-0.471791	2165	952	2195.5	2681.22	-0.0201706	-1.49288	2885	2266	3461.38	3253.33	-0.262692	-0.521575	1	1	1	0.0002	SPAR	NA	NA	NA	REPS_DISAGREE	NA	NA	REPS_DISAGREE	0.0002	SCER	NA	0.000334064	NA	NA	0.000633882
Scer_11.202	Spar_11.222	YKL047W	S000001530	ANR2	1224	1224	16861	17810	26061.2	27989.2	-0.628181	-0.652151	12355	19653	13869.1	21585.2	-0.166762	-0.135288	5104	2292	7325.72	4701.2	-0.521256	-1.0361	5310	4243	6389.25	7478.78	-0.266889	-0.817571	1	1	1	0.0002	SPAR	NA	NA	NA	REPS_DISAGREE	0.0002	SCER	NA	0.0002	SCER	NA	0.000334064	NA	0.000243994	0.000633882
Scer_11.203	Spar_11.223	YKL046C	S000001529	DCW1	1026	1002	54004	58416	55784.1	56792.1	-0.0809358	0.00652321	43986	57991	39874.9	60966.5	0.107411	-0.106334	18403	13049	29768.8	19944.8	-0.727978	-0.646186	28466	31648	31126.8	32971.6	-0.163061	-0.0932557	1	1	1	NA	NA	REPS_DISAGREE	0.0002	SPAR	NA	NA	NA	REPS_DISAGREE	0.0002	SCER	NA	NA	0.000685507	NA	0.000633882
Scer_11.204	Spar_11.224	YKL045W	S000001528	PRI2	893	893	13848	12352	13873.6	13409.5	-0.00266742	-0.118502	11801	16658	13568.5	17948	-0.201338	-0.107605	5920	4571	6038.87	3571.26	-0.0286777	0.355987	6727	4820	6248.41	8775.35	0.106458	-0.864289	1	1	1	0.9314	SPAR	NA	NA	NA	REPS_DISAGREE	NA	NA	REPS_DISAGREE	NA	NA	REPS_DISAGREE	0.942149	NA	NA	NA
Scer_11.206	Spar_11.226	YKL043W	S000001526	PHD1	718	718	30795	30110	4393.78	2565.58	2.80888	3.55237	12270	17142	1589.32	1425.67	2.94787	3.58689	6649	7126	2312.48	1785.13	1.52329	1.99646	5037	5461	2082.8	1813.29	1.27363	1.59002	1	1	1	0.0002	SCER	NA	0.0002	SPAR	NA	NA	NA	REPS_DISAGREE	0.0002	SPAR	NA	0.000334064	0.000685507	NA	0.000633882
Scer_11.207	Spar_11.227	YKL042W	S000001525	SPC42	845	845	10069	14453	15042	18503.9	-0.579028	-0.356442	10707	15806	8279.17	12430	0.370958	0.346622	5117	3585	5276.45	3852.49	-0.0442613	-0.103789	7385	6692	4874.1	5737.22	0.599362	0.22205	1	1	1	0.0002	SPAR	NA	0.0608	SCER	NA	0.0002	SCER	NA	NA	NA	REPS_DISAGREE	0.000334064	0.102416	0.000243994	NA
Scer_11.208	Spar_11.228	YKL041W	S000001524	VPS24	526	526	15023	15207	16376	18384.8	-0.124402	-0.273765	15035	22176	15253.1	25216.4	-0.0207763	-0.185356	5212	2924	6659.1	4095.41	-0.35343	-0.485924	5376	7946	5230.48	7308.62	0.0395823	0.120613	1	1	1	0.0012	SPAR	NA	0.1848	SPAR	NA	NA	NA	REPS_DISAGREE	0.0012	SCER	NA	0.001834	0.265201	NA	0.00326876
Scer_11.209	Spar_11.229	YKL040C	S000001523	NFU1	528	528	19148	18336	19040	16392.9	0.00815687	0.161596	14796	21622	13340.7	21637.6	0.14936	-0.00104175	9988	5502	7771.47	5384.61	0.361967	0.0311077	7004	5747	8817.77	9565.23	-0.332192	-0.73489	1	1	1	0.8376	SCER	NA	NA	NA	REPS_DISAGREE	NA	NA	REPS_DISAGREE	0.4976	SPAR	NA	0.860424	NA	NA	0.661339
Scer_11.21	Spar_11.24	YKL207W	S000001690	EMC3	521	600	31720	34688	38987.6	41610.1	-0.0939348	-0.0588096	34211	55274	24752.6	40332	0.670542	0.658346	12867	7405	14667.6	13922.2	0.014739	-0.707043	26153	18281	15644.5	17288.4	0.944964	0.284216	1	1	1	0.294	SPAR	NA	NA	NA	REPS_DISAGREE	0.0002	SCER	NA	NA	NA	REPS_DISAGREE	0.334555	NA	0.000243994	NA
Scer_11.210	Spar_11.230	YKL039W	S000001522	PTM1	1106	1106	58761	53618	60787.9	63546	-0.0489239	-0.24508	40818	49034	47792.1	59297.8	-0.22756	-0.27419	24270	18490	28803.7	23752	-0.247069	-0.361285	39611	33253	40044.9	41571.8	-0.0157156	-0.322112	1	1	1	0.072	SPAR	NA	0.2278	SPAR	NA	NA	NA	REPS_DISAGREE	0.0002	SCER	NA	0.0890727	0.315981	NA	0.000633882
Scer_11.211	Spar_11.231	YKL038W	S000001521	RGT1	2740	2725	21045	21058	19112.4	22347.9	0.131039	-0.0936834	11034	13048	8805.76	10500.2	0.317483	0.305468	3806	1851	4263.92	2075.42	-0.171784	-0.172937	5630	5750	5424.68	4958.19	0.0456687	0.205789	1	1	1	NA	NA	REPS_DISAGREE	0.5626	SPAR	NA	0.0002	SCER	NA	NA	NA	REPS_DISAGREE	NA	0.65223	0.000243994	NA
Scer_11.213	Spar_11.233	YKL035W	S000001518	UGP1	1024	1024	72228	90776	77768.9	89318	-0.106634	0.0233603	101148	136288	47345.2	61191.5	1.09516	1.15524	44504	29749	45335.9	26633.8	-0.0267194	0.159578	116348	116178	62827.6	62584.3	0.888964	0.892452	1	1	1	NA	NA	REPS_DISAGREE	0.164	SCER	NA	0.0002	SCER	NA	0.0002	SPAR	NA	NA	0.23942	0.000243994	0.000633882
Scer_11.214	Spar_11.234	YKL034W	S000001517	TUL1	1878	1878	13787	17191	18961.7	21165.8	-0.45975	-0.300066	11036	15419	11362.5	13109.3	-0.0420623	0.234098	4100	2944	3415.78	1899.03	0.26334	0.632246	7923	7169	5298.77	5817.29	0.5803	0.301378	1	1	1	0.0002	SPAR	NA	0.0002	SCER	NA	0.0002	SCER	NA	NA	NA	REPS_DISAGREE	0.000334064	0.000685507	0.000243994	NA
Scer_11.215	Spar_11.235	YKL033W-A	S000007242	NA	613	613	64364	52384	40030	38154.2	0.685159	0.457274	41069	64705	26094.2	46060.5	0.654299	0.490339	19417	12708	18519	9472.97	0.0683094	0.42381	18494	21271	12688.9	15304.1	0.543457	0.474942	1	1	1	0.0002	SCER	NA	0.8304	SPAR	NA	NA	NA	REPS_DISAGREE	0.0002	SPAR	NA	0.000334064	0.877523	NA	0.000633882
Scer_11.216	Spar_11.236	YKL033W	S000001516	TTI1	2819	2804	26156	26301	31758.2	33298	-0.287674	-0.348002	10667	13518	18930.6	24395.4	-0.835205	-0.859374	5019	2808	4738.92	2520.95	0.0751266	0.14782	4462	3525	5262.49	7503.8	-0.245703	-1.09748	1	1	1	0.0002	SPAR	NA	0.0002	SCER	NA	0.0002	SPAR	NA	NA	NA	REPS_DISAGREE	0.000334064	0.000685507	0.000243994	NA
Scer_11.22	Spar_11.25	YKL206C	S000001689	ADD66	610	703	17696	14837	16623	18928.7	0.294956	-0.146642	14517	20614	14458	21560.3	0.210589	0.139964	6855	5124	6745.83	5362.44	0.227873	0.139109	8622	9425	8879.65	8549.74	0.16224	0.345313	1	1	1	NA	NA	REPS_DISAGREE	NA	NA	REPS_DISAGREE	NA	NA	REPS_DISAGREE	0.0108	SPAR	NA	NA	NA	NA	0.0244909
Scer_11.220	Spar_11.247	YKL029C	S000001512	MAE1	1557	1560	113338	129886	131303	137139	-0.209485	-0.0756154	44482	57803	142720	196193	-1.67909	-1.76027	75844	56668	75918.6	63770.7	0.00135919	-0.167579	60121	56779	183952	168023	-1.6106	-1.56244	1	1	1	0.0072	SPAR	NA	NA	NA	REPS_DISAGREE	0.0002	SPAR	NA	0.0002	SCER	NA	0.0100812	NA	0.000243994	0.000633882
Scer_11.221	Spar_11.248	YKL028W	S000001511	TFA1	825	803	27060	33483	24866	27002.6	0.0829879	0.271325	20167	24643	17617.6	27725.9	0.155976	-0.209046	6655	8567	6786.17	3382.77	-0.0671489	1.30133	8215	9202	7469.07	7612.23	0.0983211	0.234601	1	1	1	0.0088	SCER	NA	NA	NA	REPS_DISAGREE	NA	NA	REPS_DISAGREE	0.8692	SPAR	NA	0.0121948	NA	NA	0.962443
Scer_11.222	Spar_11.249	YKL027W	S000001510	TCD2	1169	1169	36006	38318	49033.8	54082.7	-0.445528	-0.497133	21799	32635	39829.9	60018.3	-0.86956	-0.878963	13479	5850	13756.9	8536.56	-0.0294393	-0.54514	9845	7731	11457.5	18344.3	-0.218814	-1.2465	1	1	1	0.0002	SPAR	NA	NA	NA	REPS_DISAGREE	0.0002	SPAR	NA	NA	NA	REPS_DISAGREE	0.000334064	NA	0.000243994	NA
Scer_11.223	Spar_11.250	YKL026C	S000001509	GPX1	432	432	1451	2976	395.738	998.443	1.87178	1.57466	1627	3695	480.692	511.869	1.75692	2.8493	30	28	138.164	0	-2.16645	4.85798	189	142	145.113	7.08968	0.378912	4.14379	0	0	0	NA	NA	NA	NA	NA	NA	NA	NA	NA	NA	NA	NA	NA	NA	NA	NA
Scer_11.224	Spar_11.252	YKL025C	S000001508	PAN3	1668	1671	27746	31494	27176	34040.4	0.0325397	-0.109573	16538	23651	17628	18914.2	-0.0894845	0.325006	17525	17599	20066	17118.5	-0.192739	0.0425295	16785	19767	26523.7	23292.1	-0.657487	-0.234143	1	1	1	NA	NA	REPS_DISAGREE	NA	NA	REPS_DISAGREE	NA	NA	REPS_DISAGREE	0.9606	SPAR	NA	NA	NA	NA	0.999945
Scer_11.227	Spar_11.254	YKL023W	S000001506	NA	746	761	11680	12587	17908.4	17617.7	-0.58783	-0.456334	12113	15154	9829.51	15473.7	0.330059	-0.00139894	3668	3208	4862.97	3479.54	-0.378026	-0.0884652	5597	6665	6064.88	6722.68	-0.0870849	0.0162903	1	1	1	0.0002	SPAR	NA	0.003	SCER	NA	0.0002	SCER	NA	NA	NA	REPS_DISAGREE	0.000334064	0.0072398	0.000243994	NA
Scer_11.228	Spar_11.255	YKL022C	S000001505	CDC16	1972	1846	20674	23527	16801.5	12848.7	0.203955	0.777381	13847	18267	13365.8	18261.5	-0.044238	-0.094824	8424	5173	7546.58	4564.12	0.0634063	0.0853703	7114	8260	9632.96	8475.09	-0.532522	-0.132339	1	1	1	0.0002	SCER	NA	0.0238	SPAR	NA	0.0002	SPAR	NA	0.9376	SPAR	NA	0.000334064	0.0444605	0.000243994	0.991215
Scer_11.229	Spar_11.256	YKL021C	S000001504	MAK11	1132	970	48573	42054	67594.8	58667	-0.699566	-0.703113	24535	32377	38380	62568.2	-0.868311	-1.17326	22000	11278	29314	16021.8	-0.636885	-0.729304	15940	13083	24334.2	30107.4	-0.833121	-1.42518	1	1	1	0.0002	SPAR	NA	NA	NA	REPS_DISAGREE	0.0002	SPAR	NA	0.0002	SCER	NA	0.000334064	NA	0.000243994	0.000633882
Scer_11.23	Spar_11.26	YKL205W	S000001688	LOS1	2120	2123	52646	61387	54816.1	69712.4	-0.0562348	-0.181438	20787	24391	36129	43942.6	-0.795406	-0.847204	13927	11966	13580.4	9094.98	0.0383951	0.397801	11798	8930	14125.1	21529.3	-0.257655	-1.26743	1	1	1	0.03	SPAR	NA	0.106	SCER	NA	0.0002	SPAR	NA	NA	NA	REPS_DISAGREE	0.0391149	0.165691	0.000243994	NA
Scer_11.230	Spar_11.257	YKL020C	S000001503	SPT23	2708	2687	35560	38151	36545.7	43705.2	-0.0506777	-0.207311	14760	19331	22162.1	23265.1	-0.597599	-0.278471	8897	8370	11126.7	5887.59	-0.333839	0.496245	10137	11211	20902.7	16314.2	-1.05522	-0.552403	1	1	1	0.015	SPAR	NA	NA	NA	REPS_DISAGREE	0.0002	SPAR	NA	0.8674	SPAR	NA	0.0201804	NA	0.000243994	0.962443
Scer_11.231	Spar_11.258	YKL019W	S000001502	RAM2	789	789	18989	22671	16316.5	14694.8	0.218821	0.62551	17362	31356	10581.3	14134.8	0.714364	1.14943	5619	3954	5231.07	4849.38	0.103188	-0.294419	8781	7684	5221.94	4572.01	0.749686	0.748902	1	1	1	0.0002	SCER	NA	0.1472	SPAR	NA	0.0002	SCER	NA	0.1102	SPAR	NA	0.000334064	0.218262	0.000243994	0.193659
Scer_11.232	Spar_11.259	YKL018C-A	S000007615	NA	265	265	8152	8903	5687.12	6210	0.51938	0.519629	6374	8675	3471.38	6188.8	0.876502	0.487137	3670	1032	2163.22	1656.11	0.762323	-0.681826	5251	4818	1734.96	2173.2	1.59714	1.14825	1	0	0	0.0002	SCER	NA	NA	NA	LOW_COV	NA	NA	REPS_DISAGREE	NA	NA	LOW_COV	0.000334064	NA	NA	NA
Scer_11.233	Spar_11.260	YKL018W	S000001501	SWD2	696	696	17285	21172	12184.6	12447.8	0.504432	0.766221	10363	15674	11366.9	16257	-0.133379	-0.0526831	10512	6874	6713.56	6811.91	0.64681	0.0130888	6358	7471	9579.61	8860.85	-0.591318	-0.246113	1	1	1	0.0002	SCER	NA	NA	NA	REPS_DISAGREE	0.0002	SPAR	NA	0.5382	SPAR	NA	0.000334064	NA	0.000243994	0.702476
Scer_11.234	Spar_11.261	YKL017C	S000001500	HCS1	1634	1661	9281	9682	11534.9	8350.79	-0.28998	0.237012	8477	11234	6507.97	10026.1	0.40494	0.18774	2666	2071	2217.68	2019.99	0.289158	0.0596088	3533	2766	2740.08	2487.64	0.390202	0.176607	1	1	1	NA	NA	REPS_DISAGREE	NA	NA	REPS_DISAGREE	NA	NA	REPS_DISAGREE	0.2062	SPAR	NA	NA	NA	NA	0.329089
Scer_11.235	Spar_11.262	YKL016C	S000001499	ATP7	411	411	52607	47434	79348.9	67684.7	-0.592946	-0.512899	27511	37614	53407.1	89469.7	-0.956997	-1.25011	31226	22350	52303.6	25024	-0.744145	-0.163033	26914	25049	56679.5	54251.9	-1.07444	-1.11489	1	1	1	0.0002	SPAR	NA	NA	NA	REPS_DISAGREE	0.0002	SPAR	NA	0.0002	SCER	NA	0.000334064	NA	0.000243994	0.000633882
Scer_11.237	Spar_11.265	YKL014C	S000001497	URB1	4463	4466	84883	97266	96369.6	113313	-0.18213	-0.219339	25928	28318	36924.1	55737.9	-0.509065	-0.975944	25157	19952	31017.3	20912.5	-0.301133	-0.0668594	26930	17619	27898	38587	-0.0499776	-1.12997	1	1	1	0.0002	SPAR	NA	NA	NA	REPS_DISAGREE	0.0002	SPAR	NA	NA	NA	REPS_DISAGREE	0.000334064	NA	0.000243994	NA
Scer_11.238	Spar_11.266	YKL013C	S000001496	ARC19	235	235	17572	16754	19895	16399.9	-0.179117	0.0308192	16913	23455	17026.9	30457.9	-0.00968246	-0.376907	7437	5752	11681.4	7115.31	-0.651351	-0.306815	10105	10858	16538.6	14400.4	-0.710716	-0.407317	1	1	1	NA	NA	REPS_DISAGREE	0.0116	SPAR	NA	NA	NA	REPS_DISAGREE	NA	NA	REPS_DISAGREE	NA	0.0238142	NA	NA
Scer_11.239	Spar_11.267	YKL012W	S000001495	PRP40	1518	1518	19655	23551	23316.8	28131.1	-0.246461	-0.256367	16986	21926	14607	20650.8	0.217674	0.0864401	5434	4722	7285.38	6079.11	-0.422921	-0.364394	5130	5252	6564.24	8297.01	-0.355608	-0.659624	1	1	1	0.0002	SPAR	NA	0.2742	SPAR	NA	0.0002	SCER	NA	0.0784	SPAR	NA	0.000334064	0.368247	0.000243994	0.143778
Scer_11.24	Spar_11.27	YKL204W	S000001687	EAP1	1508	1514	39643	46428	41615.9	43172.2	-0.0643392	0.110618	21777	31519	25534.7	27931.2	-0.223916	0.180067	28986	18218	33704.9	24326.5	-0.211868	-0.411417	24072	29661	48348.3	40478.3	-1.00035	-0.44284	1	1	1	NA	NA	REPS_DISAGREE	0.0006	SPAR	NA	NA	NA	REPS_DISAGREE	0.4368	SPAR	NA	NA	0.00177375	NA	0.600189
Scer_11.240	Spar_11.268	YKL011C	S000001494	CCE1	969	969	7479	9389	8862.94	8543.34	-0.244909	0.136157	8643	14286	6266.32	9967.7	0.46385	0.519226	1019	678	1664.02	1069.46	-0.706969	-0.656752	2261	1099	1890.74	1711.11	0.257885	-0.638276	1	0	0	NA	NA	REPS_DISAGREE	NA	NA	LOW_COV	0.0002	SCER	NA	NA	NA	LOW_COV	NA	NA	0.000243994	NA
Scer_11.241	Spar_11.269	YKL010C	S000001493	UFD4	3502	3502	40858	52529	41416.6	42797.1	-0.0195891	0.295596	19700	23550	22439.2	25956.7	-0.187819	-0.140376	7269	5261	8653.91	5733.37	-0.251563	-0.124025	20010	14366	14212.6	18805.6	0.493525	-0.388479	1	1	1	NA	NA	REPS_DISAGREE	0.0002	SPAR	NA	0.0002	SPAR	NA	NA	NA	REPS_DISAGREE	NA	0.000685507	0.000243994	NA
Scer_11.242	Spar_11.270	YKL009W	S000001492	MRT4	404	404	54542	62791	70983.8	64621.9	-0.380117	-0.0414644	23779	44305	50812.2	79217.7	-1.09545	-0.838339	36935	21760	89623	71769	-1.27886	-1.72164	27334	20766	54831.5	55424.2	-1.00428	-1.41625	1	1	1	0.3826	SPAR	NA	0.0002	SPAR	NA	0.0002	SPAR	NA	0.0002	SCER	NA	0.42557	0.000685507	0.000243994	0.000633882
Scer_11.243	Spar_11.271	YKL008C	S000001491	LAC1	639	639	18017	18777	21551.3	23844.5	-0.258405	-0.344675	25104	39137	20358.8	22336.7	0.302249	0.809088	5926	6094	10707.2	8302.71	-0.853342	-0.446129	22509	16788	9415.29	14023	1.25734	0.259622	1	1	1	0.0002	SPAR	NA	0.4656	SPAR	NA	0.0002	SCER	NA	0.853	SCER	NA	0.000334064	0.56585	0.000243994	0.95352
Scer_11.244	Spar_11.272	YKL007W	S000001490	CAP1	662	662	37434	27192	35705.7	40627.5	0.0681949	-0.579257	39602	57270	27783.1	42749.6	0.511348	0.421859	22013	14999	16950.8	9843.9	0.376983	0.607514	24929	33145	19445.2	18479	0.358396	0.842867	1	1	1	NA	NA	REPS_DISAGREE	0.0002	SCER	NA	0.0002	SCER	NA	0.0002	SPAR	NA	NA	0.000685507	0.000243994	0.000633882
Scer_11.245	Spar_11.273	YKL006C-A	S000002101	SFT1	222	222	6123	7103	4941.27	3966.97	0.309302	0.840229	5694	10478	2596.6	4677.24	1.13251	1.16346	2366	2675	1966.57	2416.12	0.266647	0.146788	2368	3020	1604.78	2518.09	0.561002	0.262125	1	1	1	0.0006	SCER	NA	0.7826	SPAR	NA	0.0168	SCER	NA	0.095	SPAR	NA	0.000945863	0.844365	0.0183889	0.171305
Scer_11.247	Spar_11.275	YKL005C	S000001488	BYE1	1601	1601	24454	23358	21292.5	20726.1	0.199718	0.172458	16857	22116	12531.8	19121.2	0.427727	0.209906	7116	2382	8247.48	5450.13	-0.212859	-1.19378	4618	6296	5915.5	5481.99	-0.357163	0.199702	1	1	1	0.0006	SCER	NA	0.0002	SPAR	NA	0.3212	SCER	NA	NA	NA	REPS_DISAGREE	0.000945863	0.000685507	0.32674	NA
Scer_11.248	Spar_11.276	YKL004W	S000001487	AUR1	697	697	46569	47692	40744.1	36927.5	0.192774	0.369043	22542	32343	22849.8	25099.6	-0.0195632	0.365776	9529	10478	10252.4	7018.54	-0.10555	0.578052	20931	14753	11271.9	13645.1	0.892853	0.112614	1	1	1	0.0002	SCER	NA	NA	NA	REPS_DISAGREE	NA	NA	REPS_DISAGREE	NA	NA	REPS_DISAGREE	0.000334064	NA	NA	NA
Scer_11.249	Spar_11.277	YKL003C	S000001486	MRP17	188	188	6546	7351	7617.21	6465.07	-0.218617	0.185248	4790	8312	4423.23	8061.07	0.114899	0.0442182	1864	1483	4059.2	2859.63	-1.12237	-0.946842	2802	2015	2746.48	2879.66	0.0288616	-0.514904	1	1	1	NA	NA	REPS_DISAGREE	0.0002	SPAR	NA	NA	NA	REPS_DISAGREE	0.0002	SCER	NA	NA	0.000685507	NA	0.000633882
Scer_11.25	Spar_11.28	NA	NA	NA	5669	5669	38513	47994	32449.5	35678	0.247143	0.427811	17368	18287	16416.3	22716.3	0.0812988	-0.312896	6278	6538	9997.22	5817.04	-0.671137	0.168538	12615	10065	10819.5	13094.6	0.221491	-0.379596	1	1	1	0.0002	SCER	NA	0.0012	SPAR	NA	0.0002	SPAR	NA	NA	NA	REPS_DISAGREE	0.000334064	0.00329234	0.000243994	NA
Scer_11.250	Spar_11.278	YKL002W	S000001485	DID4	416	416	14164	14732	15224.5	14991.5	-0.104158	-0.0251927	16159	20924	8454.99	16397.8	0.934382	0.351634	4033	2506	4624.96	3997.64	-0.197543	-0.673546	6788	6982	3437.9	4369.33	0.98125	0.676106	1	1	1	0.7444	SPAR	NA	0.2884	SPAR	NA	0.0002	SCER	NA	0.9616	SCER	NA	0.776746	0.384046	0.000243994	1
Scer_11.251	Spar_11.279	YKL001C	S000001484	MET14	448	448	8731	5760	7976.25	7929.98	0.130421	-0.46118	8142	13385	5060.69	7230.58	0.68594	0.888343	2611	703	2864.13	1944.39	-0.133445	-1.46641	2517	3233	2287.67	2454.7	0.13777	0.397187	1	0	0	NA	NA	REPS_DISAGREE	NA	NA	LOW_COV	0.0002	SCER	NA	NA	NA	LOW_COV	NA	NA	0.000243994	NA
Scer_11.252	Spar_11.280	YKR001C	S000001709	VPS1	1245	1245	67319	65837	62078.2	71449.2	0.116924	-0.118018	49316	59166	31762.1	39933.5	0.634735	0.567157	53994	31937	43462.1	29740.4	0.313033	0.102803	69282	74253	44400.4	44135.8	0.641896	0.750488	1	1	1	NA	NA	REPS_DISAGREE	0.0012	SCER	NA	0.0002	SCER	NA	0.5568	SPAR	NA	NA	0.00329234	0.000243994	0.721163
Scer_11.253	Spar_11.281	YKR002W	S000001710	PAP1	1202	1202	33318	33059	29505.8	28022.9	0.175299	0.238429	19895	24009	17408.9	25693.9	0.192574	-0.0978478	9332	8693	10221.1	5524.72	-0.13128	0.653857	13987	11669	11707.2	12074.6	0.256667	-0.0492852	1	1	1	0.0002	SCER	NA	NA	NA	REPS_DISAGREE	NA	NA	REPS_DISAGREE	0.8274	SPAR	NA	0.000334064	NA	NA	0.938928
Scer_11.254	Spar_11.282	YKR003W	S000001711	OSH6	993	972	19619	19853	10091.8	10459.8	0.92816	0.893595	16582	21012	6182.31	8720.66	1.39242	1.23777	5704	4943	3436.95	2160.09	0.699839	1.16308	10454	9498	5234.75	5259.29	0.966888	0.821796	1	1	1	0.0002	SCER	NA	NA	NA	REPS_DISAGREE	0.0002	SCER	NA	0.0002	SPAR	NA	0.000334064	NA	0.000243994	0.000633882
Scer_11.257	Spar_11.286	YKR006C	S000001714	MRPL13	620	620	27659	22997	25195.3	22752.8	0.134589	0.0154018	15962	24793	15863.7	23631	0.00891072	0.0692501	18656	14891	15111.3	11383.1	0.303993	0.387519	13889	14875	19569	16997.7	-0.494594	-0.192439	1	1	1	0.7778	SCER	NA	0.0206	SCER	NA	NA	NA	REPS_DISAGREE	0.0002	SPAR	NA	0.807034	0.0394806	NA	0.000633882
Scer_11.258	Spar_11.287	YKR007W	S000001715	MEH1	439	433	14217	11728	10497.5	11476.1	0.417687	0.0114631	13098	21410	9399.05	16057.7	0.458863	0.39514	4915	2809	2940.77	2603.6	0.720944	0.0896518	8219	6443	7648.32	6875.74	0.0839524	-0.113622	1	1	1	0.8312	SCER	NA	0.6208	SCER	NA	NA	NA	REPS_DISAGREE	0.5706	SPAR	NA	0.85435	0.703616	NA	0.734096
Scer_11.259	Spar_11.288	YKR008W	S000001716	RSC4	1340	1340	30033	35240	35198.8	37265.9	-0.228972	-0.0806414	19342	26229	19600.1	27484.6	-0.0191243	-0.0674583	16134	9188	13974.7	10248.1	0.20727	-0.157518	17103	17840	11165.2	12856.9	0.615197	0.472539	1	1	1	0.0282	SPAR	NA	NA	NA	REPS_DISAGREE	0.3136	SCER	NA	0.0512	SCER	NA	0.0369328	NA	0.31922	0.0983128
Scer_11.26	Spar_11.29	NA	NA	NA	2744	2631	18928	25619	45526.7	55397.7	-1.32682	-1.17325	12417	13527	25884.6	27575.6	-1.12039	-1.08817	1234	792	11475.7	8520.43	-3.27679	-3.48637	2560	1325	13521.1	17088.2	-2.46121	-3.7486	1	1	1	0.0002	SPAR	NA	0.0002	SPAR	NA	0.1064	SCER	NA	0.0002	SCER	NA	0.000334064	0.000685507	0.111072	0.000633882
Scer_11.260	Spar_11.289	YKR009C	S000001717	FOX2	2097	2097	4045	4961	4033.75	3200.77	0.00401818	0.63205	3637	6571	3191.62	4557.01	0.188403	0.52793	662	1911	678.718	687.44	-0.0359272	1.47368	1250	1904	591.123	648.914	1.07911	1.55147	1	0	0	0.9788	SCER	NA	NA	NA	LOW_COV	NA	NA	REPS_DISAGREE	NA	NA	LOW_COV	0.983006	NA	NA	NA
Scer_11.265	Spar_11.292	YKR010C	S000001718	TOF2	2170	2170	24546	28211	25770.6	34114.8	-0.0702328	-0.274131	16891	21961	19046.7	22460.4	-0.173274	-0.0324377	3959	2520	5294.6	3142.87	-0.419295	-0.318547	6315	4833	6348.71	6410.74	-0.00767857	-0.407498	1	1	1	0.0044	SPAR	NA	0.6924	SPAR	NA	NA	NA	REPS_DISAGREE	0.002	SCER	NA	0.00630937	0.76807	NA	0.00523107
Scer_11.266	Spar_11.293	YKR011C	S000001719	NA	904	904	8419	12628	8979.97	11648.8	-0.0930513	0.116431	12220	17672	12453.8	16136.7	-0.0273425	0.131108	3981	4296	2327.61	3402.93	0.774025	0.336128	7934	7929	7588.57	8532.64	0.0642119	-0.10584	1	1	1	NA	NA	REPS_DISAGREE	0.0564	SCER	NA	NA	NA	REPS_DISAGREE	0.006	SPAR	NA	NA	0.0958233	NA	0.0142289
Scer_11.269	Spar_11.297	YKR014C	S000001722	YPT52	446	446	23783	29854	24777.7	23920.9	-0.0591114	0.319638	27347	31351	18075.8	29627.4	0.597299	0.0815763	10311	4152	11325.4	5569.07	-0.135367	-0.423542	20848	14800	13839.1	14256.1	0.591123	0.0540148	1	1	1	NA	NA	REPS_DISAGREE	0.2888	SPAR	NA	NA	NA	REPS_DISAGREE	NA	NA	REPS_DISAGREE	NA	0.384146	NA	NA
Scer_11.27	Spar_11.30	YKL198C	S000001681	PTK1	1759	1741	28958	26889	33890.6	35041.8	-0.241756	-0.396886	12673	19955	22349.2	23820.8	-0.833252	-0.270299	4398	5703	7079.64	4877.6	-0.701544	0.210667	8320	10341	9671.37	6938.29	-0.231952	0.560815	1	1	1	0.0002	SPAR	NA	NA	NA	REPS_DISAGREE	NA	NA	REPS_DISAGREE	0.2748	SCER	NA	0.000334064	NA	NA	0.418255
Scer_11.270	Spar_11.298	YKR015C	S000001723	NA	1549	1540	692	1071	2326.82	4119.82	-1.75646	-1.95103	137	367	1694.12	2461.44	-3.62705	-2.75072	29	84	330.787	384.039	-3.47563	-2.18788	0	0	650.876	283.17	-9.35686	-8.15902	1	0	0	0.0002	SPAR	NA	NA	NA	LOW_COV	NA	NA	LOW_COV	NA	NA	LOW_COV	0.000334064	NA	NA	NA
Scer_11.271	Spar_11.299	YKR016W	S000001724	FCJ1	1254	1254	30479	34237	33024.8	31883.7	-0.115729	0.102735	16917	23429	25629.1	34460.1	-0.599281	-0.556612	12753	8826	12221	9886.24	0.0614746	-0.163644	11635	9019	20597.5	25073.7	-0.823948	-1.47503	1	1	1	NA	NA	REPS_DISAGREE	NA	NA	REPS_DISAGREE	0.0002	SPAR	NA	0.0048	SPAR	NA	NA	NA	0.000243994	0.0115975
Scer_11.273	Spar_11.300	YKR017C	S000001725	HEL1	1227	1227	8804	14936	9148.58	12247.3	-0.0553827	0.286309	7395	9081	6064.52	9463.56	0.286115	-0.0595254	1027	687	1419.96	526.164	-0.467028	0.384157	1209	1011	1188.65	1514.27	0.0244717	-0.582367	1	0	0	NA	NA	REPS_DISAGREE	NA	NA	LOW_COV	NA	NA	REPS_DISAGREE	NA	NA	LOW_COV	NA	NA	NA	NA
Scer_11.274	Spar_11.301	NA	NA	NA	1587	1614	53559	53704	37754.8	41704.3	0.528798	0.389163	35661	47561	18291.4	28584.8	0.98748	0.75885	22407	11543	20044.9	14587.4	0.185047	-0.313344	31393	26059	23813.5	29680.7	0.422986	-0.1634	1	1	1	0.0002	SCER	NA	0.0002	SPAR	NA	0.0002	SCER	NA	0.0002	SPAR	NA	0.000334064	0.000685507	0.000243994	0.000633882
Scer_11.275	Spar_11.302	YKR019C	S000001727	IRS4	1531	1531	7575	7657	8917.49	10612.7	-0.235363	-0.470885	7672	10975	5509.34	8160.7	0.47765	0.427411	2595	1579	2010.94	2349.59	0.367702	-0.573101	2307	2660	2684.6	2559.37	-0.218599	0.0556139	1	1	1	0.0002	SPAR	NA	NA	NA	REPS_DISAGREE	0.0002	SCER	NA	0.4206	SPAR	NA	0.000334064	NA	0.000243994	0.58407
Scer_11.276	Spar_11.303	YKR020W	S000001728	VPS51	414	414	4777	6584	5728.77	6688.38	-0.262071	-0.0226883	6167	8232	3737.27	6180.21	0.722431	0.413528	1893	614	1280.79	2067.36	0.563276	-1.74983	2501	3735	1924.88	2673.23	0.37756	0.482373	1	0	0	0.7388	SPAR	NA	NA	NA	LOW_COV	0.0002	SCER	NA	NA	NA	LOW_COV	0.771132	NA	0.000243994	NA
Scer_11.277	Spar_11.304	YKR021W	S000001729	ALY1	2269	2266	19308	22585	22202	23489.2	-0.203388	-0.0585397	10683	13709	13449	17251.5	-0.334062	-0.333487	3265	1738	3661.85	3593.44	-0.16735	-1.04942	5508	3621	7443.46	6343.18	-0.436285	-0.810555	1	1	1	0.1644	SPAR	NA	NA	NA	REPS_DISAGREE	0.0002	SPAR	NA	0.0002	SCER	NA	0.193874	NA	0.000243994	0.000633882
Scer_11.278	Spar_11.305	YKR022C	S000001730	NTR2	871	871	12097	12322	10993.4	11095	0.138003	0.151311	9992	14496	8426.4	16425.3	0.245829	-0.180255	1962	772	1632.76	1447.46	0.264868	-0.905975	1417	1852	2264.19	1693.18	-0.675777	0.129274	1	0	0	0.0284	SCER	NA	NA	NA	LOW_COV	NA	NA	REPS_DISAGREE	NA	NA	LOW_COV	0.0371393	NA	NA	NA
Scer_11.279	Spar_11.306	YKR023W	S000001731	NA	1452	1452	16895	21203	30996.5	28309.7	-0.875469	-0.417012	12274	15526	18198.7	30765.4	-0.568195	-0.986575	5575	4699	12531.6	9634.24	-1.16838	-1.03566	5765	7001	13241.6	13600.9	-1.19954	-0.957972	1	1	1	0.0002	SPAR	NA	0.0002	SPAR	NA	NA	NA	REPS_DISAGREE	0.0002	SCER	NA	0.000334064	0.000685507	NA	0.000633882
Scer_11.28	Spar_11.31	YKL197C	S000001680	PEX1	2799	2799	15109	17780	11277	11061.3	0.421988	0.684688	6823	8598	5864.45	6315.91	0.218377	0.44495	4732	3321	4303.25	2429.22	0.136992	0.450962	6758	4846	1860.86	2955.14	1.86006	0.713375	1	1	1	0.0002	SCER	NA	0.042	SPAR	NA	NA	NA	REPS_DISAGREE	0.0002	SCER	NA	0.000334064	0.0740164	NA	0.000633882
Scer_11.280	Spar_11.307	YKR024C	S000001732	DBP7	1845	1842	39465	41291	43856.5	31307	-0.15456	0.396981	12187	14601	28884	43527.7	-1.24721	-1.57815	27604	19067	30298.2	22249.1	-0.1367	-0.225005	13065	12946	26308.2	28690.7	-1.0121	-1.15036	1	1	1	NA	NA	REPS_DISAGREE	NA	NA	REPS_DISAGREE	0.0002	SPAR	NA	0.0002	SCER	NA	NA	NA	0.000243994	0.000633882
Scer_11.281	Spar_11.308	YKR025W	S000001733	RPC37	770	770	37767	35347	43077.9	38244.5	-0.189816	-0.113663	26222	36630	31523	54412.7	-0.265619	-0.570904	20409	12095	20239.5	16730.4	0.0120307	-0.468028	15252	19313	29487.9	26221	-0.951078	-0.441129	1	1	1	0.0286	SPAR	NA	NA	NA	REPS_DISAGREE	0.0002	SPAR	NA	NA	NA	REPS_DISAGREE	0.0373869	NA	0.000243994	NA
Scer_11.282	Spar_11.309	YKR026C	S000001734	GCN3	578	578	38982	34978	33588.1	28333.5	0.214852	0.303927	24656	30431	24959.6	42293.6	-0.0176564	-0.474884	16268	10726	14444.7	8292.63	0.171486	0.371172	17630	17124	17085	19236	0.0453035	-0.167777	1	1	1	0.0002	SCER	NA	NA	NA	REPS_DISAGREE	0.0002	SPAR	NA	NA	NA	REPS_DISAGREE	0.000334064	NA	0.000243994	NA
Scer_11.286	Spar_11.314	YKR027W	S000001735	BCH2	2095	2095	20194	23908	16736	19387.3	0.270954	0.30237	17351	21574	12314.4	13839.4	0.494641	0.64048	2865	2581	3576.13	2164.13	-0.319763	0.254038	5057	3373	3196.76	3767.12	0.661505	-0.159386	1	1	1	0.0002	SCER	NA	0.7486	SPAR	NA	0.0002	SCER	NA	NA	NA	REPS_DISAGREE	0.000334064	0.814744	0.000243994	NA
Scer_11.287	Spar_11.315	NA	NA	NA	2309	2300	62880	67443	50456.1	57863	0.311934	0.215389	35309	35017	20844.7	28997	0.754691	0.266508	10916	7462	13528	10042.5	-0.31511	-0.434065	15094	13700	10951.8	12794.4	0.457139	0.0930253	1	1	1	0.0002	SCER	NA	0.0002	SPAR	NA	NA	NA	REPS_DISAGREE	NA	NA	REPS_DISAGREE	0.000334064	0.000685507	NA	NA
Scer_11.289	Spar_11.317	YKR029C	S000001737	SET3	2120	2108	17995	22555	24718.2	30031.7	-0.466147	-0.421212	15261	19207	17886.9	22442.4	-0.237233	-0.23277	7322	4337	10796	5921.87	-0.568307	-0.457455	8474	8347	8749.48	9020.99	-0.0543377	-0.120205	1	1	1	0.0002	SPAR	NA	0.722	SPAR	NA	0.0002	SCER	NA	0.0002	SCER	NA	0.000334064	0.791623	0.000243994	0.000633882
Scer_11.290	Spar_11.318	YKR030W	S000001738	GMH1	632	632	16151	11889	15163	12705.8	0.0910625	-0.0958556	12034	15308	9225.83	12359.6	0.38333	0.308635	4434	4128	4634.04	3234.6	-0.0636475	0.35176	4447	4135	4058.9	4718.39	0.131711	-0.190364	1	1	1	NA	NA	REPS_DISAGREE	NA	NA	REPS_DISAGREE	0.0002	SCER	NA	0.0144	SPAR	NA	NA	NA	0.000243994	0.031746
Scer_11.291	Spar_11.319	YKR031C	S000001739	SPO14	3899	3899	24325	34989	27344.6	32293.6	-0.168808	0.115651	11910	13476	12076.2	15107.9	-0.0199916	-0.164895	4452	4206	5223	3287.01	-0.230378	0.355576	7458	6086	7029.46	7869.96	0.0853636	-0.370808	1	1	1	NA	NA	REPS_DISAGREE	NA	NA	REPS_DISAGREE	NA	NA	REPS_DISAGREE	NA	NA	REPS_DISAGREE	NA	NA	NA	NA
Scer_11.293	Spar_11.321	YKR034W	S000001742	DAL80	512	512	28	0	169.602	54.5868	-2.55651	-5.79667	108	106	22.5189	187.227	2.21243	-0.814864	0	0	0	0	0	0	30	4	0	0	4.9542	2.32193	0	0	0	NA	NA	NA	NA	NA	NA	NA	NA	NA	NA	NA	NA	NA	NA	NA	NA
Scer_11.294	Spar_11.322	YKR035W-A	S000006435	DID2	461	461	23638	23196	16205.4	14902.2	0.544605	0.638315	15814	23920	13433.4	24472.7	0.235362	-0.0329516	11444	5636	7966.11	5699.1	0.522589	-0.0160602	10463	15436	11489.6	11560.8	-0.135014	0.417031	1	1	1	0.0002	SCER	NA	0.79	SPAR	NA	0.0002	SPAR	NA	NA	NA	REPS_DISAGREE	0.000334064	0.848864	0.000243994	NA
Scer_11.295	Spar_11.323	YKR036C	S000001744	CAF4	1813	1819	15672	14040	19783.9	18164.5	-0.331352	-0.36679	13343	17368	13499.2	20133.8	-0.0120255	-0.208409	2042	2313	1575.27	709.616	0.37894	1.70801	4608	2952	2927.87	3710.82	0.658874	-0.325179	1	1	1	0.0002	SPAR	NA	0.0002	SCER	NA	0.0002	SCER	NA	0.7988	SPAR	NA	0.000334064	0.000685507	0.000243994	0.917131
Scer_11.296	Spar_11.324	YKR037C	S000001745	SPC34	815	839	12824	11780	10545.1	10026.1	0.324124	0.274426	8880	12387	7754.3	12177.5	0.23741	0.0664782	4597	3325	3865.57	3558.16	0.291825	-0.0558774	5131	5791	5766.12	5297.24	-0.126459	0.170419	1	1	1	0.0002	SCER	NA	0.6978	SPAR	NA	0.0792	SPAR	NA	0.5288	SPAR	NA	0.000334064	0.772611	0.0831302	0.694582
Scer_11.297	Spar_11.325	YKR038C	S000001746	KAE1	973	1039	38953	35636	40458.5	36534.5	0.039978	0.0587619	27827	47079	19531.7	32316.4	0.60533	0.637485	12815	5591	17924	11720.8	-0.389343	-0.973069	13419	16585	16442.6	13952.5	-0.198459	0.344024	1	1	1	0.2268	SCER	NA	0.0002	SPAR	NA	0.0002	SCER	NA	NA	NA	REPS_DISAGREE	0.261997	0.000685507	0.000243994	NA
Scer_11.30	Spar_11.47	YKL196C	S000001679	YKT6	419	285	40322	41706	29510.7	31660.4	-0.105673	-0.158422	37098	55161	19588.9	36197.5	0.365285	0.0517551	19018	13816	12197.8	9438.7	0.0847185	-0.00635636	24061	25462	17114.8	17459	-0.064563	-0.0116361	1	1	1	0.0086	SPAR	NA	0.2042	SCER	NA	0.0002	SCER	NA	0.3248	SPAR	NA	0.0119318	0.288146	0.000243994	0.474775
Scer_11.302	Spar_11.330	YKR039W	S000001747	GAP1	1385	1385	2842	2072	1129.69	1843.05	1.33021	0.168842	3227	4744	379.357	601.188	3.08521	2.97812	895	788	354.991	0	1.33166	9.62388	4082	4229	217.67	263.986	4.2228	3.99667	1	0	0	0.2516	SCER	NA	NA	NA	LOW_COV	0.0002	SCER	NA	NA	NA	LOW_COV	0.288743	NA	0.000243994	NA
Scer_11.307	Spar_11.332	YKR041W	S000001749	NA	693	699	1479	1286	2359.55	1878.78	-0.661088	-0.534114	929	1296	1593.65	2555.05	-0.765497	-0.9663	434	1035	382.22	282.234	0.19528	1.8834	745	557	608.195	443.313	0.304708	0.341124	1	0	0	0.0004	SPAR	NA	NA	NA	LOW_COV	NA	NA	LOW_COV	NA	NA	LOW_COV	0.000643008	NA	NA	NA
Scer_11.308	Spar_11.333	YKR042W	S000001750	UTH1	739	724	125900	106306	164228	150215	-0.413005	-0.528387	90421	177042	94179.3	92086.6	-0.0883361	0.913437	113803	78306	123651	97828.2	-0.149315	-0.350709	371393	431534	127642	96252.8	1.51125	2.13498	1	1	1	0.0002	SPAR	NA	0.0204	SCER	NA	0.0002	SCER	NA	0.9962	SCER	NA	0.000334064	0.039129	0.000243994	1
Scer_11.309	Spar_11.334	YKR043C	S000001751	SHB17	541	541	66511	60237	59994.4	49003.1	0.148762	0.297771	47876	67395	50419	80997.2	-0.0746629	-0.265227	42423	32733	35118.9	27266.8	0.272594	0.263592	56086	58582	60932.6	57567.8	-0.119572	0.0251956	1	1	1	0.0004	SCER	NA	NA	NA	REPS_DISAGREE	0.0002	SPAR	NA	0.8008	SPAR	NA	0.000643008	NA	0.000243994	0.918805
Scer_11.31	Spar_11.48	YKL195W	S000001678	MIA40	915	888	46020	53085	52852.3	59507.6	-0.242913	-0.207979	32778	51609	37563.3	61549.6	-0.239802	-0.297335	16870	8269	17910.9	9890.27	-0.129584	-0.301481	16332	17557	23309.9	21931.3	-0.556426	-0.36414	1	1	1	0.0002	SPAR	NA	NA	NA	REPS_DISAGREE	NA	NA	REPS_DISAGREE	NA	NA	REPS_DISAGREE	0.000334064	NA	NA	NA
Scer_11.310	Spar_11.335	YKR044W	S000001752	UIP5	1155	1155	8905	12107	7296.85	7640.17	0.287307	0.664095	7207	10230	6289.71	8777.35	0.196377	0.220926	1778	821	437.687	176.396	2.0198	2.21217	2804	1730	1410.59	1108.49	0.990683	0.641706	1	0	0	0.0002	SCER	NA	NA	NA	LOW_COV	0.0242	SPAR	NA	NA	NA	LOW_COV	0.000334064	NA	0.0261804	NA
Scer_11.311	Spar_11.336	YKR045C	S000001753	NA	496	514	5486	4313	7209.57	10325.8	-0.342667	-1.20787	5010	6046	9016.23	12392.2	-0.796157	-0.98383	3304	1829	4815.57	2939.26	-0.491927	-0.632672	4285	5296	10971	7067.99	-1.30469	-0.364901	1	1	1	0.0002	SPAR	NA	NA	NA	REPS_DISAGREE	NA	NA	REPS_DISAGREE	0.0828	SCER	NA	0.000334064	NA	NA	0.150922
Scer_11.312	Spar_11.337	YKR046C	S000001754	PET10	565	565	13563	11334	28844.2	30476.3	-1.08855	-1.42695	4956	9077	58341.3	65307.1	-3.557	-2.84681	11309	8205	24379.4	15833.3	-1.10812	-0.948302	6741	8175	98751.7	96569.3	-3.87257	-3.56211	1	1	1	0.0002	SPAR	NA	NA	NA	REPS_DISAGREE	0.0002	SPAR	NA	0.0002	SCER	NA	0.000334064	NA	0.000243994	0.000633882
Scer_11.313	Spar_11.338	YKR048C	S000001756	NAP1	843	843	90476	74882	145010	133026	-0.680535	-0.82901	61591	79883	108077	163929	-0.811257	-1.0371	59543	45730	76211	64721.2	-0.356063	-0.501088	79220	91946	156876	126008	-0.985679	-0.454655	1	1	1	0.0002	SPAR	NA	0.0004	SCER	NA	NA	NA	REPS_DISAGREE	0.0002	SCER	NA	0.000334064	0.00125798	NA	0.000633882
Scer_11.314	Spar_11.339	YKR049C	S000001757	FMP46	262	262	3134	2419	1945.96	4099.97	0.687244	-0.760957	3972	8314	1637.82	2897.73	1.27757	1.5203	995	770	1434.08	7.05584	-0.526915	6.58055	1668	2079	2272.73	1408.34	-0.446077	0.56156	1	0	0	NA	NA	REPS_DISAGREE	NA	NA	LOW_COV	0.0002	SCER	NA	NA	NA	LOW_COV	NA	NA	0.000243994	NA
Scer_11.315	Spar_11.340	NA	NA	NA	2262	2259	15022	16448	6603.56	7472.44	1.18372	1.13624	6118	7965	2643.37	3067.78	1.20845	1.37428	222	170	286.413	87.694	-0.367996	0.945173	538	384	381.989	187.668	0.491066	1.02709	1	0	0	0.0002	SCER	NA	NA	NA	LOW_COV	0.159	SCER	NA	NA	NA	LOW_COV	0.000334064	NA	0.164581	NA
Scer_11.316	Spar_11.341	YKR051W	S000001759	NA	985	988	9607	9768	6821.76	5557.93	0.498267	0.81779	7678	10153	6571.19	8242.29	0.228931	0.305143	897	790	950.003	1060.39	-0.0783476	-0.41982	1235	1123	1105.42	1779.93	0.164165	-0.659599	1	0	0	0.0002	SCER	NA	NA	NA	LOW_COV	0.0002	SPAR	NA	NA	NA	LOW_COV	0.000334064	NA	0.000243994	NA
Scer_11.317	Spar_11.342	YKR052C	S000001760	MRS4	550	550	16244	18436	14507.4	16806.8	0.163107	0.133474	13307	18256	11680.4	15177.4	0.188082	0.266428	3527	1895	3480.32	2138.93	0.0192161	-0.174603	4651	4338	4720.45	4682.94	-0.0213787	-0.11036	1	1	1	0.0292	SCER	NA	0.1126	SPAR	NA	0.1312	SCER	NA	0.7892	SPAR	NA	0.0381428	0.174475	0.136404	0.912402
Scer_11.318	Spar_11.343	YKR053C	S000001761	YSR3	869	869	1299	1090	1524.43	1541.33	-0.230707	-0.499464	1548	2698	860.049	894.911	0.847169	1.591	18	18	151.274	0	-3.0026	4.24793	388	501	83.2267	261.067	2.20742	0.937752	0	0	0	NA	NA	NA	NA	NA	NA	NA	NA	NA	NA	NA	NA	NA	NA	NA	NA
Scer_11.319	Spar_11.344	YKR054C	S000001762	DYN1	10566	10566	25910	33437	20154.8	20397.6	0.362366	0.713018	11211	12658	10797.8	14106.4	0.05417	-0.156294	3682	3174	4227.62	5188.06	-0.199304	-0.708716	6844	5180	7676.07	10257.9	-0.165504	-0.985578	1	1	1	0.0002	SCER	NA	0.0002	SPAR	NA	0.0002	SPAR	NA	NA	NA	REPS_DISAGREE	0.000334064	0.000685507	0.000243994	NA
Scer_11.32	Spar_11.49	YKL194C	S000001677	MST1	1094	1094	12584	12246	15326.7	18264.8	-0.284431	-0.576713	7218	9866	10729.4	13154.9	-0.571833	-0.415022	5234	1409	3743.54	2179.25	0.483402	-0.628796	3830	3210	5887.76	6167.19	-0.620242	-0.941824	1	1	1	0.0002	SPAR	NA	NA	NA	REPS_DISAGREE	NA	NA	REPS_DISAGREE	0.938	SPAR	NA	0.000334064	NA	NA	0.991215
Scer_11.320	Spar_11.345	YKR055W	S000001763	RHO4	679	679	7749	9638	5689.1	5082.53	0.445742	0.923053	6138	7305	3441.93	5272.42	0.834367	0.470343	3667	3829	3483.35	2770.93	0.0741059	0.466454	4247	5029	3096.46	2918.86	0.455698	0.784658	1	1	1	0.0002	SCER	NA	0.0016	SPAR	NA	NA	NA	REPS_DISAGREE	0.0776	SPAR	NA	0.000334064	0.00418584	NA	0.142602
Scer_11.321	Spar_11.346	YKR056W	S000001764	TRM2	1514	1400	50325	44333	49999.8	43702.2	-0.103586	-0.0922645	19159	25052	31817.5	45585.5	-0.844706	-0.976562	31126	20122	37191.3	24309.4	-0.369777	-0.385666	15313	17197	32703.8	34638.5	-1.20759	-1.12312	1	1	1	0.0408	SPAR	NA	0.0016	SPAR	NA	0.0002	SPAR	NA	0.1142	SCER	NA	0.052111	0.00418584	0.000243994	0.199906
Scer_11.323	Spar_11.348	YKR058W	S000001766	GLG1	1692	1668	10720	18533	4694.3	7066.51	1.17054	1.37029	13301	18470	4112.3	4322.54	1.67266	2.07437	198	443	673.675	612.85	-1.78204	-0.487937	1145	520	576.185	921.241	0.968891	-0.844471	1	0	0	0.0002	SCER	NA	NA	NA	LOW_COV	0.0002	SCER	NA	NA	NA	LOW_COV	0.000334064	NA	0.000243994	NA
Scer_11.325	Spar_11.350	YKR060W	S000001768	UTP30	778	778	24931	25365	31615.4	31795.3	-0.342673	-0.325965	12452	16623	19924	31814	-0.678089	-0.93644	16246	10084	17644.6	10148.3	-0.119139	-0.00917095	9205	7842	12763.6	13263.5	-0.471498	-0.758097	1	1	1	0.0002	SPAR	NA	0.0106	SCER	NA	0.0002	SPAR	NA	0.0002	SCER	NA	0.000334064	0.0220872	0.000243994	0.000633882
Scer_11.326	Spar_11.351	YKR061W	S000001769	KTR2	842	842	8317	6982	7112.37	7773.17	0.225704	-0.154841	6128	8378	10663.6	15621.4	-0.799102	-0.89877	550	502	127.071	60.4786	2.10511	3.0324	602	350	1777.64	1479.24	-1.56054	-2.07629	1	0	0	NA	NA	REPS_DISAGREE	NA	NA	LOW_COV	0.0002	SPAR	NA	NA	NA	LOW_COV	NA	NA	0.000243994	NA
Scer_11.327	Spar_11.352	YKR062W	S000001770	TFA2	786	786	20222	19719	23857.3	22048.1	-0.238496	-0.161062	14572	19357	21645.9	29933.2	-0.570861	-0.628863	10034	8143	11667.3	8528.49	-0.217553	-0.0667225	10376	14389	13395.2	14121	-0.368438	0.0271251	1	1	1	0.004	SPAR	NA	0.7716	SCER	NA	0.0002	SPAR	NA	0.0002	SCER	NA	0.00576408	0.834401	0.000243994	0.000633882
Scer_11.328	Spar_11.353	YKR063C	S000001771	LAS1	1335	1332	19890	17662	24228.3	21470.5	-0.287881	-0.284938	12285	14328	13746.9	22655.3	-0.165445	-0.664223	3853	4135	5027.35	2390.92	-0.386975	0.78682	4186	3556	4494.24	5653.39	-0.105728	-0.671957	1	1	1	0.0002	SPAR	NA	NA	NA	REPS_DISAGREE	NA	NA	REPS_DISAGREE	0.9036	SPAR	NA	0.000334064	NA	NA	0.978023
Scer_11.329	Spar_11.354	YKR064W	S000001772	OAF3	2018	2024	20092	27984	21979.8	32204.2	-0.125268	-0.198359	12831	15471	12446.9	17379.5	0.0481271	-0.163526	2376	2248	2476.87	2717.51	-0.0556734	-0.269247	3806	2184	3484.85	3239.98	0.131426	-0.564515	1	1	1	0.0002	SPAR	NA	NA	NA	REPS_DISAGREE	NA	NA	REPS_DISAGREE	NA	NA	REPS_DISAGREE	0.000334064	NA	NA	NA
Scer_11.33	Spar_11.50	YKL193C	S000001676	SDS22	878	878	12205	15562	13614.8	17906.5	-0.157687	-0.202441	13493	20992	9671.87	13017.4	0.480302	0.689352	5626	3756	6472.53	4567.14	-0.202186	-0.282027	11244	9802	9041.84	9405.08	0.314436	0.0596291	1	1	1	0.0014	SPAR	NA	0.5602	SPAR	NA	0.0002	SCER	NA	0.6762	SPAR	NA	0.00212301	0.650085	0.000243994	0.829546
Scer_11.330	Spar_11.355	YKR065C	S000001773	PAM17	474	474	25194	22193	27226.6	23776	-0.11193	-0.0993995	18842	34612	23269.8	32057.9	-0.304494	0.110588	16668	16977	23936.7	27202.3	-0.522114	-0.680114	23836	27818	37603.5	28661.1	-0.657704	-0.0430722	1	1	1	0.0812	SPAR	NA	0.0002	SPAR	NA	NA	NA	REPS_DISAGREE	0.7532	SCER	NA	0.0996106	0.000685507	NA	0.885927
Scer_11.331	Spar_11.356	YKR066C	S000001774	CCP1	904	931	35724	32657	46742.7	41872.1	-0.345378	-0.316128	36312	51391	33550.6	49294.8	0.156564	0.102536	17678	14609	21782.5	15785.9	-0.258741	-0.0693159	43894	45023	43854.1	36174.9	0.0437709	0.358125	1	1	1	0.0002	SPAR	NA	0.2278	SCER	NA	0.0002	SCER	NA	0.4868	SCER	NA	0.000334064	0.315981	0.000243994	0.649871
Scer_11.332	Spar_11.357	YKR067W	S000001775	GPT2	1894	1894	25184	26671	29469.1	31994.8	-0.226685	-0.262558	22028	26755	16786.1	18821.5	0.392049	0.507406	7776	4241	5444.87	4681.05	0.514051	-0.142394	16723	13772	14699.1	12826.9	0.186092	0.102558	1	1	1	0.0002	SPAR	NA	0.2202	SCER	NA	0.0002	SCER	NA	0.0164	SPAR	NA	0.000334064	0.306698	0.000243994	0.0358326
Scer_11.333	Spar_11.358	YKR068C	S000001776	BET3	472	472	21471	20765	21261.7	22575.1	0.0141302	-0.120575	17504	23011	12750	20749.6	0.457153	0.149235	9950	6815	7847.11	5647.7	0.342497	0.271008	8217	9335	6122.5	5472.81	0.424431	0.770258	1	1	1	NA	NA	REPS_DISAGREE	0.0092	SCER	NA	0.0002	SCER	NA	NA	NA	REPS_DISAGREE	NA	0.0194615	0.000243994	NA
Scer_11.334	Spar_11.359	YKR069W	S000001777	MET1	1413	1404	11518	13529	10263.4	7404.95	0.157149	0.860186	10543	15310	6526.15	9233.39	0.682678	0.720261	600	168	974.207	738.847	-0.707562	-2.13942	1137	719	1602.65	952.102	-0.504076	-0.413852	1	0	0	0.001	SCER	NA	NA	NA	LOW_COV	NA	NA	REPS_DISAGREE	NA	NA	LOW_COV	0.00154654	NA	NA	NA
Scer_11.335	Spar_11.360	YKR070W	S000001778	NA	803	803	20385	18378	22700.9	20983.2	-0.155232	-0.191244	17063	25789	12686.8	19936.3	0.427513	0.371345	7612	5745	12325.8	5151.77	-0.695266	0.15721	11322	12233	10606.1	10591.1	0.0942296	0.207901	1	1	1	0.0004	SPAR	NA	NA	NA	REPS_DISAGREE	0.0002	SCER	NA	NA	NA	REPS_DISAGREE	0.000643008	NA	0.000243994	NA
Scer_11.336	Spar_11.361	YKR071C	S000001779	DRE2	968	968	56768	61629	43931.8	44828.7	0.369804	0.459178	26377	31585	34209.7	52479.4	-0.375112	-0.732494	37964	26206	29750.6	18178.9	0.351701	0.527611	20678	23001	35371.4	35166.1	-0.774456	-0.612465	1	1	1	0.0002	SCER	NA	NA	NA	REPS_DISAGREE	0.0002	SPAR	NA	0.9674	SPAR	NA	0.000334064	NA	0.000243994	1
Scer_11.337	Spar_11.362	YKR072C	S000001780	SIS2	1346	1338	56989	60597	55827.8	57765.8	0.0210997	0.0604299	33782	45662	42718.4	49493.2	-0.347194	-0.124835	27531	23630	26133.2	12947.5	0.0665724	0.859299	18984	25635	22607.8	21997.2	-0.260624	0.212186	1	1	1	0.4466	SCER	NA	0.4288	SCER	NA	0.0002	SPAR	NA	0.1712	SPAR	NA	0.491919	0.529562	0.000243994	0.282087
Scer_11.34	Spar_11.51	YKL192C	S000001675	ACP1	241	241	41921	35867	39079.8	34665.6	0.101246	0.0491501	25252	42605	22189.8	32788.8	0.186494	0.37781	59122	48368	51992	35573.5	0.185402	0.443238	53766	57431	49707.7	45634.6	0.113223	0.331695	1	1	1	0.4934	SCER	NA	0.4818	SCER	NA	0.0026	SCER	NA	0.0018	SPAR	NA	0.537224	0.581356	0.00298771	0.00474481
Scer_11.340	Spar_11.365	YKR074W	S000001782	AIM29	404	404	19672	22963	17175.4	16048.5	0.195788	0.516843	15308	30951	7173.14	13748.3	1.0935	1.17067	11678	6937	9755.18	8003.34	0.259528	-0.206262	9340	11389	5283.83	5559.56	0.82172	1.03447	1	1	1	0.002	SCER	NA	NA	NA	REPS_DISAGREE	0.0002	SCER	NA	0.002	SPAR	NA	0.00298892	NA	0.000243994	0.00523107
Scer_11.341	Spar_11.366	YKR075C	S000001783	NA	892	886	80708	133040	116316	176540	-0.536999	-0.417868	80332	127475	128419	146184	-0.686546	-0.207307	7384	8156	8789.04	10235	-0.261009	-0.337278	4723	2907	14044	9819.62	-1.58171	-1.76552	1	1	1	0.0002	SPAR	NA	0.6466	SCER	NA	NA	NA	REPS_DISAGREE	0.0384	SPAR	NA	0.000334064	0.72669	NA	0.0761779
Scer_11.342	Spar_11.367	YKR076W	S000001784	ECM4	871	871	3670	4301	7495.21	7927.99	-1.02999	-0.88213	4789	8506	8706.16	9496.2	-0.862176	-0.158851	411	361	1588.38	1113.81	-1.94775	-1.62274	1390	1760	4592.41	3461.01	-1.72344	-0.975217	1	0	0	0.0002	SPAR	NA	NA	NA	LOW_COV	0.0078	SCER	NA	NA	NA	LOW_COV	0.000334064	NA	0.00872451	NA
Scer_11.343	Spar_11.368	YKR077W	S000001785	MSA2	971	971	12301	14190	10833.7	13534.6	0.183235	0.0682219	8934	11698	15372.6	16588.5	-0.782918	-0.503885	6400	3771	5731.28	3704.32	0.159187	0.0257333	7845	9219	14169.9	11328.5	-0.852901	-0.297242	1	1	1	0.2152	SCER	NA	0.7464	SPAR	NA	0.0002	SPAR	NA	NA	NA	REPS_DISAGREE	0.249749	0.813098	0.000243994	NA
Scer_11.344	Spar_11.369	YKR078W	S000001786	NA	1485	1485	10532	10615	8521.75	10255.4	0.305526	0.0497189	7848	10968	7012.91	9745.26	0.16229	0.170511	1970	989	1949.42	1295.25	0.0151408	-0.388844	1977	2056	2520.28	2948.89	-0.350112	-0.520119	1	0	0	0.3658	SCER	NA	NA	NA	LOW_COV	NA	NA	REPS_DISAGREE	NA	NA	LOW_COV	0.408568	NA	NA	NA
Scer_11.345	Spar_11.370	YKR079C	S000001787	TRZ1	2135	2135	41688	41405	57826.3	70646.3	-0.472084	-0.770794	15865	17382	26616.5	35475.3	-0.746436	-1.02918	9707	5940	5999.54	6487.34	0.694081	-0.127144	7401	5757	9850.63	12182.2	-0.412447	-1.08125	1	1	1	0.0002	SPAR	NA	0.0002	SCER	NA	NA	NA	REPS_DISAGREE	NA	NA	REPS_DISAGREE	0.000334064	0.000685507	NA	NA
Scer_11.346	Spar_11.371	YKR080W	S000001788	MTD1	653	653	34458	31174	36077.6	36484.9	-0.0662619	-0.226948	33473	49632	18144.2	32405.8	0.883454	0.615005	18326	9052	22779.9	12669.3	-0.313855	-0.484979	21476	21379	20904.8	19580.4	0.0388859	0.126775	1	1	1	0.0482	SPAR	NA	0.0076	SPAR	NA	0.0002	SCER	NA	0.0998	SPAR	NA	0.060919	0.0165051	0.000243994	0.178054
Scer_11.347	Spar_11.372	YKR081C	S000001789	RPF2	530	530	50394	53054	53495	50853.1	-0.0861504	0.0611247	18091	22220	30049.8	57702.9	-0.73205	-1.37674	33017	23818	36246.4	26649.9	-0.134623	-0.162072	21730	22656	36737.1	38396.9	-0.757524	-0.761069	1	1	1	NA	NA	REPS_DISAGREE	0.6414	SPAR	NA	0.0002	SPAR	NA	0.0002	SCER	NA	NA	0.722908	0.000243994	0.000633882
Scer_11.348	Spar_11.373	YKR082W	S000001790	NUP133	3018	3018	50400	55584	49049.6	51772.1	0.0391802	0.102492	24225	30101	30372	38642.7	-0.326231	-0.360372	15196	10372	17461.1	10131.2	-0.200441	0.033889	22788	17014	22082.8	29136.9	0.0453475	-0.77609	1	1	1	0.0704	SCER	NA	0.3538	SPAR	NA	0.0002	SPAR	NA	NA	NA	REPS_DISAGREE	0.0872472	0.453025	0.000243994	NA
Scer_11.349	Spar_11.374	YKR083C	S000001791	DAD2	309	309	5838	6525	5794.23	7817.83	0.0108544	-0.260753	5237	6914	2372.28	5494	1.14213	0.33161	1734	492	2085.57	775.134	-0.266198	-0.654719	1557	2625	1152.37	1080.97	0.43384	1.27921	1	0	0	NA	NA	REPS_DISAGREE	NA	NA	LOW_COV	0.0002	SCER	NA	NA	NA	LOW_COV	NA	NA	0.000243994	NA
Scer_11.35	Spar_11.52	YKL191W	S000001674	DPH2	1365	1365	81332	81425	52243.3	49420.9	0.638567	0.720338	36034	44875	28780.9	46030.4	0.324237	-0.0366742	27654	22126	25896.2	24542.2	0.0947463	-0.149517	29177	24960	30179.3	26157.2	-0.0487258	-0.0675854	1	1	1	0.0002	SCER	NA	0.0002	SPAR	NA	0.0002	SPAR	NA	0.996	SPAR	NA	0.000334064	0.000685507	0.000243994	1
Scer_11.350	Spar_11.375	YKR084C	S000001792	HBS1	1491	1491	45767	45755	45371	45487.7	0.0125379	0.00845246	29648	34801	23637.9	35163.5	0.326819	-0.0149492	23029	13004	22705.3	11743.9	0.020423	0.147027	25082	23536	21651.8	25522.8	0.212159	-0.116915	1	1	1	0.8406	SCER	NA	0.8958	SCER	NA	NA	NA	REPS_DISAGREE	0.4738	SPAR	NA	0.863	0.927975	NA	0.638209
Scer_11.351	Spar_11.376	YKR085C	S000001793	MRPL20	372	373	19195	18511	22897.2	12765.4	-0.250558	0.539984	9819	19787	12708.5	21934.8	-0.368235	-0.144787	10222	5596	15367.5	7457.01	-0.584281	-0.410265	7416	7630	13843.4	10654.5	-0.89652	-0.477786	1	1	1	NA	NA	REPS_DISAGREE	0.0002	SPAR	NA	NA	NA	REPS_DISAGREE	NA	NA	REPS_DISAGREE	NA	0.000685507	NA	NA
Scer_11.353	Spar_11.379	YKR087C	S000001795	OMA1	991	991	30371	34062	14517.3	19065.7	1.06487	0.837151	17651	24370	10202.8	13942.4	0.790725	0.805582	8602	5640	5262.33	4116.58	0.708863	0.454155	6082	4895	5772.52	5339.36	0.0753317	-0.125334	1	1	1	0.0002	SCER	NA	0.0008	SPAR	NA	0.4214	SPAR	NA	0.0002	SPAR	NA	0.000334064	0.0023017	0.426124	0.000633882
Scer_11.354	Spar_11.380	YKR088C	S000001796	TVP38	879	879	23106	33115	27357.5	32530.8	-0.243658	0.0256787	21862	31427	19585.4	26596.6	0.15864	0.240756	9034	6610	10172.7	6272.64	-0.171248	0.0755655	12966	10090	8873.25	10105.7	0.547148	-0.00224449	1	1	1	NA	NA	REPS_DISAGREE	0.5802	SCER	NA	0.0002	SCER	NA	NA	NA	REPS_DISAGREE	NA	0.667724	0.000243994	NA
Scer_11.355	Spar_11.381	NA	NA	NA	1949	1977	39278	49906	26750.5	29140.4	0.574719	0.796749	35913	42191	19178.3	24221.9	0.925574	0.821178	7564	4106	6145.78	4308.09	0.320089	-0.0487208	13228	11281	7458.4	10006.9	0.847152	0.193466	1	1	1	0.0002	SCER	NA	0.0004	SPAR	NA	0.0302	SCER	NA	0.0028	SPAR	NA	0.000334064	0.00125798	0.032488	0.00710283
Scer_11.356	Spar_11.382	YKR090W	S000001798	PXL1	1799	1814	25836	29787	35149.2	33439.9	-0.432117	-0.154903	15882	22370	23967.1	27741.4	-0.58165	-0.298483	9846	9924	11480.7	7367.3	-0.209603	0.441714	11708	12446	15443.9	15938.4	-0.387533	-0.344823	1	1	1	0.0002	SPAR	NA	0.0002	SCER	NA	NA	NA	REPS_DISAGREE	0.9902	SPAR	NA	0.000334064	0.000685507	NA	1
Scer_11.357	Spar_11.383	YKR091W	S000001799	SRL3	559	601	5374	6653	9407.45	7883.33	-0.703175	-0.14025	4462	10714	46570.8	59112.3	-3.27886	-2.35933	2542	1338	3936.16	1618.81	-0.526107	-0.170153	1210	1785	23344	19045	-4.16433	-3.31016	1	0	0	0.0768	SPAR	NA	NA	NA	LOW_COV	0.0002	SPAR	NA	NA	NA	LOW_COV	0.0947101	NA	0.000243994	NA
Scer_11.358	Spar_11.384	YKR092C	S000001800	SRP40	1088	1013	123132	112603	130948	104365	-0.191837	0.00656091	55687	73542	81670	93125.8	-0.655503	-0.443652	109786	70819	94297.4	64409.7	0.116357	0.0338114	85612	116613	94131.6	93146.3	-0.239908	0.221111	1	1	1	NA	NA	REPS_DISAGREE	0.599	SCER	NA	0.0002	SPAR	NA	0.0002	SCER	NA	NA	0.684365	0.000243994	0.000633882
Scer_11.359	Spar_11.385	YKR093W	S000001801	PTR2	1303	1303	60587	64644	107728	104073	-0.830302	-0.687003	23404	28881	67159.2	62250.5	-1.52079	-1.10794	65015	49222	110174	70022.1	-0.760932	-0.508499	98208	88497	165694	172434	-0.754601	-0.962339	1	1	1	0.0002	SPAR	NA	0.3016	SCER	NA	0.0002	SPAR	NA	0.0002	SCER	NA	0.000334064	0.397816	0.000243994	0.000633882
Scer_11.36	Spar_11.53	YKL190W	S000001673	CNB1	281	281	21653	22453	18964.7	17233.6	0.191244	0.381668	18752	26712	14018.9	21323.3	0.419646	0.325045	8985	5754	10379.4	8385.36	-0.208117	-0.543229	12270	16708	8239.45	8535.14	0.574458	0.96897	1	1	1	0.0052	SCER	NA	0.0002	SPAR	NA	NA	NA	REPS_DISAGREE	0.2062	SCER	NA	0.00740504	0.000685507	NA	0.329089
Scer_11.364	Spar_11.391	YKR097W	S000001805	PCK1	1091	1091	617	345	3610.24	4415.58	-2.54681	-3.67409	1275	2292	3059.97	4484.86	-1.26236	-0.968149	87	29	559.715	192.524	-2.67169	-2.68948	102	303	1233.46	1227.35	-3.58317	-2.01458	1	0	0	0.0002	SPAR	NA	NA	NA	LOW_COV	0.0002	SCER	NA	NA	NA	LOW_COV	0.000334064	NA	0.000243994	NA
Scer_11.365	Spar_11.392	YKR098C	S000001806	UBP11	1933	1913	11223	15237	16214.3	18427.5	-0.545777	-0.289272	9652	13908	14772.4	16795.5	-0.628958	-0.287145	1037	368	1096.24	1239.81	-0.0950712	-1.7646	1087	1154	2528.81	2859.64	-1.23236	-1.32345	1	0	0	0.0002	SPAR	NA	NA	NA	LOW_COV	NA	NA	REPS_DISAGREE	NA	NA	LOW_COV	0.000334064	NA	NA	NA
Scer_11.366	Spar_11.393	YKR099W	S000001807	BAS1	2058	2055	26544	33422	27292	28307.7	-0.042196	0.237489	12516	15521	15059.1	19165.9	-0.268946	-0.306405	7763	7309	6129.64	5190.07	0.338658	0.491734	5051	4336	8072.99	7482.11	-0.678532	-0.789046	1	1	1	NA	NA	REPS_DISAGREE	0.0022	SCER	NA	0.0002	SPAR	NA	0.4228	SPAR	NA	NA	0.00552335	0.000243994	0.586219
Scer_11.367	Spar_11.394	YKR100C	S000001808	SKG1	752	755	16859	17207	15547.8	19896.4	0.122543	-0.203757	14781	20002	11749.7	17806.3	0.336842	0.173489	4768	1930	3606.38	2236.7	0.408479	-0.206925	5469	4590	4993.6	5652.98	0.136915	-0.294713	1	1	1	NA	NA	REPS_DISAGREE	NA	NA	REPS_DISAGREE	0.0002	SCER	NA	0.8206	SPAR	NA	NA	NA	0.000243994	0.933571
Scer_11.368	Spar_11.395	YKR101W	S000001809	SIR1	1814	1826	8970	6860	10899.2	10276.2	-0.271495	-0.573447	7660	12005	6417.02	10416	0.264916	0.214326	1306	566	1222.3	912.219	0.104996	-0.6781	2791	2665	1886.47	2120.65	0.574356	0.339004	1	0	0	0.0002	SPAR	NA	NA	NA	LOW_COV	0.0002	SCER	NA	NA	NA	LOW_COV	0.000334064	NA	0.000243994	NA
Scer_11.39	Spar_11.60	YKL189W	S000001672	HYM1	844	844	6887	11256	8812.35	8553.26	-0.355606	0.396107	7165	12524	6177.11	7307.87	0.214002	0.77709	2128	1026	2596.88	1350.69	-0.287157	-0.396327	3421	3623	4814.35	3215.79	-0.4928	0.171959	1	0	0	NA	NA	REPS_DISAGREE	NA	NA	LOW_COV	NA	NA	REPS_DISAGREE	NA	NA	LOW_COV	NA	NA	NA	NA
Scer_11.40	Spar_11.61	YKL188C	S000001671	PXA2	2051	2051	6456	9551	2109.61	3029.07	1.6132	1.65645	3786	5295	1762.54	2116.18	1.10258	1.32276	314	658	447.772	332.632	-0.510632	0.982019	181	116	407.598	422.044	-1.16674	-1.8543	1	0	0	0.0002	SCER	NA	NA	NA	LOW_COV	0.0002	SPAR	NA	NA	NA	LOW_COV	0.000334064	NA	0.000243994	NA
Scer_11.41	Spar_11.62	YKL187C	S000001670	FAT3	1810	1798	4775	4531	9176.35	6370.78	-0.951872	-0.501145	3264	4724	14256.2	11476.7	-2.13613	-1.29004	90	27	5923.91	1558.33	-6.03438	-5.80895	279	175	13205.3	11171.7	-5.56925	-5.99785	1	0	0	0.0002	SPAR	NA	NA	NA	LOW_COV	0.0002	SPAR	NA	NA	NA	LOW_COV	0.000334064	NA	0.000243994	NA
Scer_11.42	Spar_11.63	YKL186C	S000001669	MTR2	470	473	19831	18643	19132.3	27170.4	0.0609255	-0.534195	17707	27425	20645.5	28414.7	-0.212318	-0.041966	11537	7809	14828.9	8551.68	-0.352939	-0.121874	13153	15437	21583.5	17833	-0.705312	-0.198969	1	1	1	NA	NA	REPS_DISAGREE	NA	NA	REPS_DISAGREE	NA	NA	REPS_DISAGREE	NA	NA	REPS_DISAGREE	NA	NA	NA	NA
Scer_11.43	Spar_11.64	YKL185W	S000001668	ASH1	1424	1421	40276	51664	40539.8	53520.9	-0.0124609	-0.0539848	37079	48255	37710.5	40875.6	-0.0274067	0.236389	14430	11271	11115.6	10981.9	0.373407	0.0344406	24254	22547	28446.5	24350.1	-0.233061	-0.114032	1	1	1	0.7042	SPAR	NA	0.2186	SCER	NA	NA	NA	REPS_DISAGREE	0.4634	SPAR	NA	0.738315	0.305008	NA	0.627652
Scer_11.44	Spar_11.65	YKL184W	S000001667	SPE1	1241	1241	76487	75625	75049.3	76006.7	0.0273754	-0.00726352	31892	42360	34265.1	47528.2	-0.103543	-0.166078	44741	30000	40257.1	23865.9	0.152349	0.330001	51039	53653	34041.9	37938.1	0.584276	0.499999	1	1	1	NA	NA	REPS_DISAGREE	0.0068	SCER	NA	0.0002	SPAR	NA	0.7534	SCER	NA	NA	0.0148907	0.000243994	0.885927
Scer_11.46	Spar_11.66	YKL183W	S000001666	LOT5	467	464	11172	7335	7944.51	6607.98	0.482508	0.141267	8235	14204	9575.74	15441.1	-0.226888	-0.129767	4767	1896	4107.6	3742.62	0.205438	-0.990012	4730	5344	8930.87	7412.05	-0.926115	-0.481175	1	1	1	0.1386	SCER	NA	0.0014	SPAR	NA	0.0004	SPAR	NA	0.793	SPAR	NA	0.164778	0.00375397	0.000478845	0.91453
Scer_11.47	Spar_11.67	YKL182W	S000001665	FAS1	3828	3828	290041	357607	260703	327176	0.15385	0.128309	124093	161089	111271	142819	0.157341	0.173668	399832	208539	365213	203198	0.130656	0.0374302	445439	361860	399840	466143	0.155803	-0.365339	1	1	1	0.0002	SCER	NA	0.5248	SPAR	NA	0.6358	SCER	NA	0.0018	SPAR	NA	0.000334064	0.618412	0.637463	0.00474481
Scer_11.48	Spar_11.68	YKL181W	S000001664	PRS1	818	818	157503	165911	134195	151640	0.23105	0.129756	78123	106178	116823	184633	-0.580498	-0.798167	39706	31521	35414.3	25542.1	0.165019	0.303423	42965	32684	55305.2	53173	-0.364247	-0.702092	1	1	1	0.0002	SCER	NA	NA	NA	REPS_DISAGREE	0.0002	SPAR	NA	NA	NA	REPS_DISAGREE	0.000334064	NA	0.000243994	NA
Scer_11.50	Spar_11.70	YKL179C	S000001662	COY1	1623	1620	32396	34836	27446.7	31039.1	0.236504	0.163819	25549	33285	18753.1	25836.5	0.443451	0.36278	7765	3603	6736.75	5185.03	0.202235	-0.527702	10337	10503	10409.7	10591.1	-0.0127852	-0.0147253	1	1	1	0.0002	SCER	NA	0.5698	SPAR	NA	0.0002	SCER	NA	0.25	SPAR	NA	0.000334064	0.658962	0.000243994	0.38596
Scer_11.51	Spar_11.71	YKL178C	S000001661	STE3	1189	1189	129	367	538.56	1101.66	-2.05327	-1.58321	88863	124736	673.835	855.405	7.04092	7.18638	27	0	350.957	81.6461	-3.6519	-6.36888	64186	44733	66.1546	298.601	9.90058	7.22219	0	0	0	NA	NA	NA	NA	NA	NA	NA	NA	NA	NA	NA	NA	NA	NA	NA	NA
Scer_11.52	Spar_11.72	YKL176C	S000001659	LST4	2081	2081	37374	44175	34770.4	50923.6	0.104174	-0.205099	15193	18492	18221.3	20226.5	-0.262201	-0.129342	3129	2127	2291.3	1987.73	0.449365	0.0976502	3463	2778	3832.7	3093.6	-0.146298	-0.155188	1	1	1	NA	NA	REPS_DISAGREE	0.009	SCER	NA	NA	NA	REPS_DISAGREE	0.482	SPAR	NA	NA	0.0190726	NA	0.646345
Scer_11.53	Spar_11.73	YKL175W	S000001658	ZRT3	1331	1409	35238	30304	30977.6	32887.1	0.268061	-0.035848	22507	33724	22056.4	27417.6	0.111335	0.380824	12141	8440	13865.8	8891.37	-0.109469	0.00700774	21242	17819	17059.3	17622.4	0.398502	0.0981629	1	1	1	NA	NA	REPS_DISAGREE	NA	NA	REPS_DISAGREE	NA	NA	REPS_DISAGREE	NA	NA	REPS_DISAGREE	NA	NA	NA	NA
Scer_11.54	Spar_11.74	YKL174C	S000001657	TPO5	1399	1399	22804	21488	21219.1	22404.4	0.10392	-0.0602496	16000	20279	12457.3	15680.7	0.361056	0.370975	5476	2974	4293.17	4870.54	0.351007	-0.71149	10805	6505	3922.33	5074.54	1.46168	0.358209	1	1	1	NA	NA	REPS_DISAGREE	NA	NA	REPS_DISAGREE	0.0002	SCER	NA	0.001	SCER	NA	NA	NA	0.000243994	0.00276591
Scer_11.55	Spar_11.75	YKL173W	S000001656	SNU114	2675	2675	33389	38936	40416.8	40000.2	-0.275575	-0.0389031	18724	21620	22292.9	30037.1	-0.251681	-0.474359	9808	7801	10848.4	8177.72	-0.145436	-0.0680307	12322	10466	11248.4	15031	0.131504	-0.522184	1	1	1	0.2508	SPAR	NA	NA	NA	REPS_DISAGREE	NA	NA	REPS_DISAGREE	NA	NA	REPS_DISAGREE	0.287919	NA	NA	NA
Scer_11.56	Spar_11.76	YKL172W	S000001655	EBP2	1067	1062	138331	136726	146013	132526	-0.0847512	0.0382363	53281	58498	68717.3	115497	-0.373823	-0.988158	71122	51115	99997.4	59416.2	-0.498366	-0.223882	43917	45521	80687.2	95890.8	-0.884323	-1.08162	1	1	1	NA	NA	REPS_DISAGREE	0.0002	SPAR	NA	0.0002	SPAR	NA	NA	NA	REPS_DISAGREE	NA	0.000685507	0.000243994	NA
Scer_11.57	Spar_11.77	YKL171W	S000001654	NNK1	2465	2465	16825	18054	9187.26	10508.5	0.872828	0.78071	11251	15272	7572.42	7336.21	0.571165	1.05768	1829	2168	798.729	1350.69	1.19426	0.682267	3093	3249	1288.95	1055.95	1.26216	1.62054	1	0	0	0.0002	SCER	NA	NA	NA	LOW_COV	NA	NA	REPS_DISAGREE	NA	NA	LOW_COV	0.000334064	NA	NA	NA
Scer_11.58	Spar_11.78	YKL170W	S000001653	MRPL38	292	292	13148	15830	11262.2	13753.9	0.223342	0.202807	8492	13976	7463.29	13456.3	0.18627	0.0546649	6639	4115	7181.5	4525.82	-0.113303	-0.137254	5406	7341	7104.15	6268.53	-0.394036	0.227816	1	1	1	0.0078	SCER	NA	0.001	SPAR	NA	0.55	SPAR	NA	NA	NA	REPS_DISAGREE	0.0108778	0.00279882	0.552884	NA
Scer_11.59	Spar_11.79	YKL168C	S000001651	KKQ8	1939	1936	14946	17255	19037.1	18874.1	-0.351265	-0.131623	12559	15326	12243.4	17427.6	0.0344852	-0.187614	2819	3407	4136.85	4448.2	-0.55542	-0.386855	4798	4324	6749.9	6643.86	-0.49458	-0.621773	1	1	1	0.0106	SPAR	NA	0.0168	SPAR	NA	NA	NA	REPS_DISAGREE	NA	NA	REPS_DISAGREE	0.0145454	0.0328907	NA	NA
Scer_11.60	Spar_11.80	YKL167C	S000001650	MRP49	342	342	12784	14327	12782.6	15033.2	0.000155365	-0.0694123	8898	15639	8215.07	12802.7	0.115194	0.288676	6514	2173	5580.01	3109.61	0.223239	-0.516845	5626	5949	4720.45	5296.41	0.253136	0.167603	1	1	1	NA	NA	REPS_DISAGREE	NA	NA	REPS_DISAGREE	0.0002	SCER	NA	0.1952	SCER	NA	NA	NA	0.000243994	0.314327
Scer_11.61	Spar_11.81	YKL166C	S000001649	TPK3	874	874	19681	14543	34715.8	34413.5	-0.818758	-1.24259	13746	16728	17777	27628	-0.370972	-0.723834	5077	4673	9677.53	7279.61	-0.930527	-0.639402	6049	6222	9440.9	9119.41	-0.642142	-0.551489	1	1	1	0.0002	SPAR	NA	NA	NA	REPS_DISAGREE	0.0002	SCER	NA	0.0002	SCER	NA	0.000334064	NA	0.000243994	0.000633882
Scer_11.63	Spar_11.83	YKL165C	S000001648	MCD4	2246	2246	26402	26990	37608	37927.9	-0.510375	-0.49082	15214	19292	19084.8	19165	-0.327004	0.00952683	10792	5985	19645.5	10408.4	-0.864177	-0.798219	16743	10643	12294.1	20520.4	0.445563	-0.947092	1	1	1	0.0002	SPAR	NA	0.0002	SPAR	NA	0.0002	SCER	NA	0.0002	SCER	NA	0.000334064	0.000685507	0.000243994	0.000633882
Scer_11.70	Spar_11.91	YKL162C	S000001645	NA	992	992	2987	4188	4657.6	2874.25	-0.640718	0.542921	3126	4784	3286.03	4059.74	-0.0720051	0.236777	347	972	754.355	27.2154	-1.11807	5.10789	2010	1200	710.628	686.865	1.49872	0.804039	1	0	0	NA	NA	REPS_DISAGREE	NA	NA	LOW_COV	NA	NA	REPS_DISAGREE	NA	NA	LOW_COV	NA	NA	NA	NA
Scer_11.74	Spar_11.94	YKL159C	S000001642	RCN1	636	657	6425	6506	10702.8	14007	-0.689259	-1.05932	4868	8395	9464.01	15159.4	-0.912111	-0.805666	3004	1766	4006.75	2309.28	-0.368563	-0.339896	3626	3977	9031.17	6846.54	-1.26943	-0.736677	1	1	1	0.0002	SPAR	NA	0.0002	SCER	NA	NA	NA	REPS_DISAGREE	NA	NA	REPS_DISAGREE	0.000334064	0.000685507	NA	NA
Scer_11.78	Spar_11.98	YKL155C	S000001638	RSM22	1635	1635	22575	25116	27365.4	25517.9	-0.277616	-0.0228996	10461	13154	14340.2	21145.5	-0.455009	-0.684808	8126	4099	8947.38	6117.41	-0.138903	-0.577533	4748	4589	9940.26	9753.73	-1.0658	-1.08761	1	1	1	0.6352	SPAR	NA	NA	NA	REPS_DISAGREE	0.0002	SPAR	NA	0.0138	SPAR	NA	0.675671	NA	0.000243994	0.0306743
Scer_11.79	Spar_11.99	YKL154W	S000001637	SRP102	637	637	20601	20687	34663.2	28437.8	-0.750664	-0.459064	14985	26678	23489	40150.8	-0.648429	-0.589759	4144	1746	8133.52	5043.92	-0.972685	-1.52995	7741	5387	11314.6	12403.6	-0.547531	-1.20305	1	1	1	0.0002	SPAR	NA	0.02	SPAR	NA	NA	NA	REPS_DISAGREE	0.0002	SCER	NA	0.000334064	0.0383929	NA	0.000633882
Scer_11.83	Spar_11.103	YKL152C	S000001635	GPM1	307	307	740851	749233	701033	571831	0.0797012	0.389825	757849	1559950	812037	1.33975e+06	-0.0996354	0.219537	621496	450645	529129	418006	0.232126	0.108467	1056318	1009901	1.33147e+06	1.24208e+06	-0.33398	-0.298549	1	1	1	0.0442	SCER	NA	NA	NA	REPS_DISAGREE	NA	NA	REPS_DISAGREE	0.4942	SPAR	NA	0.0561468	NA	NA	0.658119
Scer_11.84	Spar_11.104	YKL151C	S000001634	NA	851	854	11462	12364	28526.8	31794.4	-1.31031	-1.35748	14068	22683	27539.8	43435.8	-0.963972	-0.932167	2636	3834	8034.69	3239.64	-1.60245	0.248026	5927	7090	13576.6	12492	-1.19054	-0.811984	1	1	1	0.0002	SPAR	NA	NA	NA	REPS_DISAGREE	0.0002	SCER	NA	0.0146	SCER	NA	0.000334064	NA	0.000243994	0.0321606
Scer_11.85	Spar_11.105	YKL150W	S000001633	MCR1	736	736	40575	44740	52333.6	56217.5	-0.367138	-0.329447	26312	49345	67665	98506.4	-1.36266	-0.997299	19901	10489	34243.5	17430.9	-0.782958	-0.732719	14474	12740	87403	75734	-2.59414	-2.57148	1	1	1	0.0002	SPAR	NA	0.0002	SPAR	NA	0.0002	SPAR	NA	0.0002	SPAR	NA	0.000334064	0.000685507	0.000243994	0.000633882
Scer_11.86	Spar_11.106	YKL149C	S000001632	DBR1	1029	1029	12899	16368	10793	10708.9	0.257138	0.612015	10293	15374	10447.9	15723.6	-0.0215488	-0.0324411	2635	2322	3632.6	1650.06	-0.46305	0.492598	2941	2607	4530.52	4857.68	-0.623198	-0.897621	1	1	1	0.0002	SCER	NA	0.4164	SPAR	NA	0.0002	SPAR	NA	0.001	SPAR	NA	0.000334064	0.516677	0.000243994	0.00276591
Scer_11.87	Spar_11.107	NA	NA	NA	1173	1170	25547	24800	33352.1	34534.6	-0.388303	-0.481381	13266	15806	19309.1	24114.5	-0.545208	-0.613092	13901	9328	16357.8	9839.87	-0.23847	-0.0807582	14228	11715	19556.1	16368	-0.462556	-0.486179	1	1	1	0.0002	SPAR	NA	0.0236	SCER	NA	0.0232	SPAR	NA	0.0002	SCER	NA	0.000334064	0.0442968	0.0251163	0.000633882
Scer_11.88	Spar_11.110	YKL146W	S000001629	AVT3	1538	1547	30915	33675	24227.3	31429.1	0.36008	0.107991	18110	24560	16664.9	19959.4	0.128388	0.307643	17225	10108	10542.8	9839.87	0.716608	0.0472	16710	18122	15682.9	12420.3	0.0999311	0.553425	1	1	1	0.0138	SCER	NA	NA	NA	REPS_DISAGREE	NA	NA	REPS_DISAGREE	0.6324	SPAR	NA	0.018659	NA	NA	0.787898
Scer_11.89	Spar_11.111	YKL145W	S000001628	RPT1	1048	1048	116752	125786	102337	112078	0.190113	0.166471	96741	126675	70140.4	117140	0.463877	0.1129	72927	45970	79832.6	60746.7	-0.130522	-0.402107	76604	94111	76683.8	78794.7	-0.00150264	0.256262	1	1	1	0.0002	SCER	NA	0.0002	SPAR	NA	NA	NA	REPS_DISAGREE	NA	NA	REPS_DISAGREE	0.000334064	0.000685507	NA	NA
Scer_11.90	Spar_11.112	YKL144C	S000001627	RPC25	435	435	16523	15296	15069.8	13197.1	0.13281	0.212917	8971	14016	8836.08	16433.9	0.0218606	-0.229586	4428	1770	4979.95	4542.95	-0.169441	-1.35938	5224	5110	4980.8	4894.8	0.068764	0.0620617	1	1	1	0.0072	SCER	NA	0.0002	SPAR	NA	0.0002	SPAR	NA	0.0512	SCER	NA	0.0100812	0.000685507	0.000243994	0.0983128
Scer_11.91	Spar_11.113	YKL143W	S000001626	LTV1	1162	1162	56892	54282	47620.4	42088.4	0.25664	0.367042	23362	28480	32483.5	53024.8	-0.475527	-0.896694	23212	16604	22420.9	18005.5	0.0500254	-0.1169	15627	14664	30377.8	32157.5	-0.95893	-1.13282	1	1	1	0.0002	SCER	NA	0.001	SPAR	NA	0.0002	SPAR	NA	0.1418	SPAR	NA	0.000334064	0.00279882	0.000243994	0.240712
Scer_11.92	Spar_11.114	YKL142W	S000001625	MRP8	513	513	25870	20202	16509.9	16591.4	0.647917	0.284045	38342	64237	13078.3	21425.5	1.55168	1.58403	15942	5351	8787.03	6490.36	0.859312	-0.278444	29411	34819	17309	12763.1	0.764797	1.44783	1	1	1	0.0002	SCER	NA	NA	NA	REPS_DISAGREE	0.0002	SCER	NA	0.0994	SPAR	NA	0.000334064	NA	0.000243994	0.177693
Scer_11.93	Spar_11.115	YKL141W	S000001624	SDH3	420	420	24785	22923	26173.2	26177.9	-0.0786219	-0.191544	18415	29777	19069.2	30451	-0.0503595	-0.0322919	15530	11459	20973.7	14186.3	-0.433499	-0.30799	19532	14799	16732.8	17817.6	0.223145	-0.267788	1	1	1	0.1066	SPAR	NA	0.2938	SPAR	NA	0.3788	SCER	NA	0.0022	SCER	NA	0.128565	0.38992	0.384186	0.00570983
Scer_11.94	Spar_11.116	YKL140W	S000001623	TGL1	1255	1255	14979	20560	13591	14496.3	0.140284	0.504128	18941	26204	13015.1	16914	0.541295	0.631539	3518	2390	4434.36	2634.85	-0.333885	-0.140655	12317	7887	5083.23	7275.26	1.27667	0.116462	1	1	1	0.0002	SCER	NA	0.0002	SPAR	NA	0.0894	SCER	NA	NA	NA	REPS_DISAGREE	0.000334064	0.000685507	0.0935482	NA
Scer_11.95	Spar_11.117	YKL139W	S000001622	CTK1	1257	1286	23370	27334	24047.8	31589.9	-0.00833683	-0.175854	16935	24992	17523.2	25165.7	-0.0163478	0.022912	5453	2357	6952.57	4972.35	-0.317534	-1.04375	5590	5612	6163.05	5779.76	-0.107865	-0.0095802	1	1	1	0.754	SPAR	NA	0.0006	SPAR	NA	NA	NA	REPS_DISAGREE	0.0006	SCER	NA	0.785828	0.00177375	NA	0.00172141
Scer_11.97	Spar_11.119	YKL138C	S000001621	MRPL31	311	311	14476	11736	14409.2	12686	0.00667091	-0.112285	7793	13614	8607.42	13080.1	-0.143385	0.0577092	15684	8399	10133.4	8248.28	0.630129	0.0261218	8606	8671	7422.12	8180.24	0.213485	0.0840456	1	1	1	NA	NA	REPS_DISAGREE	0.312	SCER	NA	NA	NA	REPS_DISAGREE	0.9348	SPAR	NA	NA	0.409933	NA	0.989918
Scer_11.98	Spar_11.120	YKL137W	S000001620	CMC1	325	325	8722	10199	6627.37	7406.94	0.396171	0.461425	6163	15519	5021.72	7565.52	0.295399	1.03643	2854	1549	3479.31	1947.41	-0.285726	-0.33003	2485	3144	3196.76	3101.53	-0.363235	0.0196168	1	1	1	0.0002	SCER	NA	0.0002	SPAR	NA	NA	NA	REPS_DISAGREE	0.568	SPAR	NA	0.000334064	0.000685507	NA	0.731449
Scer_11.99	Spar_11.121	YKL135C	S000001618	APL2	1735	1735	33020	36687	44380.1	56167.9	-0.426563	-0.614463	21431	29909	29307.5	41708.7	-0.451553	-0.479756	12245	7886	14455.8	9703.79	-0.239436	-0.299221	15959	11558	15941.1	20923.7	0.00161716	-0.856192	1	1	1	0.0002	SPAR	NA	0.0008	SCER	NA	NA	NA	REPS_DISAGREE	NA	NA	REPS_DISAGREE	0.000334064	0.0023017	NA	NA
Scer_12.101	Spar_12.85	YLR011W	S000004001	LOT6	546	549	5135	3070	10754.3	11010.7	-1.05843	-1.83435	4988	10195	13307.8	20288.4	-1.40765	-0.984816	1660	415	4289.13	3123.72	-1.36107	-2.90117	3006	2519	6291.09	7221.46	-1.05731	-1.51116	1	1	1	0.0002	SPAR	NA	0.0082	SPAR	NA	NA	NA	REPS_DISAGREE	0.0002	SCER	NA	0.000334064	0.017614	NA	0.000633882
Scer_12.102	Spar_12.86	YLR012C	S000004002	NA	227	227	40	0	280.686	42.677	-2.78039	-5.4488	54	22	273.691	385.619	-2.32031	-4.07121	0	0	0	0	0	0	72	0	55.4845	10.426	0.370042	-3.51425	0	0	0	NA	NA	NA	NA	NA	NA	NA	NA	NA	NA	NA	NA	NA	NA	NA	NA
Scer_12.103	Spar_12.87	YLR013W	S000004003	GAT3	364	358	0	0	29.7547	327.521	-4.96671	-8.38382	0	29	0	0	-0.0239789	4.88291	0	0	0	0	-0.0239789	-0.0239789	0	0	0	0	-0.0239789	-0.0239789	0	0	0	NA	NA	NA	NA	NA	NA	NA	NA	NA	NA	NA	NA	NA	NA	NA	NA
Scer_12.104	Spar_12.88	YLR014C	S000004004	PPR1	2344	2344	18092	15141	18679	20293.4	-0.046064	-0.422526	6583	8086	12286.7	15643.8	-0.900175	-0.952004	1404	1003	2084.56	1691.39	-0.569866	-0.753299	1917	1644	4637.22	5436.95	-1.27397	-1.72498	1	0	0	0.0824	SPAR	NA	NA	NA	LOW_COV	0.0002	SPAR	NA	NA	NA	LOW_COV	0.100977	NA	0.000243994	NA
Scer_12.105	Spar_12.89	YLR015W	S000004005	BRE2	1396	1396	19034	17635	16599.2	14939.9	0.197457	0.239254	11010	13743	11791.3	19719.8	-0.0988935	-0.520918	4748	3957	3725.38	4096.42	0.349847	-0.0499437	4917	5361	4411.02	5918.21	0.156633	-0.142634	1	1	1	0.0004	SCER	NA	NA	NA	REPS_DISAGREE	0.0002	SPAR	NA	0.9952	SCER	NA	0.000643008	NA	0.000243994	1
Scer_12.106	Spar_12.90	YLR016C	S000004006	PML1	488	488	10587	10534	12411.7	10342.7	-0.229385	0.0264356	8998	12363	9769.74	17357.2	-0.118704	-0.489468	2216	3388	3205	3924.05	-0.532166	-0.211853	3161	3318	3501.92	4016.93	-0.147723	-0.275703	1	1	1	NA	NA	REPS_DISAGREE	0.0552	SPAR	NA	NA	NA	REPS_DISAGREE	0.004	SCER	NA	NA	0.0941905	NA	0.00976972
Scer_12.107	Spar_12.91	YLR017W	S000004007	MEU1	806	806	59045	51304	45547.5	40012.2	0.374435	0.358625	36386	48976	28382.5	43132.7	0.358371	0.18329	29168	20389	25578.5	15554.1	0.189449	0.390475	33886	34432	38194.7	31602	-0.172677	0.123729	1	1	1	0.0002	SCER	NA	NA	NA	REPS_DISAGREE	0.7318	SPAR	NA	0.0004	SPAR	NA	0.000334064	NA	0.732995	0.00118809
Scer_12.108	Spar_12.92	YLR018C	S000004008	POM34	736	736	22879	19977	22623.5	21667	0.0162013	-0.117154	20443	29040	21306.4	31694.6	-0.0596742	-0.126193	7915	8154	8753.75	7654.58	-0.145294	0.0911737	12115	9418	11835.3	12313.9	0.0336992	-0.386764	1	1	1	NA	NA	REPS_DISAGREE	NA	NA	REPS_DISAGREE	NA	NA	REPS_DISAGREE	NA	NA	REPS_DISAGREE	NA	NA	NA	NA
Scer_12.109	Spar_12.93	YLR019W	S000004009	PSR2	826	820	24073	20389	17749.7	22986	0.429084	-0.183476	17218	21402	16618.1	21081.1	0.0406418	0.0112772	7077	7330	5312.76	3808.14	0.403092	0.934028	12286	12846	10373.5	8958.02	0.233578	0.509501	1	1	1	NA	NA	REPS_DISAGREE	NA	NA	REPS_DISAGREE	NA	NA	REPS_DISAGREE	0.2834	SPAR	NA	NA	NA	NA	0.429404
Scer_12.110	Spar_12.94	YLR020C	S000004010	YEH2	1163	1163	24615	24274	23399.1	18838.4	0.0730814	0.365717	16286	21052	15316.3	23648.2	0.0885564	-0.167763	4839	3178	5712.12	4052.07	-0.239272	-0.350441	7026	4597	7112.68	8322.03	-0.0176881	-0.856103	1	1	1	0.0114	SCER	NA	0.0002	SPAR	NA	NA	NA	REPS_DISAGREE	NA	NA	REPS_DISAGREE	0.015564	0.000685507	NA	NA
Scer_12.111	Spar_12.95	YLR021W	S000004011	IRC25	405	408	12176	11354	14180.1	13525.6	-0.209164	-0.241827	9952	16715	8460.18	15047.7	0.244919	0.162234	5526	4283	5866.42	4753.62	-0.0755829	-0.139724	5494	4560	3994.88	3682.88	0.470252	0.318772	1	1	1	0.0082	SPAR	NA	0.4536	SCER	NA	0.0002	SCER	NA	0.6526	SCER	NA	0.0114084	0.5544	0.000243994	0.8061
Scer_12.112	Spar_12.96	YLR022C	S000004012	SDO1	538	538	21446	22998	19418.9	20380.7	0.143239	0.174294	13972	20930	20067	34312.4	-0.522252	-0.71313	16181	10453	11856.9	6515.56	0.448543	0.681872	12515	14331	17163.9	16704.1	-0.455689	-0.22105	1	1	1	0.0006	SCER	NA	0.0012	SCER	NA	0.0002	SPAR	NA	0.7044	SPAR	NA	0.000945863	0.00329234	0.000243994	0.852495
Scer_12.113	Spar_12.97	YLR023C	S000004013	IZH3	1285	1285	20877	23761	25157.6	24399.3	-0.269069	-0.038244	9713	12474	16180.7	18279.6	-0.736226	-0.55127	4964	5417	8924.18	7222.16	-0.846088	-0.414869	5272	4297	8585.16	9838.39	-0.703389	-1.1949	1	1	1	0.3814	SPAR	NA	0.002	SPAR	NA	0.0002	SPAR	NA	0.0002	SCER	NA	0.42437	0.00510799	0.000243994	0.000633882
Scer_12.114	Spar_12.98	YLR024C	S000004014	UBR2	4410	4398	15691	20920	12957.2	18082.1	0.272235	0.206376	5191	5795	5615	6391.49	-0.117185	-0.145251	3225	841	2520.23	560.435	0.351687	0.58077	4190	2840	2710.2	3290.86	0.62443	-0.216436	1	0	0	0.0002	SCER	NA	NA	NA	LOW_COV	0.0002	SPAR	NA	NA	NA	LOW_COV	0.000334064	NA	0.000243994	NA
Scer_12.115	Spar_12.99	YLR025W	S000004015	SNF7	451	451	21668	25037	26636.4	28064.6	-0.297822	-0.164683	21306	26874	17273.7	31339.1	0.302663	-0.221744	11432	8609	12467	10586.8	-0.125029	-0.298315	12367	12581	15032	13922.5	-0.281523	-0.146157	1	1	1	0.0022	SPAR	NA	NA	NA	REPS_DISAGREE	NA	NA	REPS_DISAGREE	NA	NA	REPS_DISAGREE	0.00326139	NA	NA	NA
Scer_12.116	Spar_12.100	YLR026C	S000004016	SED5	759	759	18491	17207	18578.8	15096.7	-0.00683686	0.188747	13702	18030	10485.2	13720	0.386006	0.394097	12055	5936	10148.5	8185.78	0.248343	-0.463562	8804	12792	10542.1	9005.56	-0.259898	0.506307	1	1	1	NA	NA	REPS_DISAGREE	NA	NA	REPS_DISAGREE	0.0008	SCER	NA	NA	NA	REPS_DISAGREE	NA	NA	0.000944419	NA
Scer_12.117	Spar_12.101	YLR027C	S000004017	AAT2	1067	1067	143298	125865	100814	91121.3	0.507319	0.466012	107998	174345	61202.9	85556.8	0.819321	1.02698	101334	67600	72153.9	43620.2	0.489964	0.632015	144007	154534	97228	89481.3	0.56669	0.788259	1	1	1	0.0002	SCER	NA	NA	NA	REPS_DISAGREE	0.0002	SCER	NA	0.0002	SPAR	NA	0.000334064	NA	0.000243994	0.000633882
Scer_12.118	Spar_12.102	NA	NA	NA	1307	1307	90920	80956	110274	112271	-0.278419	-0.471773	73594	96648	70569.9	91846.1	0.0605334	0.0735209	26858	17595	41640.8	21650.3	-0.632627	-0.299209	51366	41944	55563.4	56598.6	-0.11332	-0.432292	1	1	1	0.0002	SPAR	NA	NA	NA	REPS_DISAGREE	0.0002	SCER	NA	NA	NA	REPS_DISAGREE	0.000334064	NA	0.000243994	NA
Scer_12.122	Spar_12.105	YLR032W	S000004022	RAD5	2739	2742	21548	23551	15691.6	17812.2	0.459112	0.404484	12867	13217	8103.34	10024.4	0.6686	0.400426	8928	4758	4753.04	2306.25	0.910923	1.04606	7836	7434	4541.19	6245.17	0.788492	0.25294	1	1	1	0.0002	SCER	NA	0.0002	SCER	NA	NA	NA	REPS_DISAGREE	0.0002	SPAR	NA	0.000334064	0.000685507	NA	0.000633882
Scer_12.123	Spar_12.106	YLR033W	S000004023	RSC58	1092	1083	28907	38013	30856.6	40557	-0.106098	-0.105396	22256	26576	21011	32630.8	0.0711051	-0.308039	8116	7909	8184.95	8068.86	-0.0241436	-0.0408049	8436	6956	13341.9	12923.7	-0.673208	-0.905528	1	1	1	0.0366	SPAR	NA	0.472	SCER	NA	NA	NA	REPS_DISAGREE	0.7328	SPAR	NA	0.0471763	0.571279	NA	0.87198
Scer_12.124	Spar_12.107	YLR034C	S000004024	SMF3	1095	1095	30931	39797	36779.8	39037.5	-0.249853	0.0277972	24481	39650	32917.5	38123.1	-0.427175	0.0566556	9582	5763	13295	9715.89	-0.472443	-0.753424	19963	17052	16673.1	20225.6	0.259793	-0.246228	1	1	1	NA	NA	REPS_DISAGREE	0.0028	SPAR	NA	NA	NA	REPS_DISAGREE	0.0002	SCER	NA	NA	0.00685507	NA	0.000633882
Scer_12.125	Spar_12.108	YLR035C	S000004025	MLH2	1767	1764	7626	8715	7354.37	9157.69	0.0498658	-0.073926	7450	10505	5028.65	6199.97	0.564525	0.758197	999	1129	1173.89	890.044	-0.234977	0.340303	1812	1988	1513.02	1222.34	0.257544	0.698762	1	0	0	NA	NA	REPS_DISAGREE	NA	NA	LOW_COV	0.0002	SCER	NA	NA	NA	LOW_COV	NA	NA	0.000243994	NA
Scer_12.138	Spar_12.117	YLR040C	S000004030	NA	675	675	1316	457	3471.38	2876.23	-1.39867	-2.65126	51421	86540	2780.22	2863.37	4.2086	4.91709	990	366	2983.13	2478.62	-1.59035	-2.75626	127251	112181	3429.37	3167	5.21318	5.14612	1	0	0	0.0002	SPAR	NA	NA	NA	LOW_COV	0.0002	SCER	NA	NA	NA	LOW_COV	0.000334064	NA	0.000243994	NA
Scer_12.139	Spar_12.118	YLR042C	S000004032	NA	486	486	1019	706	826.189	127.038	0.30228	2.46513	4172	7491	3494.76	3866.5	0.255478	0.95395	552	0	345.914	0	0.672701	0	8027	6553	2703.8	3586.54	1.56952	0.869379	0	0	0	NA	NA	NA	NA	NA	NA	NA	NA	NA	NA	NA	NA	NA	NA	NA	NA
Scer_12.140	Spar_12.119	YLR043C	S000004033	TRX1	129	129	41822	31808	39758.2	24357.6	0.0730063	0.385001	33081	61403	11146	20595	1.56939	1.57597	23535	13055	28380.1	18271.6	-0.270061	-0.484969	28746	31219	14142.1	15440.9	1.02331	1.01562	1	1	1	0.54	SCER	NA	0.019	SPAR	NA	0.0002	SCER	NA	0.2126	SPAR	NA	0.581283	0.0366816	0.000243994	0.337107
Scer_12.141	Spar_12.120	NA	NA	NA	144	166	824802	682225	794734	625048	0.258689	0.331395	384845	768224	471995	533832	-0.0893781	0.730255	687264	352414	554349	338156	0.515183	0.264696	605909	920822	1.00199e+06	862445	-0.52058	0.299604	1	1	1	0.0052	SCER	NA	NA	NA	REPS_DISAGREE	NA	NA	REPS_DISAGREE	0.1634	SPAR	NA	0.00740504	NA	NA	0.271059
Scer_12.142	Spar_12.121	YLR045C	S000004035	STU2	1986	1986	31177	29315	36113.3	38601.8	-0.212041	-0.397018	19236	25412	26425.9	37837.1	-0.458126	-0.574272	10041	6814	12987.4	7926.73	-0.371179	-0.218194	11903	14745	16128.9	18786.8	-0.438292	-0.349474	1	1	1	0.0002	SPAR	NA	NA	NA	REPS_DISAGREE	0.0036	SPAR	NA	0.0002	SCER	NA	0.000334064	NA	0.00411831	0.000633882
Scer_12.143	Spar_12.122	YLR046C	S000004036	NA	744	852	20481	12698	51422.1	32748.1	-1.13251	-1.17119	5147	6147	75651.4	112146	-3.68175	-3.99357	0	56	12444.8	7181.84	-13.4078	-6.7819	200	1	25473.8	33643	-6.79018	-13.8425	1	1	1	0.0002	SPAR	NA	0.0002	SPAR	NA	0.0002	SPAR	NA	NA	NA	REPS_DISAGREE	0.000334064	0.000685507	0.000243994	NA
Scer_12.144	Spar_12.123	YLR047C	S000004037	FRE8	1709	1709	9697	9888	10783.1	15064	-0.153148	-0.607302	5825	6445	6494.11	5975.81	-0.156848	0.109029	838	1869	550.639	592.69	0.604947	1.65526	2000	1363	1111.82	1597.68	0.846496	-0.229037	1	0	0	0.0002	SPAR	NA	NA	NA	LOW_COV	NA	NA	REPS_DISAGREE	NA	NA	LOW_COV	0.000334064	NA	NA	NA
Scer_12.146	Spar_12.125	YLR049C	S000004039	NA	946	931	17023	19698	13016.7	16340.3	0.364037	0.246539	21866	28382	14045.7	20059.1	0.615461	0.477641	4549	4594	4660.26	2859.63	-0.0579126	0.660673	8899	9769	8087.93	7049.23	0.114797	0.44763	1	1	1	0.0002	SCER	NA	NA	NA	REPS_DISAGREE	0.0002	SCER	NA	0.0002	SPAR	NA	0.000334064	NA	0.000243994	0.000633882
Scer_12.147	Spar_12.126	YLR050C	S000004040	NA	392	392	9459	8034	11344.5	11968.4	-0.262205	-0.574982	8060	13294	17387.2	23342.4	-1.10908	-0.812132	5127	7078	5995.51	7609.22	-0.225727	-0.104392	10401	8805	16013.7	12121.3	-0.622534	-0.461101	1	1	1	0.0002	SPAR	NA	0.7196	SCER	NA	0.0002	SPAR	NA	0.0002	SCER	NA	0.000334064	0.789723	0.000243994	0.000633882
Scer_12.148	Spar_12.127	YLR051C	S000004041	FCF2	524	524	29256	24104	26186.1	26903.4	0.159924	-0.158508	14496	18534	18135.5	33402.9	-0.323143	-0.849763	12740	8247	9382.04	6530.68	0.441351	0.33659	6211	7520	10770.4	10384.7	-0.794075	-0.465604	1	1	1	NA	NA	REPS_DISAGREE	0.001	SCER	NA	0.0002	SPAR	NA	0.925	SPAR	NA	NA	0.00279882	0.000243994	0.986911
Scer_12.149	Spar_12.128	YLR052W	S000004042	IES3	523	523	14513	25224	11335.6	15161.2	0.356463	0.734371	12222	19182	8165.7	11840	0.581772	0.696041	5474	3589	2946.83	1925.24	0.893208	0.898199	4424	6098	3606.49	2833.37	0.294681	1.10555	1	1	1	0.0002	SCER	NA	0.261	SCER	NA	NA	NA	REPS_DISAGREE	0.0002	SPAR	NA	0.000334064	0.353329	NA	0.000633882
Scer_12.150	Spar_12.129	YLR053C	S000004043	NA	327	327	29	351	360.032	932.939	-3.58909	-1.40775	139	195	402.742	1204.95	-1.52801	-2.62125	0	0	121.02	0	-6.93097	0	0	55	164.319	383.26	-7.36911	-2.77858	0	0	0	NA	NA	NA	NA	NA	NA	NA	NA	NA	NA	NA	NA	NA	NA	NA	NA
Scer_12.152	Spar_12.131	YLR055C	S000004045	SPT8	1463	1418	30027	29420	26765.4	27052.2	0.120816	0.0759724	21587	24815	12789	20306.4	0.71014	0.244192	14109	10038	6702.47	5152.78	1.02867	0.916841	18393	21502	5774.65	6166.35	1.62611	1.75674	1	1	1	0.1032	SCER	NA	0.0002	SCER	NA	0.0002	SCER	NA	0.0032	SCER	NA	0.124808	0.000685507	0.000243994	0.00801935
Scer_12.153	Spar_12.132	YLR056W	S000004046	ERG3	764	764	160353	165029	90769.7	95356.3	0.820961	0.791314	112611	174189	84534.3	107572	0.413735	0.695342	90826	60603	65843.7	41680.9	0.464054	0.539993	130233	103454	99769.6	118471	0.384419	-0.195543	1	1	1	0.0002	SCER	NA	0.002	SPAR	NA	0.0004	SPAR	NA	0.0002	SPAR	NA	0.000334064	0.00510799	0.000478845	0.000633882
Scer_12.154	Spar_12.133	YLR057W	S000004047	MNL2	2081	2081	28395	32303	29894.6	36583.1	-0.0742434	-0.179504	16802	22933	18638.7	25608.9	-0.149662	-0.159213	4960	4972	3876.66	4625.61	0.355445	0.104162	4474	4059	6116.1	6826.53	-0.45096	-0.749883	1	1	1	0.0044	SPAR	NA	0.0016	SCER	NA	NA	NA	REPS_DISAGREE	0.5964	SPAR	NA	0.00630937	0.00418584	NA	0.759207
Scer_12.155	Spar_12.134	YLR058C	S000004048	SHM2	556	556	98325	83533	108112	99661.7	-0.136892	-0.25469	80766	127348	24594.1	27429.6	1.71539	2.21493	89077	91567	113388	100989	-0.348143	-0.1413	262605	300778	72825.5	56068.1	1.85036	2.42343	1	1	1	0.0002	SPAR	NA	NA	NA	REPS_DISAGREE	0.0002	SCER	NA	0.1006	SCER	NA	0.000334064	NA	0.000243994	0.179244
Scer_12.156	Spar_12.135	YLR059C	S000004049	REX2	659	659	16581	14139	15497.2	17222.6	0.0975132	-0.284608	11470	16385	12281.5	15813.8	-0.0986095	0.0511862	11332	5828	10441	7969.07	0.118137	-0.451343	12614	11227	15347.9	12722.6	-0.282992	-0.18041	1	1	1	NA	NA	REPS_DISAGREE	NA	NA	REPS_DISAGREE	NA	NA	REPS_DISAGREE	0.448	SPAR	NA	NA	NA	NA	0.610168
Scer_12.157	Spar_12.136	YLR060W	S000004050	FRS1	1146	1146	167539	163930	153990	169040	0.121664	-0.0442807	89879	111475	99317.9	134104	-0.144069	-0.266635	111163	64903	105349	72453.4	0.077506	-0.158766	119396	116445	146703	145022	-0.297143	-0.316619	1	1	1	NA	NA	REPS_DISAGREE	0.4054	SPAR	NA	0.0002	SPAR	NA	0.1636	SPAR	NA	NA	0.505664	0.000243994	0.271224
Scer_12.159	Spar_12.138	YLR063W	S000004053	NA	982	880	13629	17059	10465.7	15305.2	0.222756	-0.00171395	7337	9955	8329.4	9890.4	-0.341218	-0.148828	7128	4617	4344.6	5794.86	0.555924	-0.485974	5476	3289	5932.57	5567.9	-0.273735	-0.917524	1	1	1	NA	NA	REPS_DISAGREE	NA	NA	REPS_DISAGREE	0.0002	SPAR	NA	0.8544	SPAR	NA	NA	NA	0.000243994	0.954293
Scer_12.160	Spar_12.139	YLR064W	S000004054	PER33	528	528	25167	26970	32226.3	33055.8	-0.356694	-0.293538	14126	18549	24664.3	32271.8	-0.804026	-0.798899	10386	7440	6968.71	3061.23	0.575609	1.28092	10694	7417	11592	11200.9	-0.116316	-0.594636	1	1	1	0.0002	SPAR	NA	0.0002	SCER	NA	0.0002	SPAR	NA	0.0812	SPAR	NA	0.000334064	0.000685507	0.000243994	0.148508
Scer_12.161	Spar_12.140	YLR065C	S000004055	ENV10	351	351	19035	19012	14542.1	13748.9	0.388394	0.467561	16581	29542	10354.4	15894.6	0.679239	0.894193	7147	2770	4936.59	2175.21	0.533733	0.348586	9184	7798	4607.35	5954.08	0.995031	0.389169	1	1	1	0.0002	SCER	NA	NA	NA	REPS_DISAGREE	0.0002	SCER	NA	0.294	SPAR	NA	0.000334064	NA	0.000243994	0.441
Scer_12.162	Spar_12.141	YLR066W	S000004056	SPC3	459	459	24263	25180	20216.3	25546.6	0.263224	-0.0208545	19567	34961	14877.2	26180	0.395296	0.417266	8647	6096	10414.7	4173.02	-0.268327	0.54666	13184	11246	9402.49	12704.7	0.48763	-0.175936	1	1	1	NA	NA	REPS_DISAGREE	NA	NA	REPS_DISAGREE	0.0006	SCER	NA	0.5848	SPAR	NA	NA	NA	0.000712427	0.747269
Scer_12.163	Spar_12.142	YLR067C	S000004057	PET309	2136	2136	16248	17648	15311.8	17184.9	0.0856153	0.0383586	6307	6950	10758	14566.8	-0.770287	-1.06749	2623	511	3181.81	1314.4	-0.278531	-1.36129	1388	1393	2430.65	3027.29	-0.807887	-1.11927	1	0	0	0.4344	SCER	NA	NA	NA	LOW_COV	0.0002	SPAR	NA	NA	NA	LOW_COV	0.479083	NA	0.000243994	NA
Scer_12.164	Spar_12.143	YLR068W	S000004058	FYV7	359	359	14164	14206	15162	15828.2	-0.0982254	-0.155986	6327	7350	6947.95	15585.4	-0.135046	-1.08427	6071	4685	8431.03	5054	-0.473708	-0.109353	3027	3812	4837.82	6050.42	-0.67629	-0.666346	1	1	1	0.0116	SPAR	NA	NA	NA	REPS_DISAGREE	NA	NA	REPS_DISAGREE	0.0534	SCER	NA	0.0158186	NA	NA	0.1021
Scer_12.165	Spar_12.144	YLR069C	S000004059	MEF1	1571	1571	46084	47789	38316.1	35175.8	0.266308	0.442086	14023	19003	27148.3	35701.1	-0.953016	-0.909707	22411	11687	14596	10050.5	0.618603	0.217612	10524	11157	21056.4	24212.1	-1.0005	-1.11771	1	1	1	0.0002	SCER	NA	NA	NA	REPS_DISAGREE	0.0002	SPAR	NA	0.0002	SPAR	NA	0.000334064	NA	0.000243994	0.000633882
Scer_12.167	Spar_12.146	YLR071C	S000004061	RGR1	2202	2202	31308	42415	31540	43134.5	-0.0106506	-0.0242678	16435	19450	21285.6	24276	-0.373084	-0.319744	8177	5840	7281.34	4562.1	0.167346	0.3562	9788	6681	9690.58	10460.2	0.0144297	-0.646696	1	1	1	0.6554	SPAR	NA	0.0046	SCER	NA	0.0002	SPAR	NA	NA	NA	REPS_DISAGREE	0.695259	0.0106137	0.000243994	NA
Scer_12.168	Spar_12.147	YLR072W	S000004062	NA	1709	1685	17136	17038	15209.6	15141.4	0.151632	0.149843	13910	20214	9973.28	13192.6	0.459538	0.595179	6665	5673	4978.95	2893.9	0.400288	0.950448	7545	9055	6604.79	5906.54	0.171578	0.595914	1	1	1	0.0062	SCER	NA	0.001	SCER	NA	0.0002	SCER	NA	0.0448	SPAR	NA	0.00875089	0.00279882	0.000243994	0.0877116
Scer_12.169	Spar_12.148	YLR073C	S000004063	RFU1	493	484	22852	21073	18236.7	18291.6	0.298882	0.177627	9352	14202	11009.2	15368.1	-0.261914	-0.140416	6185	4386	5520.51	5196.12	0.137364	-0.271059	4379	3342	5123.78	6646.78	-0.25314	-1.01831	1	1	1	0.0024	SCER	NA	0.0996	SPAR	NA	0.0002	SPAR	NA	1	SPAR	NA	0.00352953	0.157878	0.000243994	1
Scer_12.170	Spar_12.149	YLR074C	S000004064	BUD20	341	347	31057	21278	29580.1	24842	0.0954508	-0.198244	16104	28359	23439.6	41577.3	-0.516336	-0.52681	28773	16898	29312.9	17285.8	-0.00165755	-0.00756887	15047	18886	25475.9	22490.1	-0.734455	-0.226799	1	1	1	NA	NA	REPS_DISAGREE	NA	NA	REPS_DISAGREE	0.0002	SPAR	NA	NA	NA	REPS_DISAGREE	NA	NA	0.000243994	NA
Scer_12.171	Spar_12.150	YLR075W	S000004065	RPL10	168	168	482717	411336	516362	430341	-0.0972057	-0.0651621	275323	440738	315134	485413	-0.19484	-0.139291	319139	230161	333352	218282	-0.0628627	0.0764468	292845	262171	310952	307471	-0.086555	-0.229943	1	1	1	0.3052	SPAR	NA	0.7994	SCER	NA	0.207	SPAR	NA	NA	NA	REPS_DISAGREE	0.346288	0.85508	0.213186	NA
Scer_12.172	Spar_12.151	YLR077W	S000004067	FMP25	1462	1462	23787	25552	23211.6	25481.1	0.0353228	0.00400646	20215	27957	11912.5	14886.3	0.7629	0.909181	3883	3440	4704.63	3574.29	-0.276846	-0.055231	5902	5383	4556.13	4945.26	0.373323	0.122341	1	1	1	0.9326	SCER	NA	0.5464	SPAR	NA	0.0002	SCER	NA	0.0002	SPAR	NA	0.943091	0.638141	0.000243994	0.000633882
Scer_12.174	Spar_12.153	YLR079W	S000004069	SIC1	721	703	23303	26524	27418	28077.5	-0.271072	-0.118587	30476	46723	21897	33683.7	0.440444	0.435595	6008	6522	7547.58	5565.04	-0.365556	0.192409	9471	13641	11402.1	9889.27	-0.304155	0.427499	1	1	1	0.0142	SPAR	NA	NA	NA	REPS_DISAGREE	0.0002	SCER	NA	NA	NA	REPS_DISAGREE	0.0191629	NA	0.000243994	NA
Scer_12.175	Spar_12.154	YLR080W	S000004070	EMP46	1200	1128	1234	2298	2847.53	2374.03	-1.29497	-0.136207	3685	5590	1229.01	1691.92	1.49412	1.63433	196	455	696.871	0	-1.91403	8.74362	1374	1883	373.453	492.524	1.78731	1.84334	1	0	0	0.3314	SPAR	NA	NA	NA	LOW_COV	0.0002	SCER	NA	NA	NA	LOW_COV	0.373958	NA	0.000243994	NA
Scer_12.176	Spar_12.155	NA	NA	NA	1377	1339	395	776	32.7302	14.8873	3.51302	5.57159	352	504	283.219	263.664	0.272294	0.891749	134	0	3.02549	1.00798	5.02728	-1.04612	96	196	91.7628	71.7309	0.0240657	1.39718	0	0	0	NA	NA	NA	NA	NA	NA	NA	NA	NA	NA	NA	NA	NA	NA	NA	NA
Scer_12.177	Spar_12.156	YLR082C	S000004072	SRL2	932	932	7099	10497	10508.4	9687.68	-0.565785	0.115743	8564	10812	4508.11	7673.74	0.925609	0.494578	2097	2508	1595.44	2507.85	0.394156	8.81e-05	2430	2293	1201.45	1947.16	1.01557	0.235754	1	1	1	NA	NA	REPS_DISAGREE	NA	NA	REPS_DISAGREE	0.0002	SCER	NA	NA	NA	REPS_DISAGREE	NA	NA	0.000243994	NA
Scer_12.178	Spar_12.157	NA	NA	NA	1583	1571	79274	73374	107977	96209.8	-0.456776	-0.401888	42704	54279	47986.1	48606.9	-0.179219	0.148251	51489	29721	67710.4	36295.2	-0.406085	-0.299267	64776	45927	46942	54488.8	0.453593	-0.257589	1	1	1	0.0002	SPAR	NA	0.3756	SCER	NA	0.0002	SCER	NA	0.0276	SCER	NA	0.000334064	0.474516	0.000243994	0.0565433
Scer_12.179	Spar_12.158	YLR084C	S000004074	RAX2	3082	3082	20243	21920	33795.4	35635.3	-0.739375	-0.701033	14945	17512	18542.6	23464.4	-0.311161	-0.422107	11914	9207	16134.9	11159.3	-0.437498	-0.277418	16173	15413	17496.8	21746.1	-0.113499	-0.496584	1	1	1	0.0002	SPAR	NA	0.0002	SCER	NA	0.0002	SCER	NA	0.0002	SCER	NA	0.000334064	0.000685507	0.000243994	0.000633882
Scer_12.180	Spar_12.159	YLR085C	S000004075	ARP6	884	884	11968	14279	11611.3	9807.77	0.0436514	0.541852	7406	11712	8667.18	12489.3	-0.22684	-0.0926922	3704	3075	3775.81	2493.74	-0.0276944	0.302169	3993	4822	5189.93	5012.82	-0.37816	-0.0559794	1	1	1	0.1844	SCER	NA	0.326	SPAR	NA	0.0002	SPAR	NA	0.3034	SPAR	NA	0.216295	0.423621	0.000243994	0.45258
Scer_12.181	Spar_12.160	YLR086W	S000004076	SMC4	3904	3904	27758	35643	36386	45862.9	-0.390469	-0.363699	13757	14634	19471.9	25249.9	-0.501199	-0.786912	8038	4608	6486.65	6334.13	0.309321	-0.45892	8869	8574	10565.5	10902.7	-0.252495	-0.346606	1	1	1	0.0002	SPAR	NA	NA	NA	REPS_DISAGREE	0.0002	SPAR	NA	0.0022	SCER	NA	0.000334064	NA	0.000243994	0.00570983
Scer_12.182	Spar_12.161	YLR087C	S000004077	CSF1	6682	6682	17311	20194	18250.5	23565.6	-0.0762464	-0.222748	7709	7582	6980.86	7902.19	0.143119	-0.0596661	2339	1126	2503.09	1099.7	-0.0977763	0.0340624	3798	2012	3427.23	4059.05	0.148154	-1.01215	1	0	0	0.0024	SPAR	NA	NA	NA	LOW_COV	0.0046	SCER	NA	NA	NA	LOW_COV	0.00352953	NA	0.00521175	NA
Scer_12.183	Spar_12.162	YLR088W	S000004078	GAA1	1402	1402	28147	33461	26710.8	28430.8	0.0755551	0.235018	21852	25558	15705.2	23906.7	0.476496	0.0963576	10306	5691	9302.37	4979.41	0.147799	0.192672	18424	12453	10221.9	11329.3	0.849853	0.136422	1	1	1	0.0024	SCER	NA	NA	NA	REPS_DISAGREE	NA	NA	REPS_DISAGREE	NA	NA	REPS_DISAGREE	0.00352953	NA	NA	NA
Scer_12.184	Spar_12.163	NA	NA	NA	1059	1059	46936	51606	39356.6	45990.9	0.254085	0.166187	31341	49606	21112.3	26214.4	0.569942	0.92013	25574	17036	21003.9	16467.3	0.284005	0.0489779	34455	30969	35650.9	31000.7	-0.0492244	-0.00147421	1	1	1	0.0004	SCER	NA	NA	NA	REPS_DISAGREE	0.0002	SCER	NA	0.0002	SPAR	NA	0.000643008	NA	0.000243994	0.000633882
Scer_12.185	Spar_12.164	YLR090W	S000004080	XDJ1	1122	1122	20554	23646	20868	18436.5	-0.02187	0.359018	14305	19240	11761.8	19396.9	0.282389	-0.0117171	9703	5226	8671.05	3718.43	0.162207	0.490903	7894	10211	6784.05	5814.79	0.218581	0.812219	1	1	1	NA	NA	REPS_DISAGREE	0.1758	SCER	NA	NA	NA	REPS_DISAGREE	NA	NA	REPS_DISAGREE	NA	0.253826	NA	NA
Scer_12.186	Spar_12.165	YLR091W	S000004081	GEP5	732	729	5267	5669	3671.73	4399.7	0.514477	0.359691	4690	8085	3189.02	3231.82	0.550403	1.31671	1336	1097	1156.75	1171.27	0.201757	-0.100351	2440	1784	2189.5	1716.54	0.150285	0.0496586	1	0	0	0.0002	SCER	NA	NA	NA	LOW_COV	0.001	SCER	NA	NA	NA	LOW_COV	0.000334064	NA	0.00117465	NA
Scer_12.187	Spar_12.166	NA	NA	NA	2072	2072	1696	2126	3278.97	6897.79	-0.950696	-1.69752	1425	2453	1551.21	1910.92	-0.122347	0.360114	196	406	0	350.776	7.62205	0.210372	290	289	64.0206	60.4708	2.16205	2.23808	1	0	0	0.0002	SPAR	NA	NA	NA	LOW_COV	NA	NA	LOW_COV	NA	NA	LOW_COV	0.000334064	NA	NA	NA
Scer_12.189	Spar_12.168	YLR094C	S000004084	GIS3	1098	1101	19919	29105	26875.4	31708	-0.428188	-0.11964	12819	18563	22225.3	21684	-0.789935	-0.220253	7044	6195	13386.8	5046.94	-0.922308	0.299579	10431	10601	18773	15908.4	-0.843781	-0.581607	1	1	1	0.0146	SPAR	NA	NA	NA	REPS_DISAGREE	NA	NA	REPS_DISAGREE	NA	NA	REPS_DISAGREE	0.0196648	NA	NA	NA
Scer_12.190	Spar_12.169	YLR095C	S000004085	IOC2	2201	2231	41895	50945	46601.8	52490.7	-0.134074	-0.0235892	29046	35057	26792.3	32026.2	0.136048	0.14998	16210	10468	15951.4	12488.8	0.0427325	-0.235099	18744	17164	18600.1	18902.8	0.0306487	-0.119671	1	1	1	0.4676	SPAR	NA	NA	NA	REPS_DISAGREE	0.0002	SCER	NA	0.611	SPAR	NA	0.511734	NA	0.000243994	0.770398
Scer_12.191	Spar_12.170	NA	NA	NA	2869	2911	45601	55690	51723.6	56295.9	-0.160787	0.00535553	19719	23417	27305.1	32347.4	-0.448594	-0.445108	14754	9528	11920.4	8694.81	0.328614	0.152971	14989	13225	20849.4	20101.3	-0.455105	-0.583019	1	1	1	NA	NA	REPS_DISAGREE	0.0504	SCER	NA	0.0002	SPAR	NA	0.6802	SPAR	NA	NA	0.0870679	0.000243994	0.832557
Scer_12.192	Spar_12.171	YLR097C	S000004087	HRT3	856	856	13317	13914	9080.15	11399.7	0.552431	0.287516	12313	15782	5079.75	8192.48	1.27719	0.945824	1805	2372	1959.51	695.504	-0.11843	1.76851	2337	3202	1064.88	1872.09	1.13324	0.774002	1	1	1	0.0002	SCER	NA	NA	NA	REPS_DISAGREE	0.0002	SCER	NA	0.0164	SPAR	NA	0.000334064	NA	0.000243994	0.0358326
Scer_12.193	Spar_12.172	YLR098C	S000004088	CHA4	1369	1366	12548	12100	11132.2	13604	0.169535	-0.172179	8925	11825	6587.65	7088.87	0.434866	0.734967	1737	2211	2071.45	1215.62	-0.257075	0.859307	2581	3134	1323.09	1681.92	0.960321	0.894332	1	1	1	NA	NA	REPS_DISAGREE	NA	NA	REPS_DISAGREE	0.0002	SCER	NA	0.8402	SPAR	NA	NA	NA	0.000243994	0.947467
Scer_12.194	Spar_12.173	YLR099C	S000004089	ICT1	1020	1020	42736	40756	48377.2	49976.7	-0.178871	-0.294238	41255	64013	43601.8	55735.3	-0.0798174	0.19977	3490	2249	3656.81	4000.66	-0.0673385	-0.830674	9563	8565	27236.5	22382.9	-1.50991	-1.38577	1	1	1	0.0002	SPAR	NA	NA	NA	REPS_DISAGREE	0.0002	SCER	NA	0.9632	SPAR	NA	0.000334064	NA	0.000243994	1
Scer_12.195	Spar_12.174	YLR099W-A	S000007618	MIM2	230	242	7380	8533	15530	8053.05	-0.999887	0.156881	7777	16871	8241.06	13901.2	-0.010232	0.352692	3718	2339	7113.93	5421.91	-0.862562	-1.13919	5527	6644	5168.59	3689.14	0.17008	0.921969	1	1	1	NA	NA	REPS_DISAGREE	NA	NA	REPS_DISAGREE	NA	NA	REPS_DISAGREE	0.0018	SCER	NA	NA	NA	NA	0.00474481
Scer_12.196	Spar_12.175	YLR100W	S000004090	ERG27	751	754	75796	72920	42031.5	41273.6	0.856387	0.826832	53026	78064	45614.7	70319.3	0.22295	0.156487	34868	23206	20840.6	16015.7	0.748233	0.54073	38719	43656	36434.1	36461.4	0.0935015	0.265556	1	1	1	0.0002	SCER	NA	0.1056	SPAR	NA	0.0002	SPAR	NA	0.0002	SPAR	NA	0.000334064	0.165175	0.000243994	0.000633882
Scer_12.197	Spar_12.176	YLR102C	S000004092	APC9	633	633	7157	7668	4399.73	8040.15	0.701814	-0.0683625	7972	12953	4190.25	7055.37	0.927742	0.876399	2296	1802	1292.89	1124.9	0.828034	0.679318	3900	3929	1698.68	1840.4	1.19858	1.09373	1	0	0	NA	NA	REPS_DISAGREE	NA	NA	LOW_COV	0.0002	SCER	NA	NA	NA	LOW_COV	NA	NA	0.000243994	NA
Scer_12.198	Spar_12.177	YLR103C	S000004093	CDC45	1235	1241	17645	19224	20330.4	24109.5	-0.197376	-0.319687	10721	12243	14532.5	20924.8	-0.431816	-0.766215	4204	2352	4160.05	2555.22	0.0221515	-0.11252	4493	3267	4349.13	6686.4	0.0539336	-1.02605	1	1	1	0.0002	SPAR	NA	0.1834	SCER	NA	0.0002	SPAR	NA	NA	NA	REPS_DISAGREE	0.000334064	0.263672	0.000243994	NA
Scer_12.199	Spar_12.178	YLR104W	S000004094	LCL2	334	361	13465	8941	20067.6	14771.2	-0.463466	-0.612064	8949	16171	12812.4	19706.1	-0.405543	-0.173066	6218	3640	7631.29	4828.21	-0.183283	-0.295302	6204	5902	9641.5	10218.3	-0.523825	-0.679627	1	1	1	0.0002	SPAR	NA	0.0112	SCER	NA	0.0066	SCER	NA	0.932	SPAR	NA	0.000334064	0.0231741	0.00740659	0.989918
Scer_12.200	Spar_12.179	YLR105C	S000004095	SEN2	914	914	16003	15079	21630.7	27970.3	-0.434713	-0.891311	11655	15774	16521.1	24948.4	-0.503323	-0.661368	2695	2581	3724.38	5940.01	-0.466566	-1.20222	3256	3060	5322.24	5529.53	-0.708762	-0.853415	1	1	1	0.0002	SPAR	NA	0.6896	SPAR	NA	NA	NA	REPS_DISAGREE	0.0002	SCER	NA	0.000334064	0.766402	NA	0.000633882
Scer_12.201	Spar_12.180	YLR106C	S000004096	MDN1	12091	12097	127719	167964	121750	170176	0.0697628	-0.0181593	43715	46682	46112.7	66397.8	-0.0763175	-0.507544	40897	28647	54660.5	38539	-0.417779	-0.427206	68279	42480	85017.2	110783	-0.315592	-1.38215	1	1	1	NA	NA	REPS_DISAGREE	0.0002	SPAR	NA	0.0006	SPAR	NA	NA	NA	REPS_DISAGREE	NA	0.000685507	0.000712427	NA
Scer_12.202	Spar_12.181	YLR107W	S000004097	REX3	1097	1097	12081	14821	11790.8	12996.6	0.0350754	0.189492	8871	12579	11091.4	15799.2	-0.322244	-0.328813	2960	365	2229.78	1516	0.408533	-2.0513	2539	2675	1694.41	2031.82	0.583194	0.396597	1	0	0	0.3322	SCER	NA	NA	NA	LOW_COV	0.0002	SPAR	NA	NA	NA	LOW_COV	0.374499	NA	0.000243994	NA
Scer_12.204	Spar_12.184	YLR108C	S000004098	NA	1244	1244	60244	57559	63989.5	62524.8	-0.0870159	-0.119384	15448	22508	50190.3	60270.8	-1.69992	-1.42098	12625	8894	16692.6	9761.25	-0.4029	-0.134219	4893	3685	21485.3	16938.5	-2.13433	-2.20026	1	1	1	0.0004	SPAR	NA	0.888	SPAR	NA	0.0002	SPAR	NA	0.0074	SPAR	NA	0.000643008	0.922319	0.000243994	0.0173202
Scer_12.205	Spar_12.185	YLR109W	S000004099	AHP1	320	320	908240	709752	769193	605258	0.239728	0.229765	471393	890486	642249	1.03613e+06	-0.446202	-0.218546	983909	847282	716783	548033	0.456989	0.628578	794850	1030518	1.11101e+06	962564	-0.48312	0.0984158	1	1	1	0.0004	SCER	NA	0.0304	SCER	NA	0.0002	SPAR	NA	0.4686	SPAR	NA	0.000643008	0.055604	0.000243994	0.632469
Scer_12.209	Spar_12.189	YLR113W	S000004103	HOG1	967	967	55424	61426	30829.8	34146.5	0.846162	0.847091	56440	79936	22751.9	33170.1	1.31069	1.26894	23561	16236	15582.3	9491.11	0.596464	0.774484	30037	28227	17375.2	17608.3	0.789678	0.680793	1	1	1	0.0002	SCER	NA	0.3614	SPAR	NA	0.0002	SCER	NA	0.0002	SPAR	NA	0.000334064	0.461507	0.000243994	0.000633882
Scer_12.211	Spar_12.193	YLR114C	S000004104	AVL9	1749	1660	36992	45221	40410.9	43017.4	-0.202874	-0.00327631	25549	24968	21869.3	31215.4	0.149001	-0.397513	8017	6956	7376.14	4631.65	0.0448337	0.511279	10800	8747	8352.55	7780.71	0.295357	0.0935182	1	1	1	0.9296	SPAR	NA	0.0002	SCER	NA	NA	NA	REPS_DISAGREE	NA	NA	REPS_DISAGREE	0.940871	0.000685507	NA	NA
Scer_12.212	Spar_12.194	YLR115W	S000004105	CFT2	1892	1904	22613	31105	23701.6	25962.5	-0.0587083	0.26983	13473	14844	17337.8	24222.7	-0.354707	-0.697322	5164	3780	4873.05	6355.3	0.0927678	-0.740297	5055	4235	8638.51	9039.34	-0.763831	-1.08455	1	1	1	NA	NA	REPS_DISAGREE	NA	NA	REPS_DISAGREE	0.0002	SPAR	NA	NA	NA	REPS_DISAGREE	NA	NA	0.000243994	NA
Scer_12.213	Spar_12.195	YLR116W	S000004106	MSL5	1176	1176	18214	20068	16389.9	20399.6	0.152233	-0.0236427	9090	15971	9047.41	10811.1	0.00677516	0.562901	7593	4545	10529.7	6055.93	-0.47167	-0.413988	6847	8642	10676.5	11259.7	-0.640819	-0.381687	1	1	1	NA	NA	REPS_DISAGREE	0.0002	SPAR	NA	NA	NA	REPS_DISAGREE	0.9426	SPAR	NA	NA	0.000685507	NA	0.99388
Scer_12.214	Spar_12.196	YLR117C	S000004107	CLF1	1706	1706	22948	25262	19596.5	25198.3	0.227765	0.00364363	14128	18289	13456.8	17694.7	0.0702185	0.0476575	4479	5022	4059.2	2254.84	0.141949	1.15488	5394	4982	4820.75	5512.85	0.162067	-0.146046	1	1	1	0.9476	SCER	NA	NA	NA	REPS_DISAGREE	NA	NA	REPS_DISAGREE	0.0636	SPAR	NA	0.956053	NA	NA	0.119483
Scer_12.215	Spar_12.197	YLR118C	S000004108	NA	587	587	17309	14210	18817.9	16613.3	-0.120574	-0.225414	18310	28397	12969.2	18232.3	0.497514	0.639212	8317	7609	10312.9	10314.6	-0.310279	-0.438863	17854	15174	10341.5	9148.19	0.787749	0.729981	1	1	1	0.0058	SPAR	NA	0.1144	SPAR	NA	0.0002	SCER	NA	0.419	SCER	NA	0.0082194	0.176373	0.000243994	0.582449
Scer_12.217	Spar_12.199	YLR120C	S000004110	YPS1	1365	1365	21198	21858	19528	22924.5	0.118377	-0.068725	11231	18879	32406.5	31184.5	-1.52871	-0.724016	14161	10427	8945.36	5649.71	0.662652	0.883958	28468	27187	35917.7	33292.3	-0.335342	-0.292262	1	1	1	NA	NA	REPS_DISAGREE	0.0002	SCER	NA	0.0002	SPAR	NA	0.9688	SCER	NA	NA	0.000685507	0.000243994	1
Scer_12.219	Spar_12.201	YLR121C	S000004111	YPS3	1299	1299	5809	3504	3162.93	1763.65	0.876822	0.990031	4126	6556	7445.97	7735.57	-0.851559	-0.238659	3666	1490	2577.72	1135.99	0.507947	0.391061	8627	8938	11927	7682.29	-0.467258	0.218389	1	0	0	0.0002	SCER	NA	NA	NA	LOW_COV	0.0002	SPAR	NA	NA	NA	LOW_COV	0.000334064	NA	0.000243994	NA
Scer_12.223	Spar_12.206	YLR126C	S000004116	NA	722	722	11224	9195	5871.6	5515.26	0.934645	0.737317	13340	20209	3923.49	5805.76	1.76529	1.79926	2410	1795	1604.52	731.791	0.586593	1.29331	3993	4565	495.092	1334.11	3.00915	1.77397	1	0	0	0.0002	SCER	NA	NA	NA	LOW_COV	0.0002	SCER	NA	NA	NA	LOW_COV	0.000334064	NA	0.000243994	NA
Scer_12.224	Spar_12.207	YLR127C	S000004117	APC2	2050	2047	14222	18125	9663.34	12561.9	0.55537	0.526776	8762	12963	6323.48	7324.19	0.468364	0.82146	1533	889	1823.36	779.166	-0.252206	0.187911	2675	2091	2755.02	2383.38	-0.0446201	-0.190846	1	0	0	0.0002	SCER	NA	NA	NA	LOW_COV	NA	NA	REPS_DISAGREE	NA	NA	LOW_COV	0.000334064	NA	NA	NA
Scer_12.226	Spar_12.209	YLR129W	S000004119	DIP2	2160	2160	95877	89458	106326	102752	-0.149243	-0.199886	30209	34434	58625.4	86511.8	-0.956524	-1.32904	35330	20238	33992.4	23036.3	0.0556812	-0.186834	24262	23905	41030.8	47426.2	-0.757984	-0.988342	1	1	1	0.0002	SPAR	NA	0.8378	SCER	NA	0.0002	SPAR	NA	0.0002	SCER	NA	0.000334064	0.881797	0.000243994	0.000633882
Scer_12.227	Spar_12.210	YLR130C	S000004120	ZRT2	1068	1068	50310	55109	34531.3	36204	0.542926	0.606126	31250	43390	28886.6	35055.3	0.113453	0.307723	7857	4760	4918.44	2885.84	0.675669	0.721774	8703	7430	10627.4	8934.25	-0.288176	-0.265951	1	1	1	0.0002	SCER	NA	0.3136	SCER	NA	0.0002	SPAR	NA	0.0294	SPAR	NA	0.000334064	0.41135	0.000243994	0.0598214
Scer_12.228	Spar_12.211	YLR131C	S000004121	ACE2	1879	1876	30969	37908	28436.6	39023.6	0.120768	-0.04415	16047	21693	18132.1	24498.4	-0.178534	-0.177757	7473	7382	6134.68	5737.41	0.282352	0.361252	9380	9129	16481	14419.6	-0.815385	-0.661747	1	1	1	NA	NA	REPS_DISAGREE	0.0022	SCER	NA	0.0004	SPAR	NA	0.0706	SPAR	NA	NA	0.00552335	0.000478845	0.131442
Scer_12.229	Spar_12.212	YLR132C	S000004122	USB1	739	739	4945	6946	4251.95	7088.35	0.217799	-0.0292631	5966	9780	4424.1	4674.67	0.431296	1.06481	1313	623	1497.62	963.626	-0.189666	-0.628424	1881	1522	2003.84	1376.65	-0.0912231	0.144708	1	0	0	NA	NA	REPS_DISAGREE	NA	NA	LOW_COV	0.0002	SCER	NA	NA	NA	LOW_COV	NA	NA	0.000243994	NA
Scer_12.230	Spar_12.213	YLR133W	S000004123	CKI1	1347	1347	17382	21791	17116.9	21334.5	0.022172	0.0305412	14416	20597	11937.6	12083	0.272135	0.769404	7833	5643	6656.07	5057.02	0.234861	0.158145	11694	11731	8653.45	8900.88	0.434378	0.398267	1	1	1	0.5262	SCER	NA	0.3048	SCER	NA	0.0002	SCER	NA	0.844	SPAR	NA	0.568173	0.401589	0.000243994	0.949368
Scer_12.231	Spar_12.214	NA	NA	NA	682	583	21449	7850	13357.9	7342.43	0.456903	-0.129853	9929	10595	5227.85	5437.32	0.699023	0.736012	12236	4074	1450.22	421.334	2.84964	3.04407	4991	21639	1769.1	1457.14	1.26951	3.66523	1	1	1	NA	NA	REPS_DISAGREE	0.0018	SCER	NA	0.4974	SCER	NA	NA	NA	REPS_DISAGREE	NA	0.00463725	0.500829	NA
Scer_12.232	Spar_12.215	YLR135W	S000004125	SLX4	1955	1952	9346	6944	8667.55	9851.44	0.106498	-0.506721	5725	7337	6263.72	8110.89	-0.131939	-0.146866	1767	577	1235.41	2077.44	0.513748	-1.84858	2031	2402	2486.13	2189.88	-0.293798	0.131113	1	0	0	NA	NA	REPS_DISAGREE	NA	NA	LOW_COV	NA	NA	REPS_DISAGREE	NA	NA	LOW_COV	NA	NA	NA	NA
Scer_12.234	Spar_12.217	YLR137W	S000004127	RKM5	877	877	8507	12457	11264.1	12017	-0.404973	0.0518703	9569	16843	5348.24	7485.65	0.839184	1.16984	1327	494	2515.19	1370.85	-0.921985	-1.47062	3433	3690	1988.91	2144	0.78719	0.783033	1	0	0	NA	NA	REPS_DISAGREE	NA	NA	LOW_COV	0.0002	SCER	NA	NA	NA	LOW_COV	NA	NA	0.000243994	NA
Scer_12.235	Spar_12.218	YLR138W	S000004128	NHA1	2069	2069	47428	45418	49986.9	48332.2	-0.0758101	-0.0897179	29809	29872	29351.7	35403.1	0.0223045	-0.245075	5581	5353	6412.02	5145.72	-0.200221	0.0569631	10523	7195	13809.2	15685.3	-0.392055	-1.12424	1	1	1	0.0098	SPAR	NA	NA	NA	REPS_DISAGREE	NA	NA	REPS_DISAGREE	0.8478	SPAR	NA	0.0135058	NA	NA	0.950863
Scer_12.236	Spar_12.219	YLR139C	S000004129	SLS1	1565	1556	13723	16117	11822.5	17540.2	0.206719	-0.130399	5272	7944	6108.69	6369.16	-0.220795	0.310397	6019	7260	4411.16	4097.43	0.439957	0.816777	5540	5252	6901.42	6012.05	-0.325276	-0.203275	1	1	1	NA	NA	REPS_DISAGREE	0.0008	SCER	NA	NA	NA	REPS_DISAGREE	0.0018	SPAR	NA	NA	0.0023017	NA	0.00474481
Scer_12.238	Spar_12.221	YLR141W	S000004131	RRN5	671	707	6566	5164	5001.77	3415.15	0.467906	0.671794	4512	6075	3646.33	5418.42	0.382643	0.24038	1339	1793	1445.17	571.523	-0.0346116	1.72317	1548	1474	1024.33	1532.2	0.670648	0.0195621	1	0	0	0.0002	SCER	NA	NA	NA	LOW_COV	0.0008	SPAR	NA	NA	NA	LOW_COV	0.000334064	NA	0.000944419	NA
Scer_12.239	Spar_12.222	YLR142W	S000004132	PUT1	1106	1118	1206	1235	2785.04	4080.12	-1.19122	-1.70772	1895	4118	2775.89	3241.26	-0.534942	0.360862	535	448	1207.17	571.523	-1.15695	-0.335049	1187	2048	2530.95	2656.13	-1.07614	-0.359379	1	0	0	0.0002	SPAR	NA	NA	NA	LOW_COV	0.0002	SCER	NA	NA	NA	LOW_COV	0.000334064	NA	0.000243994	NA
Scer_12.241	Spar_12.226	YLR143W	S000004133	DPH6	1817	1820	25844	34019	27483.4	25278.7	-0.0863495	0.430786	14255	17565	18202.2	25409.6	-0.350244	-0.530267	8500	4494	3272.57	2671.14	1.37915	0.752706	8269	7999	4893.3	5325.18	0.759163	0.589278	1	1	1	NA	NA	REPS_DISAGREE	0.0016	SCER	NA	0.0002	SPAR	NA	NA	NA	REPS_DISAGREE	NA	0.00418584	0.000243994	NA
Scer_12.242	Spar_12.227	YLR144C	S000004134	ACF2	1869	1869	18276	20649	26373.6	30659.9	-0.529119	-0.57026	11445	14786	15991	19090.3	-0.482509	-0.368586	5321	4590	5698	5064.08	-0.098741	-0.141776	9608	9863	10860	10640.4	-0.176702	-0.109437	1	1	1	0.0002	SPAR	NA	0.0002	SCER	NA	0.0132	SCER	NA	0.0002	SCER	NA	0.000334064	0.000685507	0.0145314	0.000633882
Scer_12.243	Spar_12.228	YLR145W	S000004135	RMP1	497	497	10534	13728	13545.3	11574.4	-0.362712	0.246165	7723	10892	8739.94	15879.1	-0.17844	-0.543818	1888	1681	3015.4	2349.59	-0.675207	-0.482848	2460	2600	3023.9	3777.55	-0.297645	-0.538765	1	1	1	NA	NA	REPS_DISAGREE	0.0002	SPAR	NA	NA	NA	REPS_DISAGREE	0.0002	SCER	NA	NA	0.000685507	NA	0.000633882
Scer_12.244	Spar_12.229	YLR146C	S000004136	SPE4	655	655	16401	17390	17495.8	16785	-0.0932168	0.0510861	10004	15621	11424	18851.5	-0.191475	-0.27118	6488	4327	5731.28	5514.64	0.178886	-0.349828	4564	5176	6071.28	5722.62	-0.411624	-0.144812	1	1	1	NA	NA	REPS_DISAGREE	NA	NA	REPS_DISAGREE	0.0002	SPAR	NA	NA	NA	REPS_DISAGREE	NA	NA	0.000243994	NA
Scer_12.246	Spar_12.231	YLR147C	S000004137	SMD3	177	177	5536	8546	6189.97	7303.72	-0.161061	0.226589	3319	6059	3202.88	6421.55	0.051362	-0.083828	3317	1591	4486.8	2825.36	-0.435694	-0.828105	3314	3350	4212.55	3534.41	-0.346028	-0.0772872	1	1	1	NA	NA	REPS_DISAGREE	0.028	SPAR	NA	NA	NA	REPS_DISAGREE	0.0046	SCER	NA	NA	0.0516134	NA	0.0111442
Scer_12.247	Spar_12.232	YLR148W	S000004138	PEP3	2326	2329	21862	27119	26696.9	26281.1	-0.286376	0.0471372	14984	18922	15622.9	19768.8	-0.0583788	-0.0612967	6313	3845	4464.61	3887.77	0.501556	-0.0140946	7588	7070	3945.8	6606.33	0.945086	0.0997065	1	1	1	NA	NA	REPS_DISAGREE	NA	NA	REPS_DISAGREE	NA	NA	REPS_DISAGREE	NA	NA	REPS_DISAGREE	NA	NA	NA	NA
Scer_12.248	Spar_12.233	YLR149C	S000004139	NA	1710	1710	3410	3778	3316.66	5992.64	0.0400295	-0.665428	5761	9539	4435.36	4836.99	0.377193	0.979582	407	358	201.699	413.271	1.00923	-0.20659	1026	1589	433.206	592.614	1.24199	1.42143	1	0	0	NA	NA	REPS_DISAGREE	NA	NA	LOW_COV	0.0002	SCER	NA	NA	NA	LOW_COV	NA	NA	0.000243994	NA
Scer_12.250	Spar_12.235	YLR150W	S000004140	STM1	338	326	389041	391361	343512	335843	0.127409	0.168561	273561	440721	253389	381795	0.0583576	0.154916	551375	373322	480179	347711	0.147309	0.0503813	474608	475770	547909	494205	-0.259352	-0.106997	1	1	1	0.003	SCER	NA	NA	NA	REPS_DISAGREE	NA	NA	REPS_DISAGREE	0.3014	SPAR	NA	0.00437157	NA	NA	0.450095
Scer_12.251	Spar_12.236	YLR151C	S000004141	PCD1	878	857	3409	4220	5142.61	5549	-0.627934	-0.429829	5856	7018	8251.45	11735.2	-0.529586	-0.776553	647	433	940.927	776.142	-0.574547	-0.87541	1936	1493	2219.38	2109.8	-0.231908	-0.533539	1	0	0	0.0004	SPAR	NA	NA	NA	LOW_COV	NA	NA	REPS_DISAGREE	NA	NA	LOW_COV	0.000643008	NA	NA	NA
Scer_12.252	Spar_12.237	YLR152C	S000004142	NA	1486	1501	10892	12931	10982.5	14594.5	0.00255816	-0.160092	10415	17045	9049.14	11384.8	0.217279	0.596689	822	138	398.356	425.366	1.05771	-1.60252	1180	1132	565.515	1034.26	1.07431	0.144646	1	0	0	NA	NA	REPS_DISAGREE	NA	NA	LOW_COV	0.0002	SCER	NA	NA	NA	LOW_COV	NA	NA	0.000243994	NA
Scer_12.253	Spar_12.238	NA	NA	NA	1476	1476	151755	167448	192653	193544	-0.344257	-0.208948	69885	93282	147741	179179	-1.08	-0.941723	141502	81894	202746	115425	-0.518848	-0.495127	158156	135810	269731	284135	-0.770172	-1.06498	1	1	1	0.0002	SPAR	NA	0.0004	SPAR	NA	0.0002	SPAR	NA	0.0002	SCER	NA	0.000334064	0.00125798	0.000243994	0.000633882
Scer_12.254	Spar_12.239	YLR154C	S000004144	RNH203	304	301	8762	6791	10840.6	11497	-0.321393	-0.77378	10717	16620	6639.62	12328.7	0.676339	0.416567	4346	3143	14542.5	8255.33	-1.75659	-1.40721	7469	9320	11160.9	11527.4	-0.593713	-0.320944	1	1	1	0.0002	SPAR	NA	0.0002	SPAR	NA	0.0002	SCER	NA	0.0002	SCER	NA	0.000334064	0.000685507	0.000243994	0.000633882
Scer_12.304	Spar_12.273	YLR163C	S000004153	MAS1	1194	1251	45150	47272	44462.5	46014.7	0.0894166	0.106169	22992	31100	33087.2	49803.3	-0.457844	-0.61203	23819	14314	21636.3	10173.5	0.205934	0.559847	15090	14354	31446.9	28589.8	-0.991996	-0.926716	1	1	1	0.0038	SCER	NA	0.0214	SCER	NA	0.0002	SPAR	NA	0.8394	SPAR	NA	0.0054962	0.0407168	0.000243994	0.947358
Scer_12.305	Spar_12.274	YLR164W	S000004154	SHH4	329	341	1137	577	558.397	685.809	1.07624	-0.197156	1356	2749	529.194	482.668	1.40751	2.55903	6	288	0	0	2.85904	8.22661	147	75	104.567	7.92376	0.539124	3.14196	0	0	0	NA	NA	NA	NA	NA	NA	NA	NA	NA	NA	NA	NA	NA	NA	NA	NA
Scer_12.306	Spar_12.275	YLR165C	S000004155	PUS5	765	762	5116	7169	8482.08	9124.93	-0.734958	-0.353668	6704	8691	5951.06	8087.7	0.16618	0.0981119	830	669	725.109	1857.7	0.188994	-1.47773	1945	1300	1798.98	1229.43	0.106864	0.0747853	1	0	0	0.0002	SPAR	NA	NA	NA	LOW_COV	0.0002	SCER	NA	NA	NA	LOW_COV	0.000334064	NA	0.000243994	NA
Scer_12.307	Spar_12.276	YLR166C	S000004156	SEC10	1973	1973	26862	32647	19050.9	18319.3	0.495682	0.833548	17350	22095	12140.3	16068	0.515097	0.459501	6316	3811	3676.98	3186.22	0.780327	0.258252	7950	5923	4472.9	5836.47	0.829602	0.0212275	1	1	1	0.0002	SCER	NA	NA	NA	REPS_DISAGREE	NA	NA	REPS_DISAGREE	0.438	SPAR	NA	0.000334064	NA	NA	0.600189
Scer_12.309	Spar_12.278	YLR168C	S000004158	UPS2	431	431	20016	20961	15824.5	18015.6	0.33897	0.218446	9205	15538	21608.6	32124.1	-1.23103	-1.04781	8604	5614	6042.91	5062.06	0.509693	0.149276	2089	2755	9985.07	11018.2	-2.25641	-1.99937	1	1	1	0.0002	SCER	NA	NA	NA	REPS_DISAGREE	0.0002	SPAR	NA	0.006	SPAR	NA	0.000334064	NA	0.000243994	0.0142289
Scer_12.311	Spar_12.280	YLR170C	S000004160	APS1	336	336	12283	14555	11697.6	12709.8	0.0704485	0.195559	10432	15389	8288.69	12645.6	0.331764	0.283248	4120	1830	5959.2	4702.21	-0.532367	-1.36101	5415	5342	4404.61	4770.52	0.297884	0.163201	1	1	1	0.1284	SCER	NA	0.0002	SPAR	NA	0.0398	SCER	NA	0.0192	SCER	NA	0.153485	0.000685507	0.0426359	0.0410514
Scer_12.312	Spar_12.281	YLR172C	S000004162	DPH5	744	744	87023	83605	117907	99765.9	-0.438176	-0.254955	52354	86041	79469.3	133000	-0.602088	-0.628324	54570	31381	62908	31625.3	-0.205131	-0.0111865	54449	50057	67989.8	73364.4	-0.320408	-0.551499	1	1	1	0.0002	SPAR	NA	0.0036	SCER	NA	0.0002	SPAR	NA	0.0002	SCER	NA	0.000334064	0.00852252	0.000243994	0.000633882
Scer_12.313	Spar_12.282	YLR173W	S000004163	NA	1359	1359	8630	9708	13261.7	16018.8	-0.619772	-0.722458	6080	10236	10193.3	10130	-0.745378	0.0150136	2780	1754	4099.54	1304.32	-0.560209	0.427065	3125	2971	3962.87	4835.99	-0.342593	-0.702677	1	1	1	0.0002	SPAR	NA	0.5196	SCER	NA	NA	NA	REPS_DISAGREE	NA	NA	REPS_DISAGREE	0.000334064	0.613743	NA	NA
Scer_12.314	Spar_12.283	YLR174W	S000004164	IDP2	894	865	1666	2308	5024.58	3715.87	-1.63961	-0.734397	2414	3637	3511.22	4750.24	-0.587934	-0.432735	0	16	4.03398	317.513	-2.37928	-4.27532	150	75	629.536	422.878	-2.1096	-2.52715	1	0	0	0.0002	SPAR	NA	NA	NA	LOW_COV	0.033	SCER	NA	NA	NA	LOW_COV	0.000334064	NA	0.0354504	NA
Scer_12.315	Spar_12.284	YLR175W	S000004165	CBF5	576	638	185378	193293	189705	164215	0.114199	0.382689	75646	82965	88333.9	162316	-0.0762132	-0.820731	77789	59219	76088	52000.5	0.179384	0.335018	60703	60765	63397.4	78418.9	0.0848321	-0.220469	1	1	1	0.002	SCER	NA	NA	NA	REPS_DISAGREE	0.0002	SPAR	NA	NA	NA	REPS_DISAGREE	0.00298892	NA	0.000243994	NA
Scer_12.316	Spar_12.285	YLR176C	S000004166	RFX1	2086	1982	14356	19071	18477.7	21847.6	-0.437889	-0.269869	7496	10898	10669.6	11512.8	-0.583043	-0.152945	4018	3127	6576.4	7444.92	-0.784464	-1.32499	5611	5712	13326.9	8569.75	-1.32165	-0.658956	1	1	1	0.0002	SPAR	NA	0.0002	SPAR	NA	NA	NA	REPS_DISAGREE	0.1678	SCER	NA	0.000334064	0.000685507	NA	0.277503
Scer_12.317	Spar_12.286	YLR177W	S000004167	NA	1403	1406	13169	20734	14832.7	23906.1	-0.168544	-0.202287	23961	36778	12991.7	9469.57	0.886131	1.96044	460	1191	538.537	466.693	-0.223873	1.35283	3045	3550	1848.06	903.308	0.723205	1.97642	1	0	0	0.0002	SPAR	NA	NA	NA	LOW_COV	0.0002	SCER	NA	NA	NA	LOW_COV	0.000334064	NA	0.000243994	NA
Scer_12.318	Spar_12.287	YLR178C	S000004168	TFS1	464	464	3788	3515	3826.46	6053.18	-0.0145685	-0.783997	11357	20515	5265.96	6357.99	1.10867	1.68988	735	522	481.053	175.388	0.610515	1.56806	5509	6976	3126.34	1664.41	0.817117	2.06673	1	0	0	0.7974	SPAR	NA	NA	NA	LOW_COV	0.0002	SCER	NA	NA	NA	LOW_COV	0.825172	NA	0.000243994	NA
Scer_12.319	Spar_12.288	YLR179C	S000004169	NA	477	477	108148	107756	177605	131413	-0.715659	-0.286341	63576	103408	370884	565226	-2.54439	-2.45047	93182	66097	136182	54542.6	-0.547411	0.277196	85593	99285	673889	542151	-2.97693	-2.44904	1	1	1	0.0002	SPAR	NA	0.0332	SCER	NA	0.0002	SPAR	NA	NA	NA	REPS_DISAGREE	0.000334064	0.060075	0.000243994	NA
Scer_12.320	Spar_12.289	NA	NA	NA	687	729	155234	138987	169903	133041	-0.0446603	0.148687	69316	103150	97912.2	134676	-0.412686	-0.299133	200945	139782	167792	94602.7	0.345738	0.648829	173282	167503	227706	191253	-0.308441	-0.105684	1	1	1	NA	NA	REPS_DISAGREE	0.0002	SCER	NA	0.0002	SPAR	NA	0.9122	SPAR	NA	NA	0.000685507	0.000243994	0.982987
Scer_12.321	Spar_12.290	YLR181C	S000004171	VTA1	966	966	24505	23333	25185.4	21446.7	-0.0395086	0.121613	22781	28421	16163.4	26060.6	0.495076	0.12508	11338	5289	6574.39	5697.09	0.786146	-0.10721	10235	11271	6978.24	8695.28	0.55251	0.374273	1	1	1	NA	NA	REPS_DISAGREE	NA	NA	REPS_DISAGREE	0.0002	SCER	NA	0.4256	SPAR	NA	NA	NA	0.000243994	0.58914
Scer_12.322	Spar_12.291	YLR182W	S000004172	SWI6	1839	1842	28169	33527	28587.3	41922.7	-0.0189154	-0.320048	18743	23507	17402.8	21398	0.109379	0.13796	7874	5931	12026.3	6491.37	-0.608611	-0.127876	10225	9729	13965	15573.1	-0.447327	-0.676286	1	1	1	0.3884	SPAR	NA	NA	NA	REPS_DISAGREE	0.0002	SCER	NA	0.9598	SPAR	NA	0.431337	NA	0.000243994	0.999884
Scer_12.323	Spar_12.292	YLR183C	S000004173	TOS4	1251	1260	29279	26491	28528.8	29448.1	0.0477871	-0.142325	19493	24039	15317.2	24266.5	0.358126	-0.00324838	12081	8230	10493.4	9180.65	0.213581	-0.147345	11106	11825	14088.8	14256.5	-0.332839	-0.259418	1	1	1	NA	NA	REPS_DISAGREE	NA	NA	REPS_DISAGREE	NA	NA	REPS_DISAGREE	0.9542	SPAR	NA	NA	NA	NA	0.998297
Scer_12.326	Spar_12.294	YLR186W	S000004176	EMG1	368	368	36913	36759	37238	28368.3	-0.012647	0.373807	17949	25979	23757.5	43851.5	-0.404457	-0.755258	26249	19043	26239.1	15688.2	0.000546874	0.279569	20360	21327	19304.3	22332.5	0.0768089	-0.0664599	1	1	1	NA	NA	REPS_DISAGREE	NA	NA	REPS_DISAGREE	0.0002	SPAR	NA	0.1442	SCER	NA	NA	NA	0.000243994	0.244324
Scer_12.327	Spar_12.295	YLR187W	S000004177	SKG3	2695	2689	22934	21454	28642.9	31037.1	-0.323891	-0.535941	4791	7044	10276.4	9995.18	-1.10399	-0.507993	16242	9870	16109.7	14449.4	0.00858193	-0.553052	15014	14683	20892	18425.7	-0.479834	-0.330765	1	1	1	0.0002	SPAR	NA	NA	NA	REPS_DISAGREE	NA	NA	REPS_DISAGREE	0.0002	SCER	NA	0.000334064	NA	NA	0.000633882
Scer_12.328	Spar_12.296	YLR188W	S000004178	MDL1	1574	1574	34624	30118	35091.7	44162.7	-0.0193574	-0.552188	21611	25221	22362.1	26445.4	-0.0492907	-0.068389	5182	6247	5570.93	6171.84	-0.10439	0.0174593	8547	7585	9297.92	9139.01	-0.121476	-0.268857	1	1	1	0.4182	SPAR	NA	NA	NA	REPS_DISAGREE	NA	NA	REPS_DISAGREE	0.7504	SPAR	NA	0.462673	NA	NA	0.883557
Scer_12.329	Spar_12.297	YLR189C	S000004179	ATG26	2556	2568	20649	21644	28393.9	36957.3	-0.452734	-0.765106	14148	14692	16463.9	20038.5	-0.211938	-0.440957	2530	3252	5449.91	3548.08	-1.10003	-0.118917	5705	6181	8736.67	9528.53	-0.608012	-0.617574	1	1	1	0.0002	SPAR	NA	NA	NA	REPS_DISAGREE	0.0002	SCER	NA	0.001	SCER	NA	0.000334064	NA	0.000243994	0.00276591
Scer_12.33	Spar_12.12	YLL055W	S000003978	YCT1	1213	1213	5710	6827	2949.68	675.884	0.952694	3.33448	5622	8010	1446.41	1476.35	1.95787	2.43897	183	0	331.795	0	-0.854929	0	271	399	170.721	354.067	0.663536	0.171909	1	0	0	0.0002	SCER	NA	NA	NA	LOW_COV	NA	NA	REPS_DISAGREE	NA	NA	LOW_COV	0.000334064	NA	NA	NA
Scer_12.330	Spar_12.298	YLR190W	S000004180	MMR1	1189	1189	35688	35969	33111	43814.4	0.108124	-0.284643	20526	25702	28369.5	35544.8	-0.466869	-0.467743	9427	9495	10517.6	8989.14	-0.15792	0.0789765	12239	10647	11250.5	12393.6	0.12148	-0.219128	1	1	1	NA	NA	REPS_DISAGREE	NA	NA	REPS_DISAGREE	0.0002	SPAR	NA	0.0002	SCER	NA	NA	NA	0.000243994	0.000633882
Scer_12.331	Spar_12.299	YLR191W	S000004181	PEX13	959	953	15150	14585	13130.8	18155.6	0.197299	-0.324963	11910	15850	11657	16099.8	0.0219193	-0.0316147	5382	3603	3515.62	3441.23	0.605167	0.0571994	6474	7588	5004.27	4209.6	0.362377	0.840829	1	1	1	NA	NA	REPS_DISAGREE	0.0014	SCER	NA	NA	NA	REPS_DISAGREE	0.8926	SCER	NA	NA	0.00375397	NA	0.973323
Scer_12.332	Spar_12.300	YLR192C	S000004182	HCR1	664	664	131724	125713	170929	167116	-0.375876	-0.410714	80970	117763	89501.4	152673	-0.144522	-0.374552	103022	61046	144093	99349.2	-0.484043	-0.702603	86130	95740	104874	103217	-0.284069	-0.108485	1	1	1	0.0002	SPAR	NA	0.0562	SPAR	NA	0.4594	SCER	NA	0.0002	SCER	NA	0.000334064	0.0955521	0.463785	0.000633882
Scer_12.333	Spar_12.301	YLR193C	S000004183	UPS1	388	388	10366	10734	13491.8	11756	-0.380189	-0.1312	8990	13496	8891.51	14549.6	0.0158914	-0.108441	6094	3461	10465.2	6489.36	-0.780035	-0.906692	6977	8906	11568.5	10480.2	-0.729443	-0.234794	1	1	1	0.0514	SPAR	NA	0.0002	SPAR	NA	0.1976	SCER	NA	0.0812	SCER	NA	0.06473	0.000685507	0.203574	0.148508
Scer_12.334	Spar_12.302	YLR194C	S000004184	NA	679	682	25677	30888	13486.8	9524.91	0.935236	1.70352	13487	25582	31552.5	33380.5	-1.21976	-0.377505	22827	16438	13105.4	6189.99	0.806892	1.41524	15390	20539	40379.9	30306.3	-1.38523	-0.554869	1	1	1	0.0002	SCER	NA	0.072	SPAR	NA	0.0002	SPAR	NA	0.9982	SPAR	NA	0.000334064	0.118662	0.000243994	1
Scer_12.335	Spar_12.303	YLR195C	S000004185	NMT1	940	940	30535	28034	19033.1	16363.1	0.681925	0.77669	24519	30675	15834.3	24663.3	0.630818	0.314685	14553	8635	8027.63	4301.04	0.85819	1.00534	20154	19916	10085.4	11991.6	0.99873	0.73186	1	1	1	0.0002	SCER	NA	0.021	SCER	NA	0.0004	SPAR	NA	0.0002	SPAR	NA	0.000334064	0.0400524	0.000478845	0.000633882
Scer_12.336	Spar_12.304	YLR196W	S000004186	PWP1	1344	1344	103981	106092	90292.6	92529.7	0.203637	0.197326	39476	46680	54153.7	91538.6	-0.456073	-0.971561	70877	43248	75137	38861.5	-0.0842047	0.154286	47214	44066	77462.7	82503.4	-0.714276	-0.904773	1	1	1	0.0002	SCER	NA	0.5006	SPAR	NA	0.0002	SPAR	NA	0.4452	SPAR	NA	0.000334064	0.597273	0.000243994	0.607275
Scer_12.337	Spar_12.305	YLR197W	S000004187	NOP56	784	764	176148	172574	160696	153733	0.0951699	0.129502	81802	97024	83368.5	121822	-0.0646467	-0.365641	95744	58434	92196.7	52723.2	0.0171852	0.111085	83441	55461	81784.1	100245	-0.00834591	-0.891256	1	1	1	0.0042	SCER	NA	0.8232	SPAR	NA	0.0002	SPAR	NA	NA	NA	REPS_DISAGREE	0.00603245	0.873035	0.000243994	NA
Scer_12.339	Spar_12.307	YLR200W	S000004190	YKE2	284	284	17869	15840	18803	20965.3	-0.0734994	-0.40441	13629	22435	9940.37	19515.4	0.455269	0.201127	9266	6897	11259.9	7051.81	-0.281143	-0.0320195	7657	9178	11487.4	9725.79	-0.585141	-0.0836265	1	1	1	0.1198	SPAR	NA	NA	NA	REPS_DISAGREE	0.0002	SCER	NA	0.819	SPAR	NA	0.143744	NA	0.000243994	0.932538
Scer_12.34	Spar_12.13	YLL054C	S000003977	NA	2174	2207	11643	13230	10951.7	13244.8	0.110033	0.0201271	5169	6513	7329.04	8304.13	-0.481922	-0.328724	2529	2402	3326.02	1865.77	-0.373359	0.386031	2154	2446	2095.61	3191.19	0.0613665	-0.361798	1	1	1	0.7316	SCER	NA	NA	NA	REPS_DISAGREE	0.0002	SPAR	NA	NA	NA	REPS_DISAGREE	0.764755	NA	0.000243994	NA
Scer_12.340	Spar_12.308	YLR201C	S000004191	COQ9	641	641	10827	8953	16455.3	20204.1	-0.603877	-1.17411	11410	18672	12465.1	19141.8	-0.127583	-0.0358504	3424	3530	6272.85	4443.16	-0.873246	-0.331835	8967	8341	9154.94	8170.65	-0.0299218	0.0297666	1	1	1	0.0002	SPAR	NA	NA	NA	REPS_DISAGREE	0.0002	SCER	NA	0.0004	SCER	NA	0.000334064	NA	0.000243994	0.00118809
Scer_12.342	Spar_12.310	YLR203C	S000004193	MSS51	1074	1074	41214	41112	37716.1	48642.8	0.127952	-0.242662	21973	32752	22930.3	26649	-0.0615218	0.297494	17250	9839	16029	13068.4	0.105902	-0.409465	18927	14481	24176.3	18400.6	-0.353131	-0.345573	1	1	1	NA	NA	REPS_DISAGREE	0.8972	SPAR	NA	NA	NA	REPS_DISAGREE	0.41	SPAR	NA	NA	0.928612	NA	0.572597
Scer_12.343	Spar_12.311	YLR204W	S000004194	QRI5	263	260	17262	15269	21804.3	16524.9	-0.353544	-0.130582	7828	13844	14111.6	25355.5	-0.866631	-0.889544	16041	6358	11866	6791.75	0.418352	-0.111747	4616	10528	12759.3	9989.77	-1.48319	0.0591488	1	1	1	0.043	SPAR	NA	0.8598	SCER	NA	0.0002	SPAR	NA	NA	NA	REPS_DISAGREE	0.0547614	0.899349	0.000243994	NA
Scer_12.344	Spar_12.312	YLR205C	S000004195	HMX1	662	665	16635	24446	24195.5	37922	-0.533969	-0.626891	5751	8454	28032.6	32149	-2.2785	-1.92042	8763	6925	13365.6	16469.3	-0.602448	-1.24325	1644	2675	20772.5	14236.5	-3.65206	-2.40502	1	1	1	0.0002	SPAR	NA	0.5884	SPAR	NA	0.0002	SPAR	NA	NA	NA	REPS_DISAGREE	0.000334064	0.67519	0.000243994	NA
Scer_12.346	Spar_12.315	YLR207W	S000004197	HRD3	2038	2032	23009	22550	23396.1	21065.6	-0.0283241	0.0939832	16653	22703	13104.3	19335.9	0.341467	0.227334	8274	4729	8303.96	3962.36	-0.00946701	0.250863	11191	8683	9041.84	9144.85	0.303367	-0.0790114	1	1	1	NA	NA	REPS_DISAGREE	0.7378	SCER	NA	0.0002	SCER	NA	0.0178	SPAR	NA	NA	0.805957	0.000243994	0.0386097
Scer_12.347	Spar_12.316	YLR208W	S000004198	SEC13	633	633	73039	71664	75883.4	67608.3	-0.0551173	0.0840474	48261	63454	49850.8	76541.6	-0.0467583	-0.270528	62937	31148	65471.6	36732.7	-0.0569592	-0.237918	67139	64792	55143	50398	0.283967	0.362442	1	1	1	NA	NA	REPS_DISAGREE	0.992	SPAR	NA	NA	NA	REPS_DISAGREE	0.1232	SCER	NA	NA	0.995705	NA	0.213167
Scer_12.348	Spar_12.317	YLR209C	S000004199	PNP1	681	681	14462	15753	26320	24967	-0.863849	-0.664364	15197	24271	20923.5	34469.6	-0.461314	-0.506071	6873	6143	15976.6	8751.26	-1.21683	-0.510477	12173	13785	21976.1	21603.5	-0.852199	-0.648128	1	1	1	0.0002	SPAR	NA	NA	NA	REPS_DISAGREE	0.0006	SCER	NA	0.0002	SCER	NA	0.000334064	NA	0.000712427	0.000633882
Scer_12.349	Spar_12.318	YLR210W	S000004200	CLB4	1150	1147	13506	13436	13598.9	17527.3	-0.0136566	-0.387247	10596	12605	11444.8	16860.8	-0.114932	-0.423412	5147	2925	3272.57	1450.48	0.649379	1.00764	4082	4748	5633.81	4889.38	-0.468506	-0.0460901	1	1	1	0.6876	SPAR	NA	0.0002	SCER	NA	NA	NA	REPS_DISAGREE	0.4484	SPAR	NA	0.723935	0.000685507	NA	0.610368
Scer_12.351	Spar_12.320	YLR212C	S000004202	TUB4	1024	1024	20724	20863	27420.9	32477.2	-0.403959	-0.638455	14565	20238	15469.6	20254	-0.086927	-0.00114205	6417	2891	8215.21	3881.72	-0.356349	-0.425	7695	7248	8585.16	7642.26	-0.157904	-0.0764055	1	1	1	0.0002	SPAR	NA	0.4408	SCER	NA	0.0002	SCER	NA	0.0002	SCER	NA	0.000334064	0.541273	0.000243994	0.000633882
Scer_12.352	Spar_12.321	YLR213C	S000004203	CRR1	1045	1057	4185	5855	7501.16	6856.11	-0.825262	-0.211212	3622	2884	3952.07	4899.68	-0.109316	-0.747939	991	493	995.386	254.01	0.0101083	0.970428	1534	1861	915.494	836.165	0.760514	1.16974	1	0	0	0.0246	SPAR	NA	NA	NA	LOW_COV	NA	NA	REPS_DISAGREE	NA	NA	LOW_COV	0.0323995	NA	NA	NA
Scer_12.353	Spar_12.322	YLR214W	S000004204	FRE1	1609	1612	166163	187171	235578	238523	-0.500915	-0.34708	59673	50337	128113	155007	-1.09956	-1.61993	66795	57363	121033	83184.3	-0.854887	-0.533496	70355	28332	76839.6	101977	-0.124508	-1.84502	1	1	1	0.0002	SPAR	NA	0.0226	SPAR	NA	0.0002	SPAR	NA	0.0002	SCER	NA	0.000334064	0.0427592	0.000243994	0.000633882
Scer_12.354	Spar_12.323	YLR215C	S000004205	CDC123	911	953	13529	11545	13185.3	13835.3	0.102147	-0.196038	8425	10477	9412.91	17851.9	-0.0949204	-0.703766	7839	3071	3552.93	1802.26	1.20646	0.833594	5791	6368	3149.81	3970.22	0.943363	0.74651	1	1	1	NA	NA	REPS_DISAGREE	0.0002	SCER	NA	NA	NA	REPS_DISAGREE	0.1548	SCER	NA	NA	0.000685507	NA	0.259671
Scer_12.355	Spar_12.324	YLR216C	S000004206	CPR6	819	819	137413	132552	143060	143861	-0.0580979	-0.118118	75536	124672	120100	202229	-0.668996	-0.697851	78491	46822	87638.3	55895.4	-0.159033	-0.255537	69706	75994	124426	122002	-0.835925	-0.682937	1	1	1	0.0724	SPAR	NA	0.1728	SPAR	NA	0.0002	SPAR	NA	0.4374	SCER	NA	0.0895359	0.250412	0.000243994	0.600189
Scer_12.357	Spar_12.327	YLR219W	S000004209	MSC3	1905	1944	22338	19968	17451.1	20568.3	0.385398	-0.0134948	16144	22400	10733.7	11572	0.618039	0.982036	5598	6309	9280.18	6335.14	-0.699902	0.023274	12144	12869	15892	12298.9	-0.358795	0.0945998	1	1	1	NA	NA	REPS_DISAGREE	NA	NA	REPS_DISAGREE	0.0002	SCER	NA	0.9114	SPAR	NA	NA	NA	0.000243994	0.982733
Scer_12.358	Spar_12.328	YLR220W	S000004210	CCC1	677	677	29264	28027	32091.4	38305.1	-0.133057	-0.450704	20916	28872	18863.9	31815.7	0.14897	-0.140065	8818	6859	11188.3	7282.63	-0.343427	-0.0864499	12594	14330	11677.4	9701.6	0.109015	0.562696	1	1	1	0.0004	SPAR	NA	NA	NA	REPS_DISAGREE	NA	NA	REPS_DISAGREE	0.74	SCER	NA	0.000643008	NA	NA	0.877237
Scer_12.359	Spar_12.329	YLR221C	S000004211	RSA3	590	650	38720	31061	38759.5	34079.1	0.138255	0.00594764	21648	30955	19041.5	37509.8	0.324804	-0.137364	20006	9021	23653.3	16640.7	-0.101871	-0.743558	9981	11798	17437.1	17443.5	-0.665115	-0.424385	1	1	1	0.8746	SCER	NA	0.0032	SPAR	NA	NA	NA	REPS_DISAGREE	0.9974	SPAR	NA	0.892938	0.00763673	NA	1
Scer_12.360	Spar_12.330	YLR222C	S000004212	UTP13	1914	1914	76130	80327	75433.1	73891.7	0.0132663	0.120471	27966	30597	49597.9	72899.2	-0.826583	-1.25249	31176	19983	30417.3	17308	0.0355449	0.207325	20586	19907	38627.9	43897.2	-0.907946	-1.14081	1	1	1	0.6102	SCER	NA	0.6318	SCER	NA	0.0002	SPAR	NA	0.9332	SPAR	NA	0.65145	0.713225	0.000243994	0.989918
Scer_12.362	Spar_12.332	YLR223C	S000004213	IFH1	2606	2589	54217	56888	46410.4	53565.6	0.21485	0.0773747	21922	24022	26374	32834.3	-0.276167	-0.460274	8656	7014	7370.09	5074.16	0.222547	0.457549	8572	9313	10924	13533.4	-0.359209	-0.548596	1	1	1	0.0198	SCER	NA	0.9262	SCER	NA	0.0002	SPAR	NA	0.633	SPAR	NA	0.0263249	0.95072	0.000243994	0.788032
Scer_12.363	Spar_12.333	YLR224W	S000004214	NA	766	766	23302	23836	26643.4	26742.6	-0.193314	-0.16599	16163	24328	21287.3	31839.8	-0.397277	-0.388199	1563	1412	3090.03	2067.36	-0.982848	-0.549726	1754	1323	3809.22	4162.06	-1.1184	-1.65274	1	1	1	0.0006	SPAR	NA	0.0116	SPAR	NA	0.0002	SPAR	NA	NA	NA	REPS_DISAGREE	0.000945863	0.0238142	0.000243994	NA
Scer_12.364	Spar_12.334	YLR225C	S000004215	NA	905	905	15397	16504	10528.2	8645.56	0.548346	0.932705	13590	19217	20451.5	27960.4	-0.589626	-0.540978	5025	3358	5045.51	4181.09	-0.00587419	-0.316192	7149	6405	10576.2	11974.5	-0.564942	-0.902586	1	1	1	0.0002	SCER	NA	0.0002	SPAR	NA	0.0002	SPAR	NA	NA	NA	REPS_DISAGREE	0.000334064	0.000685507	0.000243994	NA
Scer_12.365	Spar_12.335	YLR226W	S000004216	BUR2	918	918	16801	12378	13687.2	17501.5	0.295704	-0.499669	10246	11500	9903.99	12748.6	0.0489739	-0.148695	4143	1287	4737.91	983.786	-0.193533	0.387251	3133	3091	3747.34	3518.98	-0.258245	-0.187028	1	0	0	NA	NA	REPS_DISAGREE	NA	NA	LOW_COV	NA	NA	REPS_DISAGREE	NA	NA	LOW_COV	NA	NA	NA	NA
Scer_12.366	Spar_12.336	YLR227C	S000004217	ADY4	1192	1192	5187	6685	4643.72	4537.65	0.159587	0.558879	4338	6163	3337.13	4155.93	0.378322	0.568349	531	375	53.4503	197.563	3.28841	0.921132	499	174	230.474	20.852	1.11108	3.00152	1	0	0	0.0004	SCER	NA	NA	NA	LOW_COV	NA	NA	REPS_DISAGREE	NA	NA	LOW_COV	0.000643008	NA	NA	NA
Scer_12.37	Spar_12.15	YLL051C	S000003974	FRE6	1658	1658	15959	20922	13192.2	12257.2	0.274661	0.771339	14221	18625	9023.16	10324.1	0.65626	0.85116	3092	2939	2847.99	1707.51	0.118555	0.783075	5751	3855	3077.26	2832.95	0.901951	0.44429	1	1	1	0.0002	SCER	NA	NA	NA	REPS_DISAGREE	NA	NA	REPS_DISAGREE	0.0002	SPAR	NA	0.000334064	NA	NA	0.000633882
Scer_12.380	Spar_12.340	YLR228C	S000004218	ECM22	1966	1969	15310	15398	11660.9	14861.5	0.394969	0.0533582	11739	15567	9690.93	9795.07	0.278777	0.670508	3237	2141	3531.75	3045.1	-0.12349	-0.505804	5621	5604	3900.99	3725.83	0.529075	0.590963	1	1	1	0.3394	SCER	NA	0.0002	SPAR	NA	NA	NA	REPS_DISAGREE	0.9102	SCER	NA	0.381757	0.000685507	NA	0.982733
Scer_12.381	Spar_12.341	YLR229C	S000004219	CDC42	164	164	17500	17834	16656.7	14238.2	0.0712493	0.32484	13734	20457	10908.7	20485.1	0.332248	-0.00197713	15114	11849	12031.4	4672.98	0.329062	1.34216	15555	16929	8751.61	10246.7	0.829686	0.724286	1	1	1	0.3608	SCER	NA	0.0058	SCER	NA	NA	NA	REPS_DISAGREE	0.034	SPAR	NA	0.40324	0.0130638	NA	0.0684063
Scer_12.383	Spar_12.343	YLR231C	S000004221	BNA5	1067	1067	9188	8890	27633.2	21541	-1.58848	-1.27673	21091	30828	9263.94	16038.8	1.18684	0.942628	3340	3076	7120.99	5138.67	-1.092	-0.74015	17891	16793	5731.97	5996.62	1.64196	1.48548	1	1	1	0.0002	SPAR	NA	0.0004	SCER	NA	0.0002	SCER	NA	0.8882	SCER	NA	0.000334064	0.00125798	0.000243994	0.971897
Scer_12.384	Spar_12.344	YLR233C	S000004223	EST1	1946	2005	6799	5481	8602.09	7431.75	-0.296229	-0.396103	4845	7006	6227.35	8266.34	-0.318964	-0.195535	225	195	434.662	744.895	-0.903795	-1.88503	534	317	537.773	469.587	0.0329526	-0.522344	1	0	0	0.0002	SPAR	NA	NA	NA	LOW_COV	NA	NA	REPS_DISAGREE	NA	NA	LOW_COV	0.000334064	NA	NA	NA
Scer_12.385	Spar_12.345	YLR234W	S000004224	TOP3	1529	1498	4768	4014	4998.79	3417.14	-0.0977319	0.202639	2915	3405	3261.78	3867.36	-0.191661	-0.213193	1489	1267	1485.51	1516	-0.0261722	-0.288215	1728	2392	2661.12	2649.04	-0.652189	-0.176743	1	0	0	NA	NA	REPS_DISAGREE	NA	NA	LOW_COV	0.0068	SPAR	NA	NA	NA	LOW_COV	NA	NA	0.00762545	NA
Scer_12.387	Spar_12.347	NA	NA	NA	1094	1072	25183	25249	7996.08	7306.7	1.62565	1.75949	6317	9799	7768.16	9433.5	-0.327598	0.0255278	12000	10796	2572.67	1357.75	2.19195	2.96098	5812	4959	3625.7	4501.95	0.651319	0.110163	1	1	1	0.0002	SCER	NA	0.0002	SCER	NA	0.0002	SPAR	NA	0.0002	SPAR	NA	0.000334064	0.000685507	0.000243994	0.000633882
Scer_12.388	Spar_12.348	YLR238W	S000004228	FAR10	1030	996	9449	9325	12570.4	10351.6	-0.460183	-0.199096	8716	10766	8936.54	13158.3	-0.0844735	-0.337892	2221	1328	2404.25	2747.75	-0.162758	-1.09686	3168	2352	3213.83	3638.26	-0.0691425	-0.677569	1	1	1	0.0014	SPAR	NA	NA	NA	REPS_DISAGREE	NA	NA	REPS_DISAGREE	0.0178	SCER	NA	0.00212301	NA	NA	0.0386097
Scer_12.389	Spar_12.349	YLR239C	S000004229	LIP2	856	856	15240	12442	17732.8	14028.8	-0.218545	-0.173162	7839	13325	9141.81	16027.7	-0.221785	-0.266411	5290	4997	4092.48	1644.01	0.370214	1.60325	3849	3587	3339.74	3692.05	0.204691	-0.0416346	1	1	1	0.0042	SPAR	NA	0.0002	SCER	NA	0.4854	SPAR	NA	0.1452	SPAR	NA	0.00603245	0.000685507	0.489389	0.245247
Scer_12.39	Spar_12.17	YLL049W	S000003972	LDB18	483	483	11220	10810	16423.6	14464.5	-0.549658	-0.420118	9127	16050	12570.8	20575.2	-0.461815	-0.358316	1727	1024	3473.26	1749.85	-1.0076	-0.77243	2560	1375	3512.59	3489.79	-0.456241	-1.34307	1	0	0	0.0002	SPAR	NA	NA	NA	LOW_COV	NA	NA	REPS_DISAGREE	NA	NA	LOW_COV	0.000334064	NA	NA	NA
Scer_12.390	Spar_12.350	YLR240W	S000004230	VPS34	1903	1903	15629	18925	14123.6	19540.1	0.146111	-0.0461424	8499	10477	9797.46	11089.3	-0.205092	-0.0819408	3473	2636	2990.19	4682.05	0.215878	-0.828552	4995	3077	3845.5	5295.57	0.377227	-0.783066	1	1	1	NA	NA	REPS_DISAGREE	NA	NA	REPS_DISAGREE	0.0266	SPAR	NA	NA	NA	REPS_DISAGREE	NA	NA	0.028716	NA
Scer_12.391	Spar_12.351	YLR241W	S000004231	NA	1702	1702	23221	26438	31801.8	31019.2	-0.453663	-0.230541	20697	26365	27530.2	31601.9	-0.411578	-0.261377	5557	2913	4379.9	3109.61	0.343339	-0.0941962	10761	9043	9372.61	12395.3	0.199269	-0.454872	1	1	1	0.0002	SPAR	NA	0.1958	SCER	NA	NA	NA	REPS_DISAGREE	NA	NA	REPS_DISAGREE	0.000334064	0.278118	NA	NA
Scer_12.392	Spar_12.352	YLR242C	S000004232	ARV1	540	540	6170	5706	8416.62	11173.4	-0.447907	-0.969397	5508	7801	8212.47	11981.7	-0.576202	-0.619035	1205	1346	1162.8	756.991	0.0513917	0.829498	1693	1287	571.917	988.802	1.56404	0.379921	1	0	0	0.0002	SPAR	NA	NA	NA	LOW_COV	NA	NA	REPS_DISAGREE	NA	NA	LOW_COV	0.000334064	NA	NA	NA
Scer_12.393	Spar_12.353	YLR243W	S000004233	GPN3	482	482	17286	18740	20749.9	18764	-0.263489	-0.00184462	9276	13668	18330.4	27510.4	-0.982586	-1.00912	13229	7335	13322.2	11968.7	-0.0101312	-0.706324	6322	9062	22409.3	19025.8	-1.82548	-1.06997	1	1	1	0.9822	SPAR	NA	NA	NA	REPS_DISAGREE	0.0002	SPAR	NA	NA	NA	REPS_DISAGREE	0.985573	NA	0.000243994	NA
Scer_12.394	Spar_12.354	YLR244C	S000004234	MAP1	929	929	116112	119827	93045	100192	0.319514	0.258188	67854	90196	68839.5	91281.8	-0.0208015	-0.017264	94089	88895	71581	57217.8	0.394444	0.635629	107903	123038	75102.5	72168.3	0.522796	0.769658	1	1	1	0.0002	SCER	NA	0.2524	SCER	NA	0.0002	SPAR	NA	0.6494	SCER	NA	0.000334064	0.343653	0.000243994	0.8035
Scer_12.395	Spar_12.355	YLR245C	S000004235	CDD1	370	394	5302	6559	2057.04	1980.01	1.45621	1.81813	2779	3953	1527.82	1443.71	0.953335	1.5432	4950	2152	1352.39	1028.14	1.96181	1.15558	4970	5183	1583.44	1892.11	1.74023	1.54398	1	1	1	0.0002	SCER	NA	NA	NA	REPS_DISAGREE	NA	NA	REPS_DISAGREE	0.0002	SPAR	NA	0.000334064	NA	NA	0.000633882
Scer_12.396	Spar_12.356	YLR246W	S000004236	ERF2	761	722	5142	6124	8447.36	8094.73	-0.791959	-0.478349	4305	6380	5938.93	8438.96	-0.539995	-0.479352	343	939	486.095	197.563	-0.577693	2.16716	658	420	992.319	901.223	-0.667876	-1.17556	1	0	0	0.0002	SPAR	NA	NA	NA	LOW_COV	NA	NA	REPS_DISAGREE	NA	NA	LOW_COV	0.000334064	NA	NA	NA
Scer_12.398	Spar_12.361	YLR247C	S000004237	IRC20	4081	4081	32506	39187	30808	38056	0.0773973	0.0422517	18427	19850	21360.9	25496.4	-0.213142	-0.361138	4858	5224	4632.02	3550.1	0.0687057	0.557167	7483	4136	5973.12	7207.7	0.325084	-0.801154	1	1	1	0.2314	SCER	NA	NA	NA	REPS_DISAGREE	0.0002	SPAR	NA	NA	NA	REPS_DISAGREE	0.266783	NA	0.000243994	NA
Scer_12.399	Spar_12.362	YLR248W	S000004238	RCK2	1183	1183	39390	38844	34475.8	33413.1	0.192241	0.217272	27799	31926	26630.3	34469.6	0.0619594	-0.110587	17125	8222	16406.2	10741	0.0618579	-0.385526	19179	20365	33465.7	30230.4	-0.803123	-0.569885	1	1	1	0.0002	SCER	NA	0.0208	SPAR	NA	0.0002	SPAR	NA	0.8024	SPAR	NA	0.000334064	0.0397351	0.000243994	0.920249
Scer_12.400	Spar_12.363	NA	NA	NA	810	844	605505	594925	615520	571536	0.0356547	0.117184	166773	187407	259586	309009	-0.579002	-0.66215	1191117	759948	1.04082e+06	707353	0.253911	0.162791	969615	979595	1.06172e+06	1.0516e+06	-0.0716028	-0.0430057	1	1	1	0.2488	SCER	NA	0.4828	SCER	NA	0.0002	SPAR	NA	0.404	SCER	NA	0.28581	0.581561	0.000243994	0.565097
Scer_12.401	Spar_12.364	YLR250W	S000004240	SSP120	565	565	27021	24598	25811.2	30725.4	0.0660803	-0.320881	25577	38069	19743.9	31553.8	0.373424	0.270796	11375	5316	9338.67	4465.34	0.284549	0.25152	19603	18771	11927	13025.8	0.716792	0.527097	1	1	1	NA	NA	REPS_DISAGREE	0.0208	SCER	NA	0.0002	SCER	NA	NA	NA	REPS_DISAGREE	NA	0.0397351	0.000243994	NA
Scer_12.402	Spar_12.365	YLR251W	S000004241	SYM1	467	467	3830	5505	2341.7	2967.54	0.709551	0.891252	6522	10312	2648.57	3411.31	1.29978	1.59564	262	327	791.669	314.489	-1.59166	0.0561069	937	795	1549.3	1711.11	-0.724885	-1.10494	1	0	0	0.0002	SCER	NA	NA	NA	LOW_COV	0.0002	SCER	NA	NA	NA	LOW_COV	0.000334064	NA	0.000243994	NA
Scer_12.404	Spar_12.367	YLR253W	S000004243	NA	1330	1330	30499	32079	23518.1	24677.2	0.374975	0.378436	18244	24641	14561.1	21734.7	0.325285	0.181055	4170	3466	4926.5	3419.06	-0.240464	0.019667	5378	4636	4833.55	5012.82	0.153956	-0.112718	1	1	1	0.0002	SCER	NA	0.0016	SPAR	NA	0.0226	SPAR	NA	NA	NA	REPS_DISAGREE	0.000334064	0.00418584	0.0244927	NA
Scer_12.405	Spar_12.368	YLR254C	S000004244	NDL1	447	450	6013	10844	4008.95	6635.77	0.59439	0.718126	8246	12552	6167.58	9127.75	0.42858	0.469193	702	708	1137.58	284.25	-0.685993	1.32321	1877	1865	3105	1977.6	-0.716209	-0.0748832	1	0	0	0.0002	SCER	NA	NA	NA	LOW_COV	0.0042	SPAR	NA	NA	NA	LOW_COV	0.000334064	NA	0.00477797	NA
Scer_12.41	Spar_12.21	YLL046C	S000003969	RNP1	560	560	277	1287	112.076	361.266	1.29779	1.83001	224	850	173.222	97.0489	0.368995	3.11759	0	0	62.5268	0	-5.98929	0	39	58	57.6185	77.1524	-0.551356	-0.405575	0	0	0	NA	NA	NA	NA	NA	NA	NA	NA	NA	NA	NA	NA	NA	NA	NA	NA
Scer_12.419	Spar_12.372	YLR257W	S000004247	NA	816	816	80861	84581	78038.7	88486.3	0.0512542	-0.065119	71593	99448	75508.5	116843	-0.0768199	-0.23255	37671	34699	36774.8	25396	0.0347355	0.450279	42624	59853	61090.6	53882.4	-0.519273	0.151607	1	1	1	NA	NA	REPS_DISAGREE	NA	NA	REPS_DISAGREE	0.0038	SPAR	NA	NA	NA	REPS_DISAGREE	NA	NA	0.00433579	NA
Scer_12.420	Spar_12.373	NA	NA	NA	1512	1483	10200	19917	13144.6	25976.4	-0.393813	-0.411123	47187	63840	15608.2	7568.1	1.56808	3.04835	1666	498	819.907	419.318	0.994023	0.219618	15917	14077	1611.18	1212.34	3.27563	3.50845	1	0	0	0.0002	SPAR	NA	NA	NA	LOW_COV	0.0002	SCER	NA	NA	NA	LOW_COV	0.000334064	NA	0.000243994	NA
Scer_12.421	Spar_12.374	YLR259C	S000004249	HSP60	1176	1176	468771	376287	452198	397014	0.051928	-0.0773564	157779	220412	210983	347979	-0.41922	-0.658794	483430	290999	457475	290645	0.0796139	0.00175542	398334	533593	485869	451716	-0.286588	0.240322	1	1	1	NA	NA	REPS_DISAGREE	0.483	SCER	NA	0.0002	SPAR	NA	0.0002	SCER	NA	NA	0.581561	0.000243994	0.000633882
Scer_12.422	Spar_12.375	NA	NA	NA	1480	1496	14707	17381	17811.2	20510.8	-0.260749	-0.223344	9619	12914	12471.1	16160.8	-0.359088	-0.308027	4578	2096	5951.14	3834.34	-0.362862	-0.855516	3970	4780	7486.14	7052.15	-0.899399	-0.545441	1	1	1	0.0004	SPAR	NA	0.1348	SPAR	NA	0.034	SPAR	NA	0.7302	SCER	NA	0.000643008	0.203577	0.0364991	0.871581
Scer_12.423	Spar_12.376	YLR262C	S000004252	YPT6	493	493	17293	14850	18544.1	19057.8	-0.100769	-0.359894	14820	22995	12176.7	19856.4	0.283405	0.211707	6875	2937	8001.41	5025.77	-0.218865	-0.774798	8769	9059	7240.73	9093.97	0.276243	-0.00555823	1	1	1	0.0246	SPAR	NA	0.4716	SPAR	NA	0.0002	SCER	NA	0.9048	SCER	NA	0.0323995	0.571279	0.000243994	0.978535
Scer_12.425	Spar_12.378	YLR263W	S000004253	RED1	2117	2159	6472	6698	4353.11	4079.13	0.600397	0.743674	4972	5132	2969.03	3900.85	0.77198	0.423985	0	0	385.246	71.5664	-8.56503	-6.15289	64	0	243.278	248.973	-1.88167	-7.93729	1	0	0	0.0002	SCER	NA	NA	NA	LOW_COV	NA	NA	REPS_DISAGREE	NA	NA	LOW_COV	0.000334064	NA	NA	NA
Scer_12.428	Spar_12.381	YLR265C	S000004255	NEJ1	1002	1005	892	1844	282.67	555.793	1.65876	1.73272	11342	18673	440.851	688.79	4.68641	4.76304	171	174	170.436	0	0.00905281	7.45552	3515	3045	59.7525	11.2601	5.85916	7.96112	0	0	0	NA	NA	NA	NA	NA	NA	NA	NA	NA	NA	NA	NA	NA	NA	NA	NA
Scer_12.429	Spar_12.382	YLR266C	S000004256	PDR8	1878	1878	13415	17126	15025.1	17645.4	-0.16352	-0.043105	18837	27398	6705.44	8290.38	1.49003	1.72444	838	666	807.805	1750.86	0.0528782	-1.39313	936	1107	934.7	1176.89	0.00200267	-0.0882428	1	0	0	0.387	SPAR	NA	NA	NA	LOW_COV	0.0002	SCER	NA	NA	NA	LOW_COV	0.430191	NA	0.000243994	NA
Scer_12.43	Spar_12.23	YLL043W	S000003966	FPS1	1399	1446	47556	50008	43664	49462.6	0.17085	0.0634914	33248	40172	45069	50460.3	-0.391185	-0.281279	12443	7280	11334.5	8180.74	0.182275	-0.1206	16546	15357	22703.8	20002.5	-0.408758	-0.333589	1	1	1	0.0466	SCER	NA	NA	NA	REPS_DISAGREE	0.0002	SPAR	NA	0.0864	SPAR	NA	0.0589392	NA	0.000243994	0.156742
Scer_12.430	Spar_12.383	YLR267W	S000004257	BOP2	1332	1332	1745	1614	3001.26	5743.53	-0.781995	-1.83065	3794	8951	6310.49	5895.94	-0.733881	0.602244	134	30	323.727	283.242	-1.26627	-3.19678	605	564	1871.53	1360.38	-1.6276	-1.26875	1	0	0	0.0002	SPAR	NA	NA	NA	LOW_COV	0.0002	SCER	NA	NA	NA	LOW_COV	0.000334064	NA	0.000243994	NA
Scer_12.431	Spar_12.384	YLR268W	S000004258	SEC22	381	381	14101	14463	16478.2	13302.3	-0.224743	0.120681	12383	21236	11243	15828.4	0.139322	0.423971	7283	7052	9921.58	7180.83	-0.445985	-0.0261141	10392	9641	10343.6	9781.67	0.00673585	-0.0208961	1	1	1	NA	NA	REPS_DISAGREE	0.3168	SPAR	NA	0.0072	SCER	NA	0.5982	SPAR	NA	NA	0.414169	0.00806516	0.76042
Scer_12.433	Spar_12.386	YLR270W	S000004260	DCS1	676	676	11170	12882	14894.2	18443.4	-0.415091	-0.517715	13931	20035	12660	18155.9	0.138016	0.142078	4984	5489	8264.63	4989.49	-0.72953	0.137626	15676	14476	17731.6	16281.7	-0.177751	-0.169573	1	1	1	0.0002	SPAR	NA	NA	NA	REPS_DISAGREE	0.0002	SCER	NA	0.215	SPAR	NA	0.000334064	NA	0.000243994	0.339315
Scer_12.434	Spar_12.387	YLR271W	S000004261	NA	691	694	4065	3020	2404.18	2131.86	0.763715	0.508484	3591	6084	1446.41	2537.01	1.31757	1.26781	540	307	73.6202	84.6701	2.86424	1.85232	796	1234	358.515	524.219	1.15478	1.23977	1	0	0	0.0002	SCER	NA	NA	NA	LOW_COV	0.0002	SCER	NA	NA	NA	LOW_COV	0.000334064	NA	0.000243994	NA
Scer_12.435	Spar_12.388	YLR272C	S000004262	YCS4	2778	2790	28099	26928	35690.8	40213.6	-0.338803	-0.572341	15072	16753	18792.9	22599.5	-0.312079	-0.425632	6438	3144	7490.1	3660.97	-0.212123	-0.213342	6911	5566	9933.86	11406.9	-0.517177	-1.02884	1	1	1	0.0002	SPAR	NA	0.0574	SCER	NA	NA	NA	REPS_DISAGREE	NA	NA	REPS_DISAGREE	0.000334064	0.0971732	NA	NA
Scer_12.438	Spar_12.394	YLR273C	S000004263	PIG1	1855	1897	6092	8429	6929.87	8437.14	-0.153584	0.0309081	4859	6106	6465.53	8507.67	-0.379734	-0.446169	588	240	676.701	303.401	-0.170081	-0.30464	1152	1003	2166.03	2387.14	-0.878025	-1.21783	1	0	0	NA	NA	REPS_DISAGREE	NA	NA	LOW_COV	0.0002	SPAR	NA	NA	NA	LOW_COV	NA	NA	0.000243994	NA
Scer_12.439	Spar_12.395	YLR274W	S000004264	MCM5	1733	1733	26439	38030	26810	34376.8	-0.0201021	0.145698	20596	26317	24202.6	31041.9	-0.23279	-0.238214	11329	6023	9872.17	5492.47	0.198563	0.133005	11369	8682	11534.4	13166	-0.0208322	-0.600656	1	1	1	NA	NA	REPS_DISAGREE	NA	NA	REPS_DISAGREE	0.0002	SPAR	NA	NA	NA	REPS_DISAGREE	NA	NA	0.000243994	NA
Scer_12.44	Spar_12.24	YLL042C	S000003965	ATG10	382	421	1958	1380	1914.22	1986.96	0.172855	-0.385328	666	1756	1727.89	2056.92	-1.23384	-0.0878267	492	351	813.856	1482.73	-0.584711	-1.93534	739	246	1020.06	881.622	-0.324224	-1.69704	1	0	0	NA	NA	REPS_DISAGREE	NA	NA	LOW_COV	NA	NA	LOW_COV	NA	NA	LOW_COV	NA	NA	NA	NA
Scer_12.440	Spar_12.396	YLR275W	S000004265	SMD2	239	239	5225	3640	10293.1	6845.19	-0.978045	-0.910966	4529	5628	5732.8	9898.13	-0.33998	-0.814424	2706	1456	5540.68	3780.92	-1.03363	-1.37612	1902	3192	2889.46	4215.44	-0.603024	-0.401113	1	1	1	0.0002	SPAR	NA	0.606	SPAR	NA	0.002	SCER	NA	0.0002	SCER	NA	0.000334064	0.690694	0.00230862	0.000633882
Scer_12.441	Spar_12.397	YLR276C	S000004266	DBP9	1124	1124	75766	80969	68237.5	62682.6	0.150984	0.3693	33981	38864	48232.9	77547.3	-0.505277	-0.996623	28420	14185	28890.4	15668	-0.0236822	-0.143445	17204	16126	26542.9	29061.8	-0.625554	-0.849698	1	1	1	0.0002	SCER	NA	0.0174	SPAR	NA	0.0002	SPAR	NA	NA	NA	REPS_DISAGREE	0.000334064	0.033953	0.000243994	NA
Scer_12.442	Spar_12.398	YLR277C	S000004267	YSH1	1622	1625	24970	26140	25254.8	28730.5	-0.0136956	-0.133655	15020	21821	18137.3	24350.7	-0.269389	-0.155573	5908	4083	3975.49	2714.48	0.574084	0.59144	5789	5032	5550.58	6917.44	0.0633301	-0.456363	1	1	1	0.6108	SPAR	NA	0.0002	SCER	NA	0.0404	SPAR	NA	0.0066	SPAR	NA	0.651892	0.000685507	0.0432032	0.0156105
Scer_12.443	Spar_12.399	YLR278C	S000004268	NA	3292	3295	22264	28789	18556	25868.2	0.264126	0.155646	13302	17327	10477.4	10824.8	0.345653	0.679943	3720	4199	3717.32	3582.35	0.0023549	0.230394	7317	6842	7035.86	6656.37	0.0578318	0.0409898	1	1	1	0.0004	SCER	NA	NA	NA	REPS_DISAGREE	0.0002	SCER	NA	0.012	SPAR	NA	0.000643008	NA	0.000243994	0.0269625
Scer_12.444	Spar_12.401	YLR281C	S000004271	NA	440	440	1014	1004	1625.6	1634.63	-0.680379	-0.702649	1555	2770	1775.53	2488.06	-0.19122	0.154806	361	331	577.868	359.848	-0.677245	-0.120207	1225	1988	1143.83	1163.12	0.0988205	0.772798	0	0	0	NA	NA	NA	NA	NA	NA	NA	NA	NA	NA	NA	NA	NA	NA	NA	NA
Scer_12.445	Spar_12.402	YLR283W	S000004273	NA	786	786	6864	8811	9813.1	10900.5	-0.515597	-0.306985	7554	12380	8107.68	10239.1	-0.102035	0.273899	1157	1393	2418.37	2013.94	-1.063	-0.531505	2127	2277	1843.79	2101.05	0.20604	0.115973	1	1	1	0.0002	SPAR	NA	0.199	SPAR	NA	0.0002	SCER	NA	0.0724	SCER	NA	0.000334064	0.282155	0.000243994	0.134329
Scer_12.446	Spar_12.403	YLR284C	S000004274	ECI1	714	714	3114	5603	1645.44	1392.46	0.919886	2.00778	4466	7914	978.707	1448.86	2.18888	2.44867	275	81	501.223	691.472	-0.863659	-3.07806	1271	1252	290.227	386.179	2.12688	1.69431	1	0	0	0.0002	SCER	NA	NA	NA	LOW_COV	0.0226	SCER	NA	NA	NA	LOW_COV	0.000334064	NA	0.0244927	NA
Scer_12.447	Spar_12.404	YLR285W	S000004275	NNT1	658	658	29771	33230	26710.8	27344	0.156479	0.281251	22026	31168	19477.1	29869.6	0.177418	0.0613855	17185	11558	15625.6	10828.7	0.137226	0.0940237	18831	19087	11788.3	13160.1	0.675706	0.536385	1	1	1	0.0002	SCER	NA	0.824	SPAR	NA	NA	NA	REPS_DISAGREE	0.1304	SCER	NA	0.000334064	0.873492	NA	0.223756
Scer_12.449	Spar_12.405	YLR286C	S000004276	CTS1	1282	1280	73707	79489	72064.9	67490.2	0.0302517	0.233822	232369	320900	21508.2	24141.1	3.43115	3.73025	56286	46207	61060.4	40891.6	-0.119711	0.17405	415534	423413	15975.3	18441.9	4.69872	4.51868	1	1	0	0.2892	SCER	NA	0.4826	SPAR	NA	0.0002	SCER	NA	0.0002	SCER	NA	0.329628	0.581561	0.000243994	0.000633882
Scer_12.45	Spar_12.25	YLL041C	S000003964	SDH2	501	501	13788	11674	9370.75	10582.9	0.557127	0.141551	9680	14583	9094.18	10971.7	0.0900543	0.41047	8963	6260	7410.43	6241.39	0.274391	0.00429374	8410	8098	9609.49	8949.26	-0.192332	-0.144186	1	1	1	0.117	SCER	NA	0.235	SPAR	NA	NA	NA	REPS_DISAGREE	0.2136	SPAR	NA	0.140576	0.324635	NA	0.337897
Scer_12.450	Spar_12.406	YLR287C	S000004277	NA	965	965	32406	31691	24380	25794.8	0.410547	0.296985	18228	27100	16952.4	25516.1	0.10466	0.0868794	10639	6678	9491.97	4449.21	0.164567	0.585759	9877	7852	8194.63	9666.57	0.269364	-0.299909	1	1	1	0.0002	SCER	NA	NA	NA	REPS_DISAGREE	0.0002	SPAR	NA	0.0152	SPAR	NA	0.000334064	NA	0.000243994	0.0334003
Scer_12.452	Spar_12.408	YLR288C	S000004279	MEC3	1124	1121	7745	9347	6731.51	6511.71	0.198452	0.517543	6948	12062	7158.42	10721.8	-0.0468924	0.166057	1563	832	1645.87	1456.53	-0.0783381	-0.81099	2006	1824	1378.58	1616.03	0.53696	0.170695	1	0	0	0.0002	SCER	NA	NA	NA	LOW_COV	0.0004	SPAR	NA	NA	NA	LOW_COV	0.000334064	NA	0.000478845	NA
Scer_12.453	Spar_12.409	YLR289W	S000004280	GUF1	1490	1490	9612	6822	10670	12872.6	-0.150642	-0.915934	5319	7270	8719.15	11882.9	-0.712927	-0.708784	2349	2293	3050.7	1138.01	-0.376953	1.01009	1569	2024	2691	3903.49	-0.777913	-0.947214	1	1	1	0.0002	SPAR	NA	NA	NA	REPS_DISAGREE	NA	NA	REPS_DISAGREE	0.0988	SPAR	NA	0.000334064	NA	NA	0.176855
Scer_12.454	Spar_12.410	YLR290C	S000004281	NA	641	641	6152	6960	3376.17	6039.29	0.865476	0.204677	9265	12728	2266.62	4707.3	2.03077	1.43484	2419	2472	1089.18	590.675	1.15045	2.06339	3861	2846	1521.56	2489.31	1.34285	0.193116	1	1	1	0.0266	SCER	NA	0.0012	SCER	NA	0.0002	SCER	NA	0.0002	SPAR	NA	0.034968	0.00329234	0.000243994	0.000633882
Scer_12.455	Spar_12.411	YLR291C	S000004282	GCD7	876	876	61259	53814	37414.6	42936	0.711307	0.325786	36861	50188	25962.6	37375	0.505645	0.425259	27008	19501	20481.5	12043.3	0.399045	0.69527	26639	21899	22362.4	23717.1	0.252456	-0.115055	1	1	1	0.0002	SCER	NA	NA	NA	REPS_DISAGREE	NA	NA	REPS_DISAGREE	0.0002	SPAR	NA	0.000334064	NA	NA	0.000633882
Scer_12.456	Spar_12.412	YLR292C	S000004283	SEC72	475	475	26341	22516	24285.8	22733.9	0.117193	-0.0138959	20314	28588	15141.4	26064.9	0.423954	0.133294	11301	6879	11620.9	8609.13	-0.0402679	-0.323627	12767	11192	18749.5	16095.2	-0.554396	-0.524127	1	1	1	NA	NA	REPS_DISAGREE	0.0196	SPAR	NA	0.0156	SCER	NA	0.8572	SPAR	NA	NA	0.0377168	0.017112	0.956231
Scer_12.457	Spar_12.413	YLR293C	S000004284	GSP1	176	208	115763	112944	141834	144011	-0.0520163	-0.10956	70625	103128	100052	169717	-0.261478	-0.477682	109625	96104	156276	128928	-0.270503	-0.182889	118527	121083	139595	154644	0.00498148	-0.111942	1	1	1	0.314	SPAR	NA	0.504	SPAR	NA	0.0004	SPAR	NA	0.0004	SCER	NA	0.355698	0.600181	0.000478845	0.00118809
Scer_12.459	Spar_12.415	YLR295C	S000004286	ATP14	336	336	29442	23909	32474.3	27545.5	-0.141418	-0.204255	15639	24679	24143.7	33842.6	-0.626468	-0.455541	29794	24302	39753.9	24228.7	-0.416063	0.00435526	23462	21925	48811.4	39891.1	-1.05686	-0.863461	1	1	1	0.0016	SPAR	NA	NA	NA	REPS_DISAGREE	0.0002	SPAR	NA	0.7888	SPAR	NA	0.00241273	NA	0.000243994	0.912402
Scer_12.461	Spar_12.417	YLR297W	S000004288	NA	356	356	1585	1217	1131.67	1923.44	0.485664	-0.659926	1081	1828	6464.66	6878.45	-2.5791	-1.91124	898	997	552.656	314.489	0.699332	1.66145	1213	1274	3693.99	2839.21	-1.6058	-1.1555	0	0	0	NA	NA	NA	NA	NA	NA	NA	NA	NA	NA	NA	NA	NA	NA	NA	NA
Scer_12.462	Spar_12.418	YLR298C	S000004289	YHC1	468	468	8154	9363	9876.58	12481.5	-0.276473	-0.414713	7426	11811	8214.21	12898.9	-0.145517	-0.127109	3855	1733	4099.54	2176.22	-0.0887077	-0.328385	3068	3461	4483.57	4578.26	-0.547202	-0.40351	1	1	1	0.0002	SPAR	NA	0.5504	SCER	NA	0.0004	SCER	NA	0.0194	SPAR	NA	0.000334064	0.641779	0.000478845	0.0413805
Scer_12.463	Spar_12.419	YLR299W	S000004290	ECM38	1638	1638	6933	5804	8932.36	7389.07	-0.365516	-0.348293	10187	14389	6478.52	9585.52	0.652912	0.585988	3228	1387	3388.55	3168.07	-0.070005	-1.19105	8675	10142	7279.14	7274.84	0.253064	0.479298	1	1	1	0.0008	SPAR	NA	NA	NA	REPS_DISAGREE	0.0002	SCER	NA	0.0042	SCER	NA	0.00124769	NA	0.000243994	0.0102304
Scer_12.464	Spar_12.420	YLR300W	S000004291	EXG1	807	807	69726	65219	133172	135029	-0.933514	-1.04989	64382	78629	186237	234231	-1.53239	-1.57479	49710	30898	75181.4	52249.5	-0.596829	-0.757885	148548	149241	171972	156670	-0.211243	-0.0700828	1	1	1	0.0002	SPAR	NA	0.0004	SCER	NA	0.0002	SPAR	NA	0.0002	SCER	NA	0.000334064	0.00125798	0.000243994	0.000633882
Scer_12.465	Spar_12.421	YLR301W	S000004292	HRI1	576	576	47507	33043	43718.6	33335.7	0.11989	-0.0127223	43704	71302	35171.1	55879.6	0.313368	0.351616	29974	16306	31096	14070.4	-0.0530142	0.212731	46451	40583	31677.4	34350.7	0.552242	0.240528	1	1	1	NA	NA	REPS_DISAGREE	NA	NA	REPS_DISAGREE	0.0002	SCER	NA	NA	NA	REPS_DISAGREE	NA	NA	0.000243994	NA
Scer_12.47	Spar_12.28	YLL039C	S000003962	UBI4	510	351	25747	31071	16085.4	19604.6	0.139593	0.125322	24312	36524	16348.7	21492.5	0.0334347	0.225959	10134	6134	4108.61	2884.83	0.763245	0.549051	18388	30280	17140.4	14881.2	-0.437671	0.485795	1	1	1	0.0682	SCER	NA	0.0018	SCER	NA	NA	NA	REPS_DISAGREE	0.0484	SPAR	NA	0.0846704	0.00463725	NA	0.093873
Scer_12.470	Spar_12.424	YLR303W	S000004294	MET17	782	782	18753	13231	16489.1	11364	0.185601	0.219435	22802	33382	4200.64	5605.65	2.4402	2.5739	30821	11567	23222.6	9370.15	0.408366	0.303841	66882	60454	15083.2	13044.6	2.1486	2.2123	1	1	1	0.0014	SCER	NA	0.5272	SCER	NA	0.0002	SCER	NA	0.0002	SPAR	NA	0.00212301	0.620312	0.000243994	0.000633882
Scer_12.474	Spar_12.429	NA	NA	NA	1283	1283	100138	97316	58661.4	65114.2	0.771496	0.579698	68923	117821	135536	170887	-0.97561	-0.536441	103659	60992	66103.9	45764.2	0.64903	0.414394	156368	199187	292512	288963	-0.903547	-0.53676	1	1	1	0.0002	SCER	NA	0.1026	SPAR	NA	0.0002	SPAR	NA	0.9172	SPAR	NA	0.000334064	0.161874	0.000243994	0.983337
Scer_12.475	Spar_12.430	YLR305C	S000004296	STT4	4398	4398	53104	66052	60207.7	63475.6	-0.181123	0.0574001	23440	28654	22587.3	28893.1	0.053456	-0.0119881	13809	7639	20431.1	15962.3	-0.565126	-1.06312	26933	17746	20377.7	26454.5	0.402363	-0.575993	1	1	1	NA	NA	REPS_DISAGREE	0.0002	SPAR	NA	NA	NA	REPS_DISAGREE	0.0002	SCER	NA	NA	0.000685507	NA	0.000633882
Scer_12.477	Spar_12.432	YLR307W	S000004298	CDA1	764	764	327	261	5546.28	5009.09	-4.08001	-4.2572	517	595	6747.01	10287.2	-3.70344	-4.10953	0	0	2863.12	1020.07	-11.4839	-9.99587	151	114	3770.81	3838.85	-4.63311	-5.06135	1	0	0	0.0002	SPAR	NA	NA	NA	LOW_COV	NA	NA	REPS_DISAGREE	NA	NA	LOW_COV	0.000334064	NA	NA	NA
Scer_12.479	Spar_12.434	YLR308W	S000004299	CDA2	714	714	89	112	26.7792	59.5493	1.69592	0.900141	0	0	172.356	127.108	-7.4376	-7.00122	145	0	0	0	7.18982	0	0	0	59.7525	60.4708	-5.92487	-5.94183	0	0	0	NA	NA	NA	NA	NA	NA	NA	NA	NA	NA	NA	NA	NA	NA	NA	NA
Scer_12.48	Spar_12.29	YLL038C	S000003961	ENT4	446	446	4866	3937	4267.82	6538.51	0.189196	-0.73172	2081	2506	2400.86	2519.84	-0.206184	-0.00794088	3093	1740	2227.77	1386.98	0.473227	0.326933	3047	3968	3973.54	2710.76	-0.382926	0.549546	1	1	1	NA	NA	REPS_DISAGREE	0.0006	SCER	NA	NA	NA	REPS_DISAGREE	NA	NA	REPS_DISAGREE	NA	0.00177375	NA	NA
Scer_12.480	Spar_12.435	YLR309C	S000004300	IMH1	2358	2364	55696	58562	39848.5	44895.2	0.486704	0.387063	33190	36014	21391.2	30323.9	0.637371	0.25176	10997	6214	7466.91	4986.46	0.562132	0.321115	12920	10267	12851.1	15065.6	0.0113843	-0.549529	1	1	1	0.0002	SCER	NA	NA	NA	REPS_DISAGREE	NA	NA	REPS_DISAGREE	0.0002	SPAR	NA	0.000334064	NA	NA	0.000633882
Scer_12.481	Spar_12.436	YLR310C	S000004301	CDC25	3452	3449	42392	50483	32254.1	39517.9	0.393044	0.352029	20189	24874	15386.5	18128.4	0.390629	0.455111	5720	5141	5952.14	4776.8	-0.0586388	0.104728	10566	8826	8950.07	10697.1	0.238179	-0.27861	1	1	1	0.0002	SCER	NA	0.0132	SPAR	NA	NA	NA	REPS_DISAGREE	0.6066	SPAR	NA	0.000334064	0.0266365	NA	0.766142
Scer_12.483	Spar_12.438	YLR312C	S000004303	NA	933	933	694	1488	2038.2	959.736	-1.55292	0.632132	1598	2204	1727.03	1580.27	-0.111956	0.479699	40	0	271.285	64.5105	-2.73142	-6.03365	148	233	554.845	634.318	-1.89937	-1.44097	0	0	0	NA	NA	NA	NA	NA	NA	NA	NA	NA	NA	NA	NA	NA	NA	NA	NA
Scer_12.487	Spar_12.442	YLR314C	S000004306	CDC3	1006	994	61380	70986	60368.3	63951	0.00666361	0.133254	46385	54095	34785.7	51248.7	0.397843	0.0606655	38430	23938	37298.2	25214.5	0.0258125	-0.0922631	46659	54239	37516	39101.2	0.297327	0.454793	1	1	1	0.8336	SCER	NA	NA	NA	REPS_DISAGREE	NA	NA	REPS_DISAGREE	0.6304	SCER	NA	0.856566	NA	NA	0.786613
Scer_12.488	Spar_12.443	YLR315W	S000004307	NKP2	352	352	2355	2556	2769.17	2513.97	-0.233636	0.0239098	2430	3473	2393.93	3310.83	0.0215641	0.0689696	1673	168	1922.19	1835.53	-0.200204	-3.44188	3062	3187	2577.89	2278.71	0.248193	0.483804	1	0	0	NA	NA	REPS_DISAGREE	NA	NA	LOW_COV	NA	NA	REPS_DISAGREE	NA	NA	LOW_COV	NA	NA	NA	NA
Scer_12.49	Spar_12.31	YLL036C	S000003959	PRP19	1348	1348	29956	28918	28765.9	22540.4	0.0584853	0.359441	18420	26486	19320.4	24671	-0.0688455	0.102407	11370	6389	7338.83	5018.72	0.631541	0.34821	10520	8428	9526.26	12024.1	0.143139	-0.512615	1	1	1	0.0466	SCER	NA	NA	NA	REPS_DISAGREE	NA	NA	REPS_DISAGREE	0.0016	SPAR	NA	0.0589392	NA	NA	0.00425929
Scer_12.491	Spar_12.445	YLR318W	S000004310	EST2	2178	2154	7732	7445	9409.43	10945.2	-0.299218	-0.571873	6115	8732	5846.26	7095.74	0.0488428	0.283336	237	375	901.596	778.158	-1.9391	-1.06717	725	269	943.236	907.062	-0.395164	-1.76582	1	0	0	0.0002	SPAR	NA	NA	NA	LOW_COV	0.0002	SCER	NA	NA	NA	LOW_COV	0.000334064	NA	0.000243994	NA
Scer_12.492	Spar_12.446	YLR319C	S000004311	BUD6	2066	2066	22931	25208	20540.7	22351.8	0.158809	0.173482	15105	18595	13492.3	17373.5	0.162879	0.0980227	6528	2479	8314.04	6147.65	-0.348861	-1.30993	7114	6968	8693.99	8700.7	-0.289321	-0.320346	1	1	1	0.0004	SCER	NA	0.0002	SPAR	NA	NA	NA	REPS_DISAGREE	0.0012	SCER	NA	0.000643008	0.000685507	NA	0.00326876
Scer_12.493	Spar_12.447	YLR320W	S000004312	MMS22	3925	3931	16237	17302	16842.2	21081.4	-0.050585	-0.282816	6450	6938	10328.4	11432	-0.676956	-0.718203	759	921	991.352	1568.41	-0.382648	-0.765182	1181	1077	1931.29	2150.26	-0.706876	-0.99462	1	0	0	0.0258	SPAR	NA	NA	NA	LOW_COV	0.0002	SPAR	NA	NA	NA	LOW_COV	0.0339418	NA	0.000243994	NA
Scer_12.494	Spar_12.448	YLR321C	S000004313	SFH1	930	933	19123	24875	23537	28767.3	-0.294959	-0.205077	17419	21192	11833.7	18027.9	0.562369	0.237922	12005	8523	11841.8	8137.4	0.0243964	0.071432	14430	15831	8687.59	9016.4	0.736624	0.816706	1	1	1	0.0002	SPAR	NA	0.0016	SCER	NA	0.0002	SCER	NA	0.0002	SCER	NA	0.000334064	0.00418584	0.000243994	0.000633882
Scer_12.495	Spar_12.449	YLR323C	S000004315	CWC24	663	663	7574	9282	7743.17	7529.01	-0.0318642	0.301939	5601	8006	3991.04	5827.23	0.488814	0.458204	3057	2940	3106.17	2131.87	-0.0230118	0.46351	2545	3241	2349.55	2454.28	0.115231	0.400997	1	1	1	NA	NA	REPS_DISAGREE	0.9432	SCER	NA	0.017	SCER	NA	0.0002	SPAR	NA	NA	0.961909	0.0185945	0.000633882
Scer_12.496	Spar_12.450	YLR324W	S000004316	PEX30	1198	1198	13557	14076	9840.87	10845.9	0.462139	0.376056	14258	18242	8351.92	11293.7	0.77152	0.691691	5728	3678	3571.08	2299.2	0.681517	0.677557	9907	10224	5281.7	4949.85	0.907319	1.04635	1	1	1	0.0002	SCER	NA	0.0084	SCER	NA	0.0002	SCER	NA	0.1404	SPAR	NA	0.000334064	0.0179946	0.000243994	0.238786
Scer_12.498	Spar_12.452	YLR326W	S000004318	NA	623	626	5687	2675	14551	14700.7	-1.3483	-2.45091	6418	9617	12326.5	19373.7	-0.93453	-1.00344	2074	738	2228.78	1831.49	-0.0968572	-1.30323	3731	3850	4583.87	4656.25	-0.290002	-0.267315	1	0	0	0.0002	SPAR	NA	NA	NA	LOW_COV	0.0002	SCER	NA	NA	NA	LOW_COV	0.000334064	NA	0.000243994	NA
Scer_12.50	Spar_12.32	YLL035W	S000003958	GRC3	1661	1655	20931	27577	23102.5	20063.1	-0.147625	0.453677	8603	10224	15557.1	19480.2	-0.859808	-0.935204	5395	3685	3839.34	2954.38	0.485434	0.313491	5059	3444	6060.61	6756.05	-0.265785	-0.97711	1	1	1	NA	NA	REPS_DISAGREE	NA	NA	REPS_DISAGREE	0.0002	SPAR	NA	NA	NA	REPS_DISAGREE	NA	NA	0.000243994	NA
Scer_12.501	Spar_12.457	YLR328W	S000004320	NMA1	736	742	26307	27398	20908.6	21913.1	0.343047	0.333974	16839	23850	10816.9	14940.4	0.650189	0.686449	11149	6802	7226.88	7104.22	0.637112	-0.0509952	9701	8362	5025.61	4651.25	0.960409	0.857807	1	1	1	0.0002	SCER	NA	NA	NA	REPS_DISAGREE	0.0002	SCER	NA	0.581	SPAR	NA	0.000334064	NA	0.000243994	0.743472
Scer_12.503	Spar_12.459	YLR330W	S000004322	CHS5	1657	1188	69254	88208	43509.3	61002.3	0.190522	0.0520003	60122	70722	27180.3	39923.2	0.665262	0.344878	17221	13654	14109.9	9357.05	-0.192593	0.0651106	27381	21842	29251	29422.6	-0.575346	-0.909841	1	1	1	0.1374	SCER	NA	NA	NA	REPS_DISAGREE	0.0002	SCER	NA	0.0098	SPAR	NA	0.163407	NA	0.000243994	0.0223929
Scer_12.504	Spar_12.461	YLR332W	S000004324	MID2	950	971	26245	31295	26354.7	29941.4	0.0255243	0.0953333	16791	24982	34856.7	36635.5	-1.02216	-0.520793	16273	10403	16832.8	7651.55	-0.0172489	0.474669	20682	20034	29398.2	23996.5	-0.47579	-0.228816	1	1	1	0.4228	SCER	NA	NA	NA	REPS_DISAGREE	0.0002	SPAR	NA	0.2866	SCER	NA	0.467172	NA	0.000243994	0.432307
Scer_12.508	Spar_12.465	YLR333C	S000004325	RPS25B	151	169	133360	135719	88629.4	79530	0.751939	0.933518	97178	181319	56713	88394.4	0.939414	1.19897	114742	78529	56425.4	37876.8	1.18644	1.21437	100460	158327	38275.8	39886.1	1.55457	2.1514	1	1	1	0.0002	SCER	NA	0.0634	SCER	NA	0.2534	SCER	NA	0.4406	SPAR	NA	0.000334064	0.105891	0.259492	0.602832
Scer_12.511	Spar_12.467	YLR335W	S000004327	NUP2	2077	2086	91170	112852	91115.9	96702.1	0.00709485	0.229049	54898	68143	42675.9	54856.7	0.369561	0.31913	59000	39169	53121.5	30509.4	0.157654	0.366684	67696	50573	67469.1	67351.5	0.0110808	-0.407098	1	1	1	0.7496	SCER	NA	0.0088	SCER	NA	0.0002	SCER	NA	0.0002	SPAR	NA	0.781939	0.0187327	0.000243994	0.000633882
Scer_12.512	Spar_12.468	YLR336C	S000004328	SGD1	2215	2215	47344	53585	43985.4	53441.5	0.106155	0.00386844	16955	20817	23088.8	34030.7	-0.445461	-0.709047	18103	11680	19192.7	11446.6	-0.0843235	0.0291202	12200	10730	15002.2	20333.6	-0.298266	-0.922153	1	1	1	0.9116	SCER	NA	NA	NA	REPS_DISAGREE	0.0002	SPAR	NA	NA	NA	REPS_DISAGREE	0.924789	NA	0.000243994	NA
Scer_12.513	Spar_12.469	YLR337C	S000004329	VRP1	2249	2282	40980	41891	45924.4	50349.9	-0.143322	-0.244328	15613	24054	18247.2	18293.3	-0.203903	0.415958	45778	40299	57523.6	43570.8	-0.308478	-0.0916002	61756	81340	125677	81348.6	-1.00404	0.0208619	1	1	1	0.0002	SPAR	NA	NA	NA	REPS_DISAGREE	NA	NA	REPS_DISAGREE	NA	NA	REPS_DISAGREE	0.000334064	NA	NA	NA
Scer_12.514	Spar_12.470	YLR340W	S000004332	RPP0	263	263	631018	501465	680893	546913	-0.109747	-0.125163	344580	586745	415125	584366	-0.268706	0.00586135	475651	252020	463432	341808	0.0375451	-0.439647	483857	616657	432854	361896	0.160701	0.768893	1	1	1	0.0296	SPAR	NA	NA	NA	REPS_DISAGREE	NA	NA	REPS_DISAGREE	0.6662	SCER	NA	0.0386365	NA	NA	0.820266
Scer_12.515	Spar_12.471	YLR341W	S000004333	SPO77	1303	1297	465	857	735.933	1438.12	-0.667862	-0.752791	220	71	472.031	486.104	-1.10455	-2.76482	0	0	0	29.2313	-0.0066586	-4.92463	0	11	0	54.6322	-0.0066586	-2.21955	0	0	0	NA	NA	NA	NA	NA	NA	NA	NA	NA	NA	NA	NA	NA	NA	NA	NA
Scer_12.516	Spar_12.472	NA	NA	NA	3931	3996	283449	324091	233174	245135	0.305343	0.426484	94984	104521	123058	132441	-0.349919	-0.317893	194742	157281	145000	105328	0.449173	0.602117	308530	237612	218419	268225	0.521971	-0.151178	1	1	1	0.0002	SCER	NA	0.004	SCER	NA	0.0002	SPAR	NA	NA	NA	REPS_DISAGREE	0.000334064	0.00935707	0.000243994	NA
Scer_12.518	Spar_12.474	YLR343W	S000004335	GAS2	1337	1337	1753	2637	1431.2	1656.46	0.292414	0.670468	799	782	1296.57	1968.46	-0.69774	-1.33072	0	56	317.676	197.563	-8.31595	-1.80057	0	0	185.66	399.941	-7.54427	-8.64725	1	0	0	0.0104	SCER	NA	NA	NA	LOW_COV	NA	NA	LOW_COV	NA	NA	LOW_COV	0.0142934	NA	NA	NA
Scer_12.52	Spar_12.35	YLL033W	S000003956	IRC19	526	529	3979	4332	5521.48	4083.1	-0.464344	0.0935546	3708	5981	3255.72	5516.33	0.195818	0.124862	684	764	1016.56	354.808	-0.562739	1.11257	940	690	1384.98	1782.85	-0.550433	-1.36003	1	0	0	NA	NA	REPS_DISAGREE	NA	NA	LOW_COV	0.5018	SCER	NA	NA	NA	LOW_COV	NA	NA	0.505094	NA
Scer_12.523	Spar_12.483	YLR345W	S000004337	NA	1017	1017	10278	13996	9536.38	11002.7	0.108034	0.347126	14432	21436	7362.82	9078.8	0.970845	1.23937	1978	1424	1223.31	1247.88	0.692808	0.190332	3333	2985	1073.41	1963.01	1.63371	0.604414	1	0	0	0.0016	SCER	NA	NA	NA	LOW_COV	0.0002	SCER	NA	NA	NA	LOW_COV	0.00241273	NA	0.000243994	NA
Scer_12.524	Spar_12.484	YLR346C	S000004338	NA	271	271	19851	13908	47209.8	37489.2	-1.24983	-1.4305	4905	9725	47263.7	70706.6	-3.26815	-2.86195	3097	1070	11613.8	3262.82	-1.90656	-1.6076	901	1405	10017.1	11874	-3.47334	-3.07825	1	1	1	0.0002	SPAR	NA	0.5136	SPAR	NA	0.0002	SPAR	NA	0.0002	SCER	NA	0.000334064	0.609771	0.000243994	0.000633882
Scer_12.525	Spar_12.485	YLR347C	S000004339	KAP95	1647	1647	67552	59271	64275.1	53123.9	0.0717367	0.157962	22291	27042	30952.2	29298.5	-0.473565	-0.11562	44876	27164	42331.6	24320.5	0.0842063	0.159519	49139	38519	61103.4	66848.6	-0.314377	-0.795311	1	1	1	0.002	SCER	NA	0.985	SCER	NA	0.0002	SPAR	NA	0.7396	SPAR	NA	0.00298892	0.992333	0.000243994	0.877237
Scer_12.526	Spar_12.486	YLR348C	S000004340	DIC1	577	577	15081	18698	15156.1	18400.7	-0.00716193	0.02312	11998	20093	10199.3	16375.5	0.234297	0.295137	6077	3658	5668.76	4006.71	0.10031	-0.131328	8073	8358	7601.37	7520.48	0.0868334	0.152314	1	1	1	NA	NA	REPS_DISAGREE	NA	NA	REPS_DISAGREE	0.0002	SCER	NA	0.3728	SPAR	NA	NA	NA	0.000243994	0.529706
Scer_12.527	Spar_12.488	YLR350W	S000004342	ORM2	506	506	24059	27611	31065.9	32639	-0.368742	-0.241344	15107	26500	17401.1	24281.1	-0.203945	0.126152	15488	8184	18125.7	14469.5	-0.226872	-0.822061	18719	21563	23664.1	19054.1	-0.338183	0.178445	1	1	1	0.0002	SPAR	NA	NA	NA	REPS_DISAGREE	0.0086	SCER	NA	0.098	SCER	NA	0.000334064	NA	0.00958786	0.175657
Scer_12.528	Spar_12.489	YLR351C	S000004343	NIT3	685	685	33107	29272	33722	24332.8	-0.0265532	0.266607	35225	55853	22898.3	37027.2	0.621339	0.593037	13397	10266	18495.8	13747.8	-0.465259	-0.421291	24314	22755	23623.6	21510.5	0.0415575	0.0811387	1	1	1	NA	NA	REPS_DISAGREE	0.0002	SPAR	NA	0.0002	SCER	NA	0.0574	SPAR	NA	NA	0.000685507	0.000243994	0.108822
Scer_12.529	Spar_12.490	YLR352W	S000004344	NA	1904	1907	10601	14683	18388.4	24435.1	-0.792267	-0.732495	8286	10688	11911.6	13362.7	-0.5213	-0.319921	2192	2172	4303.25	3604.53	-0.970586	-0.72825	3650	3183	5497.23	5003.64	-0.588405	-0.650156	1	1	1	0.0002	SPAR	NA	NA	NA	REPS_DISAGREE	0.0002	SCER	NA	0.0002	SCER	NA	0.000334064	NA	0.000243994	0.000633882
Scer_12.53	Spar_12.36	YLL032C	S000003955	NA	2137	2134	16806	22391	19124.3	21757.3	-0.18845	0.0393894	10803	13709	14894.5	19511.1	-0.465341	-0.51117	4848	2506	5362.17	4291.97	-0.147426	-0.77804	5976	4794	7215.12	9097.73	-0.273828	-0.92616	1	1	1	NA	NA	REPS_DISAGREE	NA	NA	REPS_DISAGREE	0.0002	SPAR	NA	NA	NA	REPS_DISAGREE	NA	NA	0.000243994	NA
Scer_12.530	Spar_12.491	YLR353W	S000004345	BUD8	1441	1441	13534	20088	14873.4	15238.7	-0.136135	0.398575	10415	12907	16484.7	21806.8	-0.662415	-0.756579	1372	923	1490.56	1576.48	-0.119488	-0.771653	2655	1881	3634.23	3156.58	-0.452793	-0.74655	1	0	0	NA	NA	REPS_DISAGREE	NA	NA	LOW_COV	0.0002	SPAR	NA	NA	NA	LOW_COV	NA	NA	0.000243994	NA
Scer_12.531	Spar_12.492	YLR354C	S000004346	TAL1	545	545	128830	116981	87702	77482.5	0.554782	0.594325	100227	143050	59379.8	87576.8	0.755218	0.707893	114830	53474	87218.8	53521.6	0.396785	-0.00128266	151373	149893	105009	93583.8	0.527595	0.679597	1	1	1	0.0002	SCER	NA	0.0398	SPAR	NA	0.0006	SCER	NA	0.0002	SPAR	NA	0.000334064	0.070719	0.000712427	0.000633882
Scer_12.532	Spar_12.493	YLR355C	S000004347	ILV5	150	150	85995	108062	82346.2	93984.6	0.0625507	0.20136	35259	42896	68474	98436	-0.957544	-1.19832	113213	77601	131716	93581.6	-0.218385	-0.270146	106073	113373	154029	167384	-0.538142	-0.562084	1	1	1	0.4658	SCER	NA	0.0782	SPAR	NA	0.0002	SPAR	NA	0.0002	SCER	NA	0.510661	0.127371	0.000243994	0.000633882
Scer_12.533	Spar_12.494	YLR356W	S000004348	ATG33	394	394	3377	3667	2379.38	1731.89	0.504974	1.08181	4891	9380	1619.63	1933.25	1.59387	2.27797	2054	1704	2317.52	1221.67	-0.174068	0.479739	6003	4253	2161.76	2217.82	1.47305	0.939028	1	0	0	0.0002	SCER	NA	NA	NA	LOW_COV	0.0002	SCER	NA	NA	NA	LOW_COV	0.000334064	NA	0.000243994	NA
Scer_12.534	Spar_12.495	YLR357W	S000004349	RSC2	1825	1828	33426	42523	29431.4	38607.8	0.18598	0.141718	18771	22540	13784.2	15504.6	0.447834	0.542128	14338	13625	10588.2	8047.69	0.43972	0.761906	12809	15794	9218.96	9568.98	0.476808	0.72525	1	1	1	0.0002	SCER	NA	0.0002	SCER	NA	0.0002	SCER	NA	0.0008	SPAR	NA	0.000334064	0.000685507	0.000243994	0.00225204
Scer_12.535	Spar_12.496	YLR359W	S000004351	ADE13	1073	1073	199438	194642	168751	159458	0.241044	0.287644	159438	193477	73388.3	97178.6	1.11936	0.993444	116468	63533	104746	77902.5	0.153031	-0.29416	162167	139476	105423	112329	0.62129	0.31228	1	1	1	0.0002	SCER	NA	0.1232	SPAR	NA	0.0002	SCER	NA	0.0002	SPAR	NA	0.000334064	0.187737	0.000243994	0.000633882
Scer_12.536	Spar_12.497	YLR360W	S000004352	VPS38	1115	1115	11111	10849	10786.1	13700.3	0.0428138	-0.336618	13085	18258	9695.26	13312.9	0.432524	0.455677	1119	1786	2261.05	2824.35	-1.01413	-0.660891	2938	1544	2298.34	2140.67	0.354107	-0.471127	1	1	1	NA	NA	REPS_DISAGREE	0.034	SPAR	NA	0.0002	SCER	NA	NA	NA	REPS_DISAGREE	NA	0.0614286	0.000243994	NA
Scer_12.537	Spar_12.498	YLR361C	S000004353	DCR2	1583	1583	16271	14466	12403.7	16130.9	0.391499	-0.157151	11511	14093	8022.8	10494.2	0.520782	0.425356	4522	3152	3364.34	1743.8	0.426526	0.853663	7884	5131	4112.25	5164.21	0.938831	-0.00930454	1	1	1	NA	NA	REPS_DISAGREE	0.7132	SCER	NA	0.0048	SCER	NA	0.008	SPAR	NA	NA	0.784155	0.00543634	0.0185633
Scer_12.539	Spar_12.500	YLR362W	S000004354	STE11	1742	1778	13632	15847	11998.1	10540.2	0.213689	0.617769	9686	11476	8951.27	12286.6	0.143307	-0.0689431	4203	3029	3847.41	3168.07	0.15701	-0.0352319	4284	4647	4790.87	5410.26	-0.131783	-0.189844	1	1	1	0.0002	SCER	NA	0.415	SPAR	NA	0.0002	SPAR	NA	0.9754	SPAR	NA	0.000334064	0.51521	0.000243994	1
Scer_12.54	Spar_12.37	YLL031C	S000003954	GPI13	2236	2236	33879	42331	33685.3	34010.6	0.00827161	0.315723	20345	26731	15934.7	20884.4	0.35248	0.356072	9361	5651	11809.5	6591.16	-0.33518	-0.22199	18533	12714	9780.21	13853.6	0.92209	-0.123839	1	1	1	0.7266	SCER	NA	0.0002	SPAR	NA	0.3088	SCER	NA	NA	NA	REPS_DISAGREE	0.760436	0.000685507	0.314439	NA
Scer_12.540	Spar_12.501	YLR363C	S000004355	NMD4	542	542	13964	14163	14829.7	18918.8	-0.0867757	-0.417669	10212	14904	9235.35	16149.6	0.145011	-0.115794	3045	3030	3178.78	2926.16	-0.0620109	0.0502936	3476	3504	3132.74	4099.92	0.149958	-0.226533	1	1	1	0.0166	SPAR	NA	0.8072	SCER	NA	NA	NA	REPS_DISAGREE	NA	NA	REPS_DISAGREE	0.0222391	0.86031	NA	NA
Scer_12.541	Spar_12.502	YLR363W-A	S000007620	NA	188	188	7970	10454	4730.01	5644.28	0.752613	0.889076	3414	5568	3015.8	5341.13	0.178865	0.060004	6704	7587	5050.55	3048.12	0.408512	1.31533	5031	6483	3521.13	5551.64	0.514683	0.223711	1	1	1	0.0002	SCER	NA	NA	NA	REPS_DISAGREE	0.0002	SPAR	NA	0.0088	SPAR	NA	0.000334064	NA	0.000243994	0.0203495
Scer_12.542	Spar_12.503	YLR364W	S000004356	GRX8	290	290	3357	2069	5658.35	3432.02	-0.753035	-0.729849	2989	4490	3328.47	5201.99	-0.155147	-0.212306	1608	918	4971.89	1713.56	-1.62792	-0.899702	1500	1023	5375.59	3956.04	-1.84077	-1.95021	1	0	0	0.0002	SPAR	NA	NA	NA	LOW_COV	0.0002	SCER	NA	NA	NA	LOW_COV	0.000334064	NA	0.000243994	NA
Scer_12.546	Spar_12.505	YLR368W	S000004360	MDM30	1504	1504	15669	14993	18230.7	18318.4	-0.218445	-0.288983	12896	18397	13277.5	16808.4	-0.0420565	0.130284	1819	2114	1359.45	1178.33	0.419852	0.842696	1702	1315	1739.23	1765.75	-0.0311956	-0.424936	1	1	1	0.0002	SPAR	NA	0.0002	SCER	NA	0.0002	SCER	NA	0.0012	SPAR	NA	0.000334064	0.000685507	0.000243994	0.00326876
Scer_12.547	Spar_12.506	YLR369W	S000004361	SSQ1	1693	1693	20870	22372	29601	32554.6	-0.504194	-0.541147	15186	20674	19159.3	27595.4	-0.335281	-0.416592	7592	5295	9826.79	7901.53	-0.372196	-0.577412	7563	8019	11459.7	12356.1	-0.599471	-0.623661	1	1	1	0.0002	SPAR	NA	NA	NA	REPS_DISAGREE	0.0002	SCER	NA	0.0002	SCER	NA	0.000334064	NA	0.000243994	0.000633882
Scer_12.548	Spar_12.507	YLR370C	S000004362	ARC18	374	374	21330	20906	22017.5	16507.1	-0.0457641	0.340815	23278	40849	22382.9	32915	0.0565654	0.311545	12788	9682	13480.6	5411.83	-0.0760848	0.839071	19022	21681	19609.5	17930.2	-0.0438814	0.274025	1	1	1	NA	NA	REPS_DISAGREE	NA	NA	REPS_DISAGREE	NA	NA	REPS_DISAGREE	0.7194	SPAR	NA	NA	NA	NA	0.864435
Scer_12.549	Spar_12.508	NA	NA	NA	2816	2809	26386	29927	32998	40266.2	-0.326184	-0.431701	15730	17833	17054.6	19922.5	-0.120227	-0.163433	4877	5184	7029.22	3400.91	-0.53087	0.604406	7617	6838	8661.98	8112.68	-0.189042	-0.250161	1	1	1	0.0002	SPAR	NA	NA	NA	REPS_DISAGREE	0.0002	SCER	NA	0.0002	SPAR	NA	0.000334064	NA	0.000243994	0.000633882
Scer_12.550	Spar_12.509	YLR372W	S000004364	SUR4	653	653	119390	109826	132090	119551	-0.145839	-0.122407	58069	83260	92031.3	121723	-0.664348	-0.547906	68961	43090	77699.6	50858.5	-0.172124	-0.23913	75428	55821	58948	74738.6	0.355652	-0.421038	1	1	1	0.0006	SPAR	NA	0.7378	SPAR	NA	0.0002	SPAR	NA	0.0002	SCER	NA	0.000945863	0.805957	0.000243994	0.000633882
Scer_12.551	Spar_12.510	YLR373C	S000004365	VID22	2103	2103	21136	24641	28666.7	41153.5	-0.439654	-0.739931	11865	15715	17764.8	17614.8	-0.582271	-0.164637	7696	7267	9972.01	6212.16	-0.373733	0.226231	9938	8271	8288.53	9620.69	0.261811	-0.218055	1	1	1	0.0002	SPAR	NA	0.25	SCER	NA	NA	NA	REPS_DISAGREE	0.7458	SCER	NA	0.000334064	0.340975	NA	0.881608
Scer_12.553	Spar_12.512	YLR375W	S000004367	STP3	547	547	12586	13178	15987.2	17459.8	-0.345074	-0.405883	10204	18907	10066	13745.7	0.0196488	0.459908	3155	2288	4740.94	4128.67	-0.58738	-0.85131	4058	5145	5793.86	3765.04	-0.51365	0.450405	1	1	1	0.0002	SPAR	NA	0.0182	SPAR	NA	0.0002	SCER	NA	NA	NA	REPS_DISAGREE	0.000334064	0.0353681	0.000243994	NA
Scer_12.554	Spar_12.513	YLR376C	S000004368	PSY3	670	670	5348	3988	6520.25	8384.54	-0.285879	-1.07188	4505	5562	5794.29	9065.92	-0.363034	-0.704749	507	57	367.093	415.287	0.46476	-2.84345	958	864	746.907	907.896	0.358673	-0.071415	1	0	0	0.0002	SPAR	NA	NA	NA	LOW_COV	NA	NA	REPS_DISAGREE	NA	NA	LOW_COV	0.000334064	NA	NA	NA
Scer_12.555	Spar_12.514	YLR377C	S000004369	FBP1	790	790	62	105	783.541	631.222	-3.63842	-2.57637	277	171	526.596	557.387	-0.924349	-1.69886	128	0	193.631	30.2393	-0.593372	-4.96529	19	29	243.278	227.704	-3.61045	-2.93045	0	0	0	NA	NA	NA	NA	NA	NA	NA	NA	NA	NA	NA	NA	NA	NA	NA	NA
Scer_12.557	Spar_12.516	YLR378C	S000004370	SEC61	1115	1115	126488	101762	110181	87999.9	0.199127	0.209622	52491	81579	33153	34914.4	0.662913	1.22435	77614	55266	93719.5	70164.3	-0.27203	-0.344339	118068	80989	83589.5	105311	0.498219	-0.378853	1	1	1	0.0002	SCER	NA	0.0002	SPAR	NA	0.0002	SCER	NA	0.0134	SPAR	NA	0.000334064	0.000685507	0.000243994	0.0298344
Scer_12.558	Spar_12.517	YLR380W	S000004372	CSR1	866	866	26842	26840	14463.8	16217.3	0.892003	0.72682	15878	24368	10714.7	15236.7	0.567398	0.677403	16923	13204	11610.8	11325.6	0.543477	0.221366	36327	36182	22356	17894.8	0.700357	1.01569	1	1	1	0.0002	SCER	NA	0.0002	SPAR	NA	0.0544	SPAR	NA	NA	NA	REPS_DISAGREE	0.000334064	0.000685507	0.0577118	NA
Scer_12.559	Spar_12.518	YLR381W	S000004373	CTF3	1992	1992	11199	11962	11327.6	11817.6	-0.0164731	0.0175257	10114	14116	8790.17	10118	0.202369	0.480367	1512	1192	1596.45	1914.15	-0.0783582	-0.682862	2020	1520	2315.41	2694.08	-0.196822	-0.825307	1	1	1	NA	NA	REPS_DISAGREE	0.5796	SPAR	NA	0.0002	SCER	NA	0.1438	SPAR	NA	NA	0.667358	0.000243994	0.243799
Scer_12.56	Spar_12.39	YLL029W	S000003952	FRA1	1697	1697	60895	62237	57234.2	66746.8	0.0894454	-0.100925	44414	57639	44186.4	55025.9	0.0074106	0.0669335	20460	12670	13377.7	11657.3	0.612939	0.120179	21465	22912	21831	20580.1	-0.0243917	0.154847	1	1	1	NA	NA	REPS_DISAGREE	0.0054	SCER	NA	NA	NA	REPS_DISAGREE	0.0692	SPAR	NA	NA	0.0122798	NA	0.129103
Scer_12.560	Spar_12.519	YLR382C	S000004374	NAM2	2014	2014	24300	33258	30769.3	29137.5	-0.340525	0.19082	7382	11607	15995.4	19939.7	-1.11546	-0.780596	6499	3076	4889.19	6350.26	0.410549	-1.04552	3839	4286	5618.87	5411.93	-0.549431	-0.336441	1	1	1	NA	NA	REPS_DISAGREE	NA	NA	REPS_DISAGREE	0.0002	SPAR	NA	0.0002	SCER	NA	NA	NA	0.000243994	0.000633882
Scer_12.561	Spar_12.520	YLR383W	S000004375	SMC6	2345	2345	18458	21838	17613.8	21370.3	0.0675366	0.0312354	9935	10756	11806	15589.7	-0.248902	-0.535407	2307	2869	2113.81	2775.97	0.126117	0.0475398	3314	2328	5294.5	5903.62	-0.675758	-1.34213	1	1	1	0.5398	SCER	NA	0.9052	SCER	NA	0.0002	SPAR	NA	0.1086	SPAR	NA	0.581247	0.935255	0.000243994	0.191221
Scer_12.562	Spar_12.521	YLR384C	S000004376	IKI3	3111	3060	108625	102627	95209.1	92631.9	0.166336	0.123981	38376	45402	43491.8	64801.2	-0.204382	-0.537102	56613	36480	37295.2	26423.1	0.578284	0.441444	49276	46829	47236.5	58680.4	0.0371349	-0.349318	1	1	1	0.0002	SCER	NA	0.0002	SCER	NA	0.0002	SPAR	NA	0.9746	SPAR	NA	0.000334064	0.000685507	0.000243994	1
Scer_12.563	Spar_12.522	YLR385C	S000004377	SWC7	371	371	1489	1449	1316.15	725.509	0.177893	0.997001	514	579	1119.02	906.076	-1.12088	-0.645171	920	1169	417.517	1103.73	1.13791	0.0828084	1084	1900	717.03	933.335	0.595578	1.02475	0	0	0	NA	NA	NA	NA	NA	NA	NA	NA	NA	NA	NA	NA	NA	NA	NA	NA
Scer_12.564	Spar_12.523	YLR386W	S000004378	VAC14	2107	2107	27662	21494	25600	25279.7	0.11176	-0.234033	15870	20265	16525.4	20388	-0.0583811	-0.00873014	8076	5336	6927.36	3190.25	0.221306	0.741909	10360	8194	7475.47	8759.51	0.470735	-0.0962703	1	1	1	NA	NA	REPS_DISAGREE	0.051	SCER	NA	NA	NA	REPS_DISAGREE	NA	NA	REPS_DISAGREE	NA	0.0879759	NA	NA
Scer_12.565	Spar_12.524	YLR387C	S000004379	REH1	1151	1169	36312	33082	54062.3	56933.1	-0.551777	-0.760815	30673	43020	37983.3	57477.9	-0.286002	-0.395604	18435	11238	27192.1	13527.1	-0.538327	-0.245053	19420	23089	26229.2	29734.1	-0.411226	-0.342512	1	1	1	0.0002	SPAR	NA	0.8084	SCER	NA	0.0002	SCER	NA	0.0002	SCER	NA	0.000334064	0.861201	0.000243994	0.000633882
Scer_12.567	Spar_12.526	YLR389C	S000004381	STE23	2494	2506	37444	40007	58455.1	70266.2	-0.635656	-0.805637	23266	30468	27044.4	29657.5	-0.21017	0.045823	12788	6319	16360.8	12627.9	-0.348506	-0.991812	20964	17153	19611.6	20605.5	0.103125	-0.257631	1	1	1	0.0002	SPAR	NA	NA	NA	REPS_DISAGREE	0.0002	SCER	NA	0.0002	SCER	NA	0.000334064	NA	0.000243994	0.000633882
Scer_12.569	Spar_12.528	YLR390W-A	S000006429	CCW14	400	424	97326	58948	100400	64219.9	0.039198	-0.0395119	32862	77671	64063.7	48941.9	-0.879002	0.75036	164334	107110	183226	111473	-0.0729248	0.0264612	225351	294481	349663	224873	-0.549726	0.473125	1	1	1	NA	NA	REPS_DISAGREE	NA	NA	REPS_DISAGREE	NA	NA	REPS_DISAGREE	NA	NA	REPS_DISAGREE	NA	NA	NA	NA
Scer_12.57	Spar_12.40	YLL028W	S000003951	TPO1	1281	1284	72002	67147	79728.7	77726.7	-0.143686	-0.20771	22438	19956	55714.4	56620.8	-1.30869	-1.50109	15218	12195	14534.4	12024.2	0.069673	0.0237269	26516	21668	37861.8	38570.4	-0.510487	-0.828522	1	1	1	0.0002	SPAR	NA	0.0048	SCER	NA	0.0002	SPAR	NA	0.0002	SCER	NA	0.000334064	0.0110428	0.000243994	0.000633882
Scer_12.570	Spar_12.529	YLR392C	S000004384	ART10	1349	1349	12096	14588	10663.1	13617.9	0.181888	0.0992679	7919	11144	7366.28	10127.4	0.104368	0.137984	1500	1120	1460.3	240.907	0.0386693	2.21226	1949	1645	1534.36	1762.41	0.344898	-0.0994042	1	0	0	0.0746	SCER	NA	NA	NA	LOW_COV	NA	NA	REPS_DISAGREE	NA	NA	LOW_COV	0.0921267	NA	NA	NA
Scer_12.571	Spar_12.530	YLR393W	S000004385	ATP10	693	693	5203	3679	5731.75	7522.07	-0.139606	-1.03162	2802	4368	4376.46	4562.16	-0.643124	-0.0627298	2599	1231	3729.42	2304.24	-0.520826	-0.903912	2934	2393	4421.69	4475.26	-0.591563	-0.902869	1	1	1	0.0052	SPAR	NA	NA	NA	REPS_DISAGREE	NA	NA	REPS_DISAGREE	0.0002	SCER	NA	0.00740504	NA	NA	0.000633882
Scer_12.572	Spar_12.531	YLR394W	S000004386	CST9	1250	1142	11896	15852	11921.7	12260.2	-0.133481	0.24029	7342	9761	7908.47	9552.02	-0.237577	-0.0991456	0	162	58.4928	1004.95	-6.02501	-2.75598	635	91	57.6185	156.39	3.30923	-0.905003	1	0	0	NA	NA	REPS_DISAGREE	NA	NA	LOW_COV	NA	NA	REPS_DISAGREE	NA	NA	LOW_COV	NA	NA	NA	NA
Scer_12.574	Spar_12.533	YLR396C	S000004388	VPS33	1650	1650	22117	20546	30517.4	30694.7	-0.464459	-0.579108	14571	19560	16468.3	23764.1	-0.176576	-0.280865	3845	2012	4408.14	3395.87	-0.197137	-0.754861	4879	4061	5693.56	6178.86	-0.222704	-0.605385	1	1	1	0.0002	SPAR	NA	NA	NA	REPS_DISAGREE	0.0002	SCER	NA	0.0002	SCER	NA	0.000334064	NA	0.000243994	0.000633882
Scer_12.575	Spar_12.534	YLR397C	S000004389	AFG2	1943	1943	46492	39842	40456.5	37555.7	0.200607	0.0852543	15482	19240	29339.5	40849.9	-0.922211	-1.08618	23792	15800	18412.1	13219.6	0.369804	0.257226	17854	18732	33973.6	31429.4	-0.928128	-0.746578	1	1	1	0.013	SCER	NA	0.0062	SCER	NA	0.0002	SPAR	NA	0.624	SPAR	NA	0.0176181	0.013807	0.000243994	0.780797
Scer_12.576	Spar_12.535	YLR398C	S000004390	SKI2	2918	2918	50414	47861	38693	41878	0.381742	0.192653	23115	24518	18891.6	25275.7	0.291068	-0.0439061	20730	14281	16386	10083.8	0.339234	0.502015	25051	24219	18312	20020.4	0.452056	0.274655	1	1	1	0.0002	SCER	NA	NA	NA	REPS_DISAGREE	NA	NA	REPS_DISAGREE	0.0076	SPAR	NA	0.000334064	NA	NA	0.0177575
Scer_12.577	Spar_12.536	YLR399C	S000004391	BDF1	1791	1806	88175	100028	104364	117062	-0.231143	-0.214834	53112	67291	38161.8	52225.2	0.488932	0.377693	29256	23231	37710.7	25794.1	-0.354198	-0.138953	31883	37851	18753.8	15395	0.777609	1.30984	1	1	1	0.0002	SPAR	NA	NA	NA	REPS_DISAGREE	0.0002	SCER	NA	0.3254	SCER	NA	0.000334064	NA	0.000243994	0.475137
Scer_12.579	Spar_12.538	YLR401C	S000004393	DUS3	1678	1684	54482	60439	75628.5	74727.4	-0.467994	-0.301003	22704	26817	45597.3	65848.1	-1.00082	-1.29081	24151	16173	20269.8	19733.2	0.257892	-0.28187	18437	17846	28800.7	29757.5	-0.638323	-0.732469	1	1	1	0.0002	SPAR	NA	0.7676	SCER	NA	0.0002	SPAR	NA	0.0002	SCER	NA	0.000334064	0.831596	0.000243994	0.000633882
Scer_12.58	Spar_12.41	YLL027W	S000003950	ISA1	605	605	18531	22296	14154.3	13641.7	0.388675	0.708715	18942	25688	10277.3	17087.5	0.882065	0.588126	8186	5684	7692.81	4866.51	0.089637	0.223975	12010	12368	12138.3	9403	-0.0153288	0.395383	1	1	1	0.0002	SCER	NA	0.0002	SPAR	NA	NA	NA	REPS_DISAGREE	0.7772	SPAR	NA	0.000334064	0.000685507	NA	0.903269
Scer_12.581	Spar_12.540	YLR403W	S000004395	SFP1	1343	1362	34392	36789	33056.5	37824.7	0.0774052	-0.019786	15357	17657	19594.1	20101.2	-0.331232	-0.166761	12975	8710	13197.2	10864	-0.00422587	-0.298507	9432	9672	23781.5	19163	-1.31384	-0.966095	1	1	1	NA	NA	REPS_DISAGREE	0.2362	SPAR	NA	0.0002	SPAR	NA	0.0124	SPAR	NA	NA	0.325912	0.000243994	0.0277686
Scer_12.584	Spar_12.545	YLR406C	S000004398	RPL31B	256	171	197274	200676	141407	105892	-0.101806	0.340127	111354	165618	65637.4	122964	0.180406	-0.152522	133429	91290	104945	56992	-0.235713	0.0975397	85341	96498	53551.1	57647	0.0901662	0.161096	1	1	1	NA	NA	REPS_DISAGREE	0.283	SPAR	NA	NA	NA	REPS_DISAGREE	0.6234	SCER	NA	NA	0.378561	NA	0.780772
Scer_12.586	Spar_12.546	YLR407W	S000004399	NA	526	526	11952	13506	23446.7	26174.9	-0.972074	-0.954531	9609	12820	16016.1	25687.9	-0.737009	-1.00264	6988	10341	9436.5	9665.49	-0.433318	0.0974509	6491	6985	11009.4	11529.5	-0.762132	-0.722915	1	1	1	0.0002	SPAR	NA	0.0002	SCER	NA	NA	NA	REPS_DISAGREE	0.0024	SCER	NA	0.000334064	0.000685507	NA	0.00616358
Scer_12.587	Spar_12.547	YLR408C	S000004400	BLS1	314	281	2522	4083	3761.99	4078.13	-0.736933	-0.158474	2915	5711	2341.97	3065.2	0.15546	0.737349	1162	2129	1133.55	603.778	-0.124463	1.65618	1277	1525	953.906	1565.98	0.260262	-0.198431	1	0	0	0.2374	SPAR	NA	NA	NA	LOW_COV	0.0002	SCER	NA	NA	NA	LOW_COV	0.273252	NA	0.000243994	NA
Scer_12.588	Spar_12.548	YLR409C	S000004401	UTP21	2176	2176	91423	87286	88811.9	84133.2	0.0418044	0.0530744	41555	46767	51714.7	71050.1	-0.315545	-0.603336	29639	23960	35515.2	25232.7	-0.260932	-0.074663	27251	22558	37652.6	41921.7	-0.466427	-0.894028	1	1	1	0.0822	SCER	NA	0.0082	SPAR	NA	0.0002	SPAR	NA	NA	NA	REPS_DISAGREE	0.100802	0.017614	0.000243994	NA
Scer_12.589	Spar_12.549	YLR410W	S000004402	VIP1	2538	2541	56292	67254	62769.5	70284	-0.155428	-0.0618716	33982	42183	31609.6	36404.5	0.106108	0.214243	35573	27413	34370.6	24430.3	0.0513124	0.167884	54654	65001	36043.6	37466.4	0.602276	0.796551	1	1	1	0.0514	SPAR	NA	0.0002	SCER	NA	0.0002	SCER	NA	0.001	SCER	NA	0.06473	0.000685507	0.000243994	0.00276591
Scer_12.59	Spar_12.42	YLL026W	S000003949	HSP104	1898	1895	126051	150011	75030.5	82299.1	0.746169	0.86383	104905	121739	53714.5	71758.7	0.963404	0.760276	82846	53186	52503.3	38688.2	0.655731	0.456862	133987	166071	78194.7	83538.5	0.77466	0.988996	1	1	1	0.0002	SCER	NA	0.0732	SPAR	NA	NA	NA	REPS_DISAGREE	0.0002	SPAR	NA	0.000334064	0.120137	NA	0.000633882
Scer_12.599	Spar_12.551	YLR412W	S000004404	BER1	650	650	14617	17133	10297.1	10413.2	0.505366	0.718312	11989	18442	8677.58	11872.6	0.466301	0.635315	2776	2181	1899	1979.67	0.547529	0.139665	2307	2166	1506.62	2012.22	0.614373	0.106196	1	1	1	0.0002	SCER	NA	NA	NA	REPS_DISAGREE	NA	NA	REPS_DISAGREE	0.001	SPAR	NA	0.000334064	NA	NA	0.00276591
Scer_12.601	Spar_12.553	YLR413W	S000004405	NA	1630	1627	170586	161473	218302	218662	-0.358484	-0.440065	63826	92575	131400	151098	-1.0444	-0.709445	128140	85162	132517	79844.9	-0.0511182	0.090351	149164	138208	109650	117448	0.44133	0.232154	1	1	1	0.0002	SPAR	NA	0.0002	SCER	NA	0.0002	SPAR	NA	0.0002	SCER	NA	0.000334064	0.000685507	0.000243994	0.000633882
Scer_12.602	Spar_12.554	YLR414C	S000004406	PUN1	605	605	16144	19429	20283.8	20114.8	-0.329311	-0.0500399	20355	34983	50465.8	66897.6	-1.30988	-0.935282	7592	5388	10437.9	4306.08	-0.459233	0.323308	19178	13692	32846.8	34626.8	-0.77627	-1.33849	1	1	1	0.459	SPAR	NA	NA	NA	REPS_DISAGREE	0.0002	SPAR	NA	NA	NA	REPS_DISAGREE	0.503994	NA	0.000243994	NA
Scer_12.605	Spar_12.557	YLR417W	S000004409	VPS36	1293	1305	10051	10075	9959.89	11392.8	0.0264631	-0.163995	9409	14526	9989.74	11840.8	-0.0730689	0.308172	1830	800	1379.62	821.501	0.42064	-0.0248881	3017	2817	3072.99	3223.72	-0.0131907	-0.181174	1	0	0	NA	NA	REPS_DISAGREE	NA	NA	LOW_COV	NA	NA	REPS_DISAGREE	NA	NA	LOW_COV	NA	NA	NA	NA
Scer_12.606	Spar_12.558	YLR418C	S000004410	CDC73	1027	1036	25164	29302	26712.8	32060.3	-0.0735781	-0.117198	20361	29801	21287.3	30959.5	-0.0515939	-0.0424304	13196	13820	16469.7	13650	-0.307108	0.0304406	14480	19678	18476.3	16627.8	-0.339008	0.255561	1	1	1	0.0072	SPAR	NA	NA	NA	REPS_DISAGREE	0.2894	SCER	NA	NA	NA	REPS_DISAGREE	0.0100812	NA	0.295273	NA
Scer_12.607	Spar_12.559	YLR419W	S000004411	NA	3605	3608	35584	44367	37417.5	40233.5	-0.0712839	0.142287	11817	12813	17024.3	21941.6	-0.525494	-0.774817	9856	8423	10389.5	6183.94	-0.0748482	0.446946	11356	9260	13194.6	16179.9	-0.215279	-0.803852	1	1	1	NA	NA	REPS_DISAGREE	NA	NA	REPS_DISAGREE	0.0002	SPAR	NA	NA	NA	REPS_DISAGREE	NA	NA	0.000243994	NA
Scer_12.611	Spar_12.562	YLR420W	S000004412	URA4	804	804	76778	80955	53647.7	57298.3	0.517167	0.49862	26711	39584	10676.6	15982.2	1.32291	1.3084	44490	38633	27911.1	23061.5	0.672621	0.744322	20591	16990	10091.8	11370.2	1.02876	0.579389	1	1	1	0.0002	SCER	NA	0.038	SCER	NA	0.0002	SCER	NA	0.0002	SPAR	NA	0.000334064	0.0678264	0.000243994	0.000633882
Scer_12.612	Spar_12.563	YLR421C	S000004413	RPN13	367	370	39108	38316	38640.5	39175.5	0.0290963	-0.0202581	29791	39015	25652.5	44914.8	0.227514	-0.191411	20637	11929	18431.3	9286.49	0.174814	0.372978	16585	19679	17217.3	19696.4	-0.0422284	0.0104718	1	1	1	NA	NA	REPS_DISAGREE	0.2178	SCER	NA	NA	NA	REPS_DISAGREE	0.551	SPAR	NA	NA	0.304071	NA	0.715371
Scer_12.613	Spar_12.564	YLR422W	S000004414	NA	4638	4638	25815	30632	24216.4	29759.8	0.0922235	0.0416757	10384	11657	10626.3	11779.9	-0.0332779	-0.0151235	4245	3066	2878.25	2747.75	0.560412	0.158055	5560	4053	7558.69	8598.53	-0.442984	-1.08491	1	1	1	0.2622	SCER	NA	0.317	SCER	NA	0.0638	SPAR	NA	0.262	SPAR	NA	0.300416	0.414202	0.0673347	0.400811
Scer_12.614	Spar_12.565	YLR423C	S000004415	ATG17	1079	1079	4648	6228	4526.68	6853.13	0.0381474	-0.137973	6384	7560	3697.43	4948.64	0.787773	0.611254	1258	28	351.965	189.5	1.83468	-2.71566	1539	1189	1310.29	1187.73	0.231946	0.00154087	1	0	0	NA	NA	REPS_DISAGREE	NA	NA	LOW_COV	0.0002	SCER	NA	NA	NA	LOW_COV	NA	NA	0.000243994	NA
Scer_12.615	Spar_12.566	YLR424W	S000004416	SPP382	1898	1898	11881	14582	7428.76	7193.55	0.67739	1.01931	8216	9346	5205.33	7175.61	0.658344	0.381201	3396	1969	1605.53	1197.48	1.08032	0.716994	2740	3242	1564.24	1777.01	0.808322	0.867068	1	1	1	0.0002	SCER	NA	NA	NA	REPS_DISAGREE	0.0002	SPAR	NA	0.0002	SPAR	NA	0.000334064	NA	0.000243994	0.000633882
Scer_12.625	Spar_12.568	YLR425W	S000004417	TUS1	2972	2972	14084	17483	11400	10307	0.304997	0.762273	7212	8753	4991.4	5778.28	0.530865	0.599053	2705	1370	1795.12	1802.26	0.591276	-0.395381	2880	3347	1860.86	2211.15	0.629822	0.597853	1	1	1	0.0002	SCER	NA	NA	NA	REPS_DISAGREE	NA	NA	REPS_DISAGREE	0.3536	SPAR	NA	0.000334064	NA	NA	0.507511
Scer_12.627	Spar_12.570	YLR427W	S000004419	MAG2	1613	1613	23583	24187	24386	25616.1	-0.048302	-0.0828165	18449	23446	15076.4	19121.2	0.291232	0.294154	5166	3462	4967.85	3344.47	0.0564144	0.0498144	9734	7496	8149.82	7730.67	0.256236	-0.0444665	1	1	1	0.0996	SPAR	NA	0.2634	SCER	NA	0.0002	SCER	NA	0.2006	SPAR	NA	0.120788	0.35556	0.000243994	0.321294
Scer_12.628	Spar_12.572	YLR429W	S000004421	CRN1	1627	1645	72180	76037	65028.9	69608.1	0.166389	0.143317	53111	70035	43900.6	58643.3	0.290637	0.271979	53529	32710	37332.5	32542.5	0.53575	0.0232781	56652	64670	52870.3	49660.7	0.11554	0.396859	1	1	1	0.0002	SCER	NA	NA	NA	REPS_DISAGREE	0.0002	SCER	NA	0.014	SPAR	NA	0.000334064	NA	0.000243994	0.031042
Scer_12.629	Spar_12.573	YLR430W	S000004422	SEN1	5209	5215	65330	81289	57215.3	56449.7	0.193002	0.527746	26454	31854	24603.6	30781.7	0.10627	0.0510613	14629	9314	12146.3	6702.04	0.269952	0.476401	17374	12573	20537.8	22088.5	-0.239678	-0.811258	1	1	1	0.0002	SCER	NA	NA	NA	REPS_DISAGREE	0.0002	SPAR	NA	0.0002	SPAR	NA	0.000334064	NA	0.000243994	0.000633882
Scer_12.630	Spar_12.574	YLR431C	S000004423	ATG23	1267	1267	6003	6829	17129.8	23065.4	-1.5126	-1.75584	6119	8994	13462	19788.5	-1.13739	-1.13754	874	485	1745.71	2155.05	-0.997282	-2.14937	1167	1437	4242.43	3971.89	-1.86119	-1.46612	1	0	0	0.0002	SPAR	NA	NA	NA	LOW_COV	0.0002	SCER	NA	NA	NA	LOW_COV	0.000334064	NA	0.000243994	NA
Scer_12.631	Spar_12.575	NA	NA	NA	536	729	46726	45562	56210.6	55036.4	0.177074	0.171135	36694	43045	25054	34394	0.994169	0.767367	38972	31902	45671.8	33058.6	0.214827	0.392308	86624	82578	41109.7	39593.4	1.51895	1.50417	1	1	1	0.0004	SCER	NA	0.7154	SCER	NA	0.0002	SCER	NA	0.1514	SCER	NA	0.000643008	0.785843	0.000243994	0.254601
Scer_12.632	Spar_12.576	NA	NA	NA	1097	1097	18145	21375	12173.6	14304.7	0.575772	0.579399	15774	18529	7004.25	9453.25	1.17113	0.970827	6459	5203	6055.01	4074.24	0.0931664	0.352735	10701	9278	6525.83	7300.28	0.713426	0.345819	1	1	1	0.0002	SCER	NA	0.0542	SPAR	NA	0.0002	SCER	NA	0.0002	SPAR	NA	0.000334064	0.0927518	0.000243994	0.000633882
Scer_12.634	Spar_12.578	YLR435W	S000004427	TSR2	556	553	34489	29706	53654.7	52038.1	-0.645358	-0.816599	18300	20938	29097.9	53388.9	-0.676848	-1.35818	23201	15398	36756.7	22692.6	-0.671601	-0.567253	15030	16373	27533.1	29963.9	-0.881084	-0.879672	1	1	1	0.0002	SPAR	NA	NA	NA	REPS_DISAGREE	NA	NA	REPS_DISAGREE	0.0002	SCER	NA	0.000334064	NA	NA	0.000633882
Scer_12.635	Spar_12.579	YLR436C	S000004428	ECM30	2963	2966	28139	32600	34076.1	45186	-0.27472	-0.469531	17630	20724	16651	17696.4	0.0838784	0.229295	4109	3226	5789.78	8059.78	-0.493158	-1.31927	10090	7885	7970.56	8900.05	0.341595	-0.173222	1	1	1	0.0002	SPAR	NA	0.0002	SPAR	NA	0.0002	SCER	NA	0.0006	SCER	NA	0.000334064	0.000685507	0.000243994	0.00172141
Scer_12.636	Spar_12.580	YLR437C	S000004429	DIF1	201	187	5820	7801	6146.33	6301.31	-0.18285	0.203807	4940	8533	6481.98	9796.79	-0.496012	-0.303391	5840	8082	6750.87	3986.55	-0.31323	0.915231	6065	7986	11246.3	7458.34	-0.994916	-0.00555189	1	1	1	NA	NA	REPS_DISAGREE	NA	NA	REPS_DISAGREE	0.0044	SPAR	NA	0.484	SPAR	NA	NA	NA	0.00499622	0.647576
Scer_12.637	Spar_12.581	YLR438W	S000004430	CAR2	818	818	56682	36844	32697.5	28920.1	0.793694	0.349346	15565	31095	18643.9	21372.2	-0.260385	0.540924	99342	62919	44828.7	29534.7	1.14796	1.09106	115338	121494	74874.2	68970.9	0.623321	0.816816	1	1	1	0.0002	SCER	NA	0.0002	SCER	NA	NA	NA	REPS_DISAGREE	0.0002	SPAR	NA	0.000334064	0.000685507	NA	0.000633882
Scer_12.639	Spar_12.583	YLR439W	S000004431	MRPL4	890	890	35964	36226	36471.3	40216.6	-0.0202091	-0.150762	13323	23008	24175.8	28173.4	-0.859595	-0.292186	18102	9756	29149.6	18038.8	-0.687295	-0.88667	15252	11976	33736.7	27176	-1.14527	-1.18212	1	1	1	0.422	SPAR	NA	0.0002	SPAR	NA	0.0002	SPAR	NA	0.0006	SCER	NA	0.466435	0.000685507	0.000243994	0.00172141
Scer_12.640	Spar_12.584	YLR440C	S000004432	SEC39	2016	2016	38417	43872	35807.8	40041.9	0.101468	0.131786	28842	35649	24160.2	32429.8	0.255529	0.136537	8514	3961	6014.67	3429.14	0.501281	0.207962	11625	9885	10738.4	10819.3	0.114444	-0.130277	1	1	1	0.0014	SCER	NA	0.4034	SCER	NA	0.4312	SCER	NA	0.0004	SPAR	NA	0.00212301	0.503452	0.43589	0.00118809
Scer_12.642	Spar_12.586	YLR442C	S000004434	SIR3	2552	2588	22666	27353	21744.7	28176.7	0.0800698	-0.0225945	12142	13264	18178	21456.4	-0.561936	-0.673642	6098	7566	5258.3	4330.27	0.233912	0.825141	6184	6133	7353.83	8093.49	-0.229709	-0.379903	1	1	1	NA	NA	REPS_DISAGREE	0.0086	SCER	NA	0.0002	SPAR	NA	0.051	SPAR	NA	NA	0.0183565	0.000243994	0.0981386
Scer_12.643	Spar_12.587	YLR443W	S000004435	ECM7	904	904	12404	13549	12079.4	12519.2	0.0382511	0.11403	8119	12014	16421.5	23380.2	-1.01612	-0.960513	1960	3371	1824.37	1029.14	0.103401	1.71076	3687	2123	2737.95	2621.51	0.429218	-0.304166	1	1	1	0.1964	SCER	NA	0.499	SCER	NA	0.0002	SPAR	NA	NA	NA	REPS_DISAGREE	0.229068	0.596267	0.000243994	NA
Scer_12.646	Spar_12.590	YLR446W	S000004438	NA	962	962	2388	3384	2144.32	3563.03	0.155212	-0.0743544	2048	4398	2383.54	3428.49	-0.218791	0.359182	1105	650	526.435	687.44	1.06829	-0.0806741	1315	1118	390.525	872.865	1.74898	0.356728	1	0	0	NA	NA	REPS_DISAGREE	NA	NA	LOW_COV	NA	NA	REPS_DISAGREE	NA	NA	LOW_COV	NA	NA	NA	NA
Scer_12.647	Spar_12.591	YLR447C	S000004439	VMA6	456	456	61322	60229	49737	52705.1	0.30208	0.192513	43814	62158	35830.2	53126.1	0.290209	0.226514	15470	9195	17387.5	9778.39	-0.168565	-0.0887373	34553	22101	23344	27740.2	0.565737	-0.327856	1	1	1	0.0002	SCER	NA	0.0534	SPAR	NA	NA	NA	REPS_DISAGREE	NA	NA	REPS_DISAGREE	0.000334064	0.091648	NA	NA
Scer_12.648	Spar_12.592	YLR448W	S000004440	RPL6B	128	107	155065	127394	131686	100057	-0.022768	0.0899437	77148	102503	67337.6	103825	-0.0623197	-0.277023	157455	159485	139761	95200.4	-0.0865608	0.485842	184179	236769	99133.7	89238.6	0.635121	1.1492	1	1	1	NA	NA	REPS_DISAGREE	NA	NA	REPS_DISAGREE	0.225	SPAR	NA	0.2734	SCER	NA	NA	NA	0.231026	0.416359
Scer_12.649	Spar_12.593	YLR449W	S000004441	FPR4	737	762	113455	123180	129424	119090	-0.141858	0.0968463	59577	64931	74403.4	127132	-0.272481	-0.921205	40850	43518	47592.9	40080.2	-0.17228	0.166846	48899	43894	57362.4	69059.3	-0.18217	-0.605674	1	1	1	NA	NA	REPS_DISAGREE	NA	NA	REPS_DISAGREE	0.0002	SPAR	NA	NA	NA	REPS_DISAGREE	NA	NA	0.000243994	NA
Scer_12.65	Spar_12.48	NA	NA	NA	177	260	277691	251736	380032	346258	0.102123	0.0948271	109861	157420	111251	164211	0.53662	0.49383	463042	313102	545249	338142	0.318989	0.443766	298840	349972	531729	489322	-0.276554	0.0712197	1	1	1	0.14	SCER	NA	0.076	SCER	NA	0.0002	SCER	NA	0.0002	SPAR	NA	0.166386	0.124302	0.000243994	0.000633882
Scer_12.650	Spar_12.594	NA	NA	NA	2433	2231	19681	23040	17132.8	18715.3	0.0749891	0.174859	16402	22207	11236.9	12674.8	0.420536	0.683961	6520	5787	6580.44	4297.01	-0.138355	0.304352	19235	12013	10354.3	12383.6	0.768399	-0.168875	1	1	1	0.0116	SCER	NA	NA	NA	REPS_DISAGREE	0.0002	SCER	NA	NA	NA	REPS_DISAGREE	0.0158186	NA	0.000243994	NA
Scer_12.651	Spar_12.595	YLR451W	S000004443	LEU3	1967	1967	21852	25773	23290	25690.6	-0.0919414	0.00462247	12113	15197	16717.7	21570.6	-0.464787	-0.505254	5457	5838	3523.69	2293.15	0.630878	1.34776	4877	3897	4425.95	5038.26	0.139975	-0.370478	1	1	1	NA	NA	REPS_DISAGREE	0.0002	SCER	NA	0.0002	SPAR	NA	0.0486	SPAR	NA	NA	0.000685507	0.000243994	0.0941931
Scer_12.652	Spar_12.596	YLR452C	S000004444	SST2	1787	1787	7732	8499	8362.07	8685.26	-0.113004	-0.0312727	25176	31841	7837.45	9710.91	1.68347	1.7131	648	198	448.781	520.116	0.528997	-1.38884	22415	17258	595.391	395.771	5.23213	5.4429	1	0	0	0.6486	SPAR	NA	NA	NA	LOW_COV	0.0002	SCER	NA	NA	NA	LOW_COV	0.688671	NA	0.000243994	NA
Scer_12.653	Spar_12.597	YLR453C	S000004445	RIF2	1161	1161	4912	7539	3665.78	5371.34	0.42209	0.489013	1815	3552	3272.17	3127.9	-0.849925	0.183384	961	712	982.275	1169.25	-0.0315584	-0.714847	816	949	1427.66	1138.52	-0.806253	-0.262426	1	0	0	0.0002	SCER	NA	NA	NA	LOW_COV	0.0002	SPAR	NA	NA	NA	LOW_COV	0.000334064	NA	0.000243994	NA
Scer_12.654	Spar_12.598	YLR454W	S000004446	FMP27	6026	6029	28313	39629	36166.8	41843.3	-0.352474	-0.0777198	13576	14559	13552.9	19540.3	0.00317239	-0.4238	4858	2913	4138.87	3396.88	0.231793	-0.220917	9557	4978	4664.96	8140.62	1.03525	-0.708742	1	1	1	0.0304	SPAR	NA	NA	NA	REPS_DISAGREE	NA	NA	REPS_DISAGREE	NA	NA	REPS_DISAGREE	0.039607	NA	NA	NA
Scer_12.658	Spar_12.603	YLR455W	S000004447	NA	836	836	19241	23414	13554.3	15938.4	0.505406	0.554839	13866	19447	7091.73	10300.9	0.967244	0.916707	6748	3712	2911.53	2091.55	1.2124	0.827322	4908	5145	2411.44	3282.94	1.02494	0.648024	1	1	1	0.0002	SCER	NA	0.0106	SCER	NA	0.0002	SCER	NA	0.0024	SPAR	NA	0.000334064	0.0220872	0.000243994	0.00616358
Scer_12.659	Spar_12.604	YLR456W	S000004448	NA	583	583	4028	4589	3859.19	4902.89	0.0617515	-0.0954326	4311	6695	4638.03	7738.15	-0.105466	-0.208876	1004	853	632.327	1066.44	0.666173	-0.321847	1138	523	1143.83	1183.98	-0.00737074	-1.17722	1	0	0	NA	NA	REPS_DISAGREE	NA	NA	LOW_COV	0.4662	SPAR	NA	NA	NA	LOW_COV	NA	NA	0.470495	NA
Scer_12.66	Spar_12.50	YLL023C	S000003946	POM33	553	553	12598	11819	21140.7	20027.4	-0.746784	-0.760818	12944	20478	15196.8	18443.6	-0.231468	0.150947	7514	4968	12855.3	7639.46	-0.77463	-0.620704	14565	11253	10322.2	11639.6	0.496708	-0.0487256	1	1	1	0.0002	SPAR	NA	NA	NA	REPS_DISAGREE	0.0002	SCER	NA	0.002	SCER	NA	0.000334064	NA	0.000243994	0.00523107
Scer_12.660	Spar_12.605	YLR457C	S000004449	NBP1	919	919	7118	8815	6163.19	4293.5	0.207763	1.03763	6595	8031	3978.92	6074.58	0.728852	0.402738	1858	560	2128.94	1038.22	-0.196283	-0.889423	1430	2555	1696.54	1560.15	-0.246426	0.711282	1	0	0	0.0002	SCER	NA	NA	NA	LOW_COV	NA	NA	REPS_DISAGREE	NA	NA	LOW_COV	0.000334064	NA	NA	NA
Scer_12.661	Spar_12.606	YLR459W	S000004451	GAB1	803	747	20255	18146	12454.3	13089.9	0.597294	0.366872	9751	16446	7064.88	8210.51	0.360538	0.897813	6058	5742	2717.9	1916.16	1.05177	1.47854	11065	7503	3728.13	3888.06	1.46493	0.843945	1	1	1	0.0002	SCER	NA	0.0002	SCER	NA	NA	NA	REPS_DISAGREE	0.0002	SPAR	NA	0.000334064	0.000685507	NA	0.000633882
Scer_12.68	Spar_12.52	YLL021W	S000003944	SPA2	3857	3911	45128	54755	53321.4	66633.7	-0.220629	-0.263197	30260	33402	24277.1	31691.2	0.337861	0.0959082	22905	18377	21839	16689.1	0.0888122	0.159048	37543	36835	29532.7	28475.9	0.366279	0.391383	1	1	1	0.0002	SPAR	NA	0.0002	SCER	NA	0.0002	SCER	NA	0.6258	SCER	NA	0.000334064	0.000685507	0.000243994	0.782323
Scer_12.69	Spar_12.53	YLL019C	S000003942	KNS1	1702	1702	17785	14768	21699.1	23556.7	-0.286961	-0.673627	6367	10227	12864.4	12275.4	-1.01458	-0.263364	1560	294	1586.36	1464.59	-0.0241628	-2.3127	3728	5762	1717.89	1259.88	1.11732	2.19239	1	0	0	0.0002	SPAR	NA	NA	NA	LOW_COV	NA	NA	REPS_DISAGREE	NA	NA	LOW_COV	0.000334064	NA	NA	NA
Scer_12.71	Spar_12.55	YLL018C	S000003941	DPS1	924	924	161641	146021	173391	176577	-0.101232	-0.274116	94243	125240	117151	162955	-0.313911	-0.379772	160278	118753	163343	108252	-0.0273288	0.133573	177190	191325	208408	197179	-0.234114	-0.0434832	1	1	1	0.0002	SPAR	NA	0.219	SCER	NA	0.0212	SPAR	NA	0.2272	SCER	NA	0.000334064	0.305386	0.0230487	0.355033
Scer_12.74	Spar_12.57	NA	NA	NA	3917	3923	39901	45166	38687.1	36588.1	0.0467804	0.306065	17942	22200	12923.3	17135.6	0.475548	0.375754	8894	9241	7807.78	7250.38	0.190106	0.352158	15724	9667	7217.25	12049.1	1.12555	-0.31555	1	1	1	0.039	SCER	NA	0.5584	SCER	NA	0.0006	SCER	NA	NA	NA	REPS_DISAGREE	0.0499759	0.649503	0.000712427	NA
Scer_12.75	Spar_12.58	YLL014W	S000003937	EMC6	192	192	15508	13626	12119.1	11057.3	0.355705	0.301337	11284	17688	6604.97	11808.2	0.772564	0.582942	8925	6039	5042.48	3008.81	0.823594	1.00488	9043	10054	2050.79	3330.48	2.14008	1.59368	1	1	1	0.0024	SCER	NA	0.0084	SCER	NA	0.0002	SCER	NA	0.007	SCER	NA	0.00352953	0.0179946	0.000243994	0.0164843
Scer_12.76	Spar_12.59	YLL013C	S000003936	PUF3	2162	2129	23877	25866	26662.2	24302.1	-0.181359	0.0677842	5611	9072	8196.02	7267.51	-0.568775	0.29773	21126	15658	16781.4	11218.8	0.30995	0.458757	22810	23574	37370.9	29810.8	-0.734416	-0.360819	1	1	1	NA	NA	REPS_DISAGREE	0.0002	SCER	NA	NA	NA	REPS_DISAGREE	0.9948	SPAR	NA	NA	0.000685507	NA	1
Scer_12.77	Spar_12.60	YLL012W	S000003935	YEH1	1335	1335	22712	25596	25284.6	23433.6	-0.154795	0.127333	8153	12063	56167.4	71349	-2.78418	-2.56421	7180	7378	5810.95	4375.63	0.305161	0.753605	9194	6990	26335.9	30607	-1.51817	-2.13034	1	1	1	NA	NA	REPS_DISAGREE	0.0002	SCER	NA	0.0002	SPAR	NA	NA	NA	REPS_DISAGREE	NA	0.000685507	0.000243994	NA
Scer_12.78	Spar_12.61	YLL011W	S000003934	SOF1	1014	1014	38343	38180	36352.3	33465.7	0.0769137	0.190129	15678	18641	23282	39709.3	-0.570441	-1.09096	16116	7872	15477.4	7101.2	0.0583278	0.148648	10007	8803	18467.8	20689.8	-0.883936	-1.23276	1	1	1	0.0072	SCER	NA	0.7854	SPAR	NA	0.0002	SPAR	NA	0.6012	SPAR	NA	0.0100812	0.845458	0.000243994	0.762898
Scer_12.79	Spar_12.62	YLL010C	S000003933	PSR1	1053	1014	28891	30203	21687.2	16658.9	0.359311	0.803911	13040	17376	11785.2	14408.8	0.0915096	0.215685	13564	6233	10732.4	7801.74	0.283332	-0.378271	12941	13118	15087.5	11950.7	-0.275838	0.0799946	1	1	1	0.0002	SCER	NA	0.1716	SPAR	NA	0.0002	SPAR	NA	0.0406	SPAR	NA	0.000334064	0.248978	0.000243994	0.080012
Scer_12.81	Spar_12.64	YLL008W	S000003931	DRS1	1597	1576	91127	89861	82726	85267.6	0.120439	0.0565995	35166	38593	38260.5	56403.5	-0.140768	-0.56653	44401	28981	52526.5	41474.2	-0.261545	-0.536189	33806	41477	44810.1	50393	-0.425632	-0.300003	1	1	1	0.104	SCER	NA	0.0002	SPAR	NA	0.0002	SPAR	NA	0.0002	SCER	NA	0.125602	0.000685507	0.000243994	0.000633882
Scer_12.82	Spar_12.65	YLL007C	S000003930	NA	1763	1763	9296	11885	9266.61	10685.1	0.00456817	0.153524	6373	7370	3194.22	3790.06	0.996283	0.959258	4080	1322	4314.35	3095.5	-0.0805536	-1.22682	3669	1935	4075.98	3601.14	-0.151719	-0.895775	1	1	1	0.893	SCER	NA	0.4056	SPAR	NA	0.0002	SCER	NA	0.0924	SPAR	NA	0.907758	0.505664	0.000243994	0.166952
Scer_12.84	Spar_12.66	YLL006W	S000003929	MMM1	947	947	8741	7643	7419.83	7971.66	0.236382	-0.060734	6579	7793	3982.38	4490.88	0.724093	0.795046	2110	1588	1417.95	1862.74	0.573107	-0.230083	5387	3029	1542.9	2079.78	1.80317	0.542195	1	1	1	NA	NA	REPS_DISAGREE	NA	NA	REPS_DISAGREE	0.0002	SCER	NA	NA	NA	REPS_DISAGREE	NA	NA	0.000243994	NA
Scer_12.85	Spar_12.67	YLL005C	S000003928	SPO75	2007	2007	109	541	224.152	1420.25	-1.0334	-1.3908	29	44	313.533	169.192	-3.39018	-1.91916	0	0	0	0	0	0	0	0	128.041	129.282	-7.01169	-7.0255	0	0	0	NA	NA	NA	NA	NA	NA	NA	NA	NA	NA	NA	NA	NA	NA	NA	NA
Scer_12.86	Spar_12.68	YLL004W	S000003927	ORC3	1547	1547	14319	14202	13987.7	16819.7	0.0337707	-0.244041	10511	15370	10747.6	13796.4	-0.0321096	0.155814	3899	2145	4380.91	3979.49	-0.168085	-0.891297	4459	3555	3809.22	5031.59	0.227168	-0.501045	1	1	1	NA	NA	REPS_DISAGREE	0.0254	SPAR	NA	NA	NA	REPS_DISAGREE	NA	NA	REPS_DISAGREE	NA	0.0472256	NA	NA
Scer_12.87	Spar_12.69	YLL003W	S000003926	SFI1	2441	2441	16726	20040	17524.5	20998.1	-0.0672795	-0.0673708	10714	13876	11282.8	17375.2	-0.0746266	-0.324417	1025	847	984.292	2696.34	0.0584072	-1.6694	1797	1430	1348.7	1804.11	0.413754	-0.335067	1	0	0	0.1362	SPAR	NA	NA	NA	LOW_COV	0.7738	SPAR	NA	NA	NA	LOW_COV	0.16209	NA	0.774558	NA
Scer_12.88	Spar_12.70	YLL002W	S000003925	RTT109	1086	1086	11212	9855	11394.1	10011.2	-0.0232375	-0.0226886	9310	13687	7636.51	11682.8	0.285834	0.228402	3209	3078	2673.52	894.076	0.263292	1.78238	3250	2481	1664.53	2867.57	0.964898	-0.208827	1	1	1	0.7714	SPAR	NA	0.001	SCER	NA	0.0002	SCER	NA	0.0002	SPAR	NA	0.801342	0.00279882	0.000243994	0.000633882
Scer_12.89	Spar_12.71	YLL001W	S000003924	DNM1	1491	1491	20271	24878	22312.1	24958.1	-0.1384	-0.00463712	14901	16751	13345.1	18161	0.159093	-0.116592	10996	9016	15343.3	6897.59	-0.480589	0.386347	12838	13241	14709.8	15563.9	-0.196342	-0.233178	1	1	1	0.8824	SPAR	NA	NA	NA	REPS_DISAGREE	NA	NA	REPS_DISAGREE	0.0012	SPAR	NA	0.899795	NA	NA	0.00326876
Scer_12.90	Spar_12.72	YLR001C	S000003991	NA	2053	2053	10744	15169	10745.4	14252.1	-0.000190306	0.0899426	10213	14859	8034.06	8053.34	0.346168	0.883595	2891	2893	2945.82	2424.18	-0.02709	0.25497	7280	4993	3962.87	3685.8	0.877226	0.437827	1	1	1	NA	NA	REPS_DISAGREE	NA	NA	REPS_DISAGREE	0.0002	SCER	NA	NA	NA	REPS_DISAGREE	NA	NA	0.000243994	NA
Scer_12.91	Spar_12.73	YLR002C	S000003992	NOC3	1642	1642	52184	63098	68680.8	62973.4	-0.396293	0.00285256	25235	31352	45066.4	60027.8	-0.836601	-0.937051	29170	18910	24530.7	16606.4	0.24989	0.187398	18940	17648	22311.2	30222.9	-0.236318	-0.776103	1	1	1	NA	NA	REPS_DISAGREE	0.0064	SCER	NA	0.0002	SPAR	NA	NA	NA	REPS_DISAGREE	NA	0.0142122	0.000243994	NA
Scer_12.92	Spar_12.74	YLR003C	S000003993	CMS1	601	601	33655	29768	45476.1	53844.5	-0.434277	-0.855014	16741	23307	32807.5	56828.6	-0.970596	-1.28582	15786	9034	18705.6	8872.21	-0.244809	0.0260679	7031	7518	17513.9	20017.5	-1.31658	-1.41272	1	1	1	0.0002	SPAR	NA	0.0066	SCER	NA	0.0002	SPAR	NA	0.3468	SPAR	NA	0.000334064	0.0145335	0.000243994	0.500149
Scer_12.93	Spar_12.75	YLR004C	S000003994	THI73	904	901	525	139	1354.83	2015.74	-1.37084	-3.85332	406	720	1545.14	1440.27	-1.93037	-1.00407	191	224	286.413	334.648	-0.586814	-0.581821	171	242	239.01	372	-0.485482	-0.623013	0	0	0	NA	NA	NA	NA	NA	NA	NA	NA	NA	NA	NA	NA	NA	NA	NA	NA
Scer_12.94	Spar_12.76	YLR005W	S000003995	SSL1	884	878	15905	12247	14771.2	14934	0.096858	-0.295973	12690	16749	10014	13993.1	0.33182	0.249519	6007	3400	6175.02	4033.92	-0.0496184	-0.256408	5388	5990	3702.52	5231.35	0.531294	0.185513	1	1	1	NA	NA	REPS_DISAGREE	NA	NA	REPS_DISAGREE	0.0002	SCER	NA	0.7294	SCER	NA	NA	NA	0.000243994	0.871581
Scer_12.95	Spar_12.77	YLR006C	S000003996	SSK1	1579	1579	16746	16215	19471.5	23031.7	-0.217534	-0.506264	11145	15011	20465.4	22621	-0.876729	-0.59161	3938	2192	4028.94	3068.28	-0.0329296	-0.484995	5580	6923	10189.9	8387.51	-0.868692	-0.276808	1	1	1	0.0002	SPAR	NA	0.8612	SCER	NA	0.0002	SPAR	NA	0.05	SCER	NA	0.000334064	0.899619	0.000243994	0.0965591
Scer_12.96	Spar_12.78	YLR007W	S000003997	NSE1	819	819	12926	11485	18849.6	14739.4	-0.544224	-0.359903	9142	15743	14266.6	24943.3	-0.642003	-0.663908	1626	1282	3984.57	2149.01	-1.29257	-0.74482	3093	1959	6937.69	6645.95	-1.16519	-1.76184	1	1	1	0.0002	SPAR	NA	0.0022	SPAR	NA	0.0004	SPAR	NA	NA	NA	REPS_DISAGREE	0.000334064	0.00552335	0.000478845	NA
Scer_12.97	Spar_12.79	YLR008C	S000003998	PAM18	336	336	30439	22616	22851.6	19160	0.413609	0.239236	11305	17569	10716.4	17626.8	0.077133	-0.00474116	14215	6848	16296.3	6029.72	-0.197116	0.183563	7135	8550	5921.9	7503.8	0.268811	0.18828	1	1	1	0.0004	SCER	NA	0.6996	SPAR	NA	0.0014	SPAR	NA	0.2822	SCER	NA	0.000643008	0.773156	0.00163324	0.427826
Scer_12.98	Spar_12.80	YLR009W	S000003999	RLP24	346	349	41311	37492	46317.2	56513.3	-0.152562	-0.579539	17727	25600	27900.9	46532.8	-0.64188	-0.849624	16044	14776	21017.1	18032.7	-0.377051	-0.274888	14171	14653	22970.6	28030.5	-0.684352	-0.9233	1	1	1	0.0006	SPAR	NA	NA	NA	REPS_DISAGREE	0.0002	SPAR	NA	0.0002	SCER	NA	0.000945863	NA	0.000243994	0.000633882
Scer_12.99	Spar_12.81	YLR010C	S000004000	TEN1	483	483	3053	3723	2464.68	1705.09	0.308713	1.12616	3537	6273	1966.94	3391.56	0.846247	0.887011	494	261	173.461	58.4627	1.50452	2.13951	724	313	273.154	258.982	1.40299	0.272354	1	0	0	0.0002	SCER	NA	NA	NA	LOW_COV	NA	NA	REPS_DISAGREE	NA	NA	LOW_COV	0.000334064	NA	NA	NA
Scer_13.102	Spar_13.100	YML053C	S000004517	NA	603	588	15137	14308	15155.1	14950.8	-0.0380625	-0.0997419	19284	30997	12940.6	18338	0.539123	0.720922	4544	3320	7104.86	6618.38	-0.68107	-1.03142	8212	8217	11873.7	10423.1	-0.568249	-0.379403	1	1	1	0.3478	SPAR	NA	0.0002	SPAR	NA	0.0002	SCER	NA	0.713	SPAR	NA	0.390079	0.000685507	0.000243994	0.860825
Scer_13.103	Spar_13.101	YML052W	S000004516	SUR7	655	649	56498	50502	61419.7	57514.7	-0.133775	-0.200863	39576	59167	40210.1	48374.2	-0.0362087	0.277274	31371	15233	35708.8	26965.4	-0.20012	-0.837145	48865	42313	30300.9	37786.7	0.676145	0.149941	1	1	1	0.0002	SPAR	NA	0.4992	SPAR	NA	0.0002	SCER	NA	0.7826	SCER	NA	0.000334064	0.596267	0.000243994	0.908761
Scer_13.104	Spar_13.102	YML051W	S000004515	GAL80	980	980	21686	25793	8424.55	10096.6	1.36399	1.35303	12567	18660	5909.48	8760.17	1.08841	1.09083	706	1351	373.144	327.593	0.918118	2.04072	2400	1528	1195.05	1031.34	1.00536	0.566671	1	0	0	0.0002	SCER	NA	NA	NA	LOW_COV	0.0002	SPAR	NA	NA	NA	LOW_COV	0.000334064	NA	0.000243994	NA
Scer_13.105	Spar_13.103	YML050W	S000004514	AIM32	764	723	4461	3918	6121.54	3893.53	-0.536016	-0.0705408	3254	5212	5574.3	7893.6	-0.855968	-0.678329	1701	856	1299.95	1876.85	0.308087	-1.21129	1018	919	1333.76	1859.58	-0.469005	-1.09562	1	0	0	0.5368	SPAR	NA	NA	NA	LOW_COV	0.0002	SPAR	NA	NA	NA	LOW_COV	0.578549	NA	0.000243994	NA
Scer_13.107	Spar_13.106	YML048W	S000004511	GSF2	897	903	67109	61804	62602.9	60569.6	0.109893	0.0387249	45552	58754	39741.6	51962.4	0.206479	0.186834	31920	22546	27776	17601.3	0.210233	0.36679	46400	39601	36385	37702.5	0.36039	0.0804931	1	1	1	0.3696	SCER	NA	0.1442	SCER	NA	0.0038	SCER	NA	0.0506	SPAR	NA	0.412287	0.214217	0.00433579	0.0975082
Scer_13.108	Spar_13.107	YML047C	S000004510	PRM6	868	868	42	81	28.7629	0	0.530822	6.35755	320	464	0	111.649	8.32643	2.04539	0	0	0	0	0	0	0	56	0	0	0	5.83289	0	0	0	NA	NA	NA	NA	NA	NA	NA	NA	NA	NA	NA	NA	NA	NA	NA	NA
Scer_13.109	Spar_13.108	YML046W	S000004509	PRP39	1411	1411	19063	20927	19266.2	21381.2	-0.0152942	-0.0309737	13357	17522	10357	17281.6	0.366963	0.019931	4006	2919	6740.79	2841.49	-0.750609	0.0388145	5640	3474	5157.92	5616.28	0.128881	-0.692858	1	1	1	0.5836	SPAR	NA	NA	NA	REPS_DISAGREE	0.141	SCER	NA	NA	NA	REPS_DISAGREE	0.624764	NA	0.146245	NA
Scer_13.120	Spar_13.111	YML043C	S000004507	RRN11	1384	1402	19681	21815	14494.5	15259.5	0.459913	0.534227	9401	10568	14549.8	24245.1	-0.611418	-1.17927	1974	864	2117.84	1443.42	-0.0827808	-0.721079	2081	1285	2106.28	3037.3	0.00123285	-1.22173	1	0	0	0.0002	SCER	NA	NA	NA	LOW_COV	0.0002	SPAR	NA	NA	NA	LOW_COV	0.000334064	NA	0.000243994	NA
Scer_13.121	Spar_13.112	YML042W	S000004506	CAT2	1569	1569	1742	2505	3420.8	4434.44	-0.973183	-0.82369	2651	3819	3587.44	4413.58	-0.436275	-0.208703	30	9	449.789	0	-3.86211	3.32193	470	202	582.587	467.919	-0.309221	-1.20786	1	0	0	0.0002	SPAR	NA	NA	NA	LOW_COV	0.0002	SCER	NA	NA	NA	LOW_COV	0.000334064	NA	0.000243994	NA
Scer_13.122	Spar_13.113	YML041C	S000004505	VPS71	686	686	10725	11371	9852.78	11486.1	0.122364	-0.014524	9266	14590	6820.63	11859.7	0.441985	0.298887	3970	4066	5190.73	3248.71	-0.386713	0.323654	3271	4050	4825.02	4491.94	-0.56066	-0.149381	1	1	1	NA	NA	REPS_DISAGREE	NA	NA	REPS_DISAGREE	0.0002	SCER	NA	0.9016	SPAR	NA	NA	NA	0.000243994	0.97625
Scer_13.131	Spar_13.115	YML038C	S000004502	YMD8	909	909	24389	23734	20351.2	18371	0.261103	0.369511	14175	21377	16869.3	22446.6	-0.251032	-0.0704373	1687	1424	2077.5	3048.12	-0.300229	-1.09743	5816	3310	2859.59	3835.1	1.02397	-0.212373	1	1	1	0.0002	SCER	NA	0.0002	SPAR	NA	0.0002	SPAR	NA	0.0002	SCER	NA	0.000334064	0.000685507	0.000243994	0.000633882
Scer_13.132	Spar_13.116	YML037C	S000004501	NA	932	932	4589	3334	4700.25	2851.42	-0.034551	0.225501	2077	2468	3459.25	3687	-0.735681	-0.578912	1597	1224	1461.31	963.626	0.128017	0.34474	1811	1385	2428.51	1652.31	-0.423084	-0.254432	1	0	0	NA	NA	REPS_DISAGREE	NA	NA	LOW_COV	0.0002	SPAR	NA	NA	NA	LOW_COV	NA	NA	0.000243994	NA
Scer_13.134	Spar_13.118	YML035C	S000004498	AMD1	1589	1589	43045	44739	32457.4	34163.4	0.407286	0.389071	19140	23658	18135.5	23023.8	0.0777684	0.0392013	23012	17310	16429.4	10815.6	0.486081	0.678443	25376	26352	18412.3	18866.1	0.462772	0.482098	1	1	1	0.0002	SCER	NA	0.1374	SCER	NA	0.0002	SPAR	NA	0.0006	SPAR	NA	0.000334064	0.206712	0.000243994	0.00172141
Scer_13.137	Spar_13.121	YML032C	S000004494	RAD52	1087	1093	26231	29444	21222.1	23132.9	0.313637	0.355955	15496	23087	16948.1	28144.2	-0.121277	-0.277804	6816	4234	6787.18	4361.52	0.0140539	-0.0348572	6039	6143	11310.3	12185.5	-0.897203	-0.980091	1	1	1	0.0002	SCER	NA	0.0006	SPAR	NA	0.0002	SPAR	NA	0.106	SPAR	NA	0.000334064	0.00177375	0.000243994	0.187132
Scer_13.138	Spar_13.122	YML031W	S000004493	NDC1	1536	1536	43022	44501	44008.2	50949.4	-0.0326973	-0.195222	28315	40121	32545.9	43226.3	-0.200902	-0.107549	13475	8333	11098.5	6554.87	0.279898	0.346221	16398	11129	13954.3	16098.6	0.23279	-0.532569	1	1	1	0.1778	SPAR	NA	0.0002	SCER	NA	NA	NA	REPS_DISAGREE	NA	NA	REPS_DISAGREE	0.208903	0.000685507	NA	NA
Scer_13.139	Spar_13.123	YML030W	S000004492	RCF1	313	313	10910	9653	7068.73	7181.64	0.626057	0.426612	6664	9168	4422.37	7758.76	0.591459	0.240752	3910	3373	2654.36	2913.05	0.558629	0.211433	3466	4254	3117.8	2878.41	0.152696	0.563386	1	1	1	0.0002	SCER	NA	0.5096	SPAR	NA	NA	NA	REPS_DISAGREE	0.003	SPAR	NA	0.000334064	0.606239	NA	0.00754622
Scer_13.14	Spar_13.11	YML130C	S000004599	ERO1	1145	1145	44722	48422	48811.6	56028.9	-0.126237	-0.210505	24471	29209	34686.9	53027.4	-0.503301	-0.860302	16859	13620	16715.8	11979.8	0.0123039	0.185108	20490	19554	25061.9	36989.4	-0.290564	-0.919612	1	1	1	0.0002	SPAR	NA	0.016	SCER	NA	0.0002	SPAR	NA	NA	NA	REPS_DISAGREE	0.000334064	0.0315596	0.000243994	NA
Scer_13.140	Spar_13.124	YML029W	S000004491	USA1	1791	1791	18032	19930	17211.1	21085.4	0.067215	-0.0812992	13002	16339	12179.3	14996.2	0.0942986	0.123714	5742	3717	6448.32	4307.09	-0.167343	-0.21252	9886	8725	8348.28	8351.22	0.243881	0.06316	1	1	1	NA	NA	REPS_DISAGREE	0.1914	SPAR	NA	0.1116	SCER	NA	0.3816	SCER	NA	NA	0.273346	0.116381	0.5405
Scer_13.141	Spar_13.125	YML028W	S000004490	TSA1	255	255	281832	257349	360074	297491	-0.353455	-0.209121	218291	367678	202035	301775	0.111644	0.284969	286387	216030	428036	282797	-0.579764	-0.388534	513309	454757	584742	474816	-0.187973	-0.062272	1	1	1	0.0008	SPAR	NA	0.0732	SPAR	NA	0.0002	SCER	NA	0.3196	SCER	NA	0.00124769	0.120137	0.000243994	0.469723
Scer_13.142	Spar_13.126	YML027W	S000004489	YOX1	913	910	16079	12301	13007.8	11066.2	0.301035	0.147849	7229	9069	9211.1	10994	-0.354283	-0.282423	10724	8871	9982.09	5566.05	0.0986704	0.667598	13900	12839	20138.7	13926.2	-0.539604	-0.12201	1	1	1	0.0084	SCER	NA	NA	NA	REPS_DISAGREE	0.0002	SPAR	NA	0.0026	SPAR	NA	0.0116728	NA	0.000243994	0.00665185
Scer_13.144	Spar_13.128	YML025C	S000004487	YML6	626	626	27765	28868	34734.7	34872.1	-0.323098	-0.272592	13978	21410	23626.7	32011.5	-0.757216	-0.580285	15455	13014	22592.3	18918.7	-0.54773	-0.539715	11902	15251	26035	18434.8	-1.12918	-0.273514	1	1	1	0.0002	SPAR	NA	0.0052	SPAR	NA	0.0002	SPAR	NA	0.2442	SCER	NA	0.000334064	0.0118821	0.000243994	0.378742
Scer_13.146	Spar_13.130	YML023C	S000004485	NSE5	1408	1408	23333	23991	32053.8	36175.2	-0.458105	-0.592487	12694	17385	20986.8	32269.2	-0.725288	-0.892277	2175	1252	1349.37	1196.47	0.688326	0.0653984	1734	1620	1581.31	1828.72	0.132905	-0.174739	1	0	0	0.0002	SPAR	NA	NA	NA	LOW_COV	0.0002	SPAR	NA	NA	NA	LOW_COV	0.000334064	NA	0.000243994	NA
Scer_13.147	Spar_13.131	YML022W	S000004484	APT1	353	353	66513	43764	89293.9	76699.5	-0.424919	-0.809458	27784	44233	43396.5	69953.4	-0.643307	-0.661259	48272	23990	52070.7	27600.4	-0.109282	-0.20225	30175	28968	32114.8	39112.5	-0.0898838	-0.433157	1	1	1	0.0002	SPAR	NA	0.0002	SCER	NA	NA	NA	REPS_DISAGREE	0.0002	SCER	NA	0.000334064	0.000685507	NA	0.000633882
Scer_13.148	Spar_13.132	YML021C	S000004483	UNG1	918	939	14386	14291	17820.1	16413.8	-0.276189	-0.167155	12755	16083	11309.7	18261.5	0.20612	-0.150628	6417	5309	7016.11	3436.19	-0.0961216	0.660112	10796	12077	7144.69	8271.99	0.628115	0.578532	1	1	1	0.001	SPAR	NA	0.0112	SCER	NA	0.0102	SCER	NA	0.9218	SCER	NA	0.00154654	0.0231741	0.01131	0.984917
Scer_13.149	Spar_13.133	YML020W	S000004482	NA	1545	1542	11859	16202	9702.02	12422	0.286794	0.380446	10943	13236	7335.97	9372.52	0.57408	0.495109	2827	2391	1814.28	1818.39	0.636782	0.391958	3255	3342	3519	2681.98	-0.115278	0.314501	1	1	1	0.0002	SCER	NA	0.9332	SCER	NA	0.0038	SCER	NA	0.0002	SPAR	NA	0.000334064	0.954593	0.00433579	0.000633882
Scer_13.150	Spar_13.134	YML019W	S000004481	OST6	752	752	21548	23251	22418.2	27786.7	-0.0571132	-0.257091	17401	23859	15278.2	19419.2	0.187682	0.297033	6167	4460	7666.59	4705.24	-0.31397	-0.0772068	8854	7991	8721.73	10169.1	0.0217118	-0.347706	1	1	1	0.1198	SPAR	NA	NA	NA	REPS_DISAGREE	0.0002	SCER	NA	0.7174	SPAR	NA	0.143744	NA	0.000243994	0.862417
Scer_13.151	Spar_13.135	YML018C	S000004480	NA	855	855	40691	33095	32531.8	28219.4	0.322849	0.229918	20070	24904	21302	27686.4	-0.085946	-0.152796	8138	6829	11237.7	6460.12	-0.465548	0.0801002	9351	5909	9048.24	12334	0.0474784	-1.06152	1	1	1	0.0002	SCER	NA	0.0736	SPAR	NA	0.0002	SPAR	NA	NA	NA	REPS_DISAGREE	0.000334064	0.120626	0.000243994	NA
Scer_13.153	Spar_13.137	YML016C	S000004478	PPZ1	1253	1247	23394	21451	14735.5	17056.9	0.659879	0.323747	14950	21160	11768.7	12637.8	0.338236	0.73662	7800	5612	6158.89	5121.53	0.333831	0.12499	7360	6463	12159.6	9041.01	-0.73117	-0.491141	1	1	1	0.0002	SCER	NA	0.0888	SPAR	NA	NA	NA	REPS_DISAGREE	0.0002	SPAR	NA	0.000334064	0.142092	NA	0.000633882
Scer_13.154	Spar_13.138	YML015C	S000004477	TAF11	820	820	11784	12163	16101.3	18254.8	-0.450312	-0.58574	10585	16580	13336.4	18763.1	-0.333319	-0.178443	5587	4586	5645.56	2922.13	-0.0150405	0.650039	4669	5129	7838.25	8802.88	-0.747293	-0.77918	1	1	1	0.0002	SPAR	NA	0.0008	SCER	NA	0.0002	SCER	NA	0.5502	SPAR	NA	0.000334064	0.0023017	0.000243994	0.714676
Scer_13.155	Spar_13.139	YML014W	S000004476	TRM9	608	608	17457	16975	13905.4	10256.4	0.328143	0.726836	13667	17007	10441.8	17197.4	0.388287	-0.0160622	10280	7756	7743.23	6086.17	0.408786	0.349728	11071	14126	9810.08	9496	0.174431	0.572912	1	1	1	0.0002	SCER	NA	NA	NA	REPS_DISAGREE	NA	NA	REPS_DISAGREE	NA	NA	REPS_DISAGREE	0.000334064	NA	NA	NA
Scer_13.156	Spar_13.140	YML013W	S000004475	UBX2	1378	1369	17059	17346	18298.2	17625.6	-0.110613	-0.032521	12659	17994	10289.4	12056.4	0.289523	0.568224	8571	3921	8639.79	7104.22	-0.0209842	-0.866744	12730	13101	11387.1	9813.37	0.151362	0.407367	1	1	1	0.4488	SPAR	NA	NA	NA	REPS_DISAGREE	0.0002	SCER	NA	0.069	SCER	NA	0.494032	NA	0.000243994	0.128908
Scer_13.157	Spar_13.141	YML012W	S000004473	ERV25	264	264	50957	45763	57495	55842.3	-0.174154	-0.287172	37329	50013	32320.7	56668.9	0.207832	-0.180249	22586	13788	18445.4	11786.3	0.292154	0.226288	32701	30208	18011.1	20146.4	0.860411	0.584387	1	1	1	0.0002	SPAR	NA	0.0002	SCER	NA	NA	NA	REPS_DISAGREE	0.3422	SCER	NA	0.000334064	0.000685507	NA	0.494309
Scer_13.158	Spar_13.142	YML011C	S000004472	RAD33	463	463	6106	5820	7203.62	4749.05	-0.238458	0.293323	4920	7745	4625.04	8335.9	0.0891742	-0.10606	2021	1546	2073.47	1486.77	-0.0369584	0.0563255	2123	2254	2857.45	2805.84	-0.42845	-0.315822	1	1	1	NA	NA	REPS_DISAGREE	NA	NA	REPS_DISAGREE	NA	NA	REPS_DISAGREE	0.806	SPAR	NA	NA	NA	NA	0.922023
Scer_13.159	Spar_13.143	YML010W	S000004470	SPT5	2000	2007	86623	90143	79190.2	80270.4	0.134468	0.172385	45616	51962	39124	53805.5	0.226521	-0.0452545	76365	49711	64595.2	47456.6	0.246522	0.0719966	76077	101824	69605.3	65380.6	0.133302	0.644176	1	1	1	0.0002	SCER	NA	NA	NA	REPS_DISAGREE	NA	NA	REPS_DISAGREE	NA	NA	REPS_DISAGREE	0.000334064	NA	NA	NA
Scer_13.16	Spar_13.13	YML128C	S000004597	MSC1	1190	1190	9222	11751	7850.28	12335.6	0.232307	-0.0700424	14892	25230	5725	5950.9	1.37903	2.08377	576	300	810.831	148.173	-0.492608	1.01278	3480	3134	1261.21	1246.95	1.46356	1.32891	1	0	0	NA	NA	REPS_DISAGREE	NA	NA	LOW_COV	0.0002	SCER	NA	NA	NA	LOW_COV	NA	NA	0.000243994	NA
Scer_13.161	Spar_13.145	YML008C	S000004467	ERG6	647	647	157016	160014	139907	120604	0.166446	0.407916	98533	136453	113844	193991	-0.208382	-0.507579	83955	46104	73211.8	49959.4	0.197538	-0.115861	87141	80159	99874.2	120512	-0.196758	-0.58823	1	1	1	0.0002	SCER	NA	NA	NA	REPS_DISAGREE	0.0002	SPAR	NA	NA	NA	REPS_DISAGREE	0.000334064	NA	0.000243994	NA
Scer_13.162	Spar_13.147	YML007W	S000004466	YAP1	1549	1495	53529	70410	58962.9	67290.7	-0.190677	0.0141809	33676	44391	45587.8	61143.4	-0.488108	-0.513113	19400	15473	25629.9	13118.8	-0.452946	0.186906	16258	19710	33922.4	35605.6	-1.11223	-0.904336	1	1	1	NA	NA	REPS_DISAGREE	NA	NA	REPS_DISAGREE	0.0002	SPAR	NA	0.0008	SPAR	NA	NA	NA	0.000243994	0.00225204
Scer_13.163	Spar_13.148	YML006C	S000004465	GIS4	1837	1837	18370	18634	15636.1	17973	0.232457	0.0521062	10862	12517	11470.8	15420.5	-0.0786678	-0.300937	3741	3924	3463.18	3817.21	0.111297	0.0397966	4776	3387	7592.84	6739.37	-0.668724	-0.992393	1	1	1	0.2878	SCER	NA	0.9196	SPAR	NA	0.0002	SPAR	NA	0.6682	SPAR	NA	0.328139	0.946823	0.000243994	0.821978
Scer_13.166	Spar_13.153	YML005W	S000004464	TRM12	1249	1249	12270	15618	17097.1	17858.8	-0.478579	-0.193416	9050	12244	10522.4	16245.8	-0.217451	-0.407965	3753	2948	6660.11	3165.05	-0.827334	-0.102457	3466	3390	4684.17	5796.02	-0.434414	-0.773601	1	1	1	0.0006	SPAR	NA	NA	NA	REPS_DISAGREE	NA	NA	REPS_DISAGREE	NA	NA	REPS_DISAGREE	0.000945863	NA	NA	NA
Scer_13.167	Spar_13.154	YML004C	S000004463	GLO1	768	768	42279	42443	26010.6	25597.3	0.700822	0.729515	40409	61678	26946.5	41364.3	0.584562	0.576358	23598	12757	13974.7	5387.64	0.755802	1.24341	36610	33881	25422.6	27613.5	0.526111	0.295095	1	1	1	0.0002	SCER	NA	0.4362	SCER	NA	0.0016	SPAR	NA	0.0002	SPAR	NA	0.000334064	0.53646	0.00185949	0.000633882
Scer_13.17	Spar_13.14	YML127W	S000004596	RSC9	1202	1202	29179	31078	28761.9	27506.8	0.020771	0.176099	21690	28357	15677.5	22280.9	0.468309	0.347884	11442	10677	13334.3	6550.84	-0.220789	0.704669	17454	16759	11664.5	12374.4	0.581386	0.437546	1	1	1	0.4466	SCER	NA	NA	NA	REPS_DISAGREE	0.0002	SCER	NA	0.7162	SPAR	NA	0.491919	NA	0.000243994	0.862417
Scer_13.170	Spar_13.156	YML001W	S000004460	YPT7	289	289	17404	18451	13167.5	12558	0.402416	0.555061	19394	30767	10218.4	16990.4	0.924376	0.856623	5919	3831	5588.08	2754.8	0.0829872	0.475626	9149	9535	5770.39	5192.15	0.664854	0.876775	1	1	1	0.0002	SCER	NA	0.6192	SPAR	NA	0.0002	SCER	NA	0.0002	SPAR	NA	0.000334064	0.702354	0.000243994	0.000633882
Scer_13.171	Spar_13.157	YMR001C	S000004603	CDC5	1456	1456	42435	44486	35871.3	33977.8	0.242419	0.388748	22043	24371	23353.8	30860.7	-0.083336	-0.340593	10080	5998	6115.52	5314.05	0.720856	0.174637	10912	9725	9438.76	10906	0.209225	-0.165337	1	1	1	0.0002	SCER	NA	NA	NA	REPS_DISAGREE	0.0002	SPAR	NA	0.8672	SPAR	NA	0.000334064	NA	0.000243994	0.962443
Scer_13.173	Spar_13.159	YMR002W	S000004604	MIC17	384	378	76834	54611	99478.9	82503.5	-0.395362	-0.617976	40218	77478	108032	151395	-1.44824	-0.989175	61701	40725	97420.7	53403.6	-0.681646	-0.413735	47197	59618	166906	115048	-1.84497	-0.971124	1	1	1	0.0002	SPAR	NA	NA	NA	REPS_DISAGREE	0.0002	SPAR	NA	NA	NA	REPS_DISAGREE	0.000334064	NA	0.000243994	NA
Scer_13.174	Spar_13.160	YMR003W	S000004605	AIM34	518	515	6528	5443	4565.36	6258.63	0.507436	-0.20979	4700	7536	2234.57	3647.49	1.06395	1.03831	2172	1216	1689.23	1328.51	0.354088	-0.135949	1871	2097	1907.81	1408.34	-0.0364748	0.565611	1	0	0	NA	NA	REPS_DISAGREE	NA	NA	LOW_COV	0.0002	SCER	NA	NA	NA	LOW_COV	NA	NA	0.000243994	NA
Scer_13.175	Spar_13.161	YMR004W	S000004606	MVP1	1002	1002	16456	21365	14061.1	17647.4	0.226891	0.275777	14057	21184	11648.3	17850.1	0.271143	0.247027	4689	6326	7004.01	6441.98	-0.578798	-0.0262068	7975	7619	8928.73	10456.4	-0.162952	-0.456667	1	1	1	0.0002	SCER	NA	0.0066	SPAR	NA	NA	NA	REPS_DISAGREE	0.0356	SPAR	NA	0.000334064	0.0145335	NA	0.0713059
Scer_13.176	Spar_13.162	YMR005W	S000004607	TAF4	790	796	25672	28054	17623.7	18500	0.553568	0.611572	16796	26378	16342.7	24235.6	0.0503874	0.133118	16605	8496	10231.2	6187.97	0.709505	0.46817	10304	11203	12462.7	11509.5	-0.263469	-0.0280168	1	1	1	0.0002	SCER	NA	NA	NA	REPS_DISAGREE	0.0002	SPAR	NA	0.009	SPAR	NA	0.000334064	NA	0.000243994	0.0207054
Scer_13.177	Spar_13.163	NA	NA	NA	1474	1448	48825	47635	53520.8	58008.9	-0.158152	-0.309923	20837	31867	28975.8	33426.1	-0.501355	-0.0945829	36265	27905	34064	26689.2	0.0646537	0.0385895	42534	40873	31811.8	32904.4	0.393367	0.287182	1	1	1	0.0002	SPAR	NA	0.0002	SCER	NA	NA	NA	REPS_DISAGREE	0.2852	SCER	NA	0.000334064	0.000685507	NA	0.430919
Scer_13.179	Spar_13.165	NA	NA	NA	1441	1373	56331	52698	114377	131722	-1.09152	-1.3914	14962	19989	116006	125081	-3.02448	-2.71527	37051	27195	48151.7	31330.9	-0.447803	-0.273979	20865	17794	127595	124023	-2.6821	-2.87081	1	1	1	0.0002	SPAR	NA	0.0002	SCER	NA	0.0002	SPAR	NA	0.0002	SCER	NA	0.000334064	0.000685507	0.000243994	0.000633882
Scer_13.18	Spar_13.15	YML126C	S000004595	ERG13	658	623	122956	122094	105440	108995	0.142865	0.0848731	49023	60589	117533	149290	-1.34038	-1.37983	112483	57630	91863.9	42861.2	0.213279	0.348284	102005	88657	187245	213775	-0.955138	-1.34863	1	1	1	0.0446	SCER	NA	0.283	SCER	NA	0.0002	SPAR	NA	NA	NA	REPS_DISAGREE	0.0566344	0.378561	0.000243994	NA
Scer_13.180	Spar_13.166	YMR009W	S000004611	ADI1	385	385	16577	11997	25595	22112.6	-0.626648	-0.882142	7983	11415	28608.5	43298.4	-1.84131	-1.92329	10791	9332	12319.8	4404.86	-0.191132	1.08292	5175	7157	19963.7	18532.4	-1.94755	-1.3725	1	1	1	0.0002	SPAR	NA	0.0006	SCER	NA	0.0002	SPAR	NA	0.0022	SPAR	NA	0.000334064	0.00177375	0.000243994	0.00570983
Scer_13.181	Spar_13.167	YMR010W	S000004612	NA	840	846	24815	23989	20997.9	19418	0.251225	0.315231	12085	17515	18573.8	20126.1	-0.609739	-0.190195	6084	4940	4315.35	5649.71	0.505712	-0.183361	6638	6844	5682.89	6731.44	0.234355	0.0341891	1	1	1	0.0002	SCER	NA	NA	NA	REPS_DISAGREE	0.0002	SPAR	NA	0.8452	SCER	NA	0.000334064	NA	0.000243994	0.949924
Scer_13.182	Spar_13.168	NA	NA	NA	1006	1050	477543	566956	386716	530003	0.366114	0.158994	204907	316285	492441	492304	-1.20322	-0.576562	123336	78326	69228.2	57559.5	0.894912	0.506189	82212	67665	114249	149044	-0.412996	-1.07749	1	1	1	0.0002	SCER	NA	0.0002	SCER	NA	0.0002	SPAR	NA	0.9944	SPAR	NA	0.000334064	0.000685507	0.000243994	1
Scer_13.184	Spar_13.172	YMR012W	S000004614	CLU1	2992	2992	193773	219246	174656	175443	0.149849	0.321546	79581	93652	74395.6	95613	0.0972061	-0.029896	147510	92400	113212	64733.3	0.381786	0.513378	161496	151973	114179	129716	0.500203	0.228461	1	1	1	0.0002	SCER	NA	0.0002	SCER	NA	0.0002	SPAR	NA	NA	NA	REPS_DISAGREE	0.000334064	0.000685507	0.000243994	NA
Scer_13.185	Spar_13.173	YMR013C	S000004615	SEC59	1335	1335	19695	25277	26151.4	25665.7	-0.409041	-0.0220177	13231	19161	17111.8	22663.9	-0.371043	-0.242214	3294	3651	3901.87	2707.43	-0.244257	0.431232	4359	2582	4863.43	6502.9	-0.157942	-1.33226	1	1	1	0.6366	SPAR	NA	0.043	SCER	NA	NA	NA	REPS_DISAGREE	NA	NA	REPS_DISAGREE	0.676955	0.0756097	NA	NA
Scer_13.187	Spar_13.175	YMR014W	S000004616	BUD22	1229	1229	52277	53793	48456.5	47097.5	0.109483	0.191763	25119	28055	30689	50247.3	-0.28893	-0.840766	19782	10626	11499.9	11011.1	0.782517	-0.0513606	9170	11476	13213.8	15014.3	-0.527008	-0.387685	1	1	1	0.0002	SCER	NA	NA	NA	REPS_DISAGREE	0.0002	SPAR	NA	0.7952	SPAR	NA	0.000334064	NA	0.000243994	0.915499
Scer_13.188	Spar_13.176	YMR015C	S000004617	ERG5	1022	1022	69528	74447	62562.3	64729.1	0.152299	0.201797	27331	36026	75337.9	88596.2	-1.4628	-1.29818	46897	31005	42603.9	25995.7	0.138506	0.254217	39953	33182	72486.2	85737.2	-0.859387	-1.36949	1	1	1	0.0002	SCER	NA	NA	NA	REPS_DISAGREE	0.0002	SPAR	NA	NA	NA	REPS_DISAGREE	0.000334064	NA	0.000243994	NA
Scer_13.189	Spar_13.177	YMR016C	S000004618	SOK2	2093	2051	33518	32625	34858.6	33060.8	-0.0858231	-0.0483865	13671	20276	12530.9	15303.7	0.0963732	0.376627	19557	16785	23425.3	15969.4	-0.289618	0.042615	13509	20555	20059.8	17028.6	-0.599595	0.242272	1	1	1	0.2646	SPAR	NA	NA	NA	REPS_DISAGREE	0.0002	SCER	NA	NA	NA	REPS_DISAGREE	0.302968	NA	0.000243994	NA
Scer_13.19	Spar_13.16	YML125C	S000004594	PGA3	328	328	24085	30598	27039.1	28674	-0.166905	0.0936925	17688	26989	24011.2	39518.7	-0.440917	-0.550146	6392	6062	8360.43	5899.69	-0.387257	0.0391483	11690	9510	15360.7	18435.7	-0.393936	-0.954909	1	1	1	NA	NA	REPS_DISAGREE	0.6468	SPAR	NA	0.0002	SPAR	NA	NA	NA	REPS_DISAGREE	NA	0.72669	0.000243994	NA
Scer_13.190	Spar_13.178	YMR017W	S000004619	SPO20	1099	1087	506	412	1345.9	2225.16	-1.42543	-2.44618	400	1019	786.43	967.054	-0.989389	0.0595702	209	0	195.648	141.117	0.0789326	-7.16677	193	251	172.856	128.865	0.142328	0.940568	0	0	0	NA	NA	NA	NA	NA	NA	NA	NA	NA	NA	NA	NA	NA	NA	NA	NA
Scer_13.191	Spar_13.179	YMR018W	S000004620	NA	1407	1407	977	416	2418.07	1678.3	-1.30654	-2.00974	1125	2120	2486.61	4085.5	-1.14355	-0.946122	0	0	29.2464	0	-4.91869	0	58	0	123.773	83.408	-1.08052	-6.39931	0	0	0	NA	NA	NA	NA	NA	NA	NA	NA	NA	NA	NA	NA	NA	NA	NA	NA
Scer_13.193	Spar_13.181	YMR020W	S000004622	FMS1	1273	1273	9212	8463	9688.13	15906.6	-0.0726966	-0.910305	9538	14019	16011.8	20564.1	-0.747317	-0.55271	902	1502	1335.25	896.092	-0.565391	0.744518	2698	2739	3324.8	4095.75	-0.301277	-0.580304	1	0	0	0.0222	SPAR	NA	NA	NA	LOW_COV	NA	NA	REPS_DISAGREE	NA	NA	LOW_COV	0.0293821	NA	NA	NA
Scer_13.194	Spar_13.182	YMR021C	S000004623	MAC1	967	967	9902	9103	7418.84	7398.01	0.416477	0.299169	7622	10286	6264.59	9093.4	0.282909	0.177772	3420	2204	1865.72	1619.82	0.873914	0.444056	3167	3949	2174.57	2688.24	0.542182	0.554654	1	1	1	0.0004	SCER	NA	0.2784	SCER	NA	0.3526	SPAR	NA	0.0002	SPAR	NA	0.000643008	0.373252	0.358325	0.000633882
Scer_13.195	Spar_13.183	YMR022W	S000004624	UBC7	309	309	15015	14626	12029.8	11445.4	0.319764	0.353744	13760	18425	8500.89	15295.9	0.69473	0.2685	8416	7290	7339.83	5056.01	0.197362	0.527831	13812	13126	15230.5	11453.6	-0.141031	0.196612	1	1	1	0.0002	SCER	NA	NA	NA	REPS_DISAGREE	NA	NA	REPS_DISAGREE	0.0002	SPAR	NA	0.000334064	NA	NA	0.000633882
Scer_13.196	Spar_13.184	YMR023C	S000004625	MSS1	1382	1013	6018	5073	7686.63	6487.89	-0.801139	-0.802972	5085	7054	3314.61	4952.07	0.169133	0.0621989	1207	245	1246.5	786.222	-0.494544	-2.12624	931	665	569.783	702.712	0.259264	-0.527587	1	0	0	0.0002	SPAR	NA	NA	NA	LOW_COV	0.0002	SCER	NA	NA	NA	LOW_COV	0.000334064	NA	0.000243994	NA
Scer_13.198	Spar_13.187	YMR024W	S000004626	MRPL3	915	879	33527	30382	39048.1	33300.9	-0.277831	-0.190251	16161	23532	27684.4	42787.4	-0.834429	-0.920444	16403	10461	16804.6	10611	-0.0928004	-0.078443	10724	9368	26677.4	24650.8	-1.3726	-1.45364	1	1	1	0.0004	SPAR	NA	0.135	SCER	NA	0.0002	SPAR	NA	0.1032	SPAR	NA	0.000643008	0.203661	0.000243994	0.182788
Scer_13.199	Spar_13.188	YMR025W	S000004627	CSI1	859	859	4171	2952	4602.06	4783.79	-0.141855	-0.696275	2928	5403	3586.57	5593.63	-0.292599	-0.050014	1332	1288	985.301	701.552	0.434577	0.875575	1284	883	1395.65	1135.18	-0.1202	-0.362077	1	0	0	0.0008	SPAR	NA	NA	NA	LOW_COV	NA	NA	REPS_DISAGREE	NA	NA	LOW_COV	0.00124769	NA	NA	NA
Scer_13.200	Spar_13.189	YMR026C	S000004628	PEX12	1071	1071	14501	15803	6758.29	7368.23	1.10131	1.1007	10892	15857	6006.49	7644.54	0.858568	1.05252	1889	402	978.241	491.893	0.94865	-0.290494	3172	2314	1363.64	1319.1	1.21733	0.810368	1	0	0	0.0002	SCER	NA	NA	NA	LOW_COV	0.0622	SPAR	NA	NA	NA	LOW_COV	0.000334064	NA	0.0656913	NA
Scer_13.201	Spar_13.190	YMR027W	S000004629	NA	1237	1243	50458	46468	39345.6	34452.2	0.365852	0.43861	45885	63593	27055.6	36746.3	0.769054	0.798232	23438	15002	14255.1	7714.05	0.724313	0.966485	43189	42857	19110.1	22224.1	1.18326	0.954358	1	1	1	0.0002	SCER	NA	0.0002	SCER	NA	0.0002	SCER	NA	0.0002	SPAR	NA	0.000334064	0.000685507	0.000243994	0.000633882
Scer_13.202	Spar_13.191	YMR028W	S000004630	TAP42	806	806	11488	13099	9351.91	10227.6	0.296767	0.35696	9909	12858	6223.02	9577.79	0.671039	0.424864	4495	2363	3353.25	2702.39	0.422652	-0.193538	3988	3694	3583.02	3869.71	0.154449	-0.0670251	1	1	1	0.0002	SCER	NA	NA	NA	REPS_DISAGREE	0.0018	SCER	NA	0.0468	SPAR	NA	0.000334064	NA	0.00208403	0.0911636
Scer_13.203	Spar_13.192	YMR029C	S000004631	FAR8	1300	1300	23027	29447	23078.7	24808.2	-0.00323814	0.247293	18528	27039	16195.4	23445.5	0.194109	0.205724	3726	2979	4725.81	3393.86	-0.342853	-0.188039	5829	3919	8064.46	9089.8	-0.46826	-1.21355	1	1	1	NA	NA	REPS_DISAGREE	0.0022	SPAR	NA	NA	NA	REPS_DISAGREE	0.9326	SPAR	NA	NA	0.00552335	NA	0.989918
Scer_13.204	Spar_13.193	YMR030W	S000004632	RSF1	829	817	5255	5401	2199.86	3160.08	1.23486	0.752039	5201	7703	1931.43	1754.61	1.40761	2.1126	1057	1300	681.743	91.7259	0.610888	3.78947	1587	1194	593.257	450.82	1.39702	1.38215	1	0	0	0.0002	SCER	NA	NA	NA	LOW_COV	0.0002	SCER	NA	NA	NA	LOW_COV	0.000334064	NA	0.000243994	NA
Scer_13.205	Spar_13.194	YMR031C	S000004633	EIS1	2097	2094	38106	56401	37362	54092.6	0.0263804	0.0582235	35578	41439	24802	31413.8	0.518447	0.397514	20485	11893	21340.8	16146.8	-0.061108	-0.443168	23678	24926	27131.9	26518.7	-0.198501	-0.0914225	1	1	1	0.296	SCER	NA	0.0434	SPAR	NA	0.0002	SCER	NA	0.877	SPAR	NA	0.336503	0.0762563	0.000243994	0.966283
Scer_13.207	Spar_13.196	YMR032W	S000004635	HOF1	1641	1641	29050	29851	22378.5	24257.4	0.376409	0.299343	18232	20002	14104.6	21038.1	0.37028	-0.07286	5407	6054	5829.11	5080.2	-0.108427	0.252957	5713	4990	8045.25	8110.18	-0.493816	-0.700582	1	1	1	0.0002	SCER	NA	0.6518	SPAR	NA	NA	NA	REPS_DISAGREE	0.9844	SPAR	NA	0.000334064	0.730572	NA	1
Scer_13.21	Spar_13.18	YML123C	S000004592	PHO84	472	469	73959	76386	95704	92945.5	-0.381049	-0.292272	57262	77338	15913.9	16019.1	1.83802	2.26212	45213	26771	40107.9	25067.4	0.163649	0.0856572	186153	130229	8775.09	10470.6	4.39758	3.62731	1	1	1	0.0002	SPAR	NA	0.0002	SCER	NA	0.0002	SCER	NA	0.0002	SCER	NA	0.000334064	0.000685507	0.000243994	0.000633882
Scer_13.210	Spar_13.199	YMR034C	S000004637	NA	1018	1052	4189	4640	2925.88	3366.52	0.564984	0.510147	2958	4517	1028.08	1551.07	1.57116	1.58889	220	368	416.509	640.065	-0.870363	-0.749454	946	595	185.66	227.287	2.39035	1.43186	1	0	0	0.0006	SCER	NA	NA	NA	LOW_COV	0.0002	SCER	NA	NA	NA	LOW_COV	0.000945863	NA	0.000243994	NA
Scer_13.211	Spar_13.200	YMR035W	S000004638	IMP2	345	345	4213	3456	1379.63	1537.36	1.60987	1.16812	4950	8161	799.421	1427.39	2.62889	2.51453	560	384	263.217	432.422	1.08627	-0.170914	1617	1169	132.309	389.515	3.60136	1.58306	1	0	0	0.0002	SCER	NA	NA	NA	LOW_COV	0.0002	SCER	NA	NA	NA	LOW_COV	0.000334064	NA	0.000243994	NA
Scer_13.212	Spar_13.201	YMR036C	S000004639	MIH1	1421	1415	9874	14540	10761.3	11422.5	-0.130236	0.342012	6925	9517	7181.8	10584.3	-0.0586288	-0.159443	1929	1136	2181.38	1625.87	-0.183404	-0.522969	2697	2250	4285.11	3737.09	-0.673883	-0.737842	1	0	0	NA	NA	REPS_DISAGREE	NA	NA	LOW_COV	NA	NA	REPS_DISAGREE	NA	NA	LOW_COV	NA	NA	NA	NA
Scer_13.213	Spar_13.202	YMR037C	S000004640	MSN2	1711	1714	26529	35617	24364.1	27903.8	0.125333	0.354621	14753	21314	13067	15174.8	0.177591	0.492619	16594	11484	13633.9	8158.57	0.285976	0.495714	13438	15820	16158.8	15894.2	-0.263455	-0.00422535	1	1	1	0.0002	SCER	NA	0.1824	SCER	NA	NA	NA	REPS_DISAGREE	0.0002	SPAR	NA	0.000334064	0.262394	NA	0.000633882
Scer_13.214	Spar_13.203	YMR038C	S000004641	CCS1	683	683	65958	61063	54728.8	46250.9	0.269242	0.400808	57711	75902	36225.1	64723.9	0.67184	0.229836	70337	49986	35773.4	21292.5	0.975378	1.23114	71986	82097	46293.3	39487	0.636903	1.05593	1	1	1	0.0002	SCER	NA	0.0002	SCER	NA	NA	NA	REPS_DISAGREE	0.0002	SPAR	NA	0.000334064	0.000685507	NA	0.000633882
Scer_13.215	Spar_13.204	YMR039C	S000004642	SUB1	623	626	21285	20950	23864.3	21844.7	-0.158077	-0.0533971	20131	23254	16614.6	25621.8	0.28388	-0.132956	13245	8247	9450.62	10395.3	0.493854	-0.327019	12656	13578	13781.5	13928.3	-0.115971	-0.029815	1	1	1	0.41	SPAR	NA	NA	NA	REPS_DISAGREE	NA	NA	REPS_DISAGREE	0.388	SPAR	NA	0.454174	NA	NA	0.548411
Scer_13.216	Spar_13.205	YMR040W	S000004643	YET2	367	367	1846	2680	4223.19	4577.35	-1.19349	-0.772058	1781	3093	2535.98	3668.11	-0.509613	-0.245956	188	221	321.71	458.63	-0.771853	-1.04991	374	352	281.69	515.461	0.407667	-0.548992	1	0	0	0.0002	SPAR	NA	NA	NA	LOW_COV	0.0002	SCER	NA	NA	NA	LOW_COV	0.000334064	NA	0.000243994	NA
Scer_13.217	Spar_13.206	YMR041C	S000004644	ARA2	739	808	4590	4192	6757.29	8129.47	-0.42907	-0.826575	4861	8495	4246.55	7287.26	0.323701	0.34999	1549	1853	2724.96	1840.57	-0.685713	0.138489	2044	1303	2769.96	3365.93	-0.309502	-1.23971	1	1	1	0.0002	SPAR	NA	NA	NA	REPS_DISAGREE	0.0002	SCER	NA	0.026	SPAR	NA	0.000334064	NA	0.000243994	0.0537559
Scer_13.219	Spar_13.208	YMR042W	S000004645	ARG80	495	513	7571	6600	7954.43	7426.79	-0.0197344	-0.118718	5664	8648	5149.9	5784.29	0.188781	0.631675	2957	3106	4388.98	3587.39	-0.51806	-0.156284	4047	5181	5262.49	3344.24	-0.32728	0.682928	1	1	1	0.5932	SPAR	NA	0.7592	SPAR	NA	0.0002	SCER	NA	NA	NA	REPS_DISAGREE	0.63446	0.824763	0.000243994	NA
Scer_13.220	Spar_13.209	YMR043W	S000004646	MCM1	473	526	25662	26584	24746	24233.6	0.205659	0.286768	17965	23930	19066.6	22286.9	0.0673692	0.255842	9274	9060	9410.28	6962.1	0.132179	0.533164	11320	10889	24204	19906.6	-0.943083	-0.71709	1	1	1	0.0002	SCER	NA	NA	NA	REPS_DISAGREE	NA	NA	REPS_DISAGREE	0.0082	SPAR	NA	0.000334064	NA	NA	0.0189947
Scer_13.221	Spar_13.210	YMR044W	S000004647	IOC4	1220	1256	27606	26350	34518.4	33798.2	-0.28042	-0.317175	18479	20851	13947	22122	0.447861	-0.0434063	11615	6783	12615.3	9372.17	-0.0772176	-0.424446	9814	10766	7460.53	8263.23	0.437472	0.42362	1	1	1	0.0002	SPAR	NA	NA	NA	REPS_DISAGREE	0.0002	SCER	NA	0.9502	SCER	NA	0.000334064	NA	0.000243994	0.996822
Scer_13.23	Spar_13.20	YML121W	S000004590	GTR1	651	651	10966	13275	9879.56	11395.7	0.150505	0.220198	12450	17447	7446.83	10832.6	0.741369	0.687555	4308	3170	3647.73	3487.6	0.239959	-0.137711	5922	6441	3299.19	3557.77	0.843778	0.856131	1	1	1	0.0012	SCER	NA	NA	NA	REPS_DISAGREE	0.0002	SCER	NA	0.4322	SCER	NA	0.001834	NA	0.000243994	0.595269
Scer_13.233	Spar_13.215	YMR047C	S000004650	NUP116	2987	2975	66252	78649	47534.1	62935.6	0.473184	0.315739	42618	48665	25599.7	30483.7	0.729507	0.669023	39995	28239	37751	24172.3	0.0774938	0.218518	35426	38736	35085.4	34184.3	0.00812971	0.174527	1	1	1	0.0002	SCER	NA	0.1072	SPAR	NA	0.0002	SCER	NA	0.0002	SPAR	NA	0.000334064	0.167235	0.000243994	0.000633882
Scer_13.234	Spar_13.216	YMR048W	S000004651	CSM3	828	831	8649	7879	13682.2	12029	-0.656417	-0.605146	9610	13374	7656.43	13785.2	0.333044	-0.0384728	1959	2360	3273.58	1855.69	-0.735238	0.351886	4539	4198	3553.14	3686.22	0.358409	0.192732	1	1	1	0.0002	SPAR	NA	NA	NA	REPS_DISAGREE	0.0002	SCER	NA	0.0098	SCER	NA	0.000334064	NA	0.000243994	0.0223929
Scer_13.235	Spar_13.217	YMR049C	S000004652	ERB1	1816	1813	96036	95698	87435.2	80599.9	0.132974	0.245322	31197	38368	48136.8	72133.1	-0.628101	-0.913126	59035	38168	62370.4	41164.8	-0.0816759	-0.111429	34486	38527	67603.6	75895.4	-0.973454	-0.98051	1	1	1	0.0002	SCER	NA	0.0002	SPAR	NA	0.0002	SPAR	NA	0.0078	SPAR	NA	0.000334064	0.000685507	0.000243994	0.0181461
Scer_13.24	Spar_13.21	YML120C	S000004589	NDI1	1191	1191	25214	25269	22029.4	25059.3	0.194787	0.0120203	13699	21061	21285.6	24956.2	-0.635768	-0.244812	12523	8132	8977.63	5072.14	0.480128	0.680909	7255	7730	10990.2	12982.9	-0.599102	-0.747993	1	1	1	0.7292	SCER	NA	0.0004	SCER	NA	0.0002	SPAR	NA	0.9864	SPAR	NA	0.762701	0.00125798	0.000243994	1
Scer_13.248	Spar_13.222	YMR052W	S000004656	FAR3	491	491	3756	3992	2930.84	2378	0.357775	0.747117	3474	4659	2855.57	3495.48	0.282728	0.414427	647	983	1100.27	225.787	-0.765102	2.11732	786	1094	941.102	1041.35	-0.25952	0.0710929	1	0	0	0.0002	SCER	NA	NA	NA	LOW_COV	NA	NA	REPS_DISAGREE	NA	NA	LOW_COV	0.000334064	NA	NA	NA
Scer_13.25	Spar_13.22	YML119W	S000004588	NA	958	958	19198	20484	21553.3	23633.1	-0.166946	-0.206303	15087	21780	20373.6	27986.2	-0.433367	-0.361695	6136	4813	7717.01	5189.07	-0.330696	-0.108517	7077	6750	13984.2	10288.4	-0.98249	-0.607982	1	1	1	0.0008	SPAR	NA	NA	NA	REPS_DISAGREE	0.0002	SPAR	NA	NA	NA	REPS_DISAGREE	0.00124769	NA	0.000243994	NA
Scer_13.250	Spar_13.223	NA	NA	NA	1935	1935	3056	3203	4715.13	3939.18	-0.625487	-0.298389	2254	2341	5831.53	6879.31	-1.371	-1.55473	286	309	56.4758	518.1	2.32002	-0.743745	786	653	936.834	768.188	-0.252969	-0.234045	1	0	0	0.0056	SPAR	NA	NA	NA	LOW_COV	0.0002	SPAR	NA	NA	NA	LOW_COV	0.00795527	NA	0.000243994	NA
Scer_13.251	Spar_13.224	NA	NA	NA	1836	1833	37070	40173	33080.3	38236.6	0.161916	0.0689112	18622	21517	23569.5	27540.4	-0.342257	-0.358419	7285	4310	8652.9	5687.01	-0.250582	-0.40226	13728	9295	11250.5	14511.7	0.284744	-0.644997	1	1	1	0.0784	SCER	NA	0.0002	SPAR	NA	0.0002	SPAR	NA	0.0002	SCER	NA	0.0965135	0.000685507	0.000243994	0.000633882
Scer_13.252	Spar_13.225	YMR055C	S000004659	BUB2	788	788	5362	4152	7961.37	11229	-0.570157	-1.43513	4253	7463	6682.05	9224.8	-0.651688	-0.305725	1642	931	2186.42	1501.89	-0.412897	-0.689334	3308	2400	2603.5	3143.23	0.345387	-0.389071	1	0	0	0.0002	SPAR	NA	NA	NA	LOW_COV	NA	NA	REPS_DISAGREE	NA	NA	LOW_COV	0.000334064	NA	NA	NA
Scer_13.253	Spar_13.226	YMR056C	S000004660	AAC1	818	818	4257	4987	5464.95	5687.95	-0.360296	-0.189701	3770	5533	3680.98	5420.14	0.0344667	0.0297263	203	59	719.058	310.457	-1.81954	-2.376	733	702	629.536	326.125	0.219202	1.10368	1	0	0	0.0336	SPAR	NA	NA	NA	LOW_COV	0.0096	SCER	NA	NA	NA	LOW_COV	0.0435013	NA	0.0106562	NA
Scer_13.255	Spar_13.228	YMR058W	S000004662	FET3	1362	1365	63217	79469	98289.7	124638	-0.633546	-0.646095	67610	84638	68170	85177.2	-0.00872489	-0.00598727	42215	37420	80491.1	55557.7	-0.927883	-0.56699	143189	116371	127736	131949	0.167929	-0.178072	1	1	1	0.0002	SPAR	NA	NA	NA	REPS_DISAGREE	0.0002	SCER	NA	0.0002	SCER	NA	0.000334064	NA	0.000243994	0.000633882
Scer_13.256	Spar_13.229	YMR059W	S000004663	SEN15	267	327	4029	3721	2663.05	3981.86	0.889611	0.194724	3254	5747	2354.96	3212.92	0.758794	1.13118	1424	1090	1637.8	1934.31	0.0907751	-0.534461	2360	1700	1052.07	1357.05	1.45725	0.6173	1	1	1	0.05	SCER	NA	0.0002	SPAR	NA	NA	NA	REPS_DISAGREE	NA	NA	REPS_DISAGREE	0.0630576	0.000685507	NA	NA
Scer_13.257	Spar_13.230	YMR060C	S000004664	SAM37	849	876	15777	14689	18704.8	17320.9	-0.200405	-0.192596	10849	18718	13868.2	22250.8	-0.309022	-0.204254	6010	3632	7173.43	5298.94	-0.210093	-0.499647	6225	5375	7791.3	7701.89	-0.278578	-0.473701	1	1	1	0.0024	SPAR	NA	0.928	SPAR	NA	0.7582	SPAR	NA	0.0002	SCER	NA	0.00352953	0.951123	0.75919	0.000633882
Scer_13.258	Spar_13.231	YMR061W	S000004665	RNA14	1304	1304	30860	32868	32053.8	39739.2	-0.0547537	-0.273872	22295	29962	21211.1	27718.2	0.0718984	0.112296	8483	9288	7146.2	8023.5	0.247366	0.211112	10093	7236	11604.8	11346	-0.201347	-0.648846	1	1	1	0.018	SPAR	NA	0.0026	SCER	NA	0.0002	SCER	NA	0.018	SPAR	NA	0.0240411	0.00639854	0.000243994	0.0389494
Scer_13.259	Spar_13.232	YMR062C	S000004666	ARG7	938	938	16253	17519	7989.14	12042.8	1.0245	0.540706	14125	21410	6885.59	10973.4	1.03649	0.96421	9281	8088	4683.46	4016.79	0.986554	1.00956	11707	13087	5958.18	6767.72	0.974309	0.951289	1	1	1	0.0002	SCER	NA	NA	NA	REPS_DISAGREE	NA	NA	REPS_DISAGREE	0.0002	SPAR	NA	0.000334064	NA	NA	0.000633882
Scer_13.26	Spar_13.23	YML118W	S000004587	NGL3	1351	1336	416	191	4825.22	4248.84	-3.54888	-4.48434	487	600	2718.73	3830.43	-2.49462	-2.68855	29	0	406.424	231.835	-3.7796	-7.87927	215	248	1000.85	619.721	-2.22968	-1.33391	1	0	0	0.0002	SPAR	NA	NA	NA	LOW_COV	0.0002	SCER	NA	NA	NA	LOW_COV	0.000334064	NA	0.000243994	NA
Scer_13.260	Spar_13.233	YMR063W	S000004667	RIM9	627	630	2732	3259	3917.7	3281.17	-0.513005	-0.00288951	2092	2657	1961.74	2393.59	0.0995867	0.15745	800	564	719.058	694.496	0.160576	-0.292905	1477	1101	492.958	455.408	1.58807	1.27862	1	0	0	0.9794	SPAR	NA	NA	NA	LOW_COV	0.2086	SCER	NA	NA	NA	LOW_COV	0.983327	NA	0.21469	NA
Scer_13.261	Spar_13.234	YMR064W	S000004668	AEP1	1474	1420	27037	29891	27533	33640.4	-0.0800727	-0.224323	17404	21277	19536	22741.2	-0.220555	-0.149857	5447	4714	4707.66	5642.66	0.156565	-0.313218	3221	3848	4955.19	5469.48	-0.675121	-0.561029	1	1	1	0.0024	SPAR	NA	NA	NA	REPS_DISAGREE	NA	NA	REPS_DISAGREE	0.762	SPAR	NA	0.00352953	NA	NA	0.890455
Scer_13.262	Spar_13.235	YMR065W	S000004669	KAR5	1278	1371	4376	4441	10818.8	13164.4	-1.20432	-1.46612	6315	9031	6928.9	11444.9	-0.032482	-0.240373	86	48	252.124	108.862	-1.43942	-1.06349	369	113	247.546	200.596	0.675352	-0.721094	1	0	0	0.0002	SPAR	NA	NA	NA	LOW_COV	0.0002	SCER	NA	NA	NA	LOW_COV	0.000334064	NA	0.000243994	NA
Scer_13.263	Spar_13.236	YMR066W	S000004670	SOV1	2386	2386	15298	17258	14183.1	13989.1	0.109165	0.302941	7843	11102	9341.89	11948.2	-0.252279	-0.105963	1638	1107	2796.56	2403.02	-0.771353	-1.11749	1282	1692	3561.68	3975.22	-1.47344	-1.23182	1	1	1	0.0002	SCER	NA	0.0002	SPAR	NA	0.0002	SPAR	NA	0.0002	SPAR	NA	0.000334064	0.000685507	0.000243994	0.000633882
Scer_13.264	Spar_13.237	YMR067C	S000004671	UBX4	1211	1214	24908	30467	28792.6	32640	-0.205514	-0.0958188	20187	30717	28334.9	38666.7	-0.485561	-0.328475	12960	10627	14026.2	10368.1	-0.110477	0.0391557	13516	16310	29293.7	26315.6	-1.11229	-0.68656	1	1	1	0.0268	SPAR	NA	0.138	SCER	NA	0.0002	SPAR	NA	0.0014	SPAR	NA	0.0351781	0.207219	0.000243994	0.00377538
Scer_13.265	Spar_13.238	YMR068W	S000004672	AVO2	1027	1045	5612	5997	6775.15	9363.13	-0.246626	-0.617597	5401	9080	7567.22	11672.5	-0.461394	-0.337247	949	1079	1729.57	1734.73	-0.840182	-0.659443	1437	1310	4500.65	3692.47	-1.62132	-1.46924	1	0	0	0.0002	SPAR	NA	NA	NA	LOW_COV	NA	NA	REPS_DISAGREE	NA	NA	LOW_COV	0.000334064	NA	NA	NA
Scer_13.266	Spar_13.239	YMR069W	S000004673	NAT4	621	612	1482	2231	2240.53	2469.31	-0.617027	-0.167417	776	1134	1554.67	1978.77	-1.02261	-0.823701	1234	476	2119.86	571.523	-0.801199	-0.284406	603	511	1621.85	2177.78	-1.44697	-2.11037	1	0	0	0.161	SPAR	NA	NA	NA	LOW_COV	NA	NA	LOW_COV	NA	NA	LOW_COV	0.190184	NA	NA	NA
Scer_13.268	Spar_13.241	YMR071C	S000004675	TVP18	394	394	17354	15213	18901.2	17578.9	-0.123202	-0.208531	23879	38924	14735.2	23606.1	0.696442	0.721477	6224	3423	6431.18	4402.84	-0.0472339	-0.363081	15949	11019	6536.5	8226.95	1.28675	0.42152	1	1	1	0.0022	SPAR	NA	NA	NA	REPS_DISAGREE	0.0002	SCER	NA	NA	NA	REPS_DISAGREE	0.00326139	NA	0.000243994	NA
Scer_13.269	Spar_13.242	YMR072W	S000004676	ABF2	474	474	37649	37123	30998.5	32138.7	0.280407	0.207994	47379	76781	17716.3	25466.3	1.41912	1.59212	25456	16037	26336.9	18912.7	-0.0490766	-0.237935	51228	53899	28807.1	30647.8	0.830485	0.814452	1	1	1	0.0002	SCER	NA	0.0002	SPAR	NA	0.0002	SCER	NA	0.0002	SPAR	NA	0.000334064	0.000685507	0.000243994	0.000633882
Scer_13.27	Spar_13.24	YML117W	S000004585	NAB6	2700	2703	42731	51275	39762.2	40619.6	0.105485	0.337676	33785	41911	31136.7	36485.2	0.119364	0.201613	9627	7749	9678.54	7182.84	-0.0060998	0.111042	18428	17360	20798.1	19988.7	-0.172944	-0.201806	1	1	1	0.0002	SCER	NA	0.046	SPAR	NA	NA	NA	REPS_DISAGREE	0.0306	SPAR	NA	0.000334064	0.0802878	NA	0.0619823
Scer_13.270	Spar_13.243	YMR073C	S000004677	IRC21	413	413	6487	5379	7465.46	7521.07	-0.20265	-0.483524	5935	11599	7571.55	12672.2	-0.351288	-0.127655	3748	1583	4404.1	5127.58	-0.23267	-1.69499	3890	4458	10200.6	6217.23	-1.39058	-0.479784	1	1	1	0.0002	SPAR	NA	0.799	SPAR	NA	NA	NA	REPS_DISAGREE	NA	NA	REPS_DISAGREE	0.000334064	0.85508	NA	NA
Scer_13.271	Spar_13.244	YMR074C	S000004678	NA	304	304	23546	17176	29205.2	27707.3	-0.310733	-0.689839	19206	31727	20120.7	36557.4	-0.0671164	-0.204446	16962	8313	15247.5	8831.89	0.153729	-0.0873436	14213	19912	13568.1	15168.6	0.0669885	0.39253	1	1	1	0.0002	SPAR	NA	0.0002	SCER	NA	0.0002	SCER	NA	0.894	SCER	NA	0.000334064	0.000685507	0.000243994	0.973323
Scer_13.272	Spar_13.245	YMR075W	S000004680	RCO1	1650	1650	15335	20836	18593.7	27282.5	-0.277971	-0.388881	9887	14161	12384.5	16302.5	-0.324906	-0.203157	5051	2762	5322.84	7433.83	-0.0756132	-1.42806	4384	5202	5426.81	5694.26	-0.307793	-0.130419	1	1	1	0.0002	SPAR	NA	NA	NA	REPS_DISAGREE	NA	NA	REPS_DISAGREE	0.0004	SCER	NA	0.000334064	NA	NA	0.00118809
Scer_13.273	Spar_13.246	YMR076C	S000004681	PDS5	3023	3164	31535	35098	36585.4	46318.4	-0.148539	-0.334419	17867	19030	17667.8	20763.3	0.081941	-0.0599866	11814	6832	13005.6	9762.26	-0.0728518	-0.449075	16134	12057	8595.83	13658.9	0.974086	-0.114187	1	1	1	0.0002	SPAR	NA	NA	NA	REPS_DISAGREE	0.0002	SCER	NA	0.5868	SCER	NA	0.000334064	NA	0.000243994	0.748759
Scer_13.275	Spar_13.250	YMR077C	S000004682	VPS20	567	567	10529	12406	10538.1	10496.6	-0.00124984	0.241101	7010	11007	5776.97	10368.8	0.279058	0.0861675	2857	2223	2735.04	2699.36	0.0629158	-0.279996	2399	1518	1890.74	3079.42	0.34332	-1.02001	1	1	1	NA	NA	REPS_DISAGREE	NA	NA	REPS_DISAGREE	NA	NA	REPS_DISAGREE	NA	NA	REPS_DISAGREE	NA	NA	NA	NA
Scer_13.276	Spar_13.251	YMR078C	S000004683	CTF18	1808	1808	21273	25866	17368.8	18504.9	0.292509	0.483124	15730	19932	14641.6	20762.5	0.103436	-0.0588881	4689	1719	4210.47	1784.12	0.155264	-0.053612	5755	5263	5917.63	6592.57	-0.0401976	-0.3249	1	1	1	0.0002	SCER	NA	0.0574	SPAR	NA	0.0002	SPAR	NA	0.849	SPAR	NA	0.000334064	0.0971732	0.000243994	0.951813
Scer_13.277	Spar_13.252	YMR079W	S000004684	SEC14	479	479	37574	34028	60304.9	59847	-0.682525	-0.814539	16404	19311	33546.3	40544.1	-1.03206	-1.07003	39106	24884	46013.6	39642.7	-0.234666	-0.671816	40828	40223	46579.2	57617.8	-0.190123	-0.518484	1	1	1	0.0002	SPAR	NA	0.1216	SCER	NA	0.0002	SPAR	NA	0.0002	SCER	NA	0.000334064	0.186018	0.000243994	0.000633882
Scer_13.278	Spar_13.253	YMR080C	S000004685	NAM7	1936	1936	63322	70655	60973.4	61005.3	0.0545271	0.211855	25370	29161	35168.5	40560.4	-0.471144	-0.476019	24896	18799	22721.4	16178	0.131856	0.216607	21147	21425	26054.2	27955	-0.301052	-0.383796	1	1	1	0.0098	SCER	NA	0.9282	SCER	NA	0.0002	SPAR	NA	0.9634	SPAR	NA	0.0135058	0.951123	0.000243994	1
Scer_13.279	Spar_13.254	YMR081C	S000004686	ISF1	853	844	5909	14019	12018.9	22067	-1.0395	-0.669771	4201	7063	14219.8	11735.2	-1.77416	-0.74771	356	478	638.378	1220.66	-0.856048	-1.36605	298	373	2759.29	2857.97	-3.2219	-2.94969	1	0	0	0.0002	SPAR	NA	NA	NA	LOW_COV	NA	NA	REPS_DISAGREE	NA	NA	LOW_COV	0.000334064	NA	NA	NA
Scer_13.28	Spar_13.25	YML116W	S000004584	ATR1	1308	1317	27030	21261	16158.8	16873.3	0.752099	0.343343	13069	14522	12967.4	16956.9	0.0211481	-0.213729	7695	3700	2237.85	970.682	1.79124	1.93925	4631	3146	1764.83	2702.42	1.40118	0.229085	1	1	1	0.0002	SCER	NA	0.0002	SCER	NA	0.0002	SPAR	NA	0.0002	SPAR	NA	0.000334064	0.000685507	0.000243994	0.000633882
Scer_13.281	Spar_13.256	YMR083W	S000004688	ADH3	786	756	116209	126245	90999.8	89002.4	0.29664	0.448163	152923	235166	87531.9	136155	0.748775	0.732287	61225	41888	59840.1	46584.7	-0.0231359	-0.209458	118626	139478	89703.5	88454.2	0.347037	0.600887	1	1	1	0.0002	SCER	NA	0.0002	SPAR	NA	0.0002	SCER	NA	0.0002	SPAR	NA	0.000334064	0.000685507	0.000243994	0.000633882
Scer_13.284	Spar_13.258	YMR086W	S000004692	SEG1	2415	2412	30690	43950	24495.1	28877.4	0.323472	0.60411	19063	25253	16208.4	16137.6	0.232225	0.644203	14926	12592	13508.8	6815.94	0.142124	0.883632	15885	20859	11308.2	12017	0.48847	0.793748	1	1	1	0.0002	SCER	NA	NA	NA	REPS_DISAGREE	NA	NA	REPS_DISAGREE	0.3228	SPAR	NA	0.000334064	NA	NA	0.472878
Scer_13.286	Spar_13.260	YMR087W	S000004693	NA	676	676	4704	6106	7292.88	8334.91	-0.632492	-0.448877	5825	9464	3460.12	6211.13	0.751268	0.607514	1503	631	1429.04	1676.27	0.0727501	-1.40811	3035	2841	1077.68	1075.55	1.49291	1.4005	1	0	0	0.0002	SPAR	NA	NA	NA	LOW_COV	0.0002	SCER	NA	NA	NA	LOW_COV	0.000334064	NA	0.000243994	NA
Scer_13.287	Spar_13.261	YMR088C	S000004694	VBA1	1268	1268	23810	27912	34101.9	34852.2	-0.518265	-0.320354	15836	21232	15263.5	18961.5	0.0531193	0.163161	4565	3666	5313.77	2693.31	-0.219075	0.444682	10351	6812	4065.31	5070.79	1.34812	0.425796	1	1	1	0.0002	SPAR	NA	0.0004	SCER	NA	0.0002	SCER	NA	0.265	SCER	NA	0.000334064	0.00125798	0.000243994	0.40494
Scer_13.288	Spar_13.262	NA	NA	NA	1928	1928	55439	68462	52906.8	53114	0.0674455	0.366206	26704	32432	25721.8	36451.8	0.0540623	-0.168565	11622	7946	11657.2	7453.99	-0.00436336	0.0922039	13828	11583	16131	18785.1	-0.222233	-0.697536	1	1	1	0.0062	SCER	NA	0.3288	SPAR	NA	0.0002	SPAR	NA	0.8688	SPAR	NA	0.00875089	0.427025	0.000243994	0.962443
Scer_13.289	Spar_13.263	YMR090W	S000004696	NA	581	581	6300	5702	10918	8550.28	-0.793187	-0.58442	6749	9894	12582	22051.6	-0.898518	-1.15618	522	620	5668.76	1999.83	-3.4384	-1.68793	2748	2600	11011.5	10854.7	-2.00217	-2.06132	1	0	0	0.0002	SPAR	NA	NA	NA	LOW_COV	0.0002	SPAR	NA	NA	NA	LOW_COV	0.000334064	NA	0.000243994	NA
Scer_13.29	Spar_13.26	YML115C	S000004583	VAN1	1130	1130	35171	31452	34851.7	35960.8	0.0131573	-0.193268	26015	34215	16784.4	20511.7	0.632193	0.738155	16909	10980	12306.7	10136.2	0.458318	0.115348	24137	21242	15098.2	17621.6	0.676836	0.26956	1	1	1	NA	NA	REPS_DISAGREE	0.0006	SCER	NA	0.0002	SCER	NA	0.0002	SPAR	NA	NA	0.00177375	0.000243994	0.000633882
Scer_13.290	Spar_13.264	YMR091C	S000004697	NPL6	915	918	36335	43852	39974.5	42975.7	-0.132993	0.0338425	29231	36367	19113.4	29848.1	0.617614	0.289703	19022	13217	17197.9	10781.3	0.150152	0.298558	18983	22814	8909.53	10674.1	1.09592	1.10045	1	1	1	NA	NA	REPS_DISAGREE	0.0008	SCER	NA	0.0002	SCER	NA	0.0002	SCER	NA	NA	0.0023017	0.000243994	0.000633882
Scer_13.291	Spar_13.265	YMR092C	S000004698	AIP1	1415	1415	55465	58902	54060.3	61691.1	0.0370064	-0.0667439	48475	66835	36530.9	53405.3	0.408115	0.323617	24288	19416	30145	17381.6	-0.311661	0.15968	43078	43623	35072.6	40082.5	0.296599	0.122112	1	1	1	NA	NA	REPS_DISAGREE	NA	NA	REPS_DISAGREE	0.0002	SCER	NA	0.7926	SPAR	NA	NA	NA	0.000243994	0.91453
Scer_13.292	Spar_13.266	YMR093W	S000004699	UTP15	1081	1081	49158	49107	49163.7	48639.9	-0.000167468	0.0137896	21101	26203	39612.5	57858.3	-0.908613	-1.14276	25745	21691	20909.1	17766.6	0.300145	0.287914	19321	17558	36169.5	34786.1	-0.904568	-0.986343	1	1	1	NA	NA	REPS_DISAGREE	0.0028	SCER	NA	0.0002	SPAR	NA	0.8698	SPAR	NA	NA	0.00685507	0.000243994	0.962712
Scer_13.293	Spar_13.267	YMR094W	S000004700	CTF13	1133	1136	4896	4622	5628.6	5981.72	-0.197319	-0.368158	2342	1983	3141.39	3998.76	-0.41969	-1.00769	678	549	622.242	275.178	0.127434	0.99765	713	542	836.535	924.578	-0.226411	-0.765587	1	0	0	0.0006	SPAR	NA	NA	NA	LOW_COV	0.0014	SPAR	NA	NA	NA	LOW_COV	0.000945863	NA	0.00163324	NA
Scer_13.294	Spar_13.268	YMR095C	S000004701	SNO1	585	585	47	0	630.8	256.062	-3.71836	-8.00597	92	327	1133.74	1192.07	-3.60899	-1.86291	0	0	248.09	516.084	-7.96052	-9.01426	0	85	855.742	975.456	-9.74272	-3.50515	0	0	0	NA	NA	NA	NA	NA	NA	NA	NA	NA	NA	NA	NA	NA	NA	NA	NA
Scer_13.295	Spar_13.269	YMR096W	S000004702	SNZ1	655	655	5014	6308	9494.73	9504.06	-0.921029	-0.591285	2372	3391	14065.7	20087.4	-2.5675	-2.56616	84	826	3671.93	1249.89	-5.43333	-0.596997	327	333	16188.7	11871	-5.62523	-5.15158	1	0	0	0.0002	SPAR	NA	NA	NA	LOW_COV	0.0002	SPAR	NA	NA	NA	LOW_COV	0.000334064	NA	0.000243994	NA
Scer_13.296	Spar_13.270	YMR097C	S000004703	MTG1	810	813	10614	10006	11009.2	11509.9	-0.0474084	-0.196656	9357	15835	5530.13	8457.86	0.763961	0.910007	1749	2007	1953.46	1149.09	-0.154079	0.809341	2464	1590	1244.13	1339.12	0.990621	0.25291	1	1	0	0.189	SPAR	NA	NA	NA	REPS_DISAGREE	0.0002	SCER	NA	NA	NA	LOW_COV	0.221321	NA	0.000243994	NA
Scer_13.297	Spar_13.271	YMR098C	S000004704	ATP25	1707	1707	22584	26711	29783.5	32857.3	-0.399195	-0.29877	11512	16871	17758.8	23871.5	-0.625348	-0.500716	4570	4075	5535.64	5232.41	-0.2765	-0.360597	4058	2947	6532.23	6099.63	-0.686672	-1.04922	1	1	1	0.0002	SPAR	NA	NA	NA	REPS_DISAGREE	0.0002	SPAR	NA	NA	NA	REPS_DISAGREE	0.000334064	NA	0.000243994	NA
Scer_13.30	Spar_13.27	YML114C	S000004582	TAF8	1220	1220	24973	28164	18699.8	20562.4	0.417324	0.453827	14852	19573	14259.7	19128.1	0.0587126	0.0331705	4882	4365	5038.45	5037.87	-0.0454975	-0.206788	6317	5869	9684.18	8738.24	-0.61631	-0.574147	1	1	1	0.0002	SCER	NA	0.0002	SPAR	NA	0.0002	SPAR	NA	0.9878	SPAR	NA	0.000334064	0.000685507	0.000243994	1
Scer_13.302	Spar_13.275	YMR099C	S000004705	NA	610	610	40720	39772	48927.7	50596	-0.264907	-0.347264	38684	59466	34225.3	52926	0.17667	0.168085	31497	17619	34355.4	22424.5	-0.12532	-0.347924	41519	43349	31376.5	36762.1	0.404077	0.237775	1	1	1	0.0002	SPAR	NA	NA	NA	REPS_DISAGREE	0.0002	SCER	NA	0.5352	SCER	NA	0.000334064	NA	0.000243994	0.699839
Scer_13.303	Spar_13.276	YMR100W	S000004706	MUB1	1440	1437	15178	14771	12701.3	12966.9	0.253979	0.184917	6384	7741	7032.83	7577.55	-0.142633	0.0277763	4096	3907	4593.7	913.227	-0.168411	2.0928	5098	3915	3030.31	3734.18	0.747266	0.065196	1	1	1	0.0006	SCER	NA	NA	NA	REPS_DISAGREE	0.0002	SPAR	NA	0.0434	SPAR	NA	0.000945863	NA	0.000243994	0.0852184
Scer_13.304	Spar_13.277	YMR101C	S000004707	SRT1	887	890	426	953	325.318	53.5944	0.392828	4.13204	424	966	329.123	365.007	0.369332	1.40652	29	0	29.2464	112.893	-0.00692908	-6.82667	30	0	61.8865	35.0314	-1.01561	-5.16631	0	0	0	NA	NA	NA	NA	NA	NA	NA	NA	NA	NA	NA	NA	NA	NA	NA	NA
Scer_13.305	Spar_13.278	YMR102C	S000004708	NA	2022	2025	103337	116313	86218.2	96661.4	0.263428	0.269137	34221	38231	52363.4	49952.7	-0.611523	-0.383673	9175	7685	9187.4	4003.68	0.000190726	0.942683	7931	8066	10130.2	10559.9	-0.350908	-0.386485	1	1	1	0.0002	SCER	NA	NA	NA	REPS_DISAGREE	0.0002	SPAR	NA	0.0004	SPAR	NA	0.000334064	NA	0.000243994	0.00118809
Scer_13.307	Spar_13.280	NA	NA	NA	1675	1675	16256	22603	6998.31	9289.69	1.21578	1.28272	11578	15645	18848.3	14103.9	-0.703003	0.1496	2800	1372	1645.87	84.6701	0.766219	4.0024	2364	2836	2543.75	1757.82	-0.105684	0.689756	1	0	0	0.0002	SCER	NA	NA	NA	LOW_COV	0.0002	SPAR	NA	NA	NA	LOW_COV	0.000334064	NA	0.000243994	NA
Scer_13.308	Spar_13.281	NA	NA	NA	1378	1378	30234	53418	30406.3	49502.3	-0.00819993	0.109828	49101	82170	19505.7	15789.8	1.33181	2.37955	2524	1067	2042.2	2214.53	0.30545	-1.05274	9788	11279	3839.1	1883.35	1.35002	2.58163	1	1	1	NA	NA	REPS_DISAGREE	NA	NA	REPS_DISAGREE	0.0002	SCER	NA	NA	NA	REPS_DISAGREE	NA	NA	0.000243994	NA
Scer_13.31	Spar_13.28	YML113W	S000004581	DAT1	384	405	12450	13719	15676.8	17082.7	-0.255643	-0.239525	8301	13394	15893.2	20365.7	-0.86015	-0.5277	9313	6861	12507.4	11453.6	-0.348605	-0.662416	6529	6269	18013.3	13047.5	-1.38717	-0.980532	1	1	1	0.0072	SPAR	NA	0.1946	SPAR	NA	0.0002	SPAR	NA	NA	NA	REPS_DISAGREE	0.0100812	0.277079	0.000243994	NA
Scer_13.310	Spar_13.282	YMR106C	S000004712	YKU80	1273	1264	5623	5961	4006.97	4764.93	0.47849	0.312801	3936	6376	2806.2	3101.27	0.477727	1.02932	1169	778	1202.13	1320.45	-0.0505168	-0.772662	2232	1841	1570.64	1421.27	0.496479	0.36284	1	0	0	0.0004	SCER	NA	NA	NA	LOW_COV	NA	NA	REPS_DISAGREE	NA	NA	LOW_COV	0.000643008	NA	NA	NA
Scer_13.314	Spar_13.287	YMR107W	S000004713	SPG4	177	177	30	108	38.6811	0	-0.356185	6.76818	257	453	41.5734	25.7652	2.59935	4.08426	0	0	0	0	0	0	86	28	0	0	6.44294	4.85798	0	0	0	NA	NA	NA	NA	NA	NA	NA	NA	NA	NA	NA	NA	NA	NA	NA	NA
Scer_13.315	Spar_13.288	YMR108W	S000004714	ILV2	1236	1236	130851	136902	130049	132839	0.00887058	0.0434692	63377	72433	74616.4	96351.6	-0.23553	-0.411656	136652	105705	109942	91352	0.313759	0.210534	97660	109651	170815	159202	-0.806592	-0.537936	1	1	1	0.7756	SCER	NA	0.1124	SCER	NA	0.0002	SPAR	NA	0.953	SPAR	NA	0.805228	0.174312	0.000243994	0.998057
[truncated: 3,497 more rows]
[truncated: 36 more columns]
