# Supplementary material for: Evolution at two levels of gene expression in yeast
Source: HighWire-hosted journal article supplement (doi:10.1101/gr.165522.113), 2013-12-06
Supplement: Supplemental_Table_S3.xlsx [file Supplemental_Table_S3.xlsx]

## Sheet: Sheet1
Supplemental Table S3. Detailed results of test for polygenic adaptation.
HEADER LEGEND
CLASS	Functional annotation set
CATEGORY	Functional group within annotation set
OBS_SCER	Observed number of genes with higher expression of the Scer allele
OBS_SPAR	Observed number of genes with higher expression of the Spar allele
EXP_SCER	Expected number of genes with higher expression of the Scer allele based on total number of genes showing significant cis bias
EXP_SPAR	Expected number of genes with higher expression of the Spar allele based on total number of genes showing significant cis bias
SIG_DIR	Parental direction with the most upregulating alleles
CHI_SQUARE	Chi-square value calculated from goodness of fit test
FDR	How often equal or larger chi-square value would be expected by chance in this functional annotation set (10,000 permutations)
SCER_GENES	Significantly biased Scer genes belonging to functional group
SPAR_GENES	Significantly biased Spar genes belonging to functional group
MRNA ABUNDANCE CIS
Top 25% most strongly reinforcing cis-biased genes (based on product of cis-ratios)
CLASS	CATEGORY	OBS_SCER	OBS_SPAR	EXP_SCER	EXP_SPAR	SIG_DIR	CHI_SQUARE	FDR	SCER_GENES	SPAR_GENES
GO COMPONENT	anchored to membrane [GO:0031225]	9	2	5	6	SCER	5.87	0.157	YBR067C|YDR055W|YDR144C|YEL040W|YHR143W|YIL011W|YLR121C|YLR194C|YOR009W|	YKL096W-A|YLR040C|
All significantly cis-biased genes in each species
CLASS	CATEGORY	OBS_SCER	OBS_SPAR	EXP_SCER	EXP_SPAR	SIG_DIR	CHI_SQUARE	FDR	SCER_GENES	SPAR_GENES
GO PROCESSES	chromatin silencing at telomere [GO:0006348]	24	8	15	17	SCER	10.16	0.147	YAR003W|YBL052C|YBR060C|YDL074C|YDL084W|YDR181C|YDR448W|YEL056W|YER088C|YJL115W|YJL127C|YLR015W|YLR052W|YLR223C|YLR288C|YML121W|YMR235C|YNL107W|YNL206C|YNL216W|YNL262W|YOR209C|YOR213C|YPL001W|	YBR088C|YBR175W|YBR278W|YDR191W|YHR119W|YMR127C|YMR179W|YOR025W|
GO FUNCTION	endopeptidase activity [GO:0004175]	10	1	5	6	SCER	9.16667	0.134	YER012W|YGL011C|YGR253C|YHR027C|YIL075C|YML092C|YMR035W|YMR314W|YOL038W|YPR103W|	YDR069C|
MIPS FUNCTIONAL CATEGORIES	mating |fertilization| [41.01.01]	4	22	13	13	SPAR	12.4615	0.039	YBR081C|YDR182W|YDR312W|YER068W|	YAL041W|YBR073W|YBR129C|YCR002C|YDL223C|YDR496C|YFL037W|YGR238C|YHR066W|YHR107C|YHR158C|YIL026C|YJL073W|YJR053W|YML124C|YMR065W|YMR305C|YNL161W|YNL188W|YNL313C|YOR191W|YPR141C|
MIPS COMPLEXES	Complex Number 132 [550.2.132]	17	4	10	11	SCER	9.35455	0.0906	YBL045C|YBR225W|YCR088W|YDL065C|YFR001W|YGL111W|YGR086C|YHR098C|YKL056C|YKL085W|YKL143W|YKR026C|YLL026W|YLR438W|YML091C|YMR307W|YNL118C|	YBL047C|YDR023W|YER006W|YOR232W|
PFAM DOMAINS	SH3_1	11	1	6	6	SCER	8.33333	0.0696	YBL007C|YCR088W|YDL117W|YDR388W|YER118C|YFR024C-A|YGR136W|YHR114W|YJL020C|YLR310C|YMR032W|	YHR016C|
	AAA	14	2	8	8	SCER	9	0.05	YDR375C|YER047C|YGR270W|YKL145W|YKL197C|YLL026W|YLR397C|YML065W|YMR078C|YNL290W|YOR217W|YPL074W|YPR024W|YPR173C|	YDL007W|YDL126C|
TRANSLATIONAL CIS
All significantly cis-biased genes in each species
CLASS	CATEGORY	OBS_SCER	OBS_SPAR	EXP_SCER	EXP_SPAR	SIG_DIR	CHI_SQUARE	FDR	SCER_GENES	SPAR_GENES
GO FUNCTION	transferase activity [GO:0016740]	87	57	70	74	SCER	8.03	0.1321	YBL024W|YBL082C|YBR038W|YBR097W|YBR126C|YBR261C|YBR263W|YCL054W|YDL028C|YDL033C|YDL052C|YDL103C|YDL131W|YDL159W|YDL201W|YDR017C|YDR121W|YDR147W|YDR198C|YDR283C|YDR419W|YDR477W|YER001W|YER052C|YER055C|YFR019W|YGL017W|YGL202W|YGR012W|YGR019W|YGR177C|YGR202C|YGR227W|YGR252W|YHR070W|YHR102W|YHR109W|YHR119W|YHR135C|YHR205W|YIL014W|YIL064W|YIL147C|YIR038C|YJL087C|YJL186W|YJL187C|YJR143C|YKL101W|YKL104C…	YAR019C|YBL009W|YBR199W|YBR236C|YBR248C|YCL004W|YCR034W|YCR036W|YDR127W|YFL036W|YFR018C|YGL142C|YGL211W|YGR007W|YGR010W|YGR194C|YGR262C|YGR286C|YHR025W|YIL035C|YIL085C|YIL107C|YJL060W|YJL095W|YJL100W|YJL128C|YJL196C|YJR013W|YJR057W|YJR059W|YJR073C|YJR075W|YJR122W|YKL139W|YKL165C|YKL168C|YKR056W|YLL031C|YLR248W|YLR305C|YMR139W|YMR291W|YMR307W|YNL029C|YNL071W|YNL151C|YNR030W|YOL124C|YOR002W|YOR067C…
MIPS COMPLEXES	Complex Number 140 probably RNA metabolism [550.1.140]	2	15	8	9	SPAR	8.5	0.093	YGL049C|YHR052W|	YCL059C|YDL051W|YDR060W|YER029C|YJL109C|YLL008W|YLR106C|YLR276C|YLR409C|YMR049C|YNL005C|YNL132W|YOL041C|YOR206W|YPL043W|
REINFORCING DIRECTION OF CIS-BIAS
Top 50% most strongly reinforcing cis-biased genes (based on product of cis-ratios)
CLASS	CATEGORY	OBS_SCER	OBS_SPAR	EXP_SCER	EXP_SPAR	SIG_DIR	CHI_SQUARE	FDR	SCER_GENES	SPAR_GENES
GO FUNCTIONS	kinase activity [GO:0016301]	3	18	10	11	SPAR	9.35455	0.0274	YJR049C|YOL136C|YPR161C|	YDL101C|YDR109C|YDR248C|YDR531W|YEL029C|YER069W|YER123W|YGR194C|YGR262C|YIL035C|YIL095W|YJL100W|YKL048C|YKL139W|YLR305C|YMR139W|YMR291W|YPL031C|
GO PROCESSES	DNA replication [GO:0006260]	1	12	6	7	SPAR	7.7381	0.1219	YOR346W|	YBR088C|YCL016C|YDR489W|YFR027W|YHR031C|YHR191C|YJL072C|YJR006W|YKL112W|YLL004W|YOL146W|YPR175W|
MIPS COMPLEXES	Complex Number 108 probably protein synthesis turnover [550.1.108]	2	10	6	6	SPAR	5.33333	0.0501	YDR116C|YDR164C|	YCR030C|YDR405W|YDR462W|YGR220C|YJL005W|YJL176C|YLR189C|YLR439W|YML025C|YNL185C|
All reinforcing cis-biased genes
CLASS	CATEGORY	OBS_SCER	OBS_SPAR	EXP_SCER	EXP_SPAR	SIG_DIR	CHI_SQUARE	FDR	SCER_GENES	SPAR_GENES
MIPS PHENOTYPES	Divalent cations and heavy metals sensitivity [62.35.02]	17	5	11	11	SCER	6.54545	0.1898	YCR008W|YCR047C|YDL128W|YDR182W|YDR293C|YDR515W|YFR052W|YGL255W|YHR030C|YJR104C|YMR021C|YMR022W|YMR231W|YNR052C|YOR018W|YPL057C|YPL177C|	YDR323C|YJL101C|YLR337C|YMR273C|YNL027W|
