# Supplementary material for: Evolution at two levels of gene expression in yeast
Source: HighWire-hosted journal article supplement (doi:10.1101/gr.165522.113), 2013-12-06
Supplement: Supplemental_Table_S4.xlsx [file Supplemental_Table_S4.xlsx]

## Sheet: Sheet1
Supplementary Table S4. Orthologs showing evidence of C-terminal peptide extensions.
SCER_ORTHO	The S. cerevisiae ortholog
SPAR_ORTHO	The S. paradoxus ortholog
SGD	Saccharomyces Genome Database name
STANDARD_NAME	Standard three-letter gene name
HYB_RIBO_REP1_SCER	Total reads mapping to the potential S. cerevisiae C-terminal peptide extension in the hybrid Ribo fraction replicate 1
HYB_RIBO_REP2_SCER	Total reads mapping to the potential S. cerevisiae C-terminal peptide extension in the hybrid Ribo fraction replicate 2
HYB_RIBO_REP1_SPAR	Total reads mapping to the potential S. paradoxus C-terminal peptide extension in the hybrid Ribo fraction replicate 1
HYB_RIBO_REP2_SPAR	Total reads mapping to the potential S. paradoxus C-terminal peptide extension in the hybrid Ribo fraction replicate 2
BOTH_HYB_REPS_1_SPECIES	Detect reads from both hybrid Ribo replicates in at least 1 species? (0 = no, 1 = yes).
COMB_SCER_HYB	Total reads mapping to the potential S. cerevisiae C-terminal peptide extension in the combined hybrid Ribo fraction replicates
COMP_SPAR_HYB	Total reads mapping to the potential S. paradoxus C-terminal peptide extension in the combined hybrid Ribo fraction replicates
COMB_SCER_PAR	Total reads mapping to the potential S. cerevisiae C-terminal peptide extension in the combined parental Ribo fraction replicates
COMP_SPAR_PAR	Total reads mapping to the potential S. paradoxus C-terminal peptide extension in the combined parental Ribo fraction replicates
KA	Number of non-synonymous subtitutions per non-synonymous site between the orthologous potential C-terminal peptide extensions
KS	Number of synonymous subtitutions per synonymous site between the orthologous potential C-terminal peptide extensions
OMEGA	Ratio of KA/KS
SUBSTITUTIONS	Total count of substitutions between the orthologous potential C-terminal peptide extensions
NON_SYNONYMOUS_SUBSTITUTIONS	Count of non-synonymous substitutions between the orthologous potential C-terminal peptide extensions
SYN_SUBSTITUTIONS	Count of synonymous substitutions between the orthologous potential C-terminal peptide extensions
TRANSL_BOTH_HYB	Is the potential C-terminal peptide extension detectibly translated in both species hybrid data (1 = yes, 0 = no)
TRANSL_BOTH_PARENTS	Is the potential C-terminal peptide extension detectibly translated in both species parental data (1 = yes, 0 = no)
LACK_FRAMESHIFT	The alignment of the potential C-terminal peptide extensions lacks indels introducing frameshifts (1 = yes, 0 = no)
OMEGA_L08	It the KA/KS < 0.8 (1 = yes, 0 = no)
CLASS	Potential C-terminal peptide extensions were classifed into the following:
		GOOD	Meets all criteria for a good candidate (seem Methods)
		POOR	Meets criteria for poor candidate
		FRAMESHIFT	Shows evidence of translation in both potential C-terminal peptide extensions, but alignment includes frameshift mutations
		SCER/SPAR	Potential 3'UTR extension is only detectibly translated in one species.
SCER_ORTHO	SPAR_ORTHO	SGD	STANDARD_NAME	HYB_RIBO_REP1_SCER	HYB_RIBO_REP2_SCER	HYB_RIBO_REP1_SPAR	HYB_RIBO_REP2_SPAR	BOTH_HYB_REPS_1_SPECIES	COMB_SCER_HYB	COMP_SPAR_HYB	COMB_SCER_PAR	COMP_SPAR_PAR	KA	KS	OMEGA	SUBSTITUTIONS	NON_SYNONYMOUS_SUBSTITUTIONS	SYN_SUBSTITUTIONS	TRANSL_BOTH_HYB	TRANSL_BOTH_PARENTS	LACK_FRAMESHIFT	OMEGA_L08	CLASS
Scer_1.103	Spar_1.85	YAR015W	ADE1	0	13	2	5	1	13	7	8	13	0.772476	2.67413	0.28887	18	11.8333	6.16667	1	1	0	1	FRAMESHIFT
Scer_1.77	Spar_1.60	YAL012W	CYS3	2	44	0	9	1	46	9	17	8	0.329863	0.239023	1.38005	9	7	2	1	1	0	0	FRAMESHIFT
Scer_11.118	Spar_11.141	YKL117W	SBA1	0	3	0	6	0	3	6	12	10	NA	NA	NA	4	NA	4	1	1	0	0	FRAMESHIFT
Scer_11.182	Spar_11.202	YKL067W	YNK1	0	9	1	5	1	9	6	4	13	0.3169	1.15621	0.274085	5	3	2	1	1	0	1	FRAMESHIFT
Scer_11.346	Spar_11.371	YKR080W	MTD1	0	10	0	8	0	10	8	0	6	0.298187	0.483268	0.617022	8	6	2	1	0	0	1	FRAMESHIFT
Scer_11.56	Spar_11.76	YKL172W	EBP2	0	29	0	18	0	29	18	3	19	0.300123	0.215004	1.39589	9	7	2	1	1	0	0	FRAMESHIFT
Scer_12.353	Spar_12.322	YLR214W	FRE1	0	10	1	13	1	10	14	7	18	0.223746	0.124638	1.79516	10	8.5	1.5	1	1	0	0	FRAMESHIFT
Scer_12.433	Spar_12.386	YLR270W	DCS1	0	10	0	16	0	10	16	6	7	0.445801	1.26586	0.352173	25	16.5	8.5	1	1	0	1	FRAMESHIFT
Scer_12.464	Spar_12.420	YLR300W	EXG1	0	6	0	13	0	6	13	6	20	0.16831	0.660822	0.254698	15	8	7	1	1	0	1	FRAMESHIFT
Scer_12.535	Spar_12.496	YLR359W	ADE13	3	17	1	10	1	20	11	19	10	0.0892088	0.115639	0.771442	8	6	2	1	1	0	1	FRAMESHIFT
Scer_12.612	Spar_12.563	YLR421C	RPN13	0	3	0	5	0	3	5	6	6	0.155507	0.480241	0.323811	5	3	2	1	1	0	1	FRAMESHIFT
Scer_12.648	Spar_12.592	YLR448W	RPL6B	0	13	5	10	1	13	15	11	4	0.599322	1.10347	0.543127	8	6	2	1	1	0	1	FRAMESHIFT
Scer_13.147	Spar_13.131	YML022W	APT1	2	37	1	16	1	39	17	12	38	1.00401	NA	NA	47	32.75	14.25	1	1	0	0	FRAMESHIFT
Scer_13.18	Spar_13.15	YML126C	ERG13	4	15	6	6	1	19	12	6	56	0.152603	0.46015	0.331638	10	5.75	4.25	1	1	0	1	FRAMESHIFT
Scer_13.269	Spar_13.242	YMR072W	ABF2	1	3	4	21	1	4	25	13	18	0.280247	0.49188	0.569746	15	10.25	4.75	1	1	0	1	FRAMESHIFT
Scer_13.92	Spar_13.91	YML058W	SML1	0	7	2	1	1	7	3	12	15	0.20465	NA	NA	10	4	6	1	1	0	0	FRAMESHIFT
Scer_14.113	Spar_14.102	YNL241C	ZWF1	0	19	2	5	1	19	7	4	5	0.892669	NA	NA	17	11	6	1	1	0	0	FRAMESHIFT
Scer_14.239	Spar_14.227	YNL111C	CYB5	0	6	0	7	0	6	7	1	29	0.60706	1.10461	0.549569	27	19.75	7.25	1	0	0	1	FRAMESHIFT
Scer_14.271	Spar_14.260	YNL079C	TPM1	3	7	5	7	1	10	12	13	25	0.159614	0.513636	0.310754	12	6.5	5.5	1	1	0	1	FRAMESHIFT
Scer_14.73	Spar_14.64	YNL281W	HCH1	2	19	1	12	1	21	13	10	14	0.206218	0.776859	0.265451	9	5	4	1	1	0	1	FRAMESHIFT
Scer_14.99	Spar_14.88	YNL255C	GIS2	0	24	0	16	0	24	16	20	16	0.560545	1.07758	0.520188	18	13.4167	4.58333	1	1	0	1	FRAMESHIFT
Scer_15.268	Spar_15.261	YOR061W	CKA2	0	12	2	4	1	12	6	7	3	0.266547	0.229245	1.16272	17	13.3333	3.66667	1	1	0	0	FRAMESHIFT
Scer_15.270	Spar_15.263	YOR063W	RPL3	0	53	0	16	0	53	16	28	39	0.405539	0.151974	2.66848	5	4.5	0.5	1	1	0	0	FRAMESHIFT
Scer_15.533	Spar_15.507	YOR298C-A	MBF1	2	10	1	32	1	12	33	26	26	0.190777	0.179848	1.06077	10	8	2	1	1	0	0	FRAMESHIFT
Scer_15.71	Spar_15.61	YOL109W	ZEO1	0	21	3	41	1	21	44	12	18	0.392692	3.47855	0.11289	11	6.33333	4.66667	1	1	0	1	FRAMESHIFT
Scer_16.67	Spar_16.86	YPL237W	SUI3	0	6	0	15	0	6	15	3	7	0.0667403	NA	NA	1	1	NA	1	1	0	0	FRAMESHIFT
Scer_2.272	Spar_2.248	YBR089C-A	NHP6B	2	14	0	6	1	16	6	41	8	0.64496	NA	NA	22	14.0833	7.91667	1	1	0	0	FRAMESHIFT
Scer_2.291	Spar_2.267	YBR109C	CMD1	0	7	2	19	1	7	21	13	16	0.274435	0.773605	0.354749	21	12.5	8.5	1	1	0	1	FRAMESHIFT
Scer_4.111	Spar_4.120	YDL145C	COP1	2	13	2	2	1	15	4	9	6	0.385235	NA	NA	23	13.6667	9.33333	1	1	0	0	FRAMESHIFT
Scer_4.113	Spar_4.122	YDL143W	CCT4	3	0	0	6	0	3	6	5	6	0.312397	1.14776	0.27218	17	11.3333	5.66667	1	1	0	1	FRAMESHIFT
Scer_4.201	Spar_4.224	YDL055C	PSA1	1	24	0	10	1	25	10	50	9	0.0673275	0.170838	0.394102	7	4.25	2.75	1	1	0	1	FRAMESHIFT
Scer_4.210	Spar_4.234	YDL046W	NPC2	4	25	0	18	1	29	18	22	16	0.296389	2.3854	0.124251	40	21.6667	18.3333	1	1	0	1	FRAMESHIFT
Scer_4.238	Spar_4.263	YDL015C	TSC13	1	14	3	0	1	15	3	12	5	0.354814	0.414051	0.856932	13	10.5	2.5	1	1	0	0	FRAMESHIFT
Scer_4.261	Spar_4.283	YDR002W	YRB1	3	10	4	1	1	13	5	38	19	0.106565	0.270727	0.393626	5	3	2	1	1	0	1	FRAMESHIFT
Scer_4.296	Spar_4.322	YDR033W	MRH1	5	8	2	16	1	13	18	38	31	0.732893	0.882949	0.830052	36	26.6667	9.33333	1	1	0	0	FRAMESHIFT
Scer_4.449	Spar_4.462	YDR155C	CPR1	0	14	0	10	0	14	10	49	47	NA	1.27922	0	2	NA	2	1	1	0	1	FRAMESHIFT
Scer_4.741	Spar_4.582	YDR377W	ATP17	0	8	0	8	0	8	8	1	8	0.0778513	0.44553	0.174739	4	2	2	1	0	0	1	FRAMESHIFT
Scer_4.764	Spar_4.753	YDR398W	UTP5	5	11	0	6	1	16	6	1	6	0.457695	0.372611	1.22834	15	12.5	2.5	1	0	0	0	FRAMESHIFT
Scer_5.130	Spar_5.157	YER025W	GCD11	0	15	0	6	0	15	6	3	6	0.544293	NA	NA	12	7	5	1	1	0	0	FRAMESHIFT
Scer_5.150	Spar_5.179	YER043C	SAH1	1	4	4	29	1	5	33	15	24	0.66954	1.48102	0.45208	19	13.5	5.5	1	1	0	1	FRAMESHIFT
Scer_5.48	Spar_5.37	YEL040W	UTR2	4	12	0	24	1	16	24	7	13	0.319405	1.19638	0.266978	18	11	7	1	1	0	1	FRAMESHIFT
Scer_5.91	Spar_5.97	YEL009C	GCN4	0	11	0	16	0	11	16	12	30	0.379161	0.75573	0.501715	14	10	4	1	1	0	1	FRAMESHIFT
Scer_7.174	Spar_7.179	YGL105W	ARC1	0	12	0	17	0	12	17	6	9	NA	NA	NA	0	NA	NA	1	1	0	0	FRAMESHIFT
Scer_7.309	Spar_7.317	YGR020C	VMA7	3	2	0	10	1	5	10	10	8	0.255105	0.307784	0.828842	8	6.5	1.5	1	1	0	0	FRAMESHIFT
Scer_7.317	Spar_7.329	YGR027C	RPS25A	4	43	0	16	1	47	16	25	39	0.0481053	0.206559	0.232889	2	1	1	1	1	0	1	FRAMESHIFT
Scer_7.47	Spar_7.44	YGL225W	VRG4	2	8	0	7	1	10	7	9	0	0.648159	NA	NA	4	4	NA	1	0	0	0	FRAMESHIFT
Scer_7.540	Spar_7.527	YGR175C	ERG1	0	5	0	5	0	5	5	1	24	0.495295	NA	NA	13	6.33333	6.66667	1	0	0	0	FRAMESHIFT
Scer_7.544	Spar_7.532	YGR180C	RNR4	2	6	0	4	1	8	4	13	9	0.390943	NA	NA	18	11	7	1	1	0	0	FRAMESHIFT
Scer_7.580	Spar_7.568	YGR211W	ZPR1	0	6	0	33	0	6	33	6	33	0.674272	NA	NA	25	16.1667	8.83333	1	1	0	0	FRAMESHIFT
Scer_8.115	Spar_8.98	YHR026W	VMA16	0	22	3	8	1	22	11	12	4	0.229592	0.242191	0.94798	6	4.5	1.5	1	1	0	0	FRAMESHIFT
Scer_8.161	Spar_8.141	YHR064C	SSZ1	0	22	0	33	0	22	33	6	18	0.29219	0.294728	0.991388	8	6	2	1	1	0	0	FRAMESHIFT
Scer_8.29	Spar_8.20	YHL033C	RPL8A	0	65	0	17	0	65	17	16	10	0.338835	0.55475	0.610788	7	5.5	1.5	1	1	0	1	FRAMESHIFT
Scer_9.147	Spar_9.128	YIL053W	RHR2	1	31	0	4	1	32	4	29	30	0.240126	0.201198	1.19348	3	2.5	0.5	1	1	0	0	FRAMESHIFT
Scer_9.151	Spar_9.130	YIL051C	MMF1	0	8	1	22	1	8	23	20	15	0.484669	0.748795	0.647265	30	21.25	8.75	1	1	0	1	FRAMESHIFT
Scer_9.69	Spar_9.56	YIL118W	RHO3	0	5	0	6	0	5	6	6	5	0.230977	0.239067	0.966159	12	9.5	2.5	1	1	0	0	FRAMESHIFT
Scer_10.91	Spar_10.91	YJL143W	TIM17	9	14	0	1	1	23	1	14	6	0.506938	NA	NA	15	10.25	4.75	0	1	0	0	FRAMESHIFT
Scer_12.71	Spar_12.55	YLL018C	DPS1	0	16	0	0	0	16	0	16	9	0.583278	inf	0	7	5	2	0	1	0	1	FRAMESHIFT
Scer_15.305	Spar_15.301	YOR094W	ARF3	0	8	0	0	0	8	0	5	3	0.165213	0.517584	0.319201	21	12	9	0	1	0	1	FRAMESHIFT
Scer_16.388	Spar_16.408	YPR062W	FCY1	2	17	0	1	1	19	1	14	7	0.468779	NA	NA	23	13.8333	9.16667	0	1	0	0	FRAMESHIFT
Scer_2.183	Spar_2.156	YBR015C	MNN2	1	33	0	0	1	34	0	8	4	0.948848	2.17287	0.436679	50	36.8333	13.1667	0	1	0	1	FRAMESHIFT
Scer_4.335	Spar_4.353	YDR054C	CDC34	0	16	0	0	0	16	0	6	3	0.829094	NA	NA	37	26.6667	10.3333	0	1	0	0	FRAMESHIFT
Scer_4.376	Spar_4.396	YDR091C	RLI1	0	11	0	0	0	11	0	7	4	0.150762	NA	NA	7	7	NA	0	1	0	0	FRAMESHIFT
Scer_4.754	Spar_4.739	YDR388W	RVS167	0	6	1	0	0	6	1	7	5	0.508414	0.506724	1.00333	31	24.3333	6.66667	0	1	0	0	FRAMESHIFT
Scer_4.846	Spar_4.848	YDR480W	DIG2	8	0	0	0	0	8	0	5	6	0.224256	0.575234	0.389852	19	11.5	7.5	0	1	0	1	FRAMESHIFT
Scer_5.110	Spar_5.132	YER009W	NTF2	0	24	0	1	0	24	1	16	22	0.675752	NA	NA	15	9	6	0	1	0	0	FRAMESHIFT
Scer_5.189	Spar_5.222	YER072W	VTC1	0	21	0	1	0	21	1	41	10	0.316401	0.660484	0.479045	16	11	5	0	1	0	1	FRAMESHIFT
Scer_8.260	Spar_8.245	YHR148W	IMP3	0	14	0	1	0	14	1	9	9	0.293764	1.21374	0.242032	22	12	10	0	1	0	1	FRAMESHIFT
Scer_11.131	Spar_11.154	YKL104C	GFA1	0	0	0	8	0	0	8	7	21	0.342062	NA	NA	32	14.5	17.5	0	1	0	0	FRAMESHIFT
Scer_14.236	Spar_14.224	YNL113W	RPC19	0	0	12	11	1	0	23	10	22	0.559794	1.43724	0.389492	11	7	4	0	1	0	1	FRAMESHIFT
Scer_16.180	Spar_16.198	YPL127C	HHO1	2	0	0	22	0	2	22	3	21	0.654045	NA	NA	40	25.5	14.5	0	1	0	0	FRAMESHIFT
Scer_16.291	Spar_16.307	YPL028W	ERG10	1	3	0	10	1	4	10	3	8	0.143291	2.12491	0.0674341	6	2	4	1	1	0	1	FRAMESHIFT
Scer_16.435	Spar_16.464	YPR110C	RPC40	0	0	0	6	0	0	6	6	18	NA	0.389318	0	1	NA	1	0	1	0	1	FRAMESHIFT
Scer_2.450	Spar_2.429	YBR252W	DUT1	0	0	0	15	0	0	15	8	9	0.405041	NA	NA	14	7.5	6.5	0	1	0	0	FRAMESHIFT
Scer_3.169	Spar_3.159	YCR057C	PWP2	0	0	0	19	0	0	19	4	6	0.111803	0.180129	0.620681	6	4	2	0	1	0	1	FRAMESHIFT
Scer_3.95	Spar_3.83	YCR004C	YCP4	0	0	0	13	0	0	13	3	5	0.633624	0.369357	1.71548	7	5.5	1.5	0	1	0	0	FRAMESHIFT
Scer_4.47	Spar_4.52	YDL212W	SHR3	0	12	0	1	0	12	1	12	18	0.323427	NA	NA	19	9.66667	9.33333	0	1	0	0	FRAMESHIFT
Scer_4.731	Spar_4.592	YDR368W	YPR1	0	1	0	11	0	1	11	3	9	1.08559	NA	NA	24	14	10	0	1	0	0	FRAMESHIFT
Scer_8.219	Spar_8.200	YHR116W	COX23	0	0	0	5	0	0	5	7	6	0.351361	NA	NA	13	6.66667	6.33333	0	1	0	0	FRAMESHIFT
Scer_10.380	Spar_10.367	YJR091C	JSN1	3	6	3	0	1	9	3	9	0	0.524788	1.66169	0.315816	37	24.8333	12.1667	1	0	0	1	FRAMESHIFT
Scer_4.697	Spar_4.616	YDR346C	SVF1	2	9	0	4	1	11	4	9	0	0.38532	NA	NA	12	6	6	1	0	0	0	FRAMESHIFT
Scer_2.442	Spar_2.420	YBR244W	GPX2	0	4	0	7	0	4	7	0	5	1.54059	NA	NA	3	3	NA	1	0	0	0	FRAMESHIFT
Scer_4.357	Spar_4.376	YDR074W	TPS2	0	3	0	13	0	3	13	1	7	0.808836	1.45467	0.556025	46	33.1667	12.8333	1	0	0	1	FRAMESHIFT
Scer_10.75	Spar_10.76	YJL158C	CIS3	0	6	0	8	0	6	8	6	26	0.0774588	NA	NA	1	1	NA	1	1	1	1	GOOD
Scer_12.315	Spar_12.284	YLR175W	CBF5	9	5	12	19	1	14	31	24	32	0.046543	NA	NA	1	1	NA	1	1	1	1	GOOD
Scer_12.514	Spar_12.470	YLR340W	RPP0	0	30	0	19	0	30	19	18	24	0.0522147	NA	NA	1	1	NA	1	1	1	1	GOOD
Scer_13.141	Spar_13.125	YML028W	TSA1	0	8	0	7	0	8	7	12	14	0.0779923	NA	NA	1	1	NA	1	1	1	1	GOOD
Scer_13.494	Spar_13.453	YMR260C	TIF11	7	1	1	62	1	8	63	31	37	0.0908602	0.269388	0.337283	7	4	3	1	1	1	1	GOOD
Scer_13.551	Spar_13.506	YMR307W	GAS1	0	6	0	4	0	6	4	6	10	0.0795746	0.61718	0.128933	3	1	2	1	1	1	1	GOOD
Scer_15.104	Spar_15.91	YOL086C	ADH1	0	39	0	58	0	39	58	41	61	NA	0.635473	0	1	NA	1	1	1	1	1	GOOD
Scer_15.38	Spar_15.27	YOL143C	RIB4	0	12	0	9	0	12	9	4	6	0.153805	0.344819	0.446046	6	4	2	1	1	1	1	GOOD
Scer_16.176	Spar_16.194	YPL131W	RPL5	0	4	0	25	0	4	25	17	31	0.105436	NA	NA	1	1	NA	1	1	1	1	GOOD
Scer_16.249	Spar_16.268	YPL061W	ALD6	5	63	5	32	1	68	37	24	40	0.0599816	0.103915	0.57722	3	2	1	1	1	1	1	GOOD
Scer_16.70	Spar_16.89	YPL234C	VMA11	2	4	0	28	1	6	28	5	6	0.0975984	0.142234	0.686184	8	6	2	1	1	1	1	GOOD
Scer_2.193	Spar_2.166	YBR025C	OLA1	0	20	8	70	1	20	78	14	55	0.120673	0.435201	0.27728	6	3	3	1	1	1	1	GOOD
Scer_2.480	Spar_2.459	YBR283C	SSH1	1	5	0	5	1	6	5	5	9	0.040356	0.145781	0.276827	6	3	3	1	1	1	1	GOOD
Scer_3.108	Spar_3.98	YCR012W	PGK1	1	40	0	43	1	41	43	18	24	NA	NA	NA	0	NA	NA	1	1	1	1	GOOD
Scer_4.533	Spar_4.528	YDR214W	AHA1	0	11	2	19	1	11	21	9	9	0.541849	1.33841	0.404845	22	15.9167	6.08333	1	1	1	1	GOOD
Scer_5.169	Spar_5.199	YER056C-A	RPL34A	0	20	0	18	0	20	18	10	14	0.074405	NA	NA	2	2	NA	1	1	1	1	GOOD
Scer_7.260	Spar_7.268	YGL031C	RPL24A	0	41	0	10	0	41	10	11	35	0.0227894	NA	NA	1	1	NA	1	1	1	1	GOOD
Scer_9.47	Spar_9.34	YIL138C	TPM2	12	0	6	11	1	12	17	30	25	0.100593	0.144698	0.695193	13	9	4	1	1	1	1	GOOD
Scer_12.569	Spar_12.528	YLR390W-A	CCW14	1	3	2	11	1	4	13	3	6	0.0508669	0.167358	0.303942	2	1	1	1	1	1	1	GOOD
Scer_15.42	Spar_15.31	YOL139C	CDC33	0	30	0	24	0	30	24	0	9	NA	0.338989	0	1	NA	1	1	0	1	1	POOR
Scer_10.237	Spar_10.238	YJL026W	RNR2	1	6	3	5	1	7	8	4	18	0.0558683	0.0426328	1.31045	6	5	1	1	1	1	0	POOR
Scer_10.325	Spar_10.315	YJR048W	CYC1	0	21	2	19	1	21	21	4	15	0.19151	0.177292	1.0802	5	4	1	1	1	1	0	POOR
Scer_12.332	Spar_12.300	YLR192C	HCR1	2	32	1	25	1	34	26	11	11	0.172489	0.0755195	2.28403	7	6.25	0.75	1	1	1	0	POOR
Scer_13.157	Spar_13.141	YML012W	ERV25	3	5	0	11	1	8	11	10	14	0.100623	0.0602165	1.67103	7	6	1	1	1	1	0	POOR
Scer_13.73	Spar_13.69	YML074C	FPR3	0	16	0	25	0	16	25	4	23	0.344554	NA	NA	8	3.66667	4.33333	1	1	1	0	POOR
Scer_16.342	Spar_16.362	YPR016C	TIF6	4	22	1	5	1	26	6	6	12	0.042091	NA	NA	5	5	NA	1	1	1	0	POOR
Scer_2.383	Spar_2.363	YBR196C	PGI1	0	5	4	3	1	5	7	0	17	0.289247	0.338989	0.853264	3	2	1	1	0	1	0	POOR
Scer_10.279	Spar_10.286	YJR014W	TMA22	1	5	0	3	1	6	3	6	2	0.111495	0.114842	0.970859	5	4	1	1	0	1	0	POOR
Scer_11.308	Spar_11.333	YKR042W	UTH1	0	7	0	0	0	7	0	6	3	0.260575	NA	NA	2	2	NA	0	1	1	0	POOR
Scer_12.155	Spar_12.134	YLR058C	SHM2	0	12	0	3	0	12	3	6	3	0.267425	0.401299	0.666398	5	4	1	1	1	1	1	POOR
Scer_12.431	Spar_12.384	YLR268W	SEC22	0	5	2	0	0	5	2	5	12	0.11385	0.139957	0.813462	7	5	2	0	1	1	0	POOR
Scer_16.154	Spar_16.173	YPL154C	PEP4	0	6	0	0	0	6	0	5	3	0.168361	0.163937	1.02699	9	7	2	0	1	1	0	POOR
Scer_16.217	Spar_16.234	YPL094C	SEC62	6	23	0	0	1	29	0	5	7	0.158769	0.262358	0.605162	5	3	2	0	1	1	1	POOR
Scer_11.331	Spar_11.356	YKR066C	CCP1	0	0	0	5	0	0	5	7	7	0.218363	0.212454	1.02781	13	10	3	0	1	1	0	POOR
Scer_12.584	Spar_12.545	YLR406C	RPL31B	0	2	0	41	0	2	41	5	13	0.246207	NA	NA	3	3	NA	0	1	1	0	POOR
Scer_15.546	Spar_15.521	YOR310C	NOP58	0	0	0	9	0	0	9	3	8	0.0522147	0.288634	0.180903	2	1	1	0	1	1	1	POOR
Scer_15.572	Spar_15.547	YOR335C	ALA1	0	0	0	9	0	0	9	7	5	0.115315	0.226719	0.508625	7	5	2	0	1	1	1	POOR
Scer_3.81	Spar_3.68	YCL011C	GBP2	0	11	0	0	0	11	0	8	4	0.145159	0.106023	1.36913	6	5	1	0	1	1	0	POOR
Scer_4.452	Spar_4.465	YDR158W	HOM2	0	2	0	7	0	2	7	12	7	0.100308	0.08287	1.21043	6	5	1	0	1	1	0	POOR
Scer_4.793	Spar_4.797	YDR429C	TIF35	0	0	0	13	0	0	13	6	5	0.139393	0.174713	0.797837	4	3	1	0	1	1	1	POOR
Scer_5.220	Spar_5.262	YER094C	PUP3	0	1	2	17	1	1	19	6	9	0.216586	0.153764	1.40857	17	14	3	0	1	1	0	POOR
Scer_7.500	Spar_7.493	YGR155W	CYS4	0	3	2	38	1	3	40	9	31	0.103176	0.0507433	2.0333	8	7	1	1	1	1	0	POOR
Scer_7.80	Spar_7.78	YGL200C	EMP24	0	0	0	21	0	0	21	17	18	0.113565	0.0694988	1.63405	7	6	1	0	1	1	0	POOR
Scer_8.274	Spar_8.259	YHR162W	MPC2	0	2	0	34	0	2	34	12	28	0.0306948	0.123993	0.247553	4	2	2	0	1	1	1	POOR
Scer_9.184	Spar_9.166	YIL022W	TIM44	3	0	2	14	1	3	16	5	15	0.0497953	NA	NA	2	2	NA	1	1	1	1	POOR
Scer_9.214	Spar_9.197	YIL002W-A	NA	0	0	0	21	0	0	21	4	7	0.13191	0.749117	0.176088	11	5	6	0	1	1	1	POOR
Scer_11.125	Spar_11.148	YKL109W	HAP4	0	3	0	11	0	3	11	0	24	0.0260059	NA	NA	1	1	NA	1	0	1	0	POOR
Scer_16.26	Spar_16.46	YPL266W	DIM1	0	3	0	8	0	3	8	1	8	0.162798	0.275794	0.590291	3	2	1	1	0	1	1	POOR
Scer_12.503	Spar_12.459	YLR330W	CHS5	6	10	0	0	1	16	0	10	0	0.394784	NA	NA	15	8.5	6.5	0	0	0	0	SCER
Scer_10.438	Spar_10.428	YJR143C	PMT4	0	9	0	0	0	9	0	5	2	0.134364	1.3912	0.0965811	5	2	3	0	0	1	1	SCER
Scer_13.214	Spar_13.203	YMR038C	CCS1	2	7	0	0	1	9	0	7	2	0.29817	0.689868	0.432213	6	4.16667	1.83333	0	0	0	1	SCER
Scer_15.122	Spar_15.109	YOL068C	HST1	100	315	0	0	1	415	0	1398	1	0.195187	NA	NA	10	4.5	5.5	0	0	0	0	SCER
Scer_15.52	Spar_15.42	YOL128C	YGK3	15	14	0	0	1	29	0	49	0	0.431523	NA	NA	7	3.5	3.5	0	0	0	0	SCER
Scer_15.529	Spar_15.503	YOR295W	UAF30	5	0	0	0	0	5	0	7	0	0.189398	0.430906	0.439535	6	4	2	0	0	0	1	SCER
Scer_16.138	Spar_16.157	YPL170W	DAP1	0	5	0	0	0	5	0	5	2	0.283606	1.27242	0.222886	37	21.75	15.25	0	0	0	1	SCER
Scer_16.356	Spar_16.377	YPR028W	YOP1	3	4	0	0	1	7	0	25	2	1.04707	1.33755	0.78283	26	19.6667	6.33333	0	0	0	1	SCER
Scer_16.80	Spar_16.99	YPL224C	MMT2	10	5	0	0	1	15	0	24	0	0.672752	NA	NA	12	9.08333	2.91667	0	0	0	0	SCER
Scer_3.159	Spar_3.149	YCR043C	NA	0	22	0	0	0	22	0	9	2	0.0458158	0.146808	0.312079	2	1	1	0	0	0	1	SCER
Scer_4.127	Spar_4.149	YDL130W	RPP1B	2	95	0	0	1	97	0	54	0	0.718873	1.40024	0.513394	9	6.5	2.5	0	0	0	1	SCER
Scer_4.219	Spar_4.245	YDL036C	PUS9	0	6	0	0	0	6	0	5	0	NA	0.974462	0	2	NA	2	0	0	1	1	SCER
Scer_4.633	Spar_4.673	YDR297W	SUR2	0	5	0	0	0	5	0	13	0	NA	NA	NA	0	NA	NA	0	0	0	0	SCER
Scer_4.676	Spar_4.708	YDR328C	SKP1	5	2	0	0	1	7	0	26	2	0.343164	0.411337	0.834266	18	13	5	0	0	0	0	SCER
Scer_7.176	Spar_7.181	YGL103W	RPL28	1	100	0	0	1	101	0	71	0	0.716634	NA	NA	2	1	1	0	0	0	0	SCER
Scer_7.405	Spar_7.394	YGR083C	GCD2	0	23	0	3	0	23	3	7	0	0.162438	0.277895	0.584531	6	4	2	1	0	0	1	SCER
Scer_7.429	Spar_7.420	YGR106C	VOA1	0	9	0	1	0	9	1	7	1	0.167483	0.0998582	1.67721	5	4.33333	0.666667	0	0	0	0	SCER
Scer_7.530	Spar_7.514	YGR167W	CLC1	0	5	0	0	0	5	0	11	1	0.486967	1.70795	0.285118	5	3.5	1.5	0	0	0	1	SCER
Scer_7.546	Spar_7.535	YGR181W	TIM13	0	16	0	0	0	16	0	7	0	0.228495	0.492585	0.46387	2	1.5	0.5	0	0	0	1	SCER
Scer_2.205	Spar_2.179	YBR037C	SCO1	0	0	0	15	0	0	15	0	6	0.40365	1.08872	0.370756	14	10	4	0	0	0	1	SPAR
Scer_1.49	Spar_1.31	YAL036C	RBG1	0	0	1	5	1	0	6	0	11	NA	NA	NA	0	NA	NA	0	0	0	1	SPAR
Scer_11.129	Spar_11.152	YKL106W	AAT1	0	0	0	5	0	0	5	1	5	0.182226	1.52886	0.119191	14	7	7	0	0	0	1	SPAR
Scer_11.140	Spar_11.162	YKL096W	CWP1	0	0	6	4	1	0	10	0	10	0.090745	0.313776	0.289203	5	2.5	2.5	0	0	0	1	SPAR
Scer_11.209	Spar_11.229	YKL040C	NFU1	0	0	0	26	0	0	26	1	8	0.96929	0.798676	1.21362	16	13	3	0	0	0	0	SPAR
Scer_11.313	Spar_11.338	YKR048C	NAP1	0	0	0	15	0	0	15	2	27	1.23615	0.609724	2.02739	15	12	3	0	0	0	0	SPAR
Scer_11.42	Spar_11.63	YKL186C	MTR2	0	0	0	20	0	0	20	1	8	0.313119	0.276288	1.13331	9	7	2	0	0	1	0	SPAR
Scer_12.217	Spar_12.199	YLR120C	YPS1	0	0	0	7	0	0	7	1	6	NA	NA	NA	0	NA	NA	0	0	1	0	SPAR
Scer_12.309	Spar_12.278	YLR168C	UPS2	1	0	0	5	0	1	5	2	16	0.313698	0.823676	0.380851	26	16.8333	9.16667	0	0	0	1	SPAR
Scer_12.326	Spar_12.294	YLR186W	EMG1	0	0	0	20	0	0	20	0	6	0.0957603	0.316152	0.302893	4	2	2	0	0	1	1	SPAR
Scer_12.347	Spar_12.316	YLR208W	SEC13	0	0	6	13	1	0	19	0	8	0.280287	1.11321	0.251784	5	2.5	2.5	0	0	1	1	SPAR
Scer_12.553	Spar_12.512	YLR375W	STP3	0	0	0	5	0	0	5	0	5	0.510658	NA	NA	6	3.33333	2.66667	0	0	0	0	SPAR
Scer_12.98	Spar_12.80	YLR009W	RLP24	0	0	3	12	1	0	15	1	8	0.0652093	0.305187	0.21367	6	3	3	0	0	1	1	SPAR
Scer_13.416	Spar_13.388	YMR193W	MRPL24	0	0	2	6	1	0	8	2	7	0.389547	1.05386	0.369637	15	10.1667	4.83333	0	0	0	1	SPAR
Scer_13.549	Spar_13.504	YMR305C	SCW10	0	0	0	15	0	0	15	0	18	0.723198	3.2075	0.225471	13	8	5	0	0	0	1	SPAR
Scer_14.398	Spar_14.385	YNR021W	NA	2	0	1	27	1	2	28	1	10	0.382416	NA	NA	15	8	7	0	0	0	0	SPAR
Scer_15.178	Spar_15.167	YOL019W	NA	0	1	0	5	0	1	5	0	5	0.476523	2.31915	0.205473	19	12.8333	6.16667	0	0	0	1	SPAR
Scer_15.272	Spar_15.265	YOR065W	CYT1	0	0	0	5	0	0	5	0	14	NA	NA	NA	0	NA	NA	0	0	0	0	SPAR
Scer_15.453	Spar_15.423	YOR217W	RFC1	0	0	0	18	0	0	18	0	5	0.36222	1.5569	0.232655	8	4.5	3.5	0	0	0	1	SPAR
Scer_15.494	Spar_15.465	YOR260W	GCD1	0	0	1	4	1	0	5	1	7	0.28252	0.889218	0.317717	8	5	3	0	0	0	1	SPAR
Scer_16.306	Spar_16.325	YPL013C	MRPS16	0	0	15	106	1	0	121	0	236	0.164839	0.147798	1.1153	7	6	1	0	0	0	0	SPAR
Scer_2.345	Spar_2.322	YBR162C	TOS1	0	0	0	27	0	0	27	0	7	0.514851	0.281444	1.82932	5	4	1	0	0	0	0	SPAR
Scer_4.714	Spar_4.602	YDR361C	BCP1	0	0	0	16	0	0	16	0	32	0.219181	NA	NA	4	2	2	0	0	0	0	SPAR
Scer_5.100	Spar_5.122	YER001W	MNN1	0	0	0	6	0	0	6	0	6	0.733311	NA	NA	14	10.5	3.5	0	0	0	0	SPAR
Scer_5.101	Spar_5.123	YER002W	NOP16	0	0	0	41	0	0	41	1	7	0.693826	NA	NA	17	10.5	6.5	0	0	0	0	SPAR
Scer_5.140	Spar_5.170	YER034W	NA	0	0	4	10	1	0	14	0	9	NA	NA	NA	0	NA	NA	0	0	0	0	SPAR
Scer_5.176	Spar_5.207	YER062C	HOR2	0	0	0	8	0	0	8	1	13	0.696954	1.02431	0.680411	10	7.5	2.5	0	0	0	1	SPAR
Scer_5.256	Spar_5.298	YER125W	RSP5	0	1	0	5	0	1	5	0	11	0.516875	1.25335	0.412395	33	23	10	0	0	0	1	SPAR
Scer_5.94	Spar_5.116	YEL006W	YEA6	0	0	0	13	0	0	13	0	11	0.202	0.298684	0.6763	4	3	1	0	0	1	1	SPAR
Scer_7.125	Spar_7.122	YGL156W	AMS1	0	0	8	10	1	0	18	0	44	0.233816	0.623228	0.375168	7	4	3	0	0	0	1	SPAR
Scer_7.180	Spar_7.185	YGL098W	USE1	0	0	0	5	0	0	5	1	6	0.603935	0.955446	0.632097	29	22	7	0	0	0	1	SPAR
Scer_7.222	Spar_7.231	YGL058W	RAD6	0	0	6	11	1	0	17	0	8	0.362272	0.974719	0.371668	6	4.25	1.75	0	0	1	1	SPAR
Scer_7.400	Spar_7.389	YGR078C	PAC10	0	0	0	19	0	0	19	0	5	0.562729	NA	NA	15	9.5	5.5	0	0	0	0	SPAR
Scer_7.505	Spar_7.498	YGR161C	RTS3	0	0	0	19	0	0	19	2	13	0.165369	1.60256	0.10319	8	4	4	0	0	0	1	SPAR
Scer_7.60	Spar_7.57	YGL209W	MIG2	1	0	0	7	0	1	7	2	6	0.298979	0.716634	0.4172	10	6	4	0	0	0	1	SPAR
Scer_7.63	Spar_7.60	YGL206C	CHC1	0	0	0	23	0	0	23	1	10	0.391349	1.07458	0.364189	25	16.5	8.5	0	0	0	1	SPAR
Scer_8.114	Spar_8.97	YHR025W	THR1	0	0	0	35	0	0	35	2	15	0.326349	NA	NA	3	3	NA	0	0	0	0	SPAR
Scer_8.120	Spar_8.103	YHR030C	SLT2	0	0	0	6	0	0	6	0	5	0.109076	NA	NA	3	1	2	0	0	0	0	SPAR
Scer_8.168	Spar_8.149	YHR071W	PCL5	0	0	0	16	0	0	16	0	6	0.553498	0.29346	1.88611	12	10.5	1.5	0	0	0	0	SPAR
Scer_8.171	Spar_8.152	YHR072W	ERG7	0	0	4	7	1	0	11	2	5	0.0740653	0.143811	0.515016	3	2	1	0	0	1	1	SPAR
Scer_8.264	Spar_8.249	YHR152W	SPO12	0	0	0	16	0	0	16	1	7	0.410094	1.42405	0.287978	6	3.5	2.5	0	0	0	1	SPAR
