# Supplementary material for: Evolution at two levels of gene expression in yeast
Source: HighWire-hosted journal article supplement (doi:10.1101/gr.165522.113), 2013-12-06
Supplement: Supplemental_Table_S5.xlsx [file Supplemental_Table_S5.xlsx]

## Sheet: Sheet1
Supplementary Table S5. Orthologs with Ribo fraction reads mapping to their 5' UTRs.
SCER_ORTHO	The S. cerevisiae ortholog
SPAR_ORTHO	The S. paradoxus ortholog
SGD	Saccharomyces Genome Database name
STANDARD_NAME	Standard three-letter gene name
RIBO_REP1_SCER_COUNTS	S. cerevisiae read counts in hybrid replicate 1
RIBO_REP2_SCER_COUNTS	S. cerevisiae read counts in hybrid replicate 2
RIBO_REP1_SPAR_COUNTS	S. paradoxus read counts in hybrid replicate 1
RIBO_REP2_SPAR_COUNTS	S. paradoxus read counts in hybrid replicate 2
TRANSL_SCER	Evidence of UTR translation in S. cerevisiae (1= yes, 0 = no)
TRANSL_SPAR	Evidence of UTR translation in S. paradoxus (1= yes, 0 = no)
TRANSL_BOTH	Evidence of UTR translation in both species (1= yes, 0 = no)
SCER_SPECIFIC	Evidence of UTR translation ONLY in S. cerevisiae (1= yes, 0 = no)
SPAR_SPECIFIC	Evidence of UTR translation ONLY in S. paradoxus (1= yes, 0 = no)
SIG_TRANSL_CIS_SCER	Ortholog shows significant cis regulatory divergence in translational efficiency favoring the S. cerevisiae allele (1 = yes, 0 = no)
SIG_TRANSL_CIS_SPAR	Ortholog shows significant cis regulatory divergence in translational efficiency favoring the S. paradoxus allele (1 = yes, 0 = no)
SCER_ORTHO	SPAR_ORTHO	SGD	STANDARD_NAME	RIBO_REP1_SCER_COUNTS	RIBO_REP2_SCER_COUNTS	RIBO_REP1_SPAR_COUNTS	RIBO_REP2_SPAR_COUNTS	TRANSL_SCER	TRANSL_SPAR	TRANSL_BOTH	SCER_SPECIFIC	SPAR_SPECIFIC	SIG_TRANSL_CIS_SCER	SIG_TRANSL_CIS_SPAR																				SCER_ORTHO	MONO_CIS_SPAR	SUM_SCER	SUM_SPAR	TYPE
Scer_1.103	Spar_1.85	YAR015W	ADE1	0	2	0	0	0	0	0	0	0	1	0																				Scer_12.347	1	2	0	GOOD
Scer_10.243	Spar_10.250	YJL019W	MPS3	5	0	2	0	0	0	0	0	0	1	0																				Scer_13.504	0	5	2	GOOD
Scer_10.263	Spar_10.271	YJR001W	AVT1	9	7	0	0	1	0	0	1	0	1	0																				Scer_14.428	0	16	0	GOOD
Scer_10.352	Spar_10.338	YJR060W	CBF1	3	0	0	1	0	0	0	0	0	1	0																				Scer_14.91	0	3	1	GOOD
Scer_10.434	Spar_10.424	YJR139C	HOM6	10	37	0	3	1	0	0	0	0	1	0																				Scer_16.131	1	47	3	GOOD
Scer_10.438	Spar_10.428	YJR143C	PMT4	0	8	0	0	0	0	0	0	0	1	0																				Scer_16.369	0	8	0	GOOD
Scer_10.439	Spar_10.429	YJR144W	MGM101	0	12	0	0	0	0	0	0	0	1	0																				Scer_4.111	1	12	0	GOOD
Scer_10.58	Spar_10.56	YJL174W	KRE9	17	34	13	35	1	1	1	0	0	1	0																				Scer_4.697	1	51	48	GOOD
Scer_10.86	Spar_10.86	YJL148W	RPA34	0	0	0	2	0	0	0	0	0	1	0																				Scer_5.256	0	0	2	GOOD
Scer_11.109	Spar_11.133	YKL125W	RRN3	6	0	5	16	0	1	0	0	0	1	0																				Scer_7.277	0	6	21	GOOD
Scer_11.131	Spar_11.154	YKL104C	GFA1	19	11	42	7	1	1	1	0	0	1	0																				Scer_7.286	1	30	49	GOOD
Scer_11.134	Spar_11.157	YKL101W	HSL1	16	4	9	4	0	0	0	0	0	1	0																				Scer_7.502	1	20	13	GOOD
Scer_11.135	Spar_11.158	YKL100C	NA	0	8	0	0	0	0	0	0	0	1	0																				Scer_8.53	0	8	0	GOOD
Scer_11.144	Spar_11.166	YKL092C	BUD2	2	0	4	0	0	0	0	0	0	1	0																				Scer_10.58	0	2	4	NS
Scer_11.162	Spar_11.185	YKL072W	STB6	0	11	0	0	0	0	0	0	0	1	0																				Scer_11.52	1	11	0	NS
Scer_11.17	Spar_11.20	YKL210W	UBA1	0	5	8	0	0	0	0	0	0	1	0																				Scer_12.227	1	5	8	NS
Scer_11.244	Spar_11.272	YKL007W	CAP1	0	0	0	1	0	0	0	0	0	1	0																				Scer_12.449	1	0	1	NS
Scer_11.252	Spar_11.280	YKR001C	VPS1	0	0	1	1	0	0	0	0	0	1	0																				Scer_12.658	0	0	2	NS
Scer_11.295	Spar_11.323	YKR036C	CAF4	1	0	0	0	0	0	0	0	0	1	0																				Scer_12.79	1	1	0	NS
Scer_11.308	Spar_11.333	YKR042W	UTH1	25	87	32	76	1	1	1	0	0	1	0																				Scer_4.70	1	112	108	NS
Scer_11.44	Spar_11.65	YKL184W	SPE1	32	10	6	6	1	1	1	0	0	1	0																				Scer_4.735	1	42	12	NS
Scer_11.52	Spar_11.72	YKL176C	LST4	12	23	8	29	1	1	1	0	0	1	0																				Scer_5.254	1	35	37	NS
Scer_12.168	Spar_12.147	YLR072W	NA	0	0	0	5	0	0	0	0	0	1	0																				Scer_7.317	0	0	5	NS
Scer_12.199	Spar_12.178	YLR104W	LCL2	0	3	0	0	0	0	0	0	0	1	0																				Scer_7.343	0	3	0	NS
Scer_12.211	Spar_12.193	YLR114C	AVL9	0	0	0	8	0	0	0	0	0	1	0																				Scer_1.77	1	0	8	OP
Scer_12.217	Spar_12.199	YLR120C	YPS1	3	0	20	33	0	1	0	0	0	1	0																				Scer_11.193	0	3	53	OP
Scer_12.349	Spar_12.318	YLR210W	CLB4	0	2	0	0	0	0	0	0	0	1	0																				Scer_14.195	0	2	0	OP
Scer_12.442	Spar_12.398	YLR277C	YSH1	2	0	17	1	0	0	0	0	0	1	0																				Scer_15.183	0	2	18	OP
Scer_12.464	Spar_12.420	YLR300W	EXG1	11	7	9	2	1	0	0	0	0	1	0																				Scer_16.521	1	18	11	OP
Scer_12.47	Spar_12.28	YLL039C	UBI4	8	34	32	62	1	1	1	0	0	1	0																				Scer_2.111	1	42	94	OP
Scer_12.56	Spar_12.39	YLL029W	FRA1	14	16	9	12	1	1	1	0	0	1	0																				Scer_4.355	1	30	21	OP
Scer_12.57	Spar_12.40	YLL028W	TPO1	2	0	11	3	0	0	0	0	0	1	0																				Scer_4.858	0	2	14	OP
Scer_12.586	Spar_12.546	YLR407W	NA	46	39	4	13	1	0	0	0	0	1	0																				Scer_6.81	1	85	17	OP
Scer_12.589	Spar_12.549	YLR410W	VIP1	1	0	0	0	0	0	0	0	0	1	0																				Scer_7.239	1	1	0	OP
Scer_12.601	Spar_12.553	YLR413W	NA	0	0	0	8	0	0	0	0	0	1	0																				Scer_7.245	1	0	8	OP
Scer_12.651	Spar_12.595	YLR451W	LEU3	5	4	0	0	0	0	0	0	0	1	0																				Scer_7.60	0	9	0	OP
Scer_12.658	Spar_12.603	YLR455W	NA	16	44	23	30	1	1	1	0	0	1	0																				Scer_7.601	0	60	53	OP
Scer_12.68	Spar_12.52	YLL021W	SPA2	4	0	3	7	0	0	0	0	0	1	0																				Scer_9.38	1	4	10	OP
Scer_12.76	Spar_12.59	YLL013C	PUF3	25	43	59	84	1	1	1	0	0	1	0
Scer_12.77	Spar_12.60	YLL012W	YEH1	2	9	1	4	0	0	0	0	0	1	0
Scer_12.91	Spar_12.73	YLR002C	NOC3	0	0	0	4	0	0	0	0	0	1	0
Scer_13.14	Spar_13.11	YML130C	ERO1	1	0	0	0	0	0	0	0	0	1	0
Scer_13.147	Spar_13.131	YML022W	APT1	5	15	1	28	1	0	0	0	0	1	0
Scer_13.157	Spar_13.141	YML012W	ERV25	0	0	4	0	0	0	0	0	0	1	0
Scer_13.180	Spar_13.166	YMR009W	ADI1	0	4	0	2	0	0	0	0	0	1	0
Scer_13.184	Spar_13.172	YMR012W	CLU1	0	20	2	8	0	0	0	0	0	1	0
Scer_13.21	Spar_13.18	YML123C	PHO84	0	0	1	1	0	0	0	0	0	1	0
Scer_13.24	Spar_13.21	YML120C	NDI1	0	2	0	0	0	0	0	0	0	1	0
Scer_13.28	Spar_13.25	YML116W	ATR1	3	0	0	0	0	0	0	0	0	1	0
Scer_13.287	Spar_13.261	YMR088C	VBA1	0	3	3	0	0	0	0	0	0	1	0
Scer_13.290	Spar_13.264	YMR091C	NPL6	0	0	3	0	0	0	0	0	0	1	0
Scer_13.292	Spar_13.266	YMR093W	UTP15	0	9	0	2	0	0	0	0	0	1	0
Scer_13.411	Spar_13.383	YMR188C	MRPS17	0	0	0	6	0	0	0	0	0	1	0
Scer_13.455	Spar_13.411	YMR229C	RRP5	1	0	0	9	0	0	0	0	0	1	0
Scer_13.461	Spar_13.417	YMR234W	RNH1	4	0	3	0	0	0	0	0	0	1	0
Scer_13.489	Spar_13.448	YMR255W	GFD1	0	14	0	0	0	0	0	0	0	1	0
Scer_13.539	Spar_13.494	YMR296C	LCB1	4	18	1	0	0	0	0	0	0	1	0
Scer_13.552	Spar_13.507	YMR308C	PSE1	17	36	3	8	1	0	0	0	0	1	0
Scer_13.60	Spar_13.56	YML086C	ALO1	6	16	1	0	1	0	0	0	0	1	0
Scer_13.67	Spar_13.63	YML080W	DUS1	2	8	0	0	0	0	0	0	0	1	0
Scer_13.73	Spar_13.69	YML074C	FPR3	0	0	3	13	0	0	0	0	0	1	0
Scer_14.106	Spar_14.95	YNL248C	RPA49	1	3	0	0	0	0	0	0	0	1	0
Scer_14.114	Spar_14.103	YNL240C	NAR1	0	11	4	6	0	0	0	0	0	1	0
Scer_14.116	Spar_14.105	YNL238W	KEX2	21	36	71	28	1	1	1	0	0	1	0
Scer_14.124	Spar_14.113	YNL229C	URE2	30	30	4	14	1	0	0	0	0	1	0
Scer_14.139	Spar_14.128	YNL213C	RRG9	2	1	0	4	0	0	0	0	0	1	0
Scer_14.145	Spar_14.134	YNL207W	RIO2	14	8	19	15	1	1	1	0	0	1	0
Scer_14.160	Spar_14.148	YNL191W	DUG3	5	0	0	0	0	0	0	0	0	1	0
Scer_14.161	Spar_14.149	YNL190W	NA	76	103	73	101	1	1	1	0	0	1	0
Scer_14.170	Spar_14.158	YNL181W	NA	0	0	0	8	0	0	0	0	0	1	0
Scer_14.175	Spar_14.163	YNL176C	TDA7	13	10	13	0	1	0	0	0	0	1	0
Scer_14.183	Spar_14.173	YNL165W	NA	2	0	2	0	0	0	0	0	0	1	0
Scer_14.184	Spar_14.174	YNL164C	IBD2	43	9	32	19	1	1	1	0	0	1	0
Scer_14.215	Spar_14.204	YNL134C	NA	0	0	1	0	0	0	0	0	0	1	0
Scer_14.228	Spar_14.216	YNL123W	NMA111	0	0	1	0	0	0	0	0	0	1	0
Scer_14.252	Spar_14.240	YNL097C	PHO23	0	20	0	0	0	0	0	0	0	1	0
Scer_14.269	Spar_14.258	YNL081C	SWS2	0	2	0	1	0	0	0	0	0	1	0
Scer_14.274	Spar_14.263	YNL076W	MKS1	13	1	1	4	0	0	0	0	0	1	0
Scer_14.276	Spar_14.265	YNL074C	MLF3	0	0	0	4	0	0	0	0	0	1	0
Scer_14.286	Spar_14.274	YNL066W	41459	0	10	5	0	0	0	0	0	0	1	0
Scer_14.295	Spar_14.283	YNL055C	POR1	12	0	0	0	0	0	0	0	0	1	0
Scer_14.402	Spar_14.389	YNR026C	SEC12	0	9	0	0	0	0	0	0	0	1	0
Scer_14.403	Spar_14.390	YNR027W	BUD17	0	0	2	0	0	0	0	0	0	1	0
Scer_14.410	Spar_14.397	YNR033W	ABZ1	1	0	0	0	0	0	0	0	0	1	0
Scer_14.46	Spar_14.36	YNL298W	CLA4	9	17	1	0	1	0	0	0	0	1	0
Scer_14.52	Spar_14.44	YNL291C	MID1	4	4	2	0	0	0	0	0	0	1	0
Scer_14.98	Spar_14.87	YNL256W	FOL1	2	6	4	5	0	0	0	0	0	1	0
Scer_15.151	Spar_15.141	YOL044W	PEX15	2	0	0	0	0	0	0	0	0	1	0
Scer_15.175	Spar_15.164	YOL020W	TAT2	5	6	9	0	1	0	0	0	0	1	0
Scer_15.197	Spar_15.189	YOL002C	IZH2	4	7	4	1	0	0	0	0	0	1	0
Scer_15.253	Spar_15.246	YOR047C	STD1	1	4	7	0	0	0	0	0	0	1	0
Scer_15.258	Spar_15.251	YOR052C	NA	5	8	12	9	1	1	1	0	0	1	0
Scer_15.268	Spar_15.261	YOR061W	CKA2	35	2	38	27	0	1	0	0	0	1	0
Scer_15.275	Spar_15.268	YOR069W	VPS5	0	0	1	1	0	0	0	0	0	1	0
Scer_15.301	Spar_15.297	YOR090C	PTC5	8	17	26	6	1	1	1	0	0	1	0
Scer_15.303	Spar_15.299	YOR092W	ECM3	1	17	0	0	0	0	0	0	0	1	0
Scer_15.306	Spar_15.302	YOR095C	RKI1	0	1	13	6	0	1	0	0	0	1	0
Scer_15.310	Spar_15.306	YOR099W	KTR1	2	0	13	10	0	1	0	0	0	1	0
Scer_15.319	Spar_15.315	YOR110W	TFC7	1	13	4	0	0	0	0	0	0	1	0
Scer_15.322	Spar_15.318	YOR113W	AZF1	7	0	1	15	0	0	0	0	0	1	0
Scer_15.33	Spar_15.22	YOL148C	SPT20	0	4	0	0	0	0	0	0	0	1	0
Scer_15.338	Spar_4.732	YOR130C	ORT1	4	7	3	0	0	0	0	0	0	1	0
Scer_15.349	Spar_15.331	YOR142W	LSC1	70	44	58	44	1	1	1	0	0	1	0
Scer_15.375	Spar_15.350	YOR157C	PUP1	45	12	0	3	1	0	0	0	0	1	0
Scer_15.382	Spar_15.356	YOR163W	DDP1	0	0	0	9	0	0	0	0	0	1	0
Scer_15.42	Spar_15.31	YOL139C	CDC33	0	0	3	17	0	0	0	0	0	1	0
Scer_15.467	Spar_15.439	YOR232W	MGE1	24	30	3	20	1	0	0	0	0	1	0
Scer_15.533	Spar_15.507	YOR298C-A	MBF1	0	22	12	19	0	1	0	0	0	1	0
Scer_15.543	Spar_15.516	YOR306C	MCH5	2	0	0	5	0	0	0	0	0	1	0
Scer_15.558	Spar_15.533	YOR319W	HSH49	4	0	0	0	0	0	0	0	0	1	0
Scer_15.577	Spar_15.552	YOR340C	RPA43	2	5	13	4	0	0	0	0	0	1	0
Scer_15.578	Spar_15.553	YOR341W	RPA190	3	0	22	40	0	1	0	0	0	1	0
Scer_15.69	Spar_15.59	YOL111C	MDY2	1	0	0	3	0	0	0	0	0	1	0
Scer_15.71	Spar_15.61	YOL109W	ZEO1	0	1	0	35	0	0	0	0	0	1	0
Scer_15.87	Spar_15.74	YOL102C	TPT1	0	0	5	1	0	0	0	0	0	1	0
Scer_15.97	Spar_15.84	YOL092W	YPQ1	2	0	0	2	0	0	0	0	0	1	0
Scer_16.151	Spar_16.170	YPL157W	TGS1	0	0	26	10	0	1	0	0	1	1	0
Scer_16.167	Spar_16.185	YPL141C	FRK1	9	4	8	15	0	1	0	0	0	1	0
Scer_16.181	Spar_16.199	YPL126W	NAN1	0	0	0	1	0	0	0	0	0	1	0
Scer_16.219	Spar_16.236	YPL092W	SSU1	10	0	2	0	0	0	0	0	0	1	0
Scer_16.222	Spar_16.239	YPL089C	RLM1	21	11	25	15	1	1	1	0	0	1	0
Scer_16.225	Spar_16.242	YPL086C	ELP3	0	12	0	0	0	0	0	0	0	1	0
Scer_16.229	Spar_16.246	YPL082C	MOT1	3	8	2	0	0	0	0	0	0	1	0
Scer_16.243	Spar_16.262	YPL067C	NA	2	0	4	5	0	0	0	0	0	1	0
Scer_16.245	Spar_16.264	YPL065W	VPS28	2	0	0	0	0	0	0	0	0	1	0
Scer_16.262	Spar_16.278	YPL057C	SUR1	28	42	23	38	1	1	1	0	0	1	0
Scer_16.264	Spar_16.280	YPL055C	LGE1	0	0	5	0	0	0	0	0	0	1	0
Scer_16.422	Spar_16.451	YPR097W	NA	2	6	9	12	0	1	0	0	0	1	0
Scer_16.517	Spar_16.531	YPR161C	SGV1	0	0	3	0	0	0	0	0	0	1	0
Scer_16.52	Spar_16.70	YPL253C	VIK1	1	0	0	0	0	0	0	0	0	1	0
Scer_16.534	Spar_16.552	YPR176C	BET2	1	9	0	0	0	0	0	0	0	1	0
Scer_16.58	Spar_16.77	YPL247C	NA	0	0	3	0	0	0	0	0	0	1	0
Scer_16.62	Spar_16.81	YPL243W	SRP68	2	0	10	0	0	0	0	0	0	1	0
Scer_16.66	Spar_16.85	YPL239W	YAR1	11	5	8	66	1	1	1	0	0	1	0
Scer_16.85	Spar_16.104	YPL219W	PCL8	0	0	0	2	0	0	0	0	0	1	0
Scer_16.98	Spar_16.117	YPL206C	PGC1	2	0	1	0	0	0	0	0	0	1	0
Scer_2.185	Spar_2.158	YBR017C	KAP104	2	0	0	0	0	0	0	0	0	1	0
Scer_2.207	Spar_2.181	YBR039W	ATP3	30	9	14	8	1	1	1	0	0	1	0
Scer_2.218	Spar_2.194	YBR046C	ZTA1	2	1	0	0	0	0	0	0	0	1	0
Scer_2.245	Spar_2.224	YBR069C	TAT1	4	0	0	0	0	0	0	0	0	1	0
Scer_2.27	Spar_2.19	YBL103C	RTG3	3	5	8	7	0	1	0	0	0	1	0
Scer_2.302	Spar_2.277	YBR119W	MUD1	1	8	0	0	0	0	0	0	0	1	0
Scer_2.308	Spar_2.283	YBR126C	TPS1	0	7	9	1	0	0	0	0	0	1	0
Scer_2.320	Spar_2.296	YBR137W	NA	0	5	0	0	0	0	0	0	0	1	0
Scer_2.345	Spar_2.322	YBR162C	TOS1	41	23	34	18	1	1	1	0	0	1	0
Scer_2.398	Spar_2.376	YBR208C	DUR1,2	2	0	0	13	0	0	0	0	0	1	0
Scer_2.411	Spar_2.391	YBR215W	HPC2	0	0	6	0	0	0	0	0	0	1	0
Scer_2.432	Spar_2.410	YBR234C	ARC40	0	11	0	0	0	0	0	0	0	1	0
Scer_2.436	Spar_2.414	YBR238C	NA	0	0	0	1	0	0	0	0	0	1	0
Scer_2.460	Spar_2.439	YBR261C	TAE1	0	1	0	0	0	0	0	0	0	1	0
Scer_2.461	Spar_2.440	YBR262C	AIM5	1	0	0	2	0	0	0	0	0	1	0
Scer_2.471	Spar_2.450	YBR273C	UBX7	0	0	1	1	0	0	0	0	0	1	0
Scer_2.48	Spar_2.31	YBL092W	RPL32	6	0	2	0	0	0	0	0	0	1	0
Scer_2.488	Spar_2.467	YBR291C	CTP1	18	0	12	0	0	0	0	0	0	1	0
Scer_2.86	Spar_2.69	YBL054W	TOD6	6	10	0	4	1	0	0	0	0	1	0
Scer_3.105	Spar_3.95	YCR009C	RVS161	2	3	0	4	0	0	0	0	0	1	0
Scer_3.107	Spar_3.97	YCR011C	ADP1	6	3	7	0	0	0	0	0	0	1	0
Scer_3.176	Spar_3.166	YCR065W	HCM1	1	0	0	5	0	0	0	0	0	1	0
Scer_4.115	Spar_4.124	YDL141W	BPL1	3	4	21	16	0	1	0	0	0	1	0
Scer_4.133	Spar_4.155	YDL124W	NA	0	9	2	0	0	0	0	0	0	1	0
Scer_4.154	Spar_4.177	YDL103C	QRI1	3	23	1	0	0	0	0	0	0	1	0
Scer_4.191	Spar_4.214	YDL066W	IDP1	0	1	0	0	0	0	0	0	0	1	0
Scer_4.204	Spar_4.228	YDL053C	PBP4	2	17	61	57	0	1	0	0	0	1	0
Scer_4.210	Spar_4.234	YDL046W	NPC2	3	20	3	0	0	0	0	0	0	1	0
Scer_4.225	Spar_4.251	YDL028C	MPS1	29	8	1	3	1	0	0	0	0	1	0
Scer_4.232	Spar_4.257	YDL022W	GPD1	2	7	1	5	0	0	0	0	0	1	0
Scer_4.256	Spar_4.278	YDL004W	ATP16	2	22	2	32	0	0	0	0	0	1	0
Scer_4.257	Spar_4.279	YDL003W	MCD1	4	12	1	2	0	0	0	0	0	1	0
Scer_4.258	Spar_4.280	YDL002C	NHP10	3	2	0	0	0	0	0	0	0	1	0
Scer_4.277	Spar_4.299	YDR017C	KCS1	2	0	14	4	0	0	0	0	0	1	0
Scer_4.291	Spar_4.317	YDR028C	REG1	16	28	8	18	1	1	1	0	0	1	0
Scer_4.329	Spar_4.348	YDR047W	HEM12	2	2	4	20	0	0	0	0	0	1	0
Scer_4.337	Spar_4.355	YDR056C	NA	4	0	4	20	0	0	0	0	0	1	0
Scer_4.358	Spar_4.377	YDR075W	PPH3	2	0	3	0	0	0	0	0	0	1	0
Scer_4.368	Spar_4.388	YDR084C	TVP23	20	7	7	9	1	1	1	0	0	1	0
Scer_4.374	Spar_4.394	YDR089W	NA	0	9	0	0	0	0	0	0	0	1	0
Scer_4.416	Spar_4.430	YDR121W	DPB4	0	11	16	7	0	1	0	0	0	1	0
Scer_4.442	Spar_4.455	YDR147W	EKI1	0	0	1	0	0	0	0	0	0	1	0
Scer_4.448	Spar_4.461	YDR153C	ENT5	7	7	6	0	1	0	0	0	0	1	0
Scer_4.455	Spar_4.468	YDR161W	NA	2	0	0	1	0	0	0	0	0	1	0
Scer_4.456	Spar_4.469	YDR162C	NBP2	4	0	0	0	0	0	0	0	0	1	0
Scer_4.478	Spar_4.487	YDR175C	RSM24	4	0	5	15	0	1	0	0	0	1	0
Scer_4.500	Spar_4.509	YDR195W	REF2	2	0	2	0	0	0	0	0	0	1	0
Scer_4.510	Spar_4.519	YDR207C	UME6	0	0	14	10	0	1	0	0	1	1	0
Scer_4.552	Spar_4.548	YDR234W	LYS4	7	9	13	0	1	0	0	0	0	1	0
Scer_4.619	Spar_4.659	YDR283C	GCN2	19	14	17	6	1	1	1	0	0	1	0
Scer_4.629	Spar_4.669	YDR293C	SSD1	76	30	14	1	1	0	0	0	0	1	0
Scer_4.631	Spar_4.671	YDR295C	HDA2	1	0	0	0	0	0	0	0	0	1	0
Scer_4.687	Spar_4.719	YDR339C	FCF1	1	0	0	0	0	0	0	0	0	1	0
Scer_4.70	Spar_4.75	YDL190C	UFD2	11	12	15	10	1	1	1	0	0	1	0
Scer_4.730	Spar_4.593	YDR367W	KEI1	0	12	0	0	0	0	0	0	0	1	0
Scer_4.746	Spar_4.577	YDR381W	YRA1	104	62	0	0	1	0	0	1	0	1	0
Scer_4.762	Spar_4.751	YDR395W	SXM1	301	181	86	47	1	1	1	0	0	1	0
Scer_4.766	Spar_4.755	YDR400W	URH1	0	2	0	7	0	0	0	0	0	1	0
Scer_4.820	Spar_4.821	YDR452W	PPN1	6	0	0	10	0	0	0	0	0	1	0
Scer_4.824	Spar_4.826	YDR457W	TOM1	4	0	2	0	0	0	0	0	0	1	0
Scer_4.843	Spar_4.845	YDR477W	SNF1	10	1	51	25	0	1	0	0	0	1	0
Scer_4.848	Spar_4.850	YDR482C	CWC21	0	0	3	0	0	0	0	0	0	1	0
Scer_4.881	Spar_4.886	YDR514C	NA	0	0	0	2	0	0	0	0	0	1	0
Scer_5.100	Spar_5.122	YER001W	MNN1	7	2	4	0	0	0	0	0	0	1	0
Scer_5.134	Spar_5.164	YER028C	MIG3	3	0	15	0	0	0	0	0	0	1	0
Scer_5.161	Spar_5.191	YER050C	RSM18	6	8	0	0	1	0	0	1	0	1	0
Scer_5.163	Spar_5.193	YER052C	HOM3	7	3	13	3	0	0	0	0	0	1	0
Scer_5.167	Spar_5.197	YER055C	HIS1	6	5	0	8	1	0	0	0	0	1	0
Scer_5.176	Spar_5.207	YER062C	HOR2	1	5	1	4	0	0	0	0	0	1	0
Scer_5.236	Spar_5.280	YER107C	GLE2	14	35	1	0	1	0	0	0	0	1	0
Scer_5.251	Spar_5.293	YER120W	SCS2	0	1	0	23	0	0	0	0	0	1	0
Scer_5.256	Spar_5.298	YER125W	RSP5	56	39	62	49	1	1	1	0	0	1	0
Scer_5.294	Spar_5.332	YER141W	COX15	0	5	0	18	0	0	0	0	0	1	0
Scer_5.337	Spar_5.368	YER171W	RAD3	0	5	6	0	0	0	0	0	0	1	0
Scer_6.131	Spar_6.129	YFR021W	ATG18	2	21	0	0	0	0	0	0	0	1	0
Scer_6.152	Spar_6.147	YFR033C	QCR6	61	21	4	18	1	0	0	0	0	1	0
Scer_6.158	Spar_6.152	YFR037C	RSC8	0	0	0	10	0	0	0	0	0	1	0
Scer_6.161	Spar_6.155	YFR040W	SAP155	0	3	0	0	0	0	0	0	0	1	0
Scer_6.169	Spar_6.163	YFR048W	RMD8	2	0	1	0	0	0	0	0	0	1	0
Scer_7.113	Spar_7.109	YGL169W	SUA5	1	1	12	8	0	1	0	0	0	1	0
Scer_7.114	Spar_7.111	YGL167C	PMR1	57	52	5	16	1	1	1	0	0	1	0
Scer_7.15	Spar_7.13	YGL255W	ZRT1	0	8	0	0	0	0	0	0	0	1	0
Scer_7.164	Spar_7.169	YGL116W	CDC20	1	0	12	7	0	1	0	0	0	1	0
Scer_7.205	Spar_7.212	YGL078C	DBP3	1	2	1	0	0	0	0	0	0	1	0
Scer_7.206	Spar_7.213	YGL077C	HNM1	1	1	5	3	0	0	0	0	0	1	0
Scer_7.239	Spar_7.242	YGL049C	TIF4632	6	11	11	14	1	1	1	0	0	1	0
Scer_7.245	Spar_7.250	YGL044C	RNA15	13	7	42	17	1	1	1	0	0	1	0
Scer_7.264	Spar_7.272	YGL028C	SCW11	35	18	15	0	1	0	0	0	0	1	0
Scer_7.279	Spar_7.288	YGL012W	ERG4	0	0	0	5	0	0	0	0	0	1	0
Scer_7.28	Spar_7.26	YGL242C	NA	0	5	0	0	0	0	0	0	0	1	0
Scer_7.286	Spar_7.294	YGL006W	PMC1	35	37	10	34	1	1	1	0	0	1	0
Scer_7.289	Spar_7.297	YGL003C	CDH1	1	1	0	0	0	0	0	0	0	1	0
Scer_7.364	Spar_7.353	YGR041W	BUD9	0	0	1	0	0	0	0	0	0	1	0
Scer_7.372	Spar_7.361	YGR049W	SCM4	1	0	1	0	0	0	0	0	0	1	0
Scer_7.476	Spar_7.468	YGR141W	VPS62	0	0	2	0	0	0	0	0	0	1	0
Scer_7.477	Spar_7.469	YGR142W	BTN2	2	0	0	0	0	0	0	0	0	1	0
Scer_7.500	Spar_7.493	YGR155W	CYS4	0	0	5	2	0	0	0	0	0	1	0
Scer_7.529	Spar_7.513	YGR166W	TRS65	31	0	2	0	0	0	0	0	0	1	0
Scer_7.537	Spar_7.521	YGR173W	RBG2	0	1	3	0	0	0	0	0	0	1	0
Scer_7.561	Spar_7.550	YGR193C	PDX1	0	22	15	6	0	1	0	0	0	1	0
Scer_7.563	Spar_7.552	YGR195W	SKI6	8	4	5	0	0	0	0	0	0	1	0
Scer_7.570	Spar_7.559	YGR202C	PCT1	0	0	2	0	0	0	0	0	0	1	0
Scer_7.592	Spar_7.579	YGR218W	CRM1	468	318	18	12	1	1	1	0	0	1	0
Scer_7.62	Spar_7.59	YGL207W	SPT16	12	14	4	4	1	0	0	0	0	1	0
Scer_7.624	Spar_7.613	YGR252W	GCN5	1	0	0	0	0	0	0	0	0	1	0
Scer_7.63	Spar_7.60	YGL206C	CHC1	2	0	7	0	0	0	0	0	0	1	0
Scer_7.76	Spar_7.70	YGL202W	ARO8	147	124	73	125	1	1	1	0	0	1	0
Scer_7.84	Spar_7.82	YGL195W	GCN1	1	0	0	0	0	0	0	0	0	1	0
Scer_7.89	Spar_7.87	YGL191W	COX13	0	0	10	0	0	0	0	0	0	1	0
Scer_7.90	Spar_7.88	YGL190C	CDC55	28	26	53	43	1	1	1	0	0	1	0
Scer_8.130	Spar_8.113	YHR039C	MSC7	0	0	0	6	0	0	0	0	0	1	0
Scer_8.158	Spar_8.138	YHR061C	GIC1	1	1	1	2	0	0	0	0	0	1	0
Scer_8.202	Spar_8.183	YHR099W	TRA1	0	5	3	0	0	0	0	0	0	1	0
Scer_8.205	Spar_8.186	YHR102W	KIC1	3	13	1	0	0	0	0	0	0	1	0
Scer_8.207	Spar_8.188	YHR104W	GRE3	0	0	8	5	0	1	0	0	1	1	0
Scer_8.222	Spar_8.203	YHR119W	SET1	1	8	0	0	0	0	0	0	0	1	0
Scer_8.223	Spar_8.204	YHR120W	MSH1	3	0	0	2	0	0	0	0	0	1	0
Scer_8.224	Spar_8.205	YHR121W	LSM12	2	9	1	1	0	0	0	0	0	1	0
Scer_8.23	Spar_8.15	YHL038C	CBP2	0	0	4	6	0	0	0	0	0	1	0
Scer_8.242	Spar_8.227	YHR135C	YCK1	17	22	5	3	1	0	0	0	0	1	0
Scer_8.261	Spar_8.246	YHR149C	SKG6	0	0	0	1	0	0	0	0	0	1	0
Scer_8.281	Spar_8.266	YHR169W	DBP8	0	0	1	1	0	0	0	0	0	1	0
Scer_8.319	Spar_8.309	YHR200W	RPN10	0	7	0	0	0	0	0	0	0	1	0
Scer_9.157	Spar_9.135	YIL046W	MET30	0	0	0	4	0	0	0	0	0	1	0
Scer_9.170	Spar_9.148	YIL033C	BCY1	8	0	1	10	0	0	0	0	0	1	0
Scer_9.200	Spar_9.181	YIL014W	MNT3	1	2	8	1	0	0	0	0	0	1	0
Scer_9.203	Spar_9.184	YIL011W	TIR3	5	0	0	0	0	0	0	0	0	1	0
Scer_9.216	Spar_9.199	YIL001W	NA	2	8	0	0	0	0	0	0	0	1	0
Scer_9.38	Spar_9.25	YIL147C	SLN1	6	9	19	17	1	1	1	0	0	1	0
Scer_9.63	Spar_9.50	YIL123W	SIM1	2	1	1	13	0	0	0	0	0	1	0
Scer_9.79	Spar_9.66	YIL108W	NA	0	0	15	3	0	0	0	0	0	1	0
Scer_9.82	Spar_9.69	YIL105C	SLM1	5	5	0		1	0	0	0	0	1	0
Scer_9.98	Spar_9.87	YIL093C	RSM25	4	0	0	0	0	0	0	0	0	1	0
Scer_1.28	Spar_1.9	YAL060W	BDH1	0	20	1	4	0	0	0	0	0	0	1
Scer_1.45	Spar_1.27	YAL040C	CLN3	29	23	34	44	1	1	1	0	0	0	1
Scer_1.55	Spar_1.37	YAL032C	PRP45	0	0	0	3	0	0	0	0	0	0	1
Scer_1.82	Spar_1.65	YAL007C	ERP2	0	5	0	1	0	0	0	0	0	0	1
Scer_1.91	Spar_1.80	YAR007C	RFA1	0	1	0	0	0	0	0	0	0	0	1
Scer_1.92	Spar_1.81	YAR008W	SEN34	14	22	1	0	1	0	0	0	0	0	1
Scer_10.107	Spar_10.107	YJL128C	PBS2	2	14	5	0	0	0	0	0	0	0	1
Scer_10.111	Spar_10.112	YJL127C	SPT10	25	3	0	0	0	0	0	0	0	0	1
Scer_10.122	Spar_10.124	YJL115W	ASF1	0	6	1	3	0	0	0	0	0	0	1
Scer_10.140	Spar_10.136	YJL109C	UTP10	0	0	0	1	0	0	0	0	0	0	1
Scer_10.189	Spar_10.184	YJL060W	BNA3	0	0	1	0	0	0	0	0	0	0	1
Scer_10.202	Spar_10.197	YJL048C	UBX6	0	0	0	17	0	0	0	0	0	0	1
Scer_10.253	Spar_10.260	YJL008C	CCT8	0	0	0	1	0	0	0	0	0	0	1
Scer_10.351	Spar_10.337	YJR059W	PTK2	0	1	0	0	0	0	0	0	0	0	1
Scer_10.360	Spar_10.346	YJR068W	RFC2	2	0	0	0	0	0	0	0	0	0	1
Scer_10.366	Spar_10.353	YJR075W	HOC1	0	0	0	19	0	0	0	0	0	0	1
Scer_10.375	Spar_10.362	YJR085C	NA	0	2	0	0	0	0	0	0	0	0	1
Scer_10.377	Spar_10.364	YJR088C	EMC2	0	1	0	0	0	0	0	0	0	0	1
Scer_10.389	Spar_10.376	YJR099W	YUH1	6	0	7	10	0	1	0	0	0	0	1
Scer_10.431	Spar_10.421	YJR136C	TTI2	0	0	3	0	0	0	0	0	0	0	1
Scer_10.54	Spar_10.52	YJL179W	PFD1	2	0	4	7	0	0	0	0	0	0	1
Scer_10.57	Spar_10.55	YJL176C	SWI3	0	23	5	0	0	0	0	0	0	0	1
Scer_10.78	Spar_10.79	YJL156C	SSY5	2	0	0	0	0	0	0	0	0	0	1
Scer_11.122	Spar_11.145	YKL113C	RAD27	2	0	5	0	0	0	0	0	0	0	1
Scer_11.139	Spar_11.161	YKL096W-A	CWP2	13	13	33	83	1	1	1	0	0	0	1
Scer_11.153	Spar_11.176	YKL082C	RRP14	0	5	0	7	0	0	0	0	0	0	1
Scer_11.186	Spar_11.206	YKL063C	NA	10	24	3	0	1	0	0	0	0	0	1
Scer_11.190	Spar_11.210	YKL059C	MPE1	0	0	2	5	0	0	0	0	0	0	1
Scer_11.193	Spar_11.213	YKL056C	TMA19	23	27	9	18	1	1	1	0	0	0	1
Scer_11.195	Spar_11.215	YKL054C	DEF1	18	15	0	5	1	0	0	0	0	0	1
Scer_11.198	Spar_11.218	YKL051W	SFK1	4	0	3	3	0	0	0	0	0	0	1
Scer_11.203	Spar_11.223	YKL046C	DCW1	9	20	9	38	1	1	1	0	0	0	1
Scer_11.238	Spar_11.266	YKL013C	ARC19	0	0	4	5	0	0	0	0	0	0	1
Scer_11.241	Spar_11.269	YKL010C	UFD4	0	3	4	0	0	0	0	0	0	0	1
Scer_11.242	Spar_11.270	YKL009W	MRT4	0	0	0	11	0	0	0	0	0	0	1
Scer_11.247	Spar_11.275	YKL005C	BYE1	1	0	1	10	0	0	0	0	0	0	1
Scer_11.297	Spar_11.325	YKR038C	KAE1	2	1	0	0	0	0	0	0	0	0	1
Scer_11.321	Spar_11.346	YKR056W	TRM2	0	1	0	0	0	0	0	0	0	0	1
Scer_11.346	Spar_11.371	YKR080W	MTD1	4	21	3	0	0	0	0	0	0	0	1
Scer_11.36	Spar_11.53	YKL190W	CNB1	0	3	0	0	0	0	0	0	0	0	1
Scer_11.58	Spar_11.78	YKL170W	MRPL38	3	1	3	5	0	0	0	0	0	0	1
Scer_11.79	Spar_11.99	YKL154W	SRP102	0	18	0	0	0	0	0	0	0	0	1
Scer_11.85	Spar_11.105	YKL150W	MCR1	3	0	11	27	0	1	0	0	0	0	1
Scer_11.89	Spar_11.111	YKL145W	RPT1	12	1	1	0	0	0	0	0	0	0	1
Scer_11.91	Spar_11.113	YKL143W	LTV1	0	0	5	1	0	0	0	0	0	0	1
Scer_11.94	Spar_11.116	YKL140W	TGL1	0	0	5	19	0	1	0	0	1	0	1
Scer_11.95	Spar_11.117	YKL139W	CTK1	2	1	2	0	0	0	0	0	0	0	1
Scer_12.101	Spar_12.85	YLR011W	LOT6	1	0	5	1	0	0	0	0	0	0	1
Scer_12.113	Spar_12.97	YLR023C	IZH3	0	6	0	2	0	0	0	0	0	0	1
Scer_12.124	Spar_12.107	YLR034C	SMF3	44	62	129	134	1	1	1	0	0	0	1
Scer_12.143	Spar_12.122	YLR046C	NA	14	12	0	11	1	0	0	0	0	0	1
Scer_12.153	Spar_12.132	YLR056W	ERG3	2	17	5	0	0	0	0	0	0	0	1
Scer_12.201	Spar_12.180	YLR106C	MDN1	1	1	9	0	0	0	0	0	0	0	1
Scer_12.333	Spar_12.301	YLR193C	UPS1	0	0	0	1	0	0	0	0	0	0	1
Scer_12.353	Spar_12.322	YLR214W	FRE1	7	7	0	5	1	0	0	0	0	0	1
Scer_12.359	Spar_12.329	YLR221C	RSA3	0	3	0	0	0	0	0	0	0	0	1
Scer_12.363	Spar_12.333	YLR224W	NA	4	5	15	27	0	1	0	0	0	0	1
Scer_12.364	Spar_12.334	YLR225C	NA	0	0	5	0	0	0	0	0	0	0	1
Scer_12.380	Spar_12.340	YLR228C	ECM22	3	0	2	6	0	0	0	0	0	0	1
Scer_12.399	Spar_12.362	YLR248W	RCK2	4	0	0	0	0	0	0	0	0	0	1
Scer_12.404	Spar_12.367	YLR253W	NA	8	10	27	34	1	1	1	0	0	0	1
Scer_12.441	Spar_12.397	YLR276C	DBP9	24	21	11	11	1	1	1	0	0	0	1
Scer_12.481	Spar_12.436	YLR310C	CDC25	6	20	2	0	1	0	0	0	0	0	1
Scer_12.492	Spar_12.446	YLR319C	BUD6	10	0	20	0	0	0	0	0	0	0	1
Scer_12.557	Spar_12.516	YLR378C	SEC61	180	95	51	98	1	1	1	0	0	0	1
Scer_12.558	Spar_12.517	YLR380W	CSR1	2	12	1	6	0	0	0	0	0	0	1
Scer_12.58	Spar_12.41	YLL027W	ISA1	1	0	12	0	0	0	0	0	0	0	1
Scer_13.131	Spar_13.115	YML038C	YMD8	8	16	1	0	1	0	0	0	0	0	1
Scer_13.137	Spar_13.121	YML032C	RAD52	4	0	0	0	0	0	0	0	0	0	1
Scer_13.144	Spar_13.128	YML025C	YML6	2	0	0	0	0	0	0	0	0	0	1
Scer_13.175	Spar_13.161	YMR004W	MVP1	1	0	0	0	0	0	0	0	0	0	1
Scer_13.203	Spar_13.192	YMR029C	FAR8	1	5	0	0	0	0	0	0	0	0	1
Scer_13.281	Spar_13.256	YMR083W	ADH3	0	1	1	0	0	0	0	0	0	0	1
Scer_13.347	Spar_13.315	YMR131C	RRB1	1	2	0	0	0	0	0	0	0	0	1
Scer_13.356	Spar_13.324	YMR139W	RIM11	32	44	25	2	1	0	0	0	0	0	1
Scer_13.362	Spar_13.329	YMR144W	NA	8	0	16	0	0	0	0	0	0	0	1
Scer_13.370	Spar_13.337	YMR152W	YIM1	3	0	0	0	0	0	0	0	0	0	1
Scer_13.392	Spar_13.363	YMR171C	EAR1	15	5	16	11	1	1	1	0	0	0	1
Scer_13.415	Spar_13.387	YMR192W	GYL1	10	4	0	0	0	0	0	0	0	0	1
Scer_13.429	Spar_13.400	YMR203W	TOM40	7	0	4	0	0	0	0	0	0	0	1
Scer_13.467	Spar_13.427	YMR239C	RNT1	0	1	6	0	0	0	0	0	0	0	1
Scer_13.495	Spar_13.454	YMR261C	TPS3	4	14	13	5	0	1	0	0	0	0	1
Scer_13.498	Spar_13.457	YMR264W	CUE1	0	0	1	0	0	0	0	0	0	0	1
Scer_13.511	Spar_13.467	YMR273C	ZDS1	3	0	3	0	0	0	0	0	0	0	1
Scer_13.515	Spar_13.471	YMR277W	FCP1	1	0	1	0	0	0	0	0	0	0	1
Scer_13.534	Spar_13.489	YMR291W	TDA1	4	9	0	13	0	0	0	0	0	0	1
Scer_13.540	Spar_13.495	YMR297W	PRC1	3	0	0	5	0	0	0	0	0	0	1
Scer_13.551	Spar_13.506	YMR307W	GAS1	7	0	0	24	0	0	0	0	0	0	1
Scer_13.563	Spar_13.520	YMR318C	ADH6	3	5	4	9	0	0	0	0	0	0	1
Scer_13.564	Spar_13.521	YMR319C	FET4	75	34	1	11	1	0	0	0	0	0	1
Scer_13.86	Spar_13.85	YML063W	RPS1B	0	3	0	33	0	0	0	0	0	0	1
Scer_13.90	Spar_13.89	YML059C	NTE1	1	1	5	0	0	0	0	0	0	0	1
Scer_14.113	Spar_14.102	YNL241C	ZWF1	7	18	39	4	1	0	0	0	0	0	1
Scer_14.120	Spar_14.109	YNL233W	BNI4	0	8	0	0	0	0	0	0	0	0	1
Scer_14.122	Spar_14.111	YNL231C	PDR16	25	65	9	12	1	1	1	0	0	0	1
Scer_14.131	Spar_14.120	YNL221C	POP1	0	0	2	0	0	0	0	0	0	0	1
Scer_14.150	Spar_14.138	YNL201C	PSY2	0	1	1	0	0	0	0	0	0	0	1
Scer_14.154	Spar_14.142	YNL197C	WHI3	16	16	19	41	1	1	1	0	0	0	1
Scer_14.162	Spar_14.150	YNL189W	SRP1	146	100	256	189	1	1	1	0	0	0	1
Scer_14.166	Spar_14.154	YNL185C	MRPL19	1	5	1	0	0	0	0	0	0	0	1
Scer_14.179	Spar_14.169	YNL169C	PSD1	0	0	2	0	0	0	0	0	0	0	1
Scer_14.198	Spar_14.188	YNL151C	RPC31	3	6	0	18	0	0	0	0	0	0	1
Scer_14.208	Spar_14.197	YNL141W	AAH1	0	1	0	0	0	0	0	0	0	0	1
Scer_14.218	Spar_14.207	YNL132W	KRE33	0	6	5	3	0	0	0	0	0	0	1
Scer_14.219	Spar_14.208	YNL131W	TOM22	1	29	0	0	0	0	0	0	0	0	1
Scer_14.234	Spar_14.222	YNL116W	DMA2	3	0	0	0	0	0	0	0	0	0	1
Scer_14.240	Spar_14.228	YNL110C	NOP15	3	0	0	3	0	0	0	0	0	0	1
Scer_14.249	Spar_14.237	YNL099C	OCA1	0	0	1	0	0	0	0	0	0	0	1
Scer_14.264	Spar_14.254	YNL085W	MKT1	69	77	67	43	1	1	1	0	0	0	1
Scer_14.279	Spar_14.268	YNL071W	LAT1	0	16	0	1	0	0	0	0	0	0	1
Scer_14.282	Spar_14.271	YNL068C	FKH2	9	19	44	23	1	1	1	0	0	0	1
Scer_14.288	Spar_14.276	YNL064C	YDJ1	84	75	44	17	1	1	1	0	0	0	1
Scer_14.306	Spar_14.287	YNL052W	COX5A	0	1	0	0	0	0	0	0	0	0	1
Scer_14.368	Spar_14.358	YNL005C	MRP7	1	1	0	0	0	0	0	0	0	0	1
Scer_14.386	Spar_14.373	YNR009W	NRM1	4	1	0	3	0	0	0	0	0	0	1
Scer_14.406	Spar_14.393	YNR030W	ALG12	2	0	0	0	0	0	0	0	0	0	1
Scer_14.427	Spar_14.414	YNR050C	LYS9	1	0	2	0	0	0	0	0	0	0	1
Scer_14.49	Spar_14.41	YNL294C	RIM21	0	11	16	24	0	1	0	0	0	0	1
Scer_14.71	Spar_14.62	YNL283C	WSC2	14	24	0	7	1	0	0	0	0	0	1
Scer_14.93	Spar_14.82	YNL261W	ORC5	22	82	0	0	1	0	0	1	0	0	1
Scer_15.128	Spar_15.115	YOL062C	APM4	4	7	4	24	0	0	0	0	0	0	1
Scer_15.154	Spar_15.144	YOL041C	NOP12	0	0	1	0	0	0	0	0	0	0	1
Scer_15.183	Spar_15.172	YOL014W	NA	51	101	16	28	1	1	1	0	0	0	1
Scer_15.200	Spar_15.194	YOR002W	ALG6	4	0	0	0	0	0	0	0	0	0	1
Scer_15.205	Spar_15.199	YOR007C	SGT2	0	1	0	1	0	0	0	0	0	0	1
Scer_15.218	Spar_15.209	YOR014W	RTS1	23	32	9	14	1	1	1	0	0	0	1
Scer_15.228	Spar_15.219	YOR023C	AHC1	2	7	12	13	0	1	0	0	0	0	1
Scer_15.238	Spar_15.229	YOR033C	EXO1	2	0	8	0	0	0	0	0	0	0	1
Scer_15.245	Spar_15.238	YOR039W	CKB2	16	17	16	14	1	1	1	0	0	0	1
Scer_15.255	Spar_15.248	YOR049C	RSB1	107	96	5	1	1	0	0	0	0	0	1
Scer_15.262	Spar_15.255	YOR058C	ASE1	0	1	3	0	0	0	0	0	0	0	1
Scer_15.272	Spar_15.265	YOR065W	CYT1	40	75	152	126	1	1	1	0	0	0	1
Scer_15.289	Spar_15.285	YOR078W	BUD21	3	9	2	0	0	0	0	0	0	0	1
Scer_15.315	Spar_15.311	YOR106W	VAM3	1	0	0	0	0	0	0	0	0	0	1
Scer_15.392	Spar_15.366	YOR174W	MED4	0	0	1	0	0	0	0	0	0	0	1
Scer_15.393	Spar_15.367	YOR175C	ALE1	1	0	2	0	0	0	0	0	0	0	1
Scer_15.431	Spar_15.401	YOR194C	TOA1	0	0	1	0	0	0	0	0	0	0	1
Scer_15.442	Spar_15.412	YOR206W	NOC2	0	0	1	0	0	0	0	0	0	0	1
Scer_15.452	Spar_15.422	YOR216C	RUD3	0	8	4	0	0	0	0	0	0	0	1
Scer_15.453	Spar_15.423	YOR217W	RFC1	3	0	11	30	0	1	0	0	0	0	1
Scer_15.463	Spar_15.435	YOR228C	NA	2	0	2	0	0	0	0	0	0	0	1
Scer_15.465	Spar_15.437	YOR230W	WTM1	0	0	2	0	0	0	0	0	0	0	1
Scer_15.466	Spar_15.438	YOR231W	MKK1	2	1	3	22	0	0	0	0	0	0	1
Scer_15.494	Spar_15.465	YOR260W	GCD1	1	6	0	3	0	0	0	0	0	0	1
Scer_15.506	Spar_15.479	YOR273C	TPO4	6	4	0	0	0	0	0	0	0	0	1
Scer_15.515	Spar_15.488	YOR283W	NA	0	0	1	0	0	0	0	0	0	0	1
Scer_15.54	Spar_15.44	YOL126C	MDH2	2	0	0	0	0	0	0	0	0	0	1
Scer_15.546	Spar_15.521	YOR310C	NOP58	5	0	0	0	0	0	0	0	0	0	1
Scer_15.554	Spar_15.529	YOR316C	COT1	0	8	1	0	0	0	0	0	0	0	1
Scer_15.565	Spar_15.540	YOR327C	SNC2	1	1	0	2	0	0	0	0	0	0	1
Scer_15.579	Spar_15.554	YOR342C	NA	13	29	37	24	1	1	1	0	0	0	1
Scer_15.607	Spar_15.577	YOR358W	HAP5	0	0	1	0	0	0	0	0	0	0	1
Scer_16.102	Spar_16.121	YPL202C	AFT2	0	0	1	0	0	0	0	0	0	0	1
Scer_16.130	Spar_16.149	YPL178W	CBC2	1	0	5	1	0	0	0	0	0	0	1
Scer_16.145	Spar_16.164	YPL163C	SVS1	0	0	0	10	0	0	0	0	0	0	1
Scer_16.149	Spar_16.168	YPL159C	PET20	2	21	4	3	0	0	0	0	0	0	1
Scer_16.163	Spar_16.181	YPL146C	NOP53	4	1	0	0	0	0	0	0	0	0	1
Scer_16.174	Spar_16.192	YPL133C	RDS2	0	1	0	0	0	0	0	0	0	0	1
Scer_16.195	Spar_16.212	YPL112C	PEX25	0	13	0	1	0	0	0	0	0	0	1
Scer_16.223	Spar_16.240	YPL088W	NA	0	0	5	0	0	0	0	0	0	0	1
Scer_16.244	Spar_16.263	YPL066W	RGL1	2	0	3	3	0	0	0	0	0	0	1
Scer_16.270	Spar_16.286	YPL049C	DIG1	1	0	0	0	0	0	0	0	0	0	1
Scer_16.274	Spar_16.290	YPL045W	VPS16	18	13	0	0	1	0	0	1	0	0	1
Scer_16.297	Spar_16.315	YPL022W	RAD1	0	1	1	1	0	0	0	0	0	0	1
Scer_16.345	Spar_16.365	YPR018W	RLF2	1	6	1	0	0	0	0	0	0	0	1
Scer_16.346	Spar_16.366	YPR019W	MCM4	0	0	3	0	0	0	0	0	0	0	1
Scer_16.385	Spar_16.405	YPR058W	YMC1	0	0	1	12	0	0	0	0	0	0	1
Scer_16.406	Spar_16.435	YPR079W	MRL1	0	3	4	0	0	0	0	0	0	0	1
Scer_16.438	Spar_16.467	YPR113W	PIS1	0	0	2	0	0	0	0	0	0	0	1
Scer_16.454	Spar_16.490	YPR125W	YLH47	7	0	1	4	0	0	0	0	0	0	1
Scer_16.519	Spar_16.533	YPR163C	TIF3	4	13	0	8	0	0	0	0	0	0	1
Scer_16.521	Spar_16.536	YPR165W	RHO1	27	29	225	156	1	1	1	0	0	0	1
Scer_16.531	Spar_16.549	YPR173C	VPS4	0	0	9	1	0	0	0	0	0	0	1
Scer_16.538	Spar_16.556	YPR181C	SEC23	2	12	1	7	0	0	0	0	0	0	1
Scer_16.542	Spar_16.560	YPR185W	ATG13	0	1	1	1	0	0	0	0	0	0	1
Scer_16.77	Spar_16.96	YPL227C	ALG5	1	0	6	1	0	0	0	0	0	0	1
Scer_2.135	Spar_2.126	YBL009W	ALK2	1	0	0	0	0	0	0	0	0	0	1
Scer_2.183	Spar_2.156	YBR015C	MNN2	3	16	6	0	0	0	0	0	0	0	1
Scer_2.193	Spar_2.166	YBR025C	OLA1	2	25	0	4	0	0	0	0	0	0	1
Scer_2.258	Spar_2.234	YBR079C	RPG1	0	6	0	1	0	0	0	0	0	0	1
Scer_2.272	Spar_2.248	YBR089C-A	NHP6B	0	1	6	7	0	1	0	0	0	0	1
Scer_2.279	Spar_2.255	YBR096W	NA	0	0	0	1	0	0	0	0	0	0	1
Scer_2.342	Spar_2.319	YBR159W	IFA38	1	4	0	0	0	0	0	0	0	0	1
Scer_2.349	Spar_2.325	YBR164C	ARL1	12	0	20	3	0	0	0	0	0	0	1
Scer_2.370	Spar_2.350	YBR185C	MBA1	0	0	0	6	0	0	0	0	0	0	1
Scer_2.383	Spar_2.363	YBR196C	PGI1	13	18	2	11	1	0	0	0	0	0	1
Scer_2.388	Spar_2.367	YBR199W	KTR4	2	6	16	25	0	1	0	0	0	0	1
Scer_2.417	Spar_2.396	YBR221C	PDB1	463	362	179	77	1	1	1	0	0	0	1
Scer_2.442	Spar_2.420	YBR244W	GPX2	0	12	4	10	0	0	0	0	0	0	1
Scer_2.446	Spar_2.425	YBR248C	HIS7	0	0	1	0	0	0	0	0	0	0	1
Scer_2.451	Spar_2.430	YBR253W	SRB6	3	1	6	1	0	0	0	0	0	0	1
Scer_2.456	Spar_2.435	YBR257W	POP4	0	1	0	0	0	0	0	0	0	0	1
Scer_2.47	Spar_2.30	YBL093C	ROX3	16	18	0	0	1	0	0	1	0	0	1
Scer_2.473	Spar_2.452	YBR275C	RIF1	1	0	0	0	0	0	0	0	0	0	1
Scer_2.88	Spar_2.71	YBL051C	PIN4	2	11	0	0	0	0	0	0	0	0	1
Scer_3.14	Spar_3.20	YCL064C	CHA1	0	0	0	5	0	0	0	0	0	0	1
Scer_3.146	Spar_3.136	YCR030C	SYP1	6	0	0	0	0	0	0	0	0	0	1
Scer_3.152	Spar_3.142	YCR036W	RBK1	3	3	0	0	0	0	0	0	0	0	1
Scer_3.197	Spar_3.190	YCR088W	ABP1	0	12	0	0	0	0	0	0	0	0	1
Scer_3.87	Spar_3.74	YCL004W	PGS1	3	0	0	2	0	0	0	0	0	0	1
Scer_4.111	Spar_4.120	YDL145C	COP1	66	59	47	33	1	1	1	0	0	0	1
Scer_4.113	Spar_4.122	YDL143W	CCT4	2	0	0	0	0	0	0	0	0	0	1
Scer_4.123	Spar_4.145	YDL133W	SRF1	9	11	2	0	1	0	0	0	0	0	1
Scer_4.174	Spar_4.196	YDL084W	SUB2	70	61	74	45	1	1	1	0	0	0	1
Scer_4.182	Spar_4.205	YDL076C	RXT3	12	0	0	2	0	0	0	0	0	0	1
Scer_4.186	Spar_4.209	YDL072C	YET3	0	0	0	1	0	0	0	0	0	0	1
Scer_4.200	Spar_4.223	YDL056W	MBP1	1	1	0	0	0	0	0	0	0	0	1
Scer_4.234	Spar_4.259	YDL020C	RPN4	8	6	21	17	1	1	1	0	0	0	1
Scer_4.30	Spar_4.36	YDL230W	PTP1	0	1	0	0	0	0	0	0	0	0	1
Scer_4.327	Spar_4.346	YDR045C	RPC11	140	0	34	13	0	1	0	0	0	0	1
Scer_4.343	Spar_4.362	YDR060W	MAK21	1	0	0	0	0	0	0	0	0	0	1
Scer_4.407	Spar_4.420	YDR113C	PDS1	3	5	1	0	0	0	0	0	0	0	1
Scer_4.422	Spar_4.436	YDR127W	ARO1	0	0	0	7	0	0	0	0	0	0	1
Scer_4.446	Spar_4.459	YDR151C	CTH1	10	30	14	9	1	1	1	0	0	0	1
Scer_4.453	Spar_4.466	YDR159W	SAC3	6	28	4	10	1	0	0	0	0	0	1
Scer_4.465	Spar_4.477	YDR170C	SEC7	20	0	47	12	0	1	0	0	0	0	1
Scer_4.474	Spar_4.483	YDR171W	HSP42	3	6	0	0	0	0	0	0	0	0	1
Scer_4.494	Spar_4.503	YDR189W	SLY1	4	9	1	0	0	0	0	0	0	0	1
Scer_4.538	Spar_4.533	YDR219C	MFB1	19	13	2	3	1	0	0	0	0	0	1
Scer_4.541	Spar_4.536	YDR222W	NA	0	0	1	0	0	0	0	0	0	0	1
Scer_4.551	Spar_4.546	YDR233C	RTN1	5	1	3	7	0	0	0	0	0	0	1
Scer_4.58	Spar_4.63	YDL202W	MRPL11	2	0	0	0	0	0	0	0	0	0	1
Scer_4.615	Spar_4.655	YDR279W	RNH202	2	3	0	0	0	0	0	0	0	0	1
Scer_4.624	Spar_4.664	YDR288W	NSE3	2	0	0	0	0	0	0	0	0	0	1
Scer_4.635	Spar_4.675	YDR299W	BFR2	0	0	5	0	0	0	0	0	0	0	1
Scer_4.640	Spar_4.680	YDR304C	CPR5	0	0	2	0	0	0	0	0	0	0	1
Scer_4.65	Spar_4.70	YDL195W	SEC31	40	44	46	66	1	1	1	0	0	0	1
Scer_4.669	Spar_4.701	YDR321W	ASP1	0	0	3	0	0	0	0	0	0	0	1
Scer_4.698	Spar_4.615	YDR347W	MRP1	0	13	16	0	0	0	0	0	0	0	1
Scer_4.708	Spar_4.608	YDR353W	TRR1	0	0	0	19	0	0	0	0	0	0	1
Scer_4.755	Spar_4.740	YDR389W	SAC7	14	8	23	1	1	0	0	0	0	0	1
Scer_4.761	Spar_4.750	YDR394W	RPT3	5	0	1	8	0	0	0	0	0	0	1
Scer_4.821	Spar_4.822	YDR453C	TSA2	0	0	0	9	0	0	0	0	0	0	1
Scer_4.839	Spar_4.841	YDR472W	TRS31	35	53	12	0	1	0	0	0	0	0	1
Scer_5.116	Spar_5.141	YER012W	PRE1	0	0	0	1	0	0	0	0	0	0	1
Scer_5.199	Spar_5.239	YER078C	ICP55	0	0	9	15	0	1	0	0	1	0	1
Scer_5.213	Spar_5.253	YER089C	PTC2	35	30	71	45	1	1	1	0	0	0	1
Scer_5.240	Spar_5.282	YER110C	KAP123	0	0	0	8	0	0	0	0	0	0	1
Scer_5.242	Spar_5.284	YER112W	LSM4	0	0	0	12	0	0	0	0	0	0	1
Scer_5.261	Spar_5.303	YER130C	NA	1	0	0	0	0	0	0	0	0	0	1
Scer_5.316	Spar_5.352	YER158C	NA	1	3	0	0	0	0	0	0	0	0	1
Scer_5.317	Spar_5.353	YER159C	BUR6	3	2	5	12	0	1	0	0	0	0	1
Scer_5.335	Spar_5.366	YER169W	RPH1	0	4	1	1	0	0	0	0	0	0	1
Scer_5.99	Spar_5.121	YEL001C	IRC22	0	0	0	3	0	0	0	0	0	0	1
Scer_6.114	Spar_6.109	YFR010W	UBP6	4	0	9	8	0	1	0	0	0	0	1
Scer_6.45	Spar_6.46	YFL036W	RPO41	8	21	20	17	1	1	1	0	0	0	1
Scer_6.80	Spar_6.84	YFL007W	BLM10	13	23	3	12	1	0	0	0	0	0	1
Scer_7.117	Spar_7.114	YGL163C	RAD54	4	0	0	0	0	0	0	0	0	0	1
Scer_7.119	Spar_7.116	YGL161C	YIP5	11	1	24	0	0	0	0	0	0	0	1
Scer_7.120	Spar_7.117	YGL160W	AIM14	5	9	7	0	1	0	0	0	0	0	1
Scer_7.177	Spar_7.182	YGL101W	NA	0	0	2	0	0	0	0	0	0	0	1
Scer_7.201	Spar_7.208	YGL082W	NA	1	0	0	0	0	0	0	0	0	0	1
Scer_7.213	Spar_7.222	YGL067W	NPY1	7	10	0	14	1	0	0	0	0	0	1
Scer_7.214	Spar_7.223	YGL066W	SGF73	2	9	3	0	0	0	0	0	0	0	1
Scer_7.226	Spar_7.234	YGL055W	OLE1	0	0	1	0	0	0	0	0	0	0	1
Scer_7.250	Spar_7.255	YGL040C	HEM2	7	4	26	26	0	1	0	0	0	0	1
Scer_7.252	Spar_7.260	YGL039W	NA	0	0	1	0	0	0	0	0	0	0	1
Scer_7.256	Spar_7.264	YGL035C	MIG1	0	0	0	10	0	0	0	0	0	0	1
Scer_7.272	Spar_7.281	YGL019W	CKB1	4	0	1	0	0	0	0	0	0	0	1
Scer_7.273	Spar_7.282	YGL018C	JAC1	2	7	0	0	0	0	0	0	0	0	1
Scer_7.29	Spar_7.27	YGL241W	KAP114	0	0	1	0	0	0	0	0	0	0	1
Scer_7.310	Spar_7.318	YGR021W	NA	1	0	0	0	0	0	0	0	0	0	1
Scer_7.369	Spar_7.358	YGR046W	TAM41	13	0	0	0	0	0	0	0	0	0	1
Scer_7.394	Spar_7.383	YGR071C	ENV11	1	10	7	1	0	0	0	0	0	0	1
Scer_7.408	Spar_7.397	YGR086C	PIL1	8	11	11	15	1	1	1	0	0	0	1
Scer_7.411	Spar_7.400	YGR089W	NNF2	3	10	13	7	0	1	0	0	0	0	1
Scer_7.417	Spar_7.408	YGR094W	VAS1	4	0	0	0	0	0	0	0	0	0	1
Scer_7.421	Spar_7.412	YGR098C	ESP1	4	0	10	11	0	1	0	0	0	0	1
Scer_7.492	Spar_7.483	YGR149W	NA	0	4	0	0	0	0	0	0	0	0	1
Scer_7.497	Spar_7.490	YGR152C	RSR1	11	0	0	4	0	0	0	0	0	0	1
Scer_7.534	Spar_7.518	YGR170W	PSD2	3	0	7	5	0	1	0	0	0	0	1
Scer_7.542	Spar_7.530	YGR178C	PBP1	9	2	19	13	0	1	0	0	0	0	1
Scer_7.578	Spar_7.566	YGR209C	TRX2	0	14	0	11	0	0	0	0	0	0	1
Scer_7.615	Spar_7.603	YGR243W	FMP43	0	17	3	16	0	0	0	0	0	0	1
Scer_7.616	Spar_7.604	YGR244C	LSC2	2	3	16	18	0	1	0	0	0	0	1
Scer_7.634	Spar_7.624	YGR262C	BUD32	1	13	0	0	0	0	0	0	0	0	1
Scer_7.636	Spar_7.626	YGR264C	MES1	0	0	2	0	0	0	0	0	0	0	1
Scer_7.657	Spar_7.641	YGR286C	BIO2	5	0	3	0	0	0	0	0	0	0	1
Scer_8.133	Spar_8.116	YHR041C	SRB2	0	0	1	2	0	0	0	0	0	0	1
Scer_8.156	Spar_8.136	YHR059W	FYV4	0	11	0	0	0	0	0	0	0	0	1
Scer_8.174	Spar_8.154	YHR073W	OSH3	0	0	4	0	0	0	0	0	0	0	1
Scer_8.206	Spar_8.187	YHR103W	SBE22	11	0	13	0	0	0	0	0	0	0	1
Scer_8.225	Spar_8.206	YHR122W	CIA2	0	0	1	0	0	0	0	0	0	0	1
Scer_8.250	Spar_8.235	YHR142W	CHS7	0	2	0	0	0	0	0	0	0	0	1
Scer_8.251	Spar_8.236	YHR143W	DSE2	13	20	18	11	1	1	1	0	0	0	1
Scer_8.313	Spar_8.304	YHR196W	UTP9	2	0	5	0	0	0	0	0	0	0	1
Scer_8.323	Spar_8.313	YHR204W	MNL1	4	0	12	17	0	1	0	0	0	0	1
Scer_8.39	Spar_8.30	YHL023C	NPR3	0	0	2	0	0	0	0	0	0	0	1
Scer_9.111	Spar_9.97	YIL085C	KTR7	2	0	1	5	0	0	0	0	0	0	1
Scer_9.119	Spar_9.103	YIL078W	THS1	3	11	0	0	0	0	0	0	0	0	1
Scer_9.130	Spar_9.114	YIL068C	SEC6	9	0	1	0	0	0	0	0	0	0	1
Scer_9.144	Spar_9.125	YIL056W	VHR1	2	23	4	1	0	0	0	0	0	0	1
Scer_9.167	Spar_9.145	YIL036W	CST6	0	6	0	6	0	0	0	0	0	0	1
Scer_9.168	Spar_9.146	YIL035C	CKA1	8	0	18	17	0	1	0	0	0	0	1
Scer_9.41	Spar_9.28	YIL144W	TID3	5	0	0	0	0	0	0	0	0	0	1
Scer_9.55	Spar_9.42	YIL131C	FKH1	10	17	0	0	1	0	0	1	0	0	1
Scer_9.80	Spar_9.67	YIL107C	PFK26	4	8	3	0	0	0	0	0	0	0	1
Scer_9.81	Spar_9.68	YIL106W	MOB1	0	2	5	0	0	0	0	0	0	0	1
Scer_1.27	Spar_1.7	YAL061W	BDH2	2	0	3	0	0	0	0	0	0	0	0
Scer_1.34	Spar_1.16	YAL053W	FLC2	28	17	9	0	1	0	0	0	0	0	0
Scer_1.36	Spar_1.18	YAL049C	AIM2	1	0	0	3	0	0	0	0	0	0	0
Scer_1.44	Spar_1.26	YAL041W	CDC24	0	0	5	37	0	1	0	0	1	0	0
Scer_1.49	Spar_1.31	YAL036C	RBG1	4	3	0	0	0	0	0	0	0	0	0
Scer_1.50	Spar_1.32	YAL035W	FUN12	0	0	3	0	0	0	0	0	0	0	0
Scer_1.64	Spar_1.45	YAL024C	LTE1	0	0	0	1	0	0	0	0	0	0	0
Scer_1.69	Spar_1.51	YAL019W	FUN30	4	0	2	6	0	0	0	0	0	0	0
Scer_1.77	Spar_1.60	YAL012W	CYS3	31	42	28	74	1	1	1	0	0	0	0
Scer_1.81	Spar_1.64	YAL008W	FUN14	1	0	0	0	0	0	0	0	0	0	0
Scer_10.102	Spar_10.102	YJL133W	MRS3	4	0	0	14	0	0	0	0	0	0	0
Scer_10.106	Spar_10.106	YJL129C	TRK1	57	18	19	13	1	1	1	0	0	0	0
Scer_10.114	Spar_10.115	YJL124C	LSM1	51	41	45	24	1	1	1	0	0	0	0
Scer_10.117	Spar_10.118	YJL121C	RPE1	0	0	0	17	0	0	0	0	0	0	0
Scer_10.120	Spar_10.122	YJL117W	PHO86	1	5	2	0	0	0	0	0	0	0	0
Scer_10.138	Spar_10.134	YJL111W	CCT7	0	9	0	0	0	0	0	0	0	0	0
Scer_10.139	Spar_10.135	YJL110C	GZF3	0	0	1	0	0	0	0	0	0	0	0
Scer_10.145	Spar_10.140	YJL104W	PAM16	3	0	4	0	0	0	0	0	0	0	0
Scer_10.149	Spar_10.144	YJL101C	GSH1	15	3	15	33	0	1	0	0	0	0	0
Scer_10.151	Spar_10.146	YJL099W	CHS6	1	0	0	0	0	0	0	0	0	0	0
Scer_10.158	Spar_10.153	YJL092W	SRS2	3	0	1	0	0	0	0	0	0	0	0
Scer_10.160	Spar_10.155	YJL090C	DPB11	8	0	9	0	0	0	0	0	0	0	0
Scer_10.162	Spar_10.157	YJL088W	ARG3	0	2	0	9	0	0	0	0	0	0	0
Scer_10.166	Spar_10.161	YJL084C	ALY2	0	0	0	11	0	0	0	0	0	0	0
Scer_10.170	Spar_10.165	YJL080C	SCP160	294	204	160	91	1	1	1	0	0	0	0
Scer_10.171	Spar_10.166	YJL079C	PRY1	10	0	0	0	0	0	0	0	0	0	0
Scer_10.175	Spar_10.170	YJL076W	NET1	1	2	1	1	0	0	0	0	0	0	0
Scer_10.188	Spar_10.183	YJL061W	NUP82	0	0	2	0	0	0	0	0	0	0	0
Scer_10.193	Spar_10.188	YJL056C	ZAP1	1	0	0	0	0	0	0	0	0	0	0
Scer_10.198	Spar_10.193	YJL052W	TDH1	0	0	0	1	0	0	0	0	0	0	0
Scer_10.204	Spar_10.199	YJL047C	RTT101	1	6	0	0	0	0	0	0	0	0	0
Scer_10.227	Spar_10.227	YJL036W	SNX4	2	0	5	0	0	0	0	0	0	0	0
Scer_10.237	Spar_10.238	YJL026W	RNR2	8	1	11	3	0	0	0	0	0	0	0
Scer_10.24	Spar_10.24	YJL209W	CBP1	1	0	9	12	0	1	0	0	0	0	0
Scer_10.242	Spar_10.249	YJL020C	BBC1	3	11	3	0	0	0	0	0	0	0	0
Scer_10.244	Spar_10.251	YJL016W	NA	3	31	0	0	0	0	0	0	0	0	0
Scer_10.256	Spar_10.264	YJL006C	CTK2	2	0	0	0	0	0	0	0	0	0	0
Scer_10.258	Spar_10.266	YJL005W	CYR1	2	0	4	7	0	0	0	0	0	0	0
Scer_10.261	Spar_10.269	YJL002C	OST1	0	0	0	9	0	0	0	0	0	0	0
Scer_10.271	Spar_10.278	YJR007W	SUI2	25	30	87	100	1	1	1	0	0	0	0
Scer_10.272	Spar_10.279	YJR008W	MHO1	1	3	4	6	0	0	0	0	0	0	0
Scer_10.279	Spar_10.286	YJR014W	TMA22	0	0	0	6	0	0	0	0	0	0	0
Scer_10.309	Spar_10.298	YJR034W	PET191	1	0	0	0	0	0	0	0	0	0	0
Scer_10.325	Spar_10.315	YJR048W	CYC1	0	0	0	7	0	0	0	0	0	0	0
Scer_10.332	Spar_10.324	YJR054W	KCH1	7	0	8	7	0	1	0	0	0	0	0
Scer_10.345	Spar_10.332	YJR056C	NA	15	5	1	21	1	0	0	0	0	0	0
Scer_10.350	Spar_10.336	YJR058C	APS2	6	1	0	0	0	0	0	0	0	0	0
Scer_10.356	Spar_10.342	YJR064W	CCT5	0	0	15	20	0	1	0	0	1	0	0
Scer_10.363	Spar_10.350	YJR072C	NPA3	0	1	0	0	0	0	0	0	0	0	0
Scer_10.367	Spar_10.354	YJR076C	CDC11	1	0	6	0	0	0	0	0	0	0	0
Scer_10.368	Spar_10.355	YJR077C	MIR1	0	0	1	0	0	0	0	0	0	0	0
Scer_10.372	Spar_10.359	YJR082C	EAF6	5	0	4	0	0	0	0	0	0	0	0
Scer_10.378	Spar_10.365	YJR089W	BIR1	1	0	1	0	0	0	0	0	0	0	0
Scer_10.38	Spar_10.37	YJL197W	UBP12	0	0	0	6	0	0	0	0	0	0	0
Scer_10.381	Spar_10.368	YJR092W	BUD4	0	0	2	0	0	0	0	0	0	0	0
Scer_10.382	Spar_10.369	YJR093C	FIP1	4	1	3	0	0	0	0	0	0	0	0
Scer_10.392	Spar_10.384	YJR101W	RSM26	0	0	2	0	0	0	0	0	0	0	0
Scer_10.393	Spar_10.385	YJR102C	VPS25	0	0	4	6	0	0	0	0	0	0	0
Scer_10.395	Spar_10.387	YJR104C	SOD1	0	3	1	6	0	0	0	0	0	0	0
Scer_10.396	Spar_10.388	YJR105W	ADO1	3	0	2	0	0	0	0	0	0	0	0
Scer_10.404	Spar_10.395	YJR111C	NA	4	0	0	4	0	0	0	0	0	0	0
Scer_10.410	Spar_10.400	YJR116W	TDA4	1	36	8	1	0	0	0	0	0	0	0
Scer_10.411	Spar_10.401	YJR117W	STE24	4	0	2	0	0	0	0	0	0	0	0
Scer_10.419	Spar_10.409	YJR125C	ENT3	0	0	5	12	0	1	0	0	1	0	0
Scer_10.427	Spar_10.417	YJR133W	XPT1	5	0	0	0	0	0	0	0	0	0	0
Scer_10.428	Spar_10.418	YJR134C	SGM1	1	14	0	0	0	0	0	0	0	0	0
Scer_10.436	Spar_10.426	YJR141W	NA	4	6	2	1	0	0	0	0	0	0	0
Scer_10.50	Spar_10.49	YJL183W	MNN11	40	20	56	33	1	1	1	0	0	0	0
Scer_10.63	Spar_10.63	YJL168C	SET2	6	4	7	1	0	0	0	0	0	0	0
Scer_10.64	Spar_10.64	YJL167W	ERG20	6	1	2	11	0	0	0	0	0	0	0
Scer_10.66	Spar_10.66	YJL165C	HAL5	0	0	0	1	0	0	0	0	0	0	0
Scer_10.67	Spar_10.67	YJL164C	TPK1	2	0	0	15	0	0	0	0	0	0	0
Scer_10.75	Spar_10.76	YJL158C	CIS3	0	1	1	23	0	0	0	0	0	0	0
Scer_10.79	Spar_10.80	YJL155C	FBP26	3	0	5	0	0	0	0	0	0	0	0
Scer_10.80	Spar_10.81	YJL154C	VPS35	4	0	0	12	0	0	0	0	0	0	0
Scer_10.87	Spar_10.87	YJL147C	NA	0	0	1	0	0	0	0	0	0	0	0
Scer_10.88	Spar_10.88	YJL146W	IDS2	0	1	0	4	0	0	0	0	0	0	0
Scer_10.91	Spar_10.91	YJL143W	TIM17	0	22	0	0	0	0	0	0	0	0	0
Scer_10.92	Spar_10.93	YJL141C	YAK1	0	0	0	1	0	0	0	0	0	0	0
Scer_10.93	Spar_10.94	YJL140W	RPB4	3	5	5	52	0	1	0	0	0	0	0
Scer_10.94	Spar_10.95	YJL139C	YUR1	0	0	1	0	0	0	0	0	0	0	0
Scer_10.96	Spar_10.97	YJL137C	GLG2	0	0	0	10	0	0	0	0	0	0	0
Scer_11.101	Spar_11.123	YKL133C	NA	0	0	5	1	0	0	0	0	0	0	0
Scer_11.103	Spar_11.125	YKL130C	SHE2	8	1	0	0	0	0	0	0	0	0	0
Scer_11.11	Spar_11.14	YKL216W	URA1	30	42	3	6	1	0	0	0	0	0	0
Scer_11.111	Spar_11.135	YKL122C	SRP21	0	0	0	16	0	0	0	0	0	0	0
Scer_11.112	Spar_11.136	YKL121W	DGR2	0	1	1	0	0	0	0	0	0	0	0
Scer_11.113	Spar_11.137	YKL120W	OAC1	0	1	1	0	0	0	0	0	0	0	0
Scer_11.118	Spar_11.141	YKL117W	SBA1	0	7	1	0	0	0	0	0	0	0	0
Scer_11.119	Spar_11.142	YKL116C	PRR1	0	1	0	0	0	0	0	0	0	0	0
Scer_11.123	Spar_11.146	YKL112W	ABF1	43	66	6	14	1	1	1	0	0	0	0
Scer_11.124	Spar_11.147	YKL110C	KTI12	1	0	7	0	0	0	0	0	0	0	0
Scer_11.125	Spar_11.148	YKL109W	HAP4	36	92	18	37	1	1	1	0	0	0	0
Scer_11.129	Spar_11.152	YKL106W	AAT1	1	0	0	0	0	0	0	0	0	0	0
Scer_11.13	Spar_11.16	YKL214C	YRA2	2	0	0	9	0	0	0	0	0	0	0
Scer_11.130	Spar_11.153	YKL105C	SEG2	3	0	2	1	0	0	0	0	0	0	0
Scer_11.137	Spar_11.160	YKL098W	MTC2	6	0	16	0	0	0	0	0	0	0	0
Scer_11.140	Spar_11.162	YKL096W	CWP1	1	0	0	2	0	0	0	0	0	0	0
Scer_11.145	Spar_11.167	YKL091C	NA	0	0	2	0	0	0	0	0	0	0	0
Scer_11.149	Spar_11.172	YKL087C	CYT2	9	15	2	0	1	0	0	0	0	0	0
Scer_11.15	Spar_11.18	YKL212W	SAC1	31	4	22	89	0	1	0	0	0	0	0
Scer_11.151	Spar_11.174	YKL085W	MDH1	0	0	5	0	0	0	0	0	0	0	0
Scer_11.155	Spar_11.178	YKL080W	VMA5	0	6	3	0	0	0	0	0	0	0	0
Scer_11.156	Spar_11.179	YKL079W	SMY1	0	0	2	9	0	0	0	0	0	0	0
Scer_11.158	Spar_11.181	YKL077W	NA	0	0	2	2	0	0	0	0	0	0	0
Scer_11.16	Spar_11.19	YKL211C	TRP3	0	0	0	2	0	0	0	0	0	0	0
Scer_11.174	Spar_11.198	YKL068W	NUP100	2	1	6	0	0	0	0	0	0	0	0
Scer_11.182	Spar_11.202	YKL067W	YNK1	0	0	0	6	0	0	0	0	0	0	0
Scer_11.185	Spar_11.205	YKL064W	MNR2	65	3	135	28	0	1	0	0	0	0	0
Scer_11.188	Spar_11.208	YKL061W	BLI1	0	0	0	1	0	0	0	0	0	0	0
Scer_11.201	Spar_11.221	YKL048C	ELM1	1	0	0	0	0	0	0	0	0	0	0
Scer_11.207	Spar_11.227	YKL042W	SPC42	3	7	1	6	0	0	0	0	0	0	0
Scer_11.208	Spar_11.228	YKL041W	VPS24	10	2	1	0	0	0	0	0	0	0	0
Scer_11.209	Spar_11.229	YKL040C	NFU1	5	0	0	1	0	0	0	0	0	0	0
Scer_11.210	Spar_11.230	YKL039W	PTM1	2	2	8	2	0	0	0	0	0	0	0
Scer_11.213	Spar_11.233	YKL035W	UGP1	4	0	13	17	0	1	0	0	0	0	0
Scer_11.215	Spar_11.235	YKL033W-A	NA	1	4	0	12	0	0	0	0	0	0	0
Scer_11.220	Spar_11.247	YKL029C	MAE1	2	0	5	12	0	1	0	0	0	0	0
Scer_11.223	Spar_11.250	YKL026C	GPX1	0	0	1	0	0	0	0	0	0	0	0
Scer_11.230	Spar_11.257	YKL020C	SPT23	0	0	0	7	0	0	0	0	0	0	0
Scer_11.231	Spar_11.258	YKL019W	RAM2	0	0	15	2	0	0	0	0	0	0	0
Scer_11.235	Spar_11.262	YKL016C	ATP7	1	11	0	0	0	0	0	0	0	0	0
Scer_11.239	Spar_11.267	YKL012W	PRP40	0	4	0	0	0	0	0	0	0	0	0
Scer_11.243	Spar_11.271	YKL008C	LAC1	3	13	0	2	0	0	0	0	0	0	0
Scer_11.248	Spar_11.276	YKL004W	AUR1	131	115	95	59	1	1	1	0	0	0	0
Scer_11.250	Spar_11.278	YKL002W	DID4	0	2	1	0	0	0	0	0	0	0	0
Scer_11.251	Spar_11.279	YKL001C	MET14	8	0	0	0	0	0	0	0	0	0	0
Scer_11.253	Spar_11.281	YKR002W	PAP1	0	2	0	0	0	0	0	0	0	0	0
Scer_11.254	Spar_11.282	YKR003W	OSH6	0	3	13	14	0	1	0	0	0	0	0
Scer_11.265	Spar_11.292	YKR010C	TOF2	1	0	1	10	0	0	0	0	0	0	0
Scer_11.266	Spar_11.293	YKR011C	NA	1	6	2	0	0	0	0	0	0	0	0
Scer_11.269	Spar_11.297	YKR014C	YPT52	2	7	36	56	0	1	0	0	0	0	0
Scer_11.27	Spar_11.30	YKL198C	PTK1	3	1	2	0	0	0	0	0	0	0	0
Scer_11.271	Spar_11.299	YKR016W	FCJ1	0	0	1	0	0	0	0	0	0	0	0
Scer_11.273	Spar_11.300	YKR017C	HEL1	0	6	0	0	0	0	0	0	0	0	0
Scer_11.277	Spar_11.304	YKR021W	ALY1	9	0	14	4	0	0	0	0	0	0	0
Scer_11.278	Spar_11.305	YKR022C	NTR2	4	0	0	2	0	0	0	0	0	0	0
Scer_11.282	Spar_11.309	YKR026C	GCN3	9	24	9	14	1	1	1	0	0	0	0
Scer_11.286	Spar_11.314	YKR027W	BCH2	3	9	0	0	0	0	0	0	0	0	0
Scer_11.291	Spar_11.319	YKR031C	SPO14	9	1	0	0	0	0	0	0	0	0	0
Scer_11.30	Spar_11.47	YKL196C	YKT6	3	3	0	0	0	0	0	0	0	0	0
Scer_11.302	Spar_11.330	YKR039W	GAP1	0	6	0	0	0	0	0	0	0	0	0
Scer_11.310	Spar_11.335	YKR044W	UIP5	2	0	0	0	0	0	0	0	0	0	0
Scer_11.316	Spar_11.341	YKR051W	NA	0	0	10	0	0	0	0	0	0	0	0
Scer_11.317	Spar_11.342	YKR052C	MRS4	1	14	0	0	0	0	0	0	0	0	0
Scer_11.323	Spar_11.348	YKR058W	GLG1	11	8	1	0	1	0	0	0	0	0	0
Scer_11.332	Spar_11.357	YKR067W	GPT2	0	0	1	0	0	0	0	0	0	0	0
Scer_11.337	Spar_11.362	YKR072C	SIS2	2	10	2	0	0	0	0	0	0	0	0
Scer_11.34	Spar_11.51	YKL192C	ACP1	4	9	0	7	0	0	0	0	0	0	0
Scer_11.347	Spar_11.372	YKR081C	RPF2	2	0	0	6	0	0	0	0	0	0	0
Scer_11.348	Spar_11.373	YKR082W	NUP133	0	0	5	0	0	0	0	0	0	0	0
Scer_11.358	Spar_11.384	YKR092C	SRP40	2	0	0	0	0	0	0	0	0	0	0
Scer_11.359	Spar_11.385	YKR093W	PTR2	3	1	6	0	0	0	0	0	0	0	0
Scer_11.365	Spar_11.392	YKR098C	UBP11	1	20	0	6	0	0	0	0	0	0	0
Scer_11.367	Spar_11.394	YKR100C	SKG1	14	3	30	22	0	1	0	0	0	0	0
Scer_11.42	Spar_11.63	YKL186C	MTR2	16	22	9	14	1	1	1	0	0	0	0
Scer_11.43	Spar_11.64	YKL185W	ASH1	12	10	130	127	1	1	1	0	0	0	0
Scer_11.47	Spar_11.67	YKL182W	FAS1	91	175	52	103	1	1	1	0	0	0	0
Scer_11.48	Spar_11.68	YKL181W	PRS1	177	281	133	100	1	1	1	0	0	0	0
Scer_11.54	Spar_11.74	YKL174C	TPO5	0	0	1	0	0	0	0	0	0	0	0
Scer_11.57	Spar_11.77	YKL171W	NNK1	2	0	0	0	0	0	0	0	0	0	0
Scer_11.84	Spar_11.104	YKL151C	NA	0	0	5	0	0	0	0	0	0	0	0
Scer_11.88	Spar_11.110	YKL146W	AVT3	0	0	0	1	0	0	0	0	0	0	0
Scer_11.97	Spar_11.119	YKL138C	MRPL31	0	1	3	5	0	0	0	0	0	0	0
Scer_12.106	Spar_12.90	YLR016C	PML1	31	27	10	0	1	0	0	0	0	0	0
Scer_12.108	Spar_12.92	YLR018C	POM34	2	0	1	0	0	0	0	0	0	0	0
Scer_12.109	Spar_12.93	YLR019W	PSR2	6	3	2	0	0	0	0	0	0	0	0
Scer_12.111	Spar_12.95	YLR021W	IRC25	0	0	1	0	0	0	0	0	0	0	0
Scer_12.115	Spar_12.99	YLR025W	SNF7	26	4	3	1	0	0	0	0	0	0	0
Scer_12.116	Spar_12.100	YLR026C	SED5	18	5	17	10	1	1	1	0	0	0	0
Scer_12.117	Spar_12.101	YLR027C	AAT2	0	2	4	6	0	0	0	0	0	0	0
Scer_12.142	Spar_12.121	YLR045C	STU2	1	0	0	0	0	0	0	0	0	0	0
Scer_12.149	Spar_12.128	YLR052W	IES3	2	2	3	0	0	0	0	0	0	0	0
Scer_12.155	Spar_12.134	YLR058C	SHM2	0	5	1	5	0	0	0	0	0	0	0
Scer_12.157	Spar_12.136	YLR060W	FRS1	0	14	1	6	0	0	0	0	0	0	0
Scer_12.161	Spar_12.140	YLR065C	ENV10	2	0	0	0	0	0	0	0	0	0	0
Scer_12.164	Spar_12.143	YLR068W	FYV7	4	0	0	0	0	0	0	0	0	0	0
Scer_12.169	Spar_12.148	YLR073C	RFU1	10	3	5	9	0	1	0	0	0	0	0
Scer_12.170	Spar_12.149	YLR074C	BUD20	0	3	0	0	0	0	0	0	0	0	0
Scer_12.183	Spar_12.162	YLR088W	GAA1	0	1	0	0	0	0	0	0	0	0	0
Scer_12.185	Spar_12.164	YLR090W	XDJ1	2	0	0	0	0	0	0	0	0	0	0
Scer_12.189	Spar_12.168	YLR094C	GIS3	4	0	0	0	0	0	0	0	0	0	0
Scer_12.190	Spar_12.169	YLR095C	IOC2	0	0	0	1	0	0	0	0	0	0	0
Scer_12.194	Spar_12.173	YLR099C	ICT1	2	6	0	0	0	0	0	0	0	0	0
Scer_12.198	Spar_12.177	YLR103C	CDC45	0	0	2	0	0	0	0	0	0	0	0
Scer_12.204	Spar_12.184	YLR108C	NA	0	14	0	0	0	0	0	0	0	0	0
Scer_12.205	Spar_12.185	YLR109W	AHP1	9	28	0	10	1	0	0	0	0	0	0
Scer_12.209	Spar_12.189	YLR113W	HOG1	26	36	6	1	1	0	0	0	0	0	0
Scer_12.215	Spar_12.197	YLR118C	NA	0	0	0	1	0	0	0	0	0	0	0
Scer_12.219	Spar_12.201	YLR121C	YPS3	3	0	3	0	0	0	0	0	0	0	0
Scer_12.226	Spar_12.209	YLR129W	DIP2	0	2	0	0	0	0	0	0	0	0	0
Scer_12.227	Spar_12.210	YLR130C	ZRT2	5	17	8	14	1	1	1	0	0	0	0
Scer_12.235	Spar_12.218	YLR138W	NHA1	6	18	19	28	1	1	1	0	0	0	0
Scer_12.239	Spar_12.222	YLR142W	PUT1	0	2	0	0	0	0	0	0	0	0	0
Scer_12.246	Spar_12.231	YLR147C	SMD3	4	3	0	0	0	0	0	0	0	0	0
Scer_12.252	Spar_12.237	YLR152C	NA	13	0	12	3	0	0	0	0	0	0	0
Scer_12.318	Spar_12.287	YLR178C	TFS1	1	0	0	0	0	0	0	0	0	0	0
Scer_12.319	Spar_12.288	YLR179C	NA	0	2	0	1	0	0	0	0	0	0	0
Scer_12.321	Spar_12.290	YLR181C	VTA1	0	4	3	3	0	0	0	0	0	0	0
Scer_12.323	Spar_12.292	YLR183C	TOS4	0	5	0	0	0	0	0	0	0	0	0
Scer_12.326	Spar_12.294	YLR186W	EMG1	0	0	0	3	0	0	0	0	0	0	0
Scer_12.327	Spar_12.295	YLR187W	SKG3	25	20	4	21	1	0	0	0	0	0	0
Scer_12.328	Spar_12.296	YLR188W	MDL1	11	3	1	0	0	0	0	0	0	0	0
Scer_12.329	Spar_12.297	YLR189C	ATG26	0	0	1	0	0	0	0	0	0	0	0
Scer_12.330	Spar_12.298	YLR190W	MMR1	1	0	5	0	0	0	0	0	0	0	0
Scer_12.332	Spar_12.300	YLR192C	HCR1	0	2	0	6	0	0	0	0	0	0	0
Scer_12.334	Spar_12.302	YLR194C	NA	0	4	0	0	0	0	0	0	0	0	0
Scer_12.336	Spar_12.304	YLR196W	PWP1	0	0	0	1	0	0	0	0	0	0	0
Scer_12.337	Spar_12.305	YLR197W	NOP56	0	0	2	3	0	0	0	0	0	0	0
Scer_12.339	Spar_12.307	YLR200W	YKE2	0	6	0	0	0	0	0	0	0	0	0
Scer_12.34	Spar_12.13	YLL054C	NA	3	0	0	0	0	0	0	0	0	0	0
Scer_12.342	Spar_12.310	YLR203C	MSS51	0	2	1	8	0	0	0	0	0	0	0
Scer_12.343	Spar_12.311	YLR204W	QRI5	0	0	0	7	0	0	0	0	0	0	0
Scer_12.344	Spar_12.312	YLR205C	HMX1	0	10	0	0	0	0	0	0	0	0	0
Scer_12.346	Spar_12.315	YLR207W	HRD3	0	0	1	1	0	0	0	0	0	0	0
Scer_12.347	Spar_12.316	YLR208W	SEC13	29	15	13	5	1	1	1	0	0	0	0
Scer_12.351	Spar_12.320	YLR212C	TUB4	4	0	0	0	0	0	0	0	0	0	0
Scer_12.355	Spar_12.324	YLR216C	CPR6	1	0	3	0	0	0	0	0	0	0	0
Scer_12.357	Spar_12.327	YLR219W	MSC3	0	8	1	3	0	0	0	0	0	0	0
Scer_12.358	Spar_12.328	YLR220W	CCC1	0	0	2	0	0	0	0	0	0	0	0
Scer_12.362	Spar_12.332	YLR223C	IFH1	1	6	7	9	0	1	0	0	0	0	0
Scer_12.37	Spar_12.15	YLL051C	FRE6	2	0	3	7	0	0	0	0	0	0	0
Scer_12.393	Spar_12.353	YLR243W	GPN3	1	0	3	0	0	0	0	0	0	0	0
Scer_12.402	Spar_12.365	YLR251W	SYM1	2	0	0	0	0	0	0	0	0	0	0
Scer_12.405	Spar_12.368	YLR254C	NDL1	0	1	0	0	0	0	0	0	0	0	0
Scer_12.419	Spar_12.372	YLR257W	NA	46	86	114	21	1	1	1	0	0	0	0
Scer_12.421	Spar_12.374	YLR259C	HSP60	0	0	7	2	0	0	0	0	0	0	0
Scer_12.43	Spar_12.23	YLL043W	FPS1	0	0	0	5	0	0	0	0	0	0	0
Scer_12.431	Spar_12.384	YLR268W	SEC22	1	1	1	0	0	0	0	0	0	0	0
Scer_12.44	Spar_12.24	YLL042C	ATG10	0	0	1	0	0	0	0	0	0	0	0
Scer_12.443	Spar_12.399	YLR278C	NA	0	0	0	9	0	0	0	0	0	0	0
Scer_12.446	Spar_12.403	YLR284C	ECI1	0	1	0	0	0	0	0	0	0	0	0
Scer_12.449	Spar_12.405	YLR286C	CTS1	39	24	56	83	1	1	1	0	0	0	0
Scer_12.450	Spar_12.406	YLR287C	NA	0	0	5	0	0	0	0	0	0	0	0
Scer_12.453	Spar_12.409	YLR289W	GUF1	0	0	1	0	0	0	0	0	0	0	0
Scer_12.457	Spar_12.413	YLR293C	GSP1	0	13	0	8	0	0	0	0	0	0	0
Scer_12.459	Spar_12.415	YLR295C	ATP14	1	1	0	0	0	0	0	0	0	0	0
Scer_12.463	Spar_12.419	YLR299W	ECM38	3	8	3	2	0	0	0	0	0	0	0
Scer_12.465	Spar_12.421	YLR301W	HRI1	0	0	1	0	0	0	0	0	0	0	0
Scer_12.487	Spar_12.442	YLR314C	CDC3	0	11	0	11	0	0	0	0	0	0	0
Scer_12.498	Spar_12.452	YLR326W	NA	0	0	1	6	0	0	0	0	0	0	0
Scer_12.50	Spar_12.32	YLL035W	GRC3	0	0	0	2	0	0	0	0	0	0	0
Scer_12.501	Spar_12.457	YLR328W	NMA1	13	3	14	19	0	1	0	0	0	0	0
Scer_12.504	Spar_12.461	YLR332W	MID2	49	44	28	13	1	1	1	0	0	0	0
Scer_12.508	Spar_12.465	YLR333C	RPS25B	37	40	7	1	1	0	0	0	0	0	0
Scer_12.514	Spar_12.470	YLR340W	RPP0	37	120	15	55	1	1	1	0	0	0	0
Scer_12.523	Spar_12.483	YLR345W	NA	0	10	0	4	0	0	0	0	0	0	0
Scer_12.525	Spar_12.485	YLR347C	KAP95	2	0	0	0	0	0	0	0	0	0	0
Scer_12.529	Spar_12.490	YLR352W	NA	0	0	8	37	0	1	0	0	1	0	0
Scer_12.53	Spar_12.36	YLL032C	NA	0	0	0	1	0	0	0	0	0	0	0
Scer_12.530	Spar_12.491	YLR353W	BUD8	2	0	2	0	0	0	0	0	0	0	0
Scer_12.531	Spar_12.492	YLR354C	TAL1	2	0	0	1	0	0	0	0	0	0	0
Scer_12.532	Spar_12.493	YLR355C	ILV5	11	35	16	11	1	1	1	0	0	0	0
Scer_12.535	Spar_12.496	YLR359W	ADE13	0	17	2	17	0	0	0	0	0	0	0
Scer_12.550	Spar_12.509	YLR372W	SUR4	6	5	26	42	1	1	1	0	0	0	0
Scer_12.554	Spar_12.513	YLR376C	PSY3	1	0	1	10	0	0	0	0	0	0	0
Scer_12.567	Spar_12.526	YLR389C	STE23	0	1	0	0	0	0	0	0	0	0	0
Scer_12.569	Spar_12.528	YLR390W-A	CCW14	4	0	3	2	0	0	0	0	0	0	0
Scer_12.576	Spar_12.535	YLR398C	SKI2	0	0	3	0	0	0	0	0	0	0	0
Scer_12.581	Spar_12.540	YLR403W	SFP1	23	35	1	3	1	0	0	0	0	0	0
Scer_12.59	Spar_12.42	YLL026W	HSP104	2	7	0	2	0	0	0	0	0	0	0
Scer_12.602	Spar_12.554	YLR414C	PUN1	3	0	0	1	0	0	0	0	0	0	0
Scer_12.606	Spar_12.558	YLR418C	CDC73	0	0	3	0	0	0	0	0	0	0	0
Scer_12.612	Spar_12.563	YLR421C	RPN13	3	0	0	0	0	0	0	0	0	0	0
Scer_12.613	Spar_12.564	YLR422W	NA	3	0	7	21	0	1	0	0	0	0	0
Scer_12.625	Spar_12.568	YLR425W	TUS1	22	3	10	6	0	1	0	0	0	0	0
Scer_12.627	Spar_12.570	YLR427W	MAG2	0	0	1	0	0	0	0	0	0	0	0
Scer_12.629	Spar_12.573	YLR430W	SEN1	52	42	12	20	1	1	1	0	0	0	0
Scer_12.630	Spar_12.574	YLR431C	ATG23	0	0	5	7	0	1	0	0	1	0	0
Scer_12.636	Spar_12.580	YLR437C	DIF1	2	1	0	1	0	0	0	0	0	0	0
Scer_12.647	Spar_12.591	YLR447C	VMA6	2	0	0	0	0	0	0	0	0	0	0
Scer_12.648	Spar_12.592	YLR448W	RPL6B	1	2	0	0	0	0	0	0	0	0	0
Scer_12.649	Spar_12.593	YLR449W	FPR4	3	1	2	4	0	0	0	0	0	0	0
Scer_12.654	Spar_12.598	YLR454W	FMP27	0	0	3	1	0	0	0	0	0	0	0
Scer_12.69	Spar_12.53	YLL019C	KNS1	3	0	3	5	0	0	0	0	0	0	0
Scer_12.71	Spar_12.55	YLL018C	DPS1	0	0	0	5	0	0	0	0	0	0	0
Scer_12.79	Spar_12.62	YLL010C	PSR1	39	19	21	27	1	1	1	0	0	0	0
Scer_12.95	Spar_12.77	YLR006C	SSK1	9	20	11	0	1	0	0	0	0	0	0
Scer_12.97	Spar_12.79	YLR008C	PAM18	0	0	1	15	0	0	0	0	0	0	0
Scer_12.98	Spar_12.80	YLR009W	RLP24	84	51	393	242	1	1	1	0	0	0	0
Scer_13.103	Spar_13.101	YML052W	SUR7	0	0	1	0	0	0	0	0	0	0	0
Scer_13.107	Spar_13.106	YML048W	GSF2	2	0	1	0	0	0	0	0	0	0	0
Scer_13.120	Spar_13.111	YML043C	RRN11	2	0	6	2	0	0	0	0	0	0	0
Scer_13.122	Spar_13.113	YML041C	VPS71	0	0	4	0	0	0	0	0	0	0	0
Scer_13.134	Spar_13.118	YML035C	AMD1	9	18	2	4	1	0	0	0	0	0	0
Scer_13.139	Spar_13.123	YML030W	RCF1	5	0	0	8	0	0	0	0	0	0	0
Scer_13.141	Spar_13.125	YML028W	TSA1	1	4	5	44	0	1	0	0	0	0	0
Scer_13.142	Spar_13.126	YML027W	YOX1	0	0	7	0	0	0	0	0	0	0	0
Scer_13.146	Spar_13.130	YML023C	NSE5	14	3	1	22	0	0	0	0	0	0	0
Scer_13.149	Spar_13.133	YML020W	NA	0	0	5	5	0	1	0	0	1	0	0
Scer_13.151	Spar_13.135	YML018C	NA	12	3	2	10	0	0	0	0	0	0	0
Scer_13.153	Spar_13.137	YML016C	PPZ1	8	7	7	11	1	1	1	0	0	0	0
Scer_13.16	Spar_13.13	YML128C	MSC1	10	2	5	1	0	0	0	0	0	0	0
Scer_13.161	Spar_13.145	YML008C	ERG6	0	0	0	2	0	0	0	0	0	0	0
Scer_13.162	Spar_13.147	YML007W	YAP1	2	0	7	49	0	1	0	0	0	0	0
Scer_13.170	Spar_13.156	YML001W	YPT7	11	12	5	16	1	1	1	0	0	0	0
Scer_13.171	Spar_13.157	YMR001C	CDC5	4	14	2	6	0	0	0	0	0	0	0
Scer_13.173	Spar_13.159	YMR002W	MIC17	1	9	8	26	0	1	0	0	0	0	0
Scer_13.176	Spar_13.162	YMR005W	TAF4	1	0	0	0	0	0	0	0	0	0	0
Scer_13.181	Spar_13.167	YMR010W	NA	63	67	23	50	1	1	1	0	0	0	0
Scer_13.188	Spar_13.176	YMR015C	ERG5	1	0	1	0	0	0	0	0	0	0	0
Scer_13.189	Spar_13.177	YMR016C	SOK2	6	2	7	9	0	1	0	0	0	0	0
Scer_13.193	Spar_13.181	YMR020W	FMS1	2	0	0	14	0	0	0	0	0	0	0
Scer_13.200	Spar_13.189	YMR026C	PEX12	8	21	5	0	1	0	0	0	0	0	0
Scer_13.204	Spar_13.193	YMR030W	RSF1	1	0	0	0	0	0	0	0	0	0	0
Scer_13.210	Spar_13.199	YMR034C	NA	5	0	4	0	0	0	0	0	0	0	0
Scer_13.213	Spar_13.202	YMR037C	MSN2	0	0	29	0	0	0	0	0	0	0	0
Scer_13.215	Spar_13.204	YMR039C	SUB1	4	0	0	4	0	0	0	0	0	0	0
Scer_13.219	Spar_13.208	YMR042W	ARG80	3	13	1	0	0	0	0	0	0	0	0
Scer_13.220	Spar_13.209	YMR043W	MCM1	12	20	17	9	1	1	1	0	0	0	0
Scer_13.23	Spar_13.20	YML121W	GTR1	1	0	2	0	0	0	0	0	0	0	0
Scer_13.233	Spar_13.215	YMR047C	NUP116	3	2	0	0	0	0	0	0	0	0	0
Scer_13.252	Spar_13.225	YMR055C	BUB2	5	5	0	0	1	0	0	1	0	0	0
Scer_13.268	Spar_13.241	YMR071C	TVP18	0	1	0	0	0	0	0	0	0	0	0
Scer_13.272	Spar_13.245	YMR075W	RCO1	1	0	13	1	0	0	0	0	0	0	0
Scer_13.277	Spar_13.252	YMR079W	SEC14	1	0	1	0	0	0	0	0	0	0	0
Scer_13.278	Spar_13.253	YMR080C	NAM7	0	2	2	0	0	0	0	0	0	0	0
Scer_13.279	Spar_13.254	YMR081C	ISF1	0	0	0	1	0	0	0	0	0	0	0
Scer_13.284	Spar_13.258	YMR086W	SEG1	0	26	0	0	0	0	0	0	0	0	0
Scer_13.286	Spar_13.260	YMR087W	NA	0	10	0	3	0	0	0	0	0	0	0
Scer_13.291	Spar_13.265	YMR092C	AIP1	8	0	12	1	0	0	0	0	0	0	0
Scer_13.297	Spar_13.271	YMR098C	ATP25	2	0	0	0	0	0	0	0	0	0	0
Scer_13.302	Spar_13.275	YMR099C	NA	0	0	0	1	0	0	0	0	0	0	0
Scer_13.303	Spar_13.276	YMR100W	MUB1	13	16	30	45	1	1	1	0	0	0	0
Scer_13.305	Spar_13.278	YMR102C	NA	34	46	12	25	1	1	1	0	0	0	0
Scer_13.31	Spar_13.28	YML113W	DAT1	1	0	0	0	0	0	0	0	0	0	0
Scer_13.315	Spar_13.288	YMR108W	ILV2	55	90	31	23	1	1	1	0	0	0	0
Scer_13.318	Spar_13.291	YMR111C	NA	0	5	0	0	0	0	0	0	0	0	0
Scer_13.321	Spar_13.294	YMR114C	NA	0	0	1	0	0	0	0	0	0	0	0
Scer_13.333	Spar_13.300	YMR119W	ASI1	9	0	13	16	0	1	0	0	0	0	0
Scer_13.340	Spar_13.308	YMR124W	NA	0	0	0	1	0	0	0	0	0	0	0
Scer_13.342	Spar_13.310	YMR126C	DLT1	0	6	0	0	0	0	0	0	0	0	0
Scer_13.343	Spar_13.311	YMR127C	SAS2	1	0	0	0	0	0	0	0	0	0	0
Scer_13.350	Spar_13.318	YMR134W	NA	0	0	4	0	0	0	0	0	0	0	0
Scer_13.353	Spar_13.321	YMR136W	GAT2	0	0	3	0	0	0	0	0	0	0	0
Scer_13.36	Spar_13.33	YML108W	NA	0	14	0	7	0	0	0	0	0	0	0
Scer_13.363	Spar_13.330	YMR145C	NDE1	3	23	0	0	0	0	0	0	0	0	0
Scer_13.364	Spar_13.331	YMR146C	TIF34	20	21	0	0	1	0	0	1	0	0	0
Scer_13.38	Spar_13.35	YML106W	URA5	149	94	133	180	1	1	1	0	0	0	0
Scer_13.381	Spar_13.351	YMR161W	HLJ1	0	0	0	1	0	0	0	0	0	0	0
Scer_13.382	Spar_13.352	YMR162C	DNF3	0	2	3	7	0	0	0	0	0	0	0
Scer_13.383	Spar_13.353	YMR163C	INP2	3	0	0	2	0	0	0	0	0	0	0
Scer_13.389	Spar_13.360	YMR168C	CEP3	0	0	1	0	0	0	0	0	0	0	0
Scer_13.390	Spar_13.361	YMR170C	ALD2	0	0	0	2	0	0	0	0	0	0	0
Scer_13.391	Spar_13.362	YMR169C	ALD3	1	14	12	0	0	0	0	0	0	0	0
Scer_13.398	Spar_13.371	YMR176W	ECM5	0	9	0	11	0	0	0	0	0	0	0
Scer_13.399	Spar_13.372	YMR177W	MMT1	0	10	1	4	0	0	0	0	0	0	0
Scer_13.40	Spar_13.37	YML104C	MDM1	0	0	7	3	0	0	0	0	0	0	0
Scer_13.403	Spar_13.376	YMR181C	NA	4	0	11	7	0	1	0	0	0	0	0
Scer_13.404	Spar_13.377	YMR182C	RGM1	10	11	0	0	1	0	0	1	0	0	0
Scer_13.406	Spar_13.378	YMR183C	SSO2	5	0	6	2	0	0	0	0	0	0	0
Scer_13.421	Spar_13.392	YMR195W	ICY1	23	27	28	7	1	1	1	0	0	0	0
Scer_13.423	Spar_13.394	YMR197C	VTI1	2	33	0	0	0	0	0	0	0	0	0
Scer_13.425	Spar_13.396	YMR199W	CLN1	7	0	2	0	0	0	0	0	0	0	0
Scer_13.426	Spar_13.397	YMR200W	ROT1	8	7	2	11	1	0	0	0	0	0	0
Scer_13.428	Spar_13.399	YMR202W	ERG2	0	5	0	0	0	0	0	0	0	0	0
Scer_13.469	Spar_13.429	YMR241W	YHM2	20	10	11	6	1	1	1	0	0	0	0
Scer_13.472	Spar_13.432	YMR243C	ZRC1	5	0	8	15	0	1	0	0	0	0	0
Scer_13.48	Spar_13.44	YML098W	TAF13	0	2	0	0	0	0	0	0	0	0	0
Scer_13.485	Spar_13.443	YMR251W-A	HOR7	0	4	0	6	0	0	0	0	0	0	0
Scer_13.497	Spar_13.456	YMR263W	SAP30	0	17	0	7	0	0	0	0	0	0	0
Scer_13.501	Spar_13.460	YMR267W	PPA2	2	0	1	0	0	0	0	0	0	0	0
Scer_13.503	Spar_13.462	YMR269W	TMA23	0	0	1	0	0	0	0	0	0	0	0
Scer_13.504	Spar_13.463	YMR270C	RRN9	16	36	7	6	1	1	1	0	0	0	0
Scer_13.519	Spar_13.475	YMR281W	GPI12	4	0	0	0	0	0	0	0	0	0	0
Scer_13.529	Spar_13.484	YMR287C	DSS1	4	0	0	0	0	0	0	0	0	0	0
Scer_13.54	Spar_13.50	YML092C	PRE8	0	0	3	0	0	0	0	0	0	0	0
Scer_13.541	Spar_13.496	YMR298W	LIP1	0	3	0	0	0	0	0	0	0	0	0
Scer_13.543	Spar_13.498	YMR300C	ADE4	3	0	1	0	0	0	0	0	0	0	0
Scer_13.544	Spar_13.499	YMR301C	ATM1	1	0	0	0	0	0	0	0	0	0	0
Scer_13.547	Spar_13.502	YMR304W	UBP15	8	0	1	5	0	0	0	0	0	0	0
Scer_13.549	Spar_13.504	YMR305C	SCW10	22	11	7	25	1	1	1	0	0	0	0
Scer_13.55	Spar_13.51	YML091C	RPM2	7	7	3	19	1	0	0	0	0	0	0
Scer_13.553	Spar_13.508	YMR309C	NIP1	0	5	0	4	0	0	0	0	0	0	0
Scer_13.554	Spar_13.509	YMR310C	NA	0	0	0	10	0	0	0	0	0	0	0
Scer_13.556	Spar_13.511	YMR312W	ELP6	0	5	0	0	0	0	0	0	0	0	0
Scer_13.559	Spar_13.514	YMR315W	NA	0	0	1	0	0	0	0	0	0	0	0
Scer_13.561	Spar_13.515	YMR316W	DIA1	0	0	3	0	0	0	0	0	0	0	0
Scer_13.66	Spar_13.62	YML081W	TDA9	5	13	4	0	1	0	0	0	0	0	0
Scer_13.75	Spar_13.71	YML072C	TCB3	6	0	69	5	0	1	0	0	0	0	0
Scer_13.76	Spar_13.72	YML071C	COG8	2	0	0	0	0	0	0	0	0	0	0
Scer_13.84	Spar_13.83	YML065W	ORC1	0	4	0	3	0	0	0	0	0	0	0
Scer_13.85	Spar_13.84	YML064C	TEM1	3	0	0	0	0	0	0	0	0	0	0
Scer_13.92	Spar_13.91	YML058W	SML1	2	20	30	35	0	1	0	0	0	0	0
Scer_14.100	Spar_14.89	YNL254C	RTC4	0	0	0	8	0	0	0	0	0	0	0
Scer_14.103	Spar_14.92	YNL251C	NRD1	22	27	21	15	1	1	1	0	0	0	0
Scer_14.132	Spar_14.121	YNL220W	ADE12	19	19	23	27	1	1	1	0	0	0	0
Scer_14.133	Spar_14.122	YNL219C	ALG9	14	1	12	63	0	1	0	0	0	0	0
Scer_14.136	Spar_14.125	YNL216W	RAP1	0	0	1	0	0	0	0	0	0	0	0
Scer_14.137	Spar_14.126	YNL215W	IES2	0	7	0	0	0	0	0	0	0	0	0
Scer_14.151	Spar_14.139	YNL200C	NA	0	0	1	0	0	0	0	0	0	0	0
Scer_14.163	Spar_14.151	YNL188W	KAR1	0	9	0	0	0	0	0	0	0	0	0
Scer_14.164	Spar_14.152	YNL187W	SWT21	1	0	1	0	0	0	0	0	0	0	0
Scer_14.165	Spar_14.153	YNL186W	UBP10	5	0	13	42	0	1	0	0	0	0	0
Scer_14.168	Spar_14.156	YNL183C	NPR1	14	0	3	1	0	0	0	0	0	0	0
Scer_14.173	Spar_14.161	YNL178W	RPS3	0	4	0	0	0	0	0	0	0	0	0
Scer_14.178	Spar_14.166	YNL172W	APC1	0	0	2	0	0	0	0	0	0	0	0
Scer_14.181	Spar_14.171	YNL167C	SKO1	25	8	10	21	1	1	1	0	0	0	0
Scer_14.188	Spar_14.178	YNL161W	CBK1	3	34	7	38	0	1	0	0	0	0	0
Scer_14.192	Spar_14.182	YNL157W	IGO1	2	0	0	7	0	0	0	0	0	0	0
Scer_14.193	Spar_14.183	YNL156C	NSG2	66	52	101	50	1	1	1	0	0	0	0
Scer_14.194	Spar_14.184	YNL155W	NA	6	0	3	28	0	0	0	0	0	0	0
Scer_14.195	Spar_14.185	YNL154C	YCK2	20	41	7	37	1	1	1	0	0	0	0
Scer_14.199	Spar_14.189	YNL149C	PGA2	10	13	6	3	1	0	0	0	0	0	0
Scer_14.200	Spar_14.190	YNL148C	ALF1	1	0	0	0	0	0	0	0	0	0	0
Scer_14.205	Spar_14.194	YNL144C	NA	0	8	0	0	0	0	0	0	0	0	0
Scer_14.207	Spar_14.196	YNL142W	MEP2	11	20	4	9	1	0	0	0	0	0	0
Scer_14.212	Spar_14.201	YNL137C	NAM9	14	11	10	2	1	0	0	0	0	0	0
Scer_14.222	Spar_14.210	YNL129W	NRK1	0	0	6	0	0	0	0	0	0	0	0
Scer_14.227	Spar_14.215	YNL124W	NAF1	0	0	0	5	0	0	0	0	0	0	0
Scer_14.230	Spar_14.218	YNL121C	TOM70	0	4	0	0	0	0	0	0	0	0	0
Scer_14.232	Spar_14.220	YNL118C	DCP2	0	0	4	0	0	0	0	0	0	0	0
Scer_14.239	Spar_14.227	YNL111C	CYB5	0	0	0	2	0	0	0	0	0	0	0
Scer_14.245	Spar_14.233	YNL103W	MET4	0	0	10	16	0	1	0	0	1	0	0
Scer_14.247	Spar_14.235	YNL101W	AVT4	11	3	2	0	0	0	0	0	0	0	0
Scer_14.256	Spar_14.246	YNL094W	APP1	17	21	25	8	1	1	1	0	0	0	0
Scer_14.259	Spar_14.249	YNL091W	NST1	4	0	19	3	0	0	0	0	0	0	0
Scer_14.260	Spar_14.250	YNL090W	RHO2	4	41	5	6	0	1	0	0	0	0	0
Scer_14.261	Spar_14.251	YNL088W	TOP2	0	1	0	0	0	0	0	0	0	0	0
Scer_14.270	Spar_14.259	YNL080C	EOS1	0	0	2	0	0	0	0	0	0	0	0
Scer_14.271	Spar_14.260	YNL079C	TPM1	1	5	13	1	0	0	0	0	0	0	0
Scer_14.273	Spar_14.262	YNL077W	APJ1	5	0	10	17	0	1	0	0	0	0	0
Scer_14.275	Spar_14.264	YNL075W	IMP4	9	0	0	0	0	0	0	0	0	0	0
Scer_14.285	Spar_14.273	YNL067W	RPL9B	0	0	0	2	0	0	0	0	0	0	0
Scer_14.287	Spar_14.275	YNL065W	AQR1	0	0	3	0	0	0	0	0	0	0	0
Scer_14.289	Spar_14.277	YNL063W	MTQ1	6	12	23	53	1	1	1	0	0	0	0
Scer_14.291	Spar_14.279	YNL061W	NOP2	0	4	0	0	0	0	0	0	0	0	0
Scer_14.305	Spar_14.286	YNL053W	MSG5	0	9	0	0	0	0	0	0	0	0	0
Scer_14.311	Spar_14.292	YNL047C	SLM2	0	0	0	9	0	0	0	0	0	0	0
Scer_14.323	Spar_14.316	YNL036W	NCE103	5	6	6	23	1	1	1	0	0	0	0
Scer_14.34	Spar_14.24	YNL310C	ZIM17	0	2	0	0	0	0	0	0	0	0	0
Scer_14.344	Spar_14.333	YNL027W	CRZ1	0	0	1	0	0	0	0	0	0	0	0
Scer_14.351	Spar_14.340	YNL021W	HDA1	1	0	3	3	0	0	0	0	0	0	0
Scer_14.352	Spar_14.341	YNL020C	ARK1	0	6	0	8	0	0	0	0	0	0	0
Scer_14.358	Spar_14.348	YNL016W	PUB1	2	13	8	6	0	1	0	0	0	0	0
Scer_14.362	Spar_14.352	YNL011C	NA	4	0	0	0	0	0	0	0	0	0	0
Scer_14.363	Spar_14.353	YNL010W	NA	0	0	1	0	0	0	0	0	0	0	0
Scer_14.366	Spar_14.356	YNL007C	SIS1	8	11	23	9	1	1	1	0	0	0	0
Scer_14.37	Spar_14.27	YNL307C	MCK1	4	4	6	8	0	1	0	0	0	0	0
Scer_14.372	Spar_14.362	YNL001W	DOM34	6	1	1	1	0	0	0	0	0	0	0
Scer_14.389	Spar_14.376	YNR012W	URK1	2	0	3	0	0	0	0	0	0	0	0
Scer_14.391	Spar_14.378	YNR014W	NA	0	0	1	0	0	0	0	0	0	0	0
Scer_14.394	Spar_14.381	YNR017W	TIM23	15	69	30	18	1	1	1	0	0	0	0
Scer_14.395	Spar_14.382	YNR018W	RCF2	2	0	0	5	0	0	0	0	0	0	0
Scer_14.399	Spar_14.386	YNR022C	MRPL50	1	0	0	0	0	0	0	0	0	0	0
Scer_14.401	Spar_14.388	YNR024W	MPP6	0	0	7	1	0	0	0	0	0	0	0
Scer_14.408	Spar_14.395	YNR032W	PPG1	0	9	6	29	0	1	0	0	0	0	0
Scer_14.411	Spar_14.398	YNR034W	SOL1	0	0	2	0	0	0	0	0	0	0	0
Scer_14.428	Spar_14.415	YNR051C	BRE5	173	35	176	196	1	1	1	0	0	0	0
Scer_14.429	Spar_14.416	YNR052C	POP2	8	9	1	0	1	0	0	0	0	0	0
Scer_14.431	Spar_14.418	YNR054C	ESF2	0	0	0	2	0	0	0	0	0	0	0
Scer_14.437	Spar_14.426	YNR055C	HOL1	6	0	3	0	0	0	0	0	0	0	0
Scer_14.44	Spar_14.34	YNL300W	TOS6	2	4	8	13	0	1	0	0	0	0	0
Scer_14.48	Spar_14.40	YNL295W	NA	0	0	3	3	0	0	0	0	0	0	0
Scer_14.54	Spar_14.46	YNL289W	PCL1	1	0	0	0	0	0	0	0	0	0	0
Scer_14.55	Spar_14.47	YNL288W	CAF40	23	54	48	70	1	1	1	0	0	0	0
Scer_14.56	Spar_14.48	YNL287W	SEC21	17	27	29	25	1	1	1	0	0	0	0
Scer_14.57	Spar_14.49	YNL286W	CUS2	137	54	16	15	1	1	1	0	0	0	0
Scer_14.74	Spar_14.65	YNL280C	ERG24	3	10	0	0	0	0	0	0	0	0	0
Scer_14.79	Spar_14.69	YNL275W	BOR1	1	0	0	0	0	0	0	0	0	0	0
Scer_14.82	Spar_14.72	YNL272C	SEC2	0	0	1	1	0	0	0	0	0	0	0
Scer_14.83	Spar_14.73	YNL271C	BNI1	2	28	4	9	0	0	0	0	0	0	0
Scer_14.87	Spar_14.77	YNL267W	PIK1	1	12	0	0	0	0	0	0	0	0	0
Scer_14.91	Spar_14.80	YNL263C	YIF1	5	6	6	21	1	1	1	0	0	0	0
Scer_15.100	Spar_15.87	YOL089C	HAL9	1	0	0	0	0	0	0	0	0	0	0
Scer_15.102	Spar_15.89	YOL087C	DUF1	10	28	1	0	1	0	0	0	0	0	0
Scer_15.104	Spar_15.91	YOL086C	ADH1	0	0	27	101	0	1	0	0	1	0	0
Scer_15.129	Spar_15.116	YOL061W	PRS5	43	41	0	0	1	0	0	1	0	0	0
Scer_15.132	Spar_15.119	YOL058W	ARG1	0	0	0	20	0	0	0	0	0	0	0
Scer_15.152	Spar_15.142	YOL043C	NTG2	1	17	0	0	0	0	0	0	0	0	0
Scer_15.157	Spar_15.147	YOL038W	PRE6	0	0	0	1	0	0	0	0	0	0	0
Scer_15.158	Spar_15.148	YOL036W	NA	171	122	60	36	1	1	1	0	0	0	0
Scer_15.161	Spar_15.151	YOL032W	OPI10	0	0	3	3	0	0	0	0	0	0	0
Scer_15.163	Spar_15.153	YOL030W	GAS5	0	0	4	7	0	0	0	0	0	0	0
Scer_15.166	Spar_15.155	YOL027C	MDM38	1	0	3	5	0	0	0	0	0	0	0
Scer_15.171	Spar_15.160	YOL023W	IFM1	0	0	5	0	0	0	0	0	0	0	0
Scer_15.178	Spar_15.167	YOL019W	NA	0	1	0	0	0	0	0	0	0	0	0
Scer_15.179	Spar_15.168	YOL018C	TLG2	22	3	33	0	0	0	0	0	0	0	0
Scer_15.181	Spar_15.170	YOL016C	CMK2	1	0	0	0	0	0	0	0	0	0	0
Scer_15.186	Spar_15.177	YOL013C	HRD1	2	0	0	0	0	0	0	0	0	0	0
Scer_15.187	Spar_15.178	YOL012C	HTZ1	20	4	63	90	0	1	0	0	0	0	0
Scer_15.190	Spar_15.181	YOL009C	MDM12	1	0	0	0	0	0	0	0	0	0	0
Scer_15.193	Spar_15.184	YOL006C	TOP1	0	0	7	1	0	0	0	0	0	0	0
Scer_15.194	Spar_15.185	YOL005C	RPB11	0	0	0	7	0	0	0	0	0	0	0
Scer_15.198	Spar_15.190	YOL001W	PHO80	48	6	32	9	1	1	1	0	0	0	0
Scer_15.207	Spar_15.202	YOR008C	SLG1	29	50	25	59	1	1	1	0	0	0	0
Scer_15.220	Spar_15.211	YOR016C	ERP4	0	0	21	3	0	0	0	0	0	0	0
Scer_15.224	Spar_15.215	YOR020C	HSP10	0	0	2	13	0	0	0	0	0	0	0
Scer_15.232	Spar_15.223	YOR027W	STI1	8	33	3	12	1	0	0	0	0	0	0
Scer_15.249	Spar_15.243	YOR044W	IRC23	0	0	11	5	0	1	0	0	1	0	0
Scer_15.257	Spar_15.250	YOR051C	ETT1	0	13	2	0	0	0	0	0	0	0	0
Scer_15.259	Spar_15.252	YOR054C	VHS3	2	0	0	0	0	0	0	0	0	0	0
Scer_15.261	Spar_15.254	YOR057W	SGT1	4	0	0	1	0	0	0	0	0	0	0
Scer_15.271	Spar_15.264	YOR064C	YNG1	4	0	3	0	0	0	0	0	0	0	0
Scer_15.276	Spar_15.269	YOR070C	GYP1	2	10	0	0	0	0	0	0	0	0	0
Scer_15.295	Spar_15.291	YOR084W	LPX1	0	0	0	6	0	0	0	0	0	0	0
Scer_15.296	Spar_15.292	YOR085W	OST3	1	0	0	0	0	0	0	0	0	0	0
Scer_15.299	Spar_15.295	YOR087W	YVC1	0	0	4	0	0	0	0	0	0	0	0
Scer_15.300	Spar_15.296	YOR089C	VPS21	0	0	0	13	0	0	0	0	0	0	0
Scer_15.302	Spar_15.298	YOR091W	TMA46	0	0	26	10	0	1	0	0	1	0	0
Scer_15.305	Spar_15.301	YOR094W	ARF3	23	11	2	11	1	0	0	0	0	0	0
Scer_15.308	Spar_15.304	YOR097C	NA	0	0	0	7	0	0	0	0	0	0	0
Scer_15.312	Spar_15.308	YOR101W	RAS1	13	14	0	3	1	0	0	0	0	0	0
Scer_15.313	Spar_15.309	YOR103C	OST2	95	39	3	0	1	0	0	0	0	0	0
Scer_15.335	Spar_4.729	YOR127W	RGA1	3	0	0	0	0	0	0	0	0	0	0
Scer_15.337	Spar_4.731	YOR129C	AFI1	0	0	2	0	0	0	0	0	0	0	0
Scer_15.340	Spar_4.734	YOR131C	NA	0	2	3	0	0	0	0	0	0	0	0
Scer_15.341	Spar_4.735	YOR132W	VPS17	9	0	0	0	0	0	0	0	0	0	0
Scer_15.345	Spar_15.327	YOR137C	SIA1	5	0	0	0	0	0	0	0	0	0	0
Scer_15.35	Spar_15.24	YOL146W	PSF3	0	0	0	4	0	0	0	0	0	0	0
Scer_15.36	Spar_15.25	YOL145C	CTR9	0	0	0	1	0	0	0	0	0	0	0
Scer_15.362	Spar_15.337	YOR143C	THI80	0	0	2	6	0	0	0	0	0	0	0
Scer_15.366	Spar_15.341	YOR148C	SPP2	0	0	1	0	0	0	0	0	0	0	0
Scer_15.368	Spar_15.343	YOR150W	MRPL23	0	0	0	3	0	0	0	0	0	0	0
Scer_15.370	Spar_15.345	YOR152C	NA	4	7	1	9	0	0	0	0	0	0	0
Scer_15.372	Spar_15.347	YOR154W	SLP1	0	0	6	0	0	0	0	0	0	0	0
Scer_15.373	Spar_15.348	YOR155C	ISN1	0	0	5	1	0	0	0	0	0	0	0
Scer_15.38	Spar_15.27	YOL143C	RIB4	4	4	0	0	0	0	0	0	0	0	0
Scer_15.385	Spar_15.359	YOR166C	SWT1	0	0	0	4	0	0	0	0	0	0	0
Scer_15.390	Spar_15.364	YOR172W	YRM1	3	0	29	5	0	1	0	0	0	0	0
Scer_15.406	Spar_15.378	YOR181W	LAS17	0	2	5	10	0	1	0	0	0	0	0
Scer_15.410	Spar_15.382	YOR185C	GSP2	1	0	0	0	0	0	0	0	0	0	0
Scer_15.412	Spar_15.384	YOR187W	TUF1	12	6	10	9	1	1	1	0	0	0	0
Scer_15.414	Spar_15.386	YOR189W	IES4	0	0	5	0	0	0	0	0	0	0	0
Scer_15.416	Spar_15.388	YOR191W	ULS1	0	0	2	3	0	0	0	0	0	0	0
Scer_15.430	Spar_15.400	YOR193W	PEX27	0	0	6	0	0	0	0	0	0	0	0
Scer_15.432	Spar_15.402	YOR195W	SLK19	0	4	0	0	0	0	0	0	0	0	0
Scer_15.433	Spar_15.403	YOR196C	LIP5	2	0	0	0	0	0	0	0	0	0	0
Scer_15.444	Spar_15.414	YOR208W	PTP2	5	13	2	3	1	0	0	0	0	0	0
Scer_15.445	Spar_15.415	YOR209C	NPT1	24	23	10	13	1	1	1	0	0	0	0
Scer_15.447	Spar_15.417	YOR211C	MGM1	21	23	4	0	1	0	0	0	0	0	0
Scer_15.449	Spar_15.419	YOR213C	SAS5	0	5	1	1	0	0	0	0	0	0	0
Scer_15.45	Spar_15.34	YOL136C	PFK27	12	33	2	8	1	0	0	0	0	0	0
Scer_15.454	Spar_15.424	YOR219C	STE13	2	5	1	3	0	0	0	0	0	0	0
Scer_15.457	Spar_15.427	YOR222W	ODC2	20	12	4	6	1	0	0	0	0	0	0
Scer_15.464	Spar_15.436	YOR229W	WTM2	0	2	0	0	0	0	0	0	0	0	0
Scer_15.481	Spar_15.452	YOR246C	ENV9	12	1	8	7	0	1	0	0	0	0	0
Scer_15.486	Spar_15.457	YOR252W	TMA16	0	1	0	0	0	0	0	0	0	0	0
Scer_15.491	Spar_15.462	YOR257W	CDC31	0	0	0	7	0	0	0	0	0	0	0
Scer_15.495	Spar_15.466	YOR261C	RPN8	8	0	24	7	0	1	0	0	0	0	0
Scer_15.498	Spar_15.471	YOR265W	RBL2	2	0	1	0	0	0	0	0	0	0	0
Scer_15.500	Spar_15.473	YOR267C	HRK1	30	23	40	4	1	0	0	0	0	0	0
Scer_15.504	Spar_15.477	YOR271C	FSF1	3	0	2	0	0	0	0	0	0	0	0
Scer_15.505	Spar_15.478	YOR272W	YTM1	4	2	2	0	0	0	0	0	0	0	0
Scer_15.508	Spar_15.481	YOR275C	RIM20	1	0	0	0	0	0	0	0	0	0	0
Scer_15.509	Spar_15.482	YOR276W	CAF20	0	1	7	10	0	1	0	0	0	0	0
Scer_15.524	Spar_15.499	YOR291W	YPK9	3	4	0	0	0	0	0	0	0	0	0
Scer_15.528	Spar_15.502	YOR294W	RRS1	0	0	3	0	0	0	0	0	0	0	0
Scer_15.531	Spar_15.505	YOR297C	TIM18	5	3	2	0	0	0	0	0	0	0	0
Scer_15.544	Spar_15.517	YOR307C	SLY41	2	15	6	0	0	0	0	0	0	0	0
Scer_15.545	Spar_15.518	YOR308C	SNU66	0	5	0	0	0	0	0	0	0	0	0
Scer_15.55	Spar_15.45	YOL125W	TRM13	6	8	8	16	1	1	1	0	0	0	0
Scer_15.553	Spar_15.528	YOR315W	SFG1	10	0	21	8	0	1	0	0	0	0	0
Scer_15.559	Spar_15.534	YOR320C	GNT1	3	21	5	0	0	0	0	0	0	0	0
Scer_15.561	Spar_15.536	YOR322C	LDB19	0	11	0	13	0	0	0	0	0	0	0
Scer_15.57	Spar_15.47	YOL123W	HRP1	51	100	59	92	1	1	1	0	0	0	0
Scer_15.570	Spar_15.545	YOR332W	VMA4	3	9	0	14	0	0	0	0	0	0	0
Scer_15.572	Spar_15.547	YOR335C	ALA1	39	41	18	30	1	1	1	0	0	0	0
Scer_15.589	Spar_15.562	YOR344C	TYE7	7	2	0	6	0	0	0	0	0	0	0
Scer_15.599	Spar_15.569	YOR350C	MNE1	1	3	4	8	0	0	0	0	0	0	0
Scer_15.601	Spar_15.571	YOR352W	TFB6	0	1	0	1	0	0	0	0	0	0	0
Scer_15.602	Spar_15.572	YOR353C	SOG2	0	0	0	2	0	0	0	0	0	0	0
Scer_15.605	Spar_15.575	YOR356W	CIR2	1	0	1	0	0	0	0	0	0	0	0
Scer_15.609	Spar_15.579	YOR360C	PDE2	34	60	68	70	1	1	1	0	0	0	0
Scer_15.611	Spar_15.581	YOR362C	PRE10	0	0	0	3	0	0	0	0	0	0	0
Scer_15.616	Spar_15.588	YOR369C	RPS12	12	176	1	46	1	0	0	0	0	0	0
Scer_15.617	Spar_15.589	YOR370C	MRS6	1	17	3	0	0	0	0	0	0	0	0
Scer_15.64	Spar_15.54	YOL116W	MSN1	0	6	4	23	0	0	0	0	0	0	0
Scer_15.68	Spar_15.58	YOL112W	MSB4	0	0	6	3	0	0	0	0	0	0	0
Scer_15.77	Spar_15.71	YOL105C	WSC3	8	2	0	10	0	0	0	0	0	0	0
Scer_15.89	Spar_15.76	YOL100W	PKH2	9	30	3	3	1	0	0	0	0	0	0
Scer_15.90	Spar_15.77	YOL098C	NA	3	20	2	21	0	0	0	0	0	0	0
Scer_15.93	Spar_15.80	YOL096C	COQ3	2	0	0	0	0	0	0	0	0	0	0
Scer_16.100	Spar_16.119	YPL204W	HRR25	16	24	7	3	1	0	0	0	0	0	0
Scer_16.101	Spar_16.120	YPL203W	TPK2	10	7	3	6	1	0	0	0	0	0	0
Scer_16.107	Spar_16.126	YPL196W	OXR1	0	0	0	10	0	0	0	0	0	0	0
Scer_16.109	Spar_16.128	YPL194W	DDC1	0	0	0	3	0	0	0	0	0	0	0
Scer_16.110	Spar_16.129	YPL193W	RSA1	3	0	6	0	0	0	0	0	0	0	0
Scer_16.113	Spar_16.132	YPL190C	NAB3	18	15	28	39	1	1	1	0	0	0	0
Scer_16.120	Spar_16.139	YPL184C	MRN1	0	13	17	0	0	0	0	0	0	0	0
Scer_16.123	Spar_16.143	YPL181W	CTI6	2	9	2	2	0	0	0	0	0	0	0
Scer_16.125	Spar_16.145	YPL179W	PPQ1	85	51	48	26	1	1	1	0	0	0	0
Scer_16.131	Spar_16.150	YPL177C	CUP9	54	55	24	27	1	1	1	0	0	0	0
Scer_16.134	Spar_16.153	YPL174C	NIP100	7	3	4	0	0	0	0	0	0	0	0
Scer_16.135	Spar_16.154	YPL173W	MRPL40	2	0	1	0	0	0	0	0	0	0	0
Scer_16.138	Spar_16.157	YPL170W	DAP1	1	10	0	1	0	0	0	0	0	0	0
Scer_16.148	Spar_16.167	YPL160W	CDC60	3	0	0	0	0	0	0	0	0	0	0
Scer_16.152	Spar_16.171	YPL156C	PRM4	0	0	0	10	0	0	0	0	0	0	0
Scer_16.154	Spar_16.173	YPL154C	PEP4	68	13	11	34	1	1	1	0	0	0	0
Scer_16.158	Spar_16.176	YPL151C	PRP46	2	0	3	0	0	0	0	0	0	0	0
Scer_16.160	Spar_16.178	YPL149W	ATG5	8	1	0	0	0	0	0	0	0	0	0
Scer_16.161	Spar_16.179	YPL148C	PPT2	4	0	2	0	0	0	0	0	0	0	0
Scer_16.164	Spar_16.182	YPL145C	KES1	26	75	61	8	1	1	1	0	0	0	0
Scer_16.168	Spar_16.186	YPL140C	MKK2	23	32	13	2	1	0	0	0	0	0	0
Scer_16.172	Spar_16.190	YPL135W	ISU1	0	1	5	8	0	1	0	0	0	0	0
Scer_16.175	Spar_16.193	YPL132W	COX11	2	1	0	0	0	0	0	0	0	0	0
Scer_16.178	Spar_16.196	YPL129W	TAF14	2	0	0	0	0	0	0	0	0	0	0
Scer_16.190	Spar_16.207	YPL118W	MRP51	0	7	3	10	0	0	0	0	0	0	0
Scer_16.191	Spar_16.208	YPL117C	IDI1	2	23	6	1	0	0	0	0	0	0	0
Scer_16.193	Spar_16.210	YPL115C	BEM3	24	13	32	9	1	1	1	0	0	0	0
Scer_16.197	Spar_16.214	YPL111W	CAR1	17	20	0	5	1	0	0	0	0	0	0
Scer_16.207	Spar_16.225	YPL103C	FMP30	0	0	0	13	0	0	0	0	0	0	0
Scer_16.216	Spar_16.233	YPL095C	EEB1	0	0	1	0	0	0	0	0	0	0	0
Scer_16.218	Spar_16.235	YPL093W	NOG1	5	23	0	0	1	0	0	1	0	0	0
Scer_16.220	Spar_16.237	YPL091W	GLR1	7	0	0	0	0	0	0	0	0	0	0
Scer_16.224	Spar_16.241	YPL087W	YDC1	0	2	0	3	0	0	0	0	0	0	0
Scer_16.226	Spar_16.243	YPL085W	SEC16	0	4	4	0	0	0	0	0	0	0	0
Scer_16.228	Spar_16.245	YPL083C	SEN54	10	6	0	0	1	0	0	1	0	0	0
Scer_16.233	Spar_16.251	YPL078C	ATP4	2	2	6	1	0	0	0	0	0	0	0
Scer_16.235	Spar_16.253	YPL076W	GPI2	1	1	29	6	0	1	0	0	0	0	0
Scer_16.239	Spar_16.258	YPL071C	NA	10	2	2	0	0	0	0	0	0	0	0
Scer_16.240	Spar_16.259	YPL070W	MUK1	2	11	1	0	0	0	0	0	0	0	0
Scer_16.247	Spar_16.266	YPL063W	TIM50	4	3	8	12	0	1	0	0	0	0	0
Scer_16.249	Spar_16.268	YPL061W	ALD6	0	6	0	13	0	0	0	0	0	0	0
Scer_16.26	Spar_16.46	YPL266W	DIM1	0	0	0	2	0	0	0	0	0	0	0
Scer_16.266	Spar_16.282	YPL053C	KTR6	1	1	0	0	0	0	0	0	0	0	0
Scer_16.269	Spar_16.285	YPL050C	MNN9	5	15	5	0	1	0	0	0	0	0	0
Scer_16.27	Spar_16.47	YPL265W	DIP5	62	75	83	64	1	1	1	0	0	0	0
Scer_16.271	Spar_16.287	YPL048W	CAM1	1	7	2	0	0	0	0	0	0	0	0
Scer_16.276	Spar_16.292	YPL042C	SSN3	1	0	1	0	0	0	0	0	0	0	0
Scer_16.287	Spar_16.303	YPL032C	SVL3	70	81	118	164	1	1	1	0	0	0	0
Scer_16.289	Spar_16.305	YPL030W	TRM44	0	15	3	0	0	0	0	0	0	0	0
Scer_16.290	Spar_16.306	YPL029W	SUV3	1	0	0	0	0	0	0	0	0	0	0
Scer_16.291	Spar_16.307	YPL028W	ERG10	8	5	0	0	1	0	0	1	0	0	0
Scer_16.295	Spar_16.313	YPL024W	RMI1	94	298	15	11	1	1	1	0	0	0	0
Scer_16.296	Spar_16.314	YPL023C	MET12	25	23	9	1	1	0	0	0	0	0	0
Scer_16.30	Spar_16.50	YPL262W	FUM1	0	0	4	0	0	0	0	0	0	0	0
Scer_16.303	Spar_16.322	YPL016W	SWI1	15	25	19	24	1	1	1	0	0	0	0
Scer_16.304	Spar_16.323	YPL015C	HST2	0	0	1	0	0	0	0	0	0	0	0
Scer_16.307	Spar_16.326	YPL012W	RRP12	11	13	6	3	1	0	0	0	0	0	0
Scer_16.309	Spar_16.328	YPL010W	RET3	1	2	0	2	0	0	0	0	0	0	0
Scer_16.311	Spar_16.330	YPL008W	CHL1	6	0	4	0	0	0	0	0	0	0	0
Scer_16.315	Spar_16.334	YPL004C	LSP1	0	2	3	2	0	0	0	0	0	0	0
Scer_16.316	Spar_16.335	YPL003W	ULA1	0	0	5	0	0	0	0	0	0	0	0
Scer_16.339	Spar_16.359	YPR013C	CMR3	1	0	2	7	0	0	0	0	0	0	0
Scer_16.348	Spar_16.368	YPR021C	AGC1	15	5	1	0	1	0	0	0	0	0	0
Scer_16.350	Spar_16.370	YPR023C	EAF3	1	0	1	0	0	0	0	0	0	0	0
Scer_16.351	Spar_16.371	YPR024W	YME1	3	6	6	6	0	1	0	0	0	0	0
Scer_16.353	Spar_16.373	YPR026W	ATH1	1	4	0	0	0	0	0	0	0	0	0
Scer_16.356	Spar_16.377	YPR028W	YOP1	0	9	0	4	0	0	0	0	0	0	0
Scer_16.362	Spar_16.383	YPR034W	ARP7	1	0	0	0	0	0	0	0	0	0	0
Scer_16.363	Spar_16.384	YPR035W	GLN1	1	10	0	5	0	0	0	0	0	0	0
Scer_16.364	Spar_16.385	YPR036W	VMA13	0	0	3	0	0	0	0	0	0	0	0
Scer_16.369	Spar_16.390	YPR041W	TIF5	33	23	41	94	1	1	1	0	0	0	0
Scer_16.377	Spar_16.398	YPR051W	MAK3	0	5	0	0	0	0	0	0	0	0	0
Scer_16.386	Spar_16.406	YPR060C	ARO7	4	0	4	5	0	0	0	0	0	0	0
Scer_16.393	Spar_16.413	YPR067W	ISA2	8	10	1	0	1	0	0	0	0	0	0
Scer_16.395	Spar_16.415	YPR069C	SPE3	0	0	1	2	0	0	0	0	0	0	0
Scer_16.400	Spar_16.429	YPR072W	NOT5	40	24	9	12	1	1	1	0	0	0	0
Scer_16.401	Spar_16.430	YPR073C	LTP1	0	1	0	0	0	0	0	0	0	0	0
Scer_16.412	Spar_16.441	YPR085C	ASA1	18	31	2	5	1	0	0	0	0	0	0
Scer_16.419	Spar_16.448	YPR094W	RDS3	3	0	0	5	0	0	0	0	0	0	0
Scer_16.427	Spar_16.456	YPR103W	PRE2	0	12	4	6	0	0	0	0	0	0	0
Scer_16.429	Spar_16.458	YPR105C	COG4	2	0	0	0	0	0	0	0	0	0	0
Scer_16.432	Spar_16.461	YPR108W	RPN7	47	27	12	5	1	1	1	0	0	0	0
Scer_16.434	Spar_16.463	YPR109W	NA	52	62	0	0	1	0	0	1	0	0	0
Scer_16.439	Spar_16.468	YPR114W	NA	0	0	0	10	0	0	0	0	0	0	0
Scer_16.442	Spar_16.471	YPR117W	NA	2	0	0	0	0	0	0	0	0	0	0
Scer_16.443	Spar_16.472	YPR118W	MRI1	5	1	0	0	0	0	0	0	0	0	0
Scer_16.455	Spar_16.491	YPR127W	NA	0	0	3	0	0	0	0	0	0	0	0
Scer_16.460	Spar_16.496	YPR133C	SPN1	1	1	1	3	0	0	0	0	0	0	0
Scer_16.462	Spar_16.498	YPR134W	MSS18	1	0	0	0	0	0	0	0	0	0	0
Scer_16.480	Spar_16.507	YPR140W	TAZ1	0	0	0	1	0	0	0	0	0	0	0
Scer_16.49	Spar_16.67	YPL256C	CLN2	5	6	2	25	1	0	0	0	0	0	0
Scer_16.490	Spar_16.518	YPR149W	NCE102	6	18	15	58	1	1	1	0	0	0	0
Scer_16.491	Spar_16.519	YPR151C	SUE1	0	0	0	2	0	0	0	0	0	0	0
Scer_16.498	Spar_16.526	YPR158W	CUR1	0	0	0	4	0	0	0	0	0	0	0
Scer_16.51	Spar_16.69	YPL254W	HFI1	22	24	9	4	1	0	0	0	0	0	0
Scer_16.522	Spar_16.537	YPR166C	MRP2	0	0	5	0	0	0	0	0	0	0	0
Scer_16.54	Spar_16.72	YPL250C	ICY2	0	0	1	0	0	0	0	0	0	0	0
Scer_16.540	Spar_16.558	YPR183W	DPM1	0	0	0	9	0	0	0	0	0	0	0
Scer_16.548	Spar_16.566	YPR191W	QCR2	1	0	25	30	0	1	0	0	0	0	0
Scer_16.56	Spar_16.75	YPL249C	GYP5	0	6	0	0	0	0	0	0	0	0	0
Scer_16.59	Spar_16.78	YPL246C	RBD2	6	9	0	0	1	0	0	1	0	0	0
Scer_16.63	Spar_16.82	YPL242C	IQG1	7	0	10	14	0	1	0	0	0	0	0
Scer_16.69	Spar_16.88	YPL235W	RVB2	3	0	5	5	0	1	0	0	0	0	0
Scer_16.72	Spar_16.91	YPL232W	SSO1	25	4	26	18	0	1	0	0	0	0	0
Scer_16.73	Spar_16.92	YPL231W	FAS2	1	0	0	0	0	0	0	0	0	0	0
Scer_16.75	Spar_16.94	YPL229W	NA	0	0	2	0	0	0	0	0	0	0	0
Scer_16.76	Spar_16.95	YPL228W	CET1	2	0	9	13	0	1	0	0	0	0	0
Scer_16.78	Spar_16.97	YPL226W	NEW1	0	0	2	0	0	0	0	0	0	0	0
Scer_16.87	Spar_16.106	YPL217C	BMS1	0	0	0	1	0	0	0	0	0	0	0
Scer_16.93	Spar_16.112	YPL211W	NIP7	2	7	0	6	0	0	0	0	0	0	0
Scer_16.94	Spar_16.113	YPL210C	SRP72	3	13	0	5	0	0	0	0	0	0	0
Scer_2.109	Spar_2.87	YBL032W	HEK2	2	0	6	21	0	1	0	0	0	0	0
Scer_2.111	Spar_2.89	YBL030C	PET9	25	49	91	146	1	1	1	0	0	0	0
Scer_2.114	Spar_2.92	YBL028C	NA	0	0	0	1	0	0	0	0	0	0	0
Scer_2.120	Spar_2.98	YBL023C	MCM2	2	0	0	0	0	0	0	0	0	0	0
Scer_2.121	Spar_2.99	YBL022C	PIM1	13	9	17	3	1	0	0	0	0	0	0
Scer_2.123	Spar_2.102	YBL020W	RFT1	6	17	12	13	1	1	1	0	0	0	0
Scer_2.127	Spar_2.106	YBL016W	FUS3	0	1	0	0	0	0	0	0	0	0	0
Scer_2.152	Spar_2.134	YBL004W	UTP20	14	4	0	0	0	0	0	0	0	0	0
Scer_2.154	Spar_2.136	YBL002W	HTB2	19	28	0	0	1	0	0	1	0	0	0
Scer_2.155	Spar_2.137	YBL001C	ECM15	5	6	4	1	1	0	0	0	0	0	0
Scer_2.161	Spar_2.143	YBR006W	UGA2	1	0	1	7	0	0	0	0	0	0	0
Scer_2.191	Spar_2.164	YBR023C	CHS3	2	0	6	27	0	1	0	0	0	0	0
Scer_2.192	Spar_2.165	YBR024W	SCO2	1	0	0	0	0	0	0	0	0	0	0
Scer_2.198	Spar_2.172	YBR030W	RKM3	0	0	0	8	0	0	0	0	0	0	0
Scer_2.204	Spar_2.178	YBR036C	CSG2	0	5	0	0	0	0	0	0	0	0	0
Scer_2.211	Spar_2.185	YBR043C	QDR3	5	0	24	15	0	1	0	0	0	0	0
Scer_2.223	Spar_2.200	YBR052C	RFS1	2	0	6	2	0	0	0	0	0	0	0
Scer_2.225	Spar_2.202	YBR054W	YRO2	2	0	1	0	0	0	0	0	0	0	0
Scer_2.228	Spar_2.205	YBR056W	NA	1	5	0	0	0	0	0	0	0	0	0
Scer_2.23	Spar_2.14	YBL107C	MIC23	0	0	2	0	0	0	0	0	0	0	0
Scer_2.231	Spar_2.210	YBR057C	MUM2	0	0	1	0	0	0	0	0	0	0	0
Scer_2.232	Spar_2.211	YBR058C	UBP14	0	0	4	0	0	0	0	0	0	0	0
Scer_2.234	Spar_2.213	YBR059C	AKL1	0	0	0	11	0	0	0	0	0	0	0
Scer_2.238	Spar_2.217	YBR061C	TRM7	0	2	0	0	0	0	0	0	0	0	0
Scer_2.242	Spar_2.221	YBR066C	NRG2	7	24	0	0	1	0	0	1	0	0	0
Scer_2.247	Spar_2.226	YBR071W	NA	0	0	12	7	0	1	0	0	1	0	0
Scer_2.248	Spar_2.227	YBR072W	HSP26	0	8	0	0	0	0	0	0	0	0	0
Scer_2.260	Spar_2.236	YBR081C	SPT7	0	0	0	10	0	0	0	0	0	0	0
Scer_2.263	Spar_2.239	YBR082C	UBC4	17	32	46	21	1	1	1	0	0	0	0
Scer_2.264	Spar_2.240	YBR083W	TEC1	0	7	0	0	0	0	0	0	0	0	0
Scer_2.269	Spar_2.245	YBR086C	IST2	24	18	89	75	1	1	1	0	0	0	0
Scer_2.277	Spar_2.253	YBR094W	PBY1	0	7	0	0	0	0	0	0	0	0	0
Scer_2.28	Spar_2.20	YBL102W	SFT2	0	9	0	0	0	0	0	0	0	0	0
Scer_2.287	Spar_2.263	YBR105C	VID24	0	0	1	0	0	0	0	0	0	0	0
Scer_2.288	Spar_2.264	YBR106W	PHO88	7	29	3	22	1	0	0	0	0	0	0
Scer_2.289	Spar_2.265	YBR107C	IML3	0	0	1	0	0	0	0	0	0	0	0
Scer_2.29	Spar_2.21	YBL101C	ECM21	0	1	0	0	0	0	0	0	0	0	0
Scer_2.291	Spar_2.267	YBR109C	CMD1	0	1	0	0	0	0	0	0	0	0	0
Scer_2.303	Spar_2.278	YBR120C	CBP6	1	5	9	2	0	0	0	0	0	0	0
Scer_2.307	Spar_2.282	YBR125C	PTC4	17	39	5	21	1	1	1	0	0	0	0
Scer_2.310	Spar_2.285	YBR127C	VMA2	0	0	4	3	0	0	0	0	0	0	0
Scer_2.311	Spar_2.286	YBR128C	ATG14	0	0	2	0	0	0	0	0	0	0	0
Scer_2.314	Spar_2.289	YBR131W	CCZ1	4	0	13	13	0	1	0	0	0	0	0
Scer_2.315	Spar_2.290	YBR132C	AGP2	4	2	11	0	0	0	0	0	0	0	0
Scer_2.318	Spar_2.293	YBR135W	CKS1	19	23	7	18	1	1	1	0	0	0	0
Scer_2.329	Spar_2.306	YBR146W	MRPS9	3	13	2	0	0	0	0	0	0	0	0
Scer_2.334	Spar_2.311	YBR151W	APD1	0	8	0	0	0	0	0	0	0	0	0
Scer_2.337	Spar_2.314	YBR154C	RPB5	24	62	3	2	1	0	0	0	0	0	0
Scer_2.338	Spar_2.315	YBR155W	CNS1	1	0	0	6	0	0	0	0	0	0	0
Scer_2.341	Spar_2.318	YBR158W	AMN1	0	0	0	21	0	0	0	0	0	0	0
Scer_2.350	Spar_2.326	YBR165W	UBS1	0	0	5	0	0	0	0	0	0	0	0
Scer_2.352	Spar_2.328	YBR167C	POP7	0	0	0	2	0	0	0	0	0	0	0
Scer_2.356	Spar_2.332	YBR171W	SEC66	6	0	0	0	0	0	0	0	0	0	0
Scer_2.357	Spar_2.333	YBR172C	SMY2	3	0	5	31	0	1	0	0	0	0	0
Scer_2.360	Spar_2.336	YBR176W	ECM31	1	12	1	5	0	0	0	0	0	0	0
Scer_2.373	Spar_2.353	YBR187W	GDT1	3	0	3	10	0	0	0	0	0	0	0
Scer_2.379	Spar_2.359	YBR192W	RIM2	18	3	20	11	0	1	0	0	0	0	0
Scer_2.381	Spar_2.361	YBR194W	AIM4	2	0	10	5	0	1	0	0	0	0	0
Scer_2.391	Spar_2.369	YBR201W	DER1	0	0	9	1	0	0	0	0	0	0	0
Scer_2.395	Spar_2.373	YBR204C	LDH1	2	0	0	0	0	0	0	0	0	0	0
Scer_2.407	Spar_2.386	YBR211C	AME1	16	35	0	0	1	0	0	1	0	0	0
Scer_2.410	Spar_2.390	YBR214W	SDS24	0	0	2	0	0	0	0	0	0	0	0
Scer_2.413	Spar_2.393	YBR217W	ATG12	19	35	27	30	1	1	1	0	0	0	0
Scer_2.416	Spar_2.395	YBR220C	NA	0	0	0	1	0	0	0	0	0	0	0
Scer_2.43	Spar_2.26	YBL099W	ATP1	429	321	277	145	1	1	1	0	0	0	0
Scer_2.437	Spar_2.415	YBR239C	ERT1	3	0	0	3	0	0	0	0	0	0	0
Scer_2.440	Spar_2.418	YBR242W	NA	19	28	201	186	1	1	1	0	0	0	0
Scer_2.447	Spar_2.426	YBR249C	ARO4	10	18	10	2	1	0	0	0	0	0	0
Scer_2.449	Spar_2.428	YBR251W	MRPS5	0	0	0	1	0	0	0	0	0	0	0
Scer_2.458	Spar_2.437	YBR259W	NA	1	0	1	15	0	0	0	0	0	0	0
Scer_2.474	Spar_2.453	YBR276C	PPS1	0	0	0	4	0	0	0	0	0	0	0
Scer_2.477	Spar_2.456	YBR280C	SAF1	5	0	0	0	0	0	0	0	0	0	0
Scer_2.480	Spar_2.459	YBR283C	SSH1	176	47	85	55	1	1	1	0	0	0	0
Scer_2.487	Spar_2.466	YBR290W	BSD2	0	0	6	0	0	0	0	0	0	0	0
Scer_2.491	Spar_2.468	YBR293W	VBA2	0	0	0	1	0	0	0	0	0	0	0
Scer_2.59	Spar_2.42	YBL081W	NA	5	2	4	2	0	0	0	0	0	0	0
Scer_2.71	Spar_2.54	YBL069W	AST1	3	0	1	0	0	0	0	0	0	0	0
Scer_2.72	Spar_2.55	YBL068W	PRS4	20	35	0	4	1	0	0	0	0	0	0
Scer_2.73	Spar_2.56	YBL067C	UBP13	16	46	22	19	1	1	1	0	0	0	0
Scer_2.78	Spar_2.61	YBL061C	SKT5	0	0	5	12	0	1	0	0	1	0	0
Scer_2.79	Spar_2.62	YBL060W	YEL1	0	0	1	4	0	0	0	0	0	0	0
Scer_2.84	Spar_2.67	YBL056W	PTC3	1	0	0	12	0	0	0	0	0	0	0
Scer_2.90	Spar_2.73	YBL049W	MOH1	1	0	0	0	0	0	0	0	0	0	0
Scer_2.92	Spar_2.76	YBL047C	EDE1	28	32	0	0	1	0	0	1	0	0	0
Scer_2.94	Spar_2.78	YBL045C	COR1	60	28	66	57	1	1	1	0	0	0	0
Scer_3.104	Spar_3.94	YCR008W	41459	3	0	22	22	0	1	0	0	0	0	0
Scer_3.110	Spar_3.100	YCR015C	NA	20	26	42	7	1	1	1	0	0	0	0
Scer_3.130	Spar_3.123	YCR023C	NA	7	15	2	0	1	0	0	0	0	0	0
Scer_3.137	Spar_3.129	YCR027C	RHB1	6	2	16	25	0	1	0	0	0	0	0
Scer_3.144	Spar_3.134	YCR028C	FEN2	0	1	1	0	0	0	0	0	0	0	0
Scer_3.145	Spar_3.135	YCR028C-A	RIM1	0	10	0	0	0	0	0	0	0	0	0
Scer_3.149	Spar_3.139	YCR033W	SNT1	2	0	6	14	0	1	0	0	0	0	0
Scer_3.159	Spar_3.149	YCR043C	NA	0	0	2	1	0	0	0	0	0	0	0
Scer_3.163	Spar_3.153	YCR047C	BUD23	1	0	0	1	0	0	0	0	0	0	0
Scer_3.168	Spar_3.158	YCR054C	CTR86	0	0	0	1	0	0	0	0	0	0	0
Scer_3.180	Spar_3.173	YCR069W	CPR4	8	10	1	10	1	0	0	0	0	0	0
Scer_3.181	Spar_3.174	YCR071C	IMG2	0	0	7	0	0	0	0	0	0	0	0
Scer_3.189	Spar_3.182	YCR079W	PTC6	0	0	0	11	0	0	0	0	0	0	0
Scer_3.191	Spar_3.184	YCR082W	AHC2	0	0	5	0	0	0	0	0	0	0	0
Scer_3.193	Spar_3.186	YCR084C	TUP1	62	22	39	38	1	1	1	0	0	0	0
Scer_3.202	Spar_3.196	YCR093W	CDC39	0	8	0	0	0	0	0	0	0	0	0
Scer_3.21	Spar_3.27	YCL056C	PEX34	0	0	0	1	0	0	0	0	0	0	0
Scer_3.26	Spar_3.32	YCL050C	APA1	2	1	0	5	0	0	0	0	0	0	0
Scer_3.32	Spar_3.37	YCL045C	EMC1	0	0	1	0	0	0	0	0	0	0	0
Scer_3.34	Spar_3.39	YCL043C	PDI1	3	11	3	0	0	0	0	0	0	0	0
Scer_3.77	Spar_3.64	YCL017C	NFS1	5	23	1	39	1	0	0	0	0	0	0
Scer_3.81	Spar_3.68	YCL011C	GBP2	0	1	0	6	0	0	0	0	0	0	0
Scer_3.89	Spar_3.76	YCL001W	RER1	0	12	3	2	0	0	0	0	0	0	0
Scer_3.95	Spar_3.83	YCR004C	YCP4	5	13	5	6	1	1	1	0	0	0	0
Scer_4.103	Spar_4.111	YDL155W	CLB3	3	4	4	14	0	0	0	0	0	0	0
Scer_4.108	Spar_4.117	YDL148C	NOP14	1	0	0	0	0	0	0	0	0	0	0
Scer_4.110	Spar_4.119	YDL146W	LDB17	48	2	8	0	0	0	0	0	0	0	0
Scer_4.119	Spar_4.141	YDL137W	ARF2	1	0	2	0	0	0	0	0	0	0	0
Scer_4.121	Spar_4.143	YDL135C	RDI1	3	0	5	5	0	1	0	0	0	0	0
Scer_4.124	Spar_4.146	YDL132W	CDC53	51	36	18	26	1	1	1	0	0	0	0
Scer_4.128	Spar_4.150	YDL129W	NA	8	0	4	0	0	0	0	0	0	0	0
Scer_4.129	Spar_4.151	YDL128W	VCX1	4	0	0	0	0	0	0	0	0	0	0
Scer_4.137	Spar_4.159	YDL120W	YFH1	3	0	2	0	0	0	0	0	0	0	0
Scer_4.139	Spar_4.161	YDL117W	CYK3	11	0	5	1	0	0	0	0	0	0	0
Scer_4.140	Spar_4.162	YDL116W	NUP84	1	0	3	0	0	0	0	0	0	0	0
Scer_4.145	Spar_4.168	YDL112W	TRM3	3	0	0	0	0	0	0	0	0	0	0
Scer_4.150	Spar_4.173	YDL107W	MSS2	0	0	1	0	0	0	0	0	0	0	0
Scer_4.158	Spar_4.181	YDL099W	BUG1	1	0	6	7	0	1	0	0	0	0	0
Scer_4.160	Spar_4.183	YDL097C	RPN6	2	13	0	0	0	0	0	0	0	0	0
Scer_4.163	Spar_4.186	YDL095W	PMT1	0	5	5	0	0	0	0	0	0	0	0
Scer_4.168	Spar_4.191	YDL088C	ASM4	0	3	3	1	0	0	0	0	0	0	0
Scer_4.180	Spar_4.203	YDL078C	MDH3	0	1	0	1	0	0	0	0	0	0	0
Scer_4.181	Spar_4.204	YDL077C	VAM6	0	0	3	26	0	0	0	0	0	0	0
Scer_4.184	Spar_4.207	YDL074C	BRE1	4	0	0	0	0	0	0	0	0	0	0
Scer_4.185	Spar_4.208	YDL073W	NA	3	0	0	0	0	0	0	0	0	0	0
Scer_4.194	Spar_4.217	YDL063C	SYO1	0	0	1	4	0	0	0	0	0	0	0
Scer_4.197	Spar_4.220	YDL059C	RAD59	2	0	0	0	0	0	0	0	0	0	0
Scer_4.201	Spar_4.224	YDL055C	PSA1	19	23	96	123	1	1	1	0	0	0	0
Scer_4.207	Spar_4.231	YDL049C	KNH1	1	7	7	1	0	0	0	0	0	0	0
Scer_4.209	Spar_4.233	YDL047W	SIT4	81	35	20	10	1	1	1	0	0	0	0
Scer_4.212	Spar_4.236	YDL045C	FAD1	8	1	1	0	0	0	0	0	0	0	0
Scer_4.222	Spar_4.248	YDL031W	DBP10	0	0	0	13	0	0	0	0	0	0	0
Scer_4.227	Spar_4.253	YDL025C	RTK1	16	4	5	2	0	0	0	0	0	0	0
Scer_4.236	Spar_4.261	YDL018C	ERP3	0	0	9	36	0	1	0	0	1	0	0
Scer_4.237	Spar_4.262	YDL017W	CDC7	0	3	7	0	0	0	0	0	0	0	0
Scer_4.239	Spar_4.264	YDL014W	NOP1	339	442	169	116	1	1	1	0	0	0	0
Scer_4.240	Spar_4.265	YDL013W	SLX5	0	0	5	0	0	0	0	0	0	0	0
Scer_4.25	Spar_4.31	YDL235C	YPD1	3	12	0	1	0	0	0	0	0	0	0
Scer_4.254	Spar_4.276	YDL006W	PTC1	11	20	20	28	1	1	1	0	0	0	0
Scer_4.26	Spar_4.32	YDL234C	GYP7	0	0	2	0	0	0	0	0	0	0	0
Scer_4.261	Spar_4.283	YDR002W	YRB1	0	25	0	3	0	0	0	0	0	0	0
Scer_4.266	Spar_4.288	YDR006C	SOK1	1	0	18	25	0	1	0	0	0	0	0
Scer_4.267	Spar_4.289	YDR007W	TRP1	0	0	0	10	0	0	0	0	0	0	0
Scer_4.280	Spar_4.302	YDR020C	DAS2	3	0	0	0	0	0	0	0	0	0	0
Scer_4.281	Spar_4.303	YDR021W	FAL1	1	0	0	0	0	0	0	0	0	0	0
Scer_4.290	Spar_4.316	YDR027C	VPS54	14	5	4	2	1	0	0	0	0	0	0
Scer_4.295	Spar_4.321	YDR032C	PST2	3	13	0	9	0	0	0	0	0	0	0
Scer_4.296	Spar_4.322	YDR033W	MRH1	94	115	43	39	1	1	1	0	0	0	0
Scer_4.297	Spar_4.323	YDR034C	LYS14	3	11	1	4	0	0	0	0	0	0	0
Scer_4.317	Spar_4.331	YDR035W	ARO3	13	10	0	0	1	0	0	1	0	0	0
Scer_4.325	Spar_4.344	YDR043C	NRG1	10	13	2	10	1	0	0	0	0	0	0
Scer_4.326	Spar_4.345	YDR044W	HEM13	0	0	5	1	0	0	0	0	0	0	0
Scer_4.335	Spar_4.353	YDR054C	CDC34	8	14	6	20	1	1	1	0	0	0	0
Scer_4.345	Spar_4.364	YDR062W	LCB2	0	5	15	41	0	1	0	0	0	0	0
Scer_4.346	Spar_4.365	YDR063W	AIM7	9	10	5	12	1	1	1	0	0	0	0
Scer_4.348	Spar_4.367	YDR065W	RRG1	0	0	6	0	0	0	0	0	0	0	0
Scer_4.350	Spar_4.369	YDR067C	OCA6	0	0	1	0	0	0	0	0	0	0	0
Scer_4.351	Spar_4.370	YDR068W	DOS2	0	0	0	1	0	0	0	0	0	0	0
Scer_4.352	Spar_4.371	YDR069C	DOA4	11	0	0	0	0	0	0	0	0	0	0
Scer_4.354	Spar_4.373	YDR071C	PAA1	5	10	0	5	1	0	0	0	0	0	0
Scer_4.355	Spar_4.374	YDR072C	IPT1	24	60	23	72	1	1	1	0	0	0	0
Scer_4.356	Spar_4.375	YDR073W	SNF11	62	108	10	45	1	1	1	0	0	0	0
Scer_4.357	Spar_4.376	YDR074W	TPS2	2	3	64	97	0	1	0	0	0	0	0
Scer_4.36	Spar_4.41	YDL224C	WHI4	3	8	4	32	0	0	0	0	0	0	0
Scer_4.361	Spar_4.381	YDR078C	SHU2	5	0	0	0	0	0	0	0	0	0	0
Scer_4.366	Spar_4.386	YDR082W	STN1	0	0	11	6	0	1	0	0	1	0	0
Scer_4.367	Spar_4.387	YDR083W	RRP8	0	1	0	0	0	0	0	0	0	0	0
Scer_4.369	Spar_4.389	YDR085C	AFR1	2	0	0	0	0	0	0	0	0	0	0
Scer_4.370	Spar_4.390	YDR086C	SSS1	238	302	267	189	1	1	1	0	0	0	0
Scer_4.372	Spar_4.392	YDR088C	SLU7	1	0	0	0	0	0	0	0	0	0	0
Scer_4.375	Spar_4.395	YDR090C	NA	8	12	0	0	1	0	0	1	0	0	0
Scer_4.376	Spar_4.396	YDR091C	RLI1	2	0	0	0	0	0	0	0	0	0	0
Scer_4.380	Spar_4.400	YDR096W	GIS1	0	0	1	0	0	0	0	0	0	0	0
Scer_4.381	Spar_4.401	YDR097C	MSH6	1	0	0	0	0	0	0	0	0	0	0
Scer_4.393	Spar_4.405	YDR099W	BMH2	52	54	4	15	1	0	0	0	0	0	0
Scer_4.395	Spar_4.407	YDR101C	ARX1	0	0	1	0	0	0	0	0	0	0	0
Scer_4.397	Spar_4.409	YDR103W	STE5	0	5	0	0	0	0	0	0	0	0	0
Scer_4.399	Spar_4.411	YDR105C	TMS1	2	0	3	0	0	0	0	0	0	0	0
Scer_4.413	Spar_4.427	YDR119W	VBA4	1	7	0	2	0	0	0	0	0	0	0
Scer_4.418	Spar_4.432	YDR123C	INO2	2	0	6	0	0	0	0	0	0	0	0
Scer_4.42	Spar_4.47	YDL217C	TIM22	6	1	11	14	0	1	0	0	0	0	0
Scer_4.437	Spar_4.449	YDR142C	PEX7	1	0	0	0	0	0	0	0	0	0	0
Scer_4.439	Spar_4.451	YDR144C	MKC7	1	1	3	4	0	0	0	0	0	0	0
Scer_4.443	Spar_4.456	YDR148C	KGD2	36	11	4	24	1	0	0	0	0	0	0
Scer_4.449	Spar_4.462	YDR155C	CPR1	35	82	46	20	1	1	1	0	0	0	0
Scer_4.450	Spar_4.463	YDR156W	RPA14	0	5	0	0	0	0	0	0	0	0	0
Scer_4.458	Spar_4.471	YDR164C	SEC1	29	29	2	0	1	0	0	0	0	0	0
Scer_4.459	Spar_4.472	YDR165W	TRM82	1	6	0	0	0	0	0	0	0	0	0
Scer_4.463	Spar_4.476	YDR169C	STB3	9	8	21	19	1	1	1	0	0	0	0
Scer_4.47	Spar_4.52	YDL212W	SHR3	0	1	0	0	0	0	0	0	0	0	0
Scer_4.475	Spar_4.484	YDR172W	SUP35	0	14	0	0	0	0	0	0	0	0	0
Scer_4.479	Spar_4.488	YDR176W	NGG1	0	15	0	0	0	0	0	0	0	0	0
Scer_4.480	Spar_4.489	YDR177W	UBC1	0	11	0	1	0	0	0	0	0	0	0
Scer_4.481	Spar_4.490	YDR178W	SDH4	41	48	103	35	1	1	1	0	0	0	0
Scer_4.482	Spar_4.491	YDR179C	CSN9	12	3	9	0	0	0	0	0	0	0	0
Scer_4.488	Spar_4.496	YDR183W	PLP1	0	4	0	0	0	0	0	0	0	0	0
Scer_4.495	Spar_4.504	YDR190C	RVB1	0	11	0	0	0	0	0	0	0	0	0
Scer_4.498	Spar_4.508	YDR194C	MSS116	0	9	0	0	0	0	0	0	0	0	0
Scer_4.509	Spar_4.518	YDR206W	EBS1	10	0	2	2	0	0	0	0	0	0	0
Scer_4.52	Spar_4.57	YDL208W	NHP2	1	3	0	0	0	0	0	0	0	0	0
Scer_4.530	Spar_4.525	YDR211W	GCD6	0	0	4	0	0	0	0	0	0	0	0
Scer_4.531	Spar_4.526	YDR212W	TCP1	2	4	3	0	0	0	0	0	0	0	0
Scer_4.533	Spar_4.528	YDR214W	AHA1	11	8	1	6	1	0	0	0	0	0	0
Scer_4.535	Spar_4.530	YDR216W	ADR1	0	11	0	0	0	0	0	0	0	0	0
Scer_4.545	Spar_4.540	YDR226W	ADK1	2	13	3	18	0	0	0	0	0	0	0
Scer_4.547	Spar_4.542	YDR228C	PCF11	0	2	1	0	0	0	0	0	0	0	0
Scer_4.55	Spar_4.60	YDL205C	HEM3	9	15	26	13	1	1	1	0	0	0	0
Scer_4.550	Spar_4.545	YDR232W	HEM1	24	26	63	55	1	1	1	0	0	0	0
Scer_4.555	Spar_4.551	YDR237W	MRPL7	11	2	31	1	0	0	0	0	0	0	0
Scer_4.556	Spar_4.552	YDR238C	SEC26	3	0	2	3	0	0	0	0	0	0	0
Scer_4.56	Spar_4.61	YDL204W	RTN2	0	1	0	2	0	0	0	0	0	0	0
Scer_4.562	Spar_4.556	YDR242W	AMD2	0	8	0	0	0	0	0	0	0	0	0
Scer_4.565	Spar_4.559	YDR245W	MNN10	0	3	0	0	0	0	0	0	0	0	0
Scer_4.568	Spar_4.561	YDR247W	VHS1	2	0	3	1	0	0	0	0	0	0	0
Scer_4.569	Spar_4.562	YDR248C	NA	0	0	15	23	0	1	0	0	1	0	0
Scer_4.57	Spar_4.62	YDL203C	ACK1	0	0	2	3	0	0	0	0	0	0	0
Scer_4.570	Spar_4.563	YDR249C	NA	0	0	1	0	0	0	0	0	0	0	0
Scer_4.572	Spar_4.565	YDR251W	PAM1	35	28	27	55	1	1	1	0	0	0	0
Scer_4.574	Spar_4.567	YDR253C	MET32	1	0	0	0	0	0	0	0	0	0	0
Scer_4.603	Spar_4.641	YDR265W	PEX10	5	0	2	0	0	0	0	0	0	0	0
Scer_4.604	Spar_4.642	YDR266C	HEL2	9	2	40	10	0	1	0	0	0	0	0
Scer_4.606	Spar_4.644	YDR268W	MSW1	0	15	0	0	0	0	0	0	0	0	0
Scer_4.608	Spar_4.646	YDR272W	GLO2	0	13	0	0	0	0	0	0	0	0	0
Scer_4.609	Spar_4.647	YDR273W	DON1	0	0	4	7	0	0	0	0	0	0	0
Scer_4.611	Spar_4.649	YDR275W	BSC2	0	0	1	4	0	0	0	0	0	0	0
Scer_4.617	Spar_4.657	YDR281C	PHM6	0	0	3	5	0	0	0	0	0	0	0
Scer_4.62	Spar_4.67	YDL198C	GGC1	35	9	77	59	1	1	1	0	0	0	0
Scer_4.620	Spar_4.660	YDR284C	DPP1	31	26	8	19	1	1	1	0	0	0	0
Scer_4.628	Spar_4.668	YDR292C	SRP101	3	0	4	13	0	0	0	0	0	0	0
Scer_4.634	Spar_4.674	YDR298C	ATP5	36	11	32	33	1	1	1	0	0	0	0
Scer_4.638	Spar_4.678	YDR302W	GPI11	1	0	0	0	0	0	0	0	0	0	0
Scer_4.639	Spar_4.679	YDR303C	RSC3	9	17	18	8	1	1	1	0	0	0	0
Scer_4.642	Spar_4.682	YDR306C	NA	3	0	5	10	0	1	0	0	0	0	0
Scer_4.644	Spar_4.684	YDR307W	PMT7	0	0	0	1	0	0	0	0	0	0	0
Scer_4.645	Spar_4.685	YDR308C	SRB7	5	0	3	0	0	0	0	0	0	0	0
Scer_4.646	Spar_4.686	YDR309C	GIC2	1	0	0	0	0	0	0	0	0	0	0
Scer_4.647	Spar_4.687	YDR310C	SUM1	14	34	4	0	1	0	0	0	0	0	0
Scer_4.650	Spar_4.690	YDR313C	PIB1	3	0	0	0	0	0	0	0	0	0	0
Scer_4.651	Spar_4.691	YDR314C	RAD34	0	12	0	0	0	0	0	0	0	0	0
Scer_4.665	Spar_4.698	YDR319C	YFT2	9	0	2	0	0	0	0	0	0	0	0
Scer_4.67	Spar_4.72	YDL193W	NUS1	22	13	29	39	1	1	1	0	0	0	0
Scer_4.674	Spar_4.706	YDR325W	YCG1	6	1	0	0	0	0	0	0	0	0	0
Scer_4.676	Spar_4.708	YDR328C	SKP1	0	6	0	0	0	0	0	0	0	0	0
Scer_4.677	Spar_4.709	YDR329C	PEX3	0	0	0	1	0	0	0	0	0	0	0
Scer_4.680	Spar_4.712	YDR332W	IRC3	0	0	0	4	0	0	0	0	0	0	0
Scer_4.683	Spar_4.715	YDR335W	MSN5	13	32	9	26	1	1	1	0	0	0	0
Scer_4.697	Spar_4.616	YDR346C	SVF1	8	28	20	18	1	1	1	0	0	0	0
Scer_4.699	Spar_4.614	YDR348C	PAL1	15	27	4	21	1	0	0	0	0	0	0
Scer_4.705	Spar_4.611	YDR350C	ATP22	8	0	0	0	0	0	0	0	0	0	0
Scer_4.706	Spar_4.610	YDR351W	SBE2	4	22	11	8	0	1	0	0	0	0	0
Scer_4.707	Spar_4.609	YDR352W	YPQ2	4	2	6	1	0	0	0	0	0	0	0
Scer_4.709	Spar_4.607	YDR354W	TRP4	2	1	0	0	0	0	0	0	0	0	0
Scer_4.71	Spar_4.76	YDL189W	RBS1	4	0	0	1	0	0	0	0	0	0	0
Scer_4.711	Spar_4.605	YDR357C	CNL1	0	0	2	0	0	0	0	0	0	0	0
Scer_4.714	Spar_4.602	YDR361C	BCP1	0	0	0	3	0	0	0	0	0	0	0
Scer_4.715	Spar_4.601	YDR362C	TFC6	0	1	4	0	0	0	0	0	0	0	0
Scer_4.716	Spar_4.600	YDR363W	ESC2	0	0	0	1	0	0	0	0	0	0	0
Scer_4.719	Spar_4.596	YDR364C	CDC40	4	0	0	0	0	0	0	0	0	0	0
Scer_4.720	Spar_4.595	YDR365C	ESF1	0	2	4	0	0	0	0	0	0	0	0
Scer_4.731	Spar_4.592	YDR368W	YPR1	0	0	2	0	0	0	0	0	0	0	0
Scer_4.735	Spar_4.588	YDR372C	VPS74	32	36	23	12	1	1	1	0	0	0	0
Scer_4.741	Spar_4.582	YDR377W	ATP17	6	1	1	3	0	0	0	0	0	0	0
Scer_4.745	Spar_4.578	YDR380W	ARO10	9	13	3	2	1	0	0	0	0	0	0
Scer_4.750	Spar_4.573	YDR384C	ATO3	0	0	21	1	0	0	0	0	0	0	0
Scer_4.753	Spar_4.738	YDR387C	NA	4	10	12	2	0	0	0	0	0	0	0
Scer_4.764	Spar_4.753	YDR398W	UTP5	0	0	5	5	0	1	0	0	1	0	0
Scer_4.765	Spar_4.754	YDR399W	HPT1	3	0	2	11	0	0	0	0	0	0	0
Scer_4.769	Spar_4.758	YDR404C	RPB7	34	42	14	31	1	1	1	0	0	0	0
Scer_4.770	Spar_4.759	YDR405W	MRP20	3	0	0	0	0	0	0	0	0	0	0
Scer_4.774	Spar_4.762	YDR408C	ADE8	2	0	2	6	0	0	0	0	0	0	0
Scer_4.778	Spar_4.766	YDR412W	RRP17	0	1	0	0	0	0	0	0	0	0	0
Scer_4.779	Spar_4.767	YDR414C	ERD1	7	0	1	0	0	0	0	0	0	0	0
Scer_4.780	Spar_4.768	YDR415C	NA	0	0	0	13	0	0	0	0	0	0	0
Scer_4.781	Spar_4.769	YDR416W	SYF1	0	0	0	4	0	0	0	0	0	0	0
Scer_4.787	Spar_4.791	YDR422C	SIP1	0	0	0	10	0	0	0	0	0	0	0
Scer_4.79	Spar_4.84	YDL180W	NA	6	6	0	0	1	0	0	1	0	0	0
Scer_4.797	Spar_4.801	YDR434W	GPI17	0	1	0	5	0	0	0	0	0	0	0
Scer_4.798	Spar_4.802	YDR435C	PPM1	4	0	0	0	0	0	0	0	0	0	0
Scer_4.801	Spar_4.805	YDR438W	THI74	0	15	0	0	0	0	0	0	0	0	0
Scer_4.803	Spar_4.808	YDR440W	DOT1	0	3	0	0	0	0	0	0	0	0	0
Scer_4.804	Spar_4.809	YDR441C	APT2	31	42	13	12	1	1	1	0	0	0	0
Scer_4.819	Spar_4.820	YDR451C	YHP1	0	5	14	9	0	1	0	0	0	0	0
Scer_4.82	Spar_4.87	YDL177C	NA	6	0	9	18	0	1	0	0	0	0	0
Scer_4.827	Spar_4.829	YDR460W	TFB3	3	1	8	1	0	0	0	0	0	0	0
Scer_4.830	Spar_4.832	YDR462W	MRPL28	0	0	4	0	0	0	0	0	0	0	0
Scer_4.834	Spar_4.836	YDR466W	PKH3	1	0	0	0	0	0	0	0	0	0	0
Scer_4.835	Spar_4.837	YDR468C	TLG1	2	8	6	5	0	1	0	0	0	0	0
Scer_4.846	Spar_4.848	YDR480W	DIG2	5	4	0	0	0	0	0	0	0	0	0
Scer_4.849	Spar_4.851	YDR483W	KRE2	7	0	4	0	0	0	0	0	0	0	0
Scer_4.856	Spar_4.858	YDR490C	PKH1	0	0	5	0	0	0	0	0	0	0	0
Scer_4.858	Spar_4.860	YDR492W	IZH1	41	50	29	27	1	1	1	0	0	0	0
Scer_4.859	Spar_4.861	YDR493W	MZM1	6	0	0	0	0	0	0	0	0	0	0
Scer_4.869	Spar_4.872	YDR503C	LPP1	0	0	0	9	0	0	0	0	0	0	0
Scer_4.87	Spar_4.92	YDL171C	GLT1	13	0	15	0	0	0	0	0	0	0	0
Scer_4.874	Spar_4.880	YDR507C	GIN4	37	43	5	0	1	0	0	0	0	0	0
Scer_4.876	Spar_4.882	YDR510W	SMT3	1	0	1	15	0	0	0	0	0	0	0
Scer_4.882	Spar_4.887	YDR515W	SLF1	5	6	3	0	1	0	0	0	0	0	0
Scer_4.884	Spar_4.889	YDR517W	GRH1	5	7	3	9	1	0	0	0	0	0	0
Scer_4.887	Spar_4.892	YDR520C	URC2	2	0	1	0	0	0	0	0	0	0	0
Scer_4.897	Spar_4.900	YDR529C	QCR7	0	0	0	6	0	0	0	0	0	0	0
Scer_4.899	Spar_4.902	YDR531W	CAB1	1	0	0	0	0	0	0	0	0	0	0
Scer_4.901	Spar_4.904	YDR533C	HSP31	1	0	0	0	0	0	0	0	0	0	0
Scer_4.98	Spar_4.104	YDL160C	DHH1	121	118	60	91	1	1	1	0	0	0	0
Scer_5.101	Spar_5.123	YER002W	NOP16	0	0	8	5	0	1	0	0	1	0	0
Scer_5.103	Spar_5.125	YER004W	FMP52	2	1	0	0	0	0	0	0	0	0	0
Scer_5.107	Spar_5.129	YER007W	PAC2	0	0	0	11	0	0	0	0	0	0	0
Scer_5.122	Spar_5.149	YER018C	SPC25	0	0	1	0	0	0	0	0	0	0	0
Scer_5.123	Spar_5.150	YER019W	ISC1	0	0	1	3	0	0	0	0	0	0	0
Scer_5.125	Spar_5.152	YER020W	GPA2	2	0	3	14	0	0	0	0	0	0	0
Scer_5.133	Spar_5.163	YER027C	GAL83	0	0	1	0	0	0	0	0	0	0	0
Scer_5.136	Spar_5.166	YER030W	CHZ1	4	0	0	0	0	0	0	0	0	0	0
Scer_5.137	Spar_5.167	YER031C	YPT31	3	0	0	0	0	0	0	0	0	0	0
Scer_5.141	Spar_5.171	YER035W	EDC2	0	0	4	10	0	0	0	0	0	0	0
Scer_5.142	Spar_5.172	YER036C	ARB1	1	0	0	9	0	0	0	0	0	0	0
Scer_5.147	Spar_5.176	YER040W	GLN3	0	0	1	0	0	0	0	0	0	0	0
Scer_5.148	Spar_5.177	YER041W	YEN1	0	11	0	0	0	0	0	0	0	0	0
Scer_5.151	Spar_5.180	YER044C	ERG28	2	0	0	0	0	0	0	0	0	0	0
Scer_5.156	Spar_5.185	YER048C	CAJ1	1	1	0	0	0	0	0	0	0	0	0
Scer_5.160	Spar_5.190	YER049W	TPA1	1	1	0	0	0	0	0	0	0	0	0
Scer_5.164	Spar_5.194	YER053C	PIC2	0	13	0	0	0	0	0	0	0	0	0
Scer_5.166	Spar_5.196	YER054C	GIP2	0	7	0	0	0	0	0	0	0	0	0
Scer_5.17	Spar_5.9	YEL065W	SIT1	0	0	1	0	0	0	0	0	0	0	0
Scer_5.170	Spar_5.200	YER057C	HMF1	0	8	2	12	0	0	0	0	0	0	0
Scer_5.172	Spar_5.202	YER059W	PCL6	26	3	12	18	0	1	0	0	0	0	0
Scer_5.177	Spar_5.208	YER063W	THO1	1	0	0	0	0	0	0	0	0	0	0
Scer_5.178	Spar_5.209	YER064C	VHR2	1	0	13	23	0	1	0	0	0	0	0
Scer_5.179	Spar_5.210	YER065C	ICL1	0	0	2	0	0	0	0	0	0	0	0
Scer_5.185	Spar_5.217	YER068W	MOT2	0	6	3	1	0	0	0	0	0	0	0
Scer_5.189	Spar_5.222	YER072W	VTC1	7	11	21	11	1	1	1	0	0	0	0
Scer_5.204	Spar_5.244	YER082C	UTP7	0	5	0	0	0	0	0	0	0	0	0
Scer_5.208	Spar_5.248	YER086W	ILV1	0	0	0	1	0	0	0	0	0	0	0
Scer_5.209	Spar_5.249	YER087W	AIM10	2	0	0	0	0	0	0	0	0	0	0
Scer_5.215	Spar_5.255	YER091C	MET6	1	0	0	0	0	0	0	0	0	0	0
Scer_5.220	Spar_5.262	YER094C	PUP3	6	27	18	22	1	1	1	0	0	0	0
Scer_5.221	Spar_5.263	YER095W	RAD51	4	0	0	1	0	0	0	0	0	0	0
Scer_5.228	Spar_5.272	YER099C	PRS2	2	0	2	1	0	0	0	0	0	0	0
Scer_5.229	Spar_5.273	YER100W	UBC6	11	5	3	14	1	0	0	0	0	0	0
Scer_5.244	Spar_5.286	YER114C	BOI2	27	27	11	16	1	1	1	0	0	0	0
Scer_5.245	Spar_5.287	YER115C	SPR6	26	7	2	7	1	0	0	0	0	0	0
Scer_5.246	Spar_5.288	YER116C	SLX8	0	0	1	19	0	0	0	0	0	0	0
Scer_5.248	Spar_5.290	YER118C	SHO1	16	52	7	16	1	1	1	0	0	0	0
Scer_5.253	Spar_5.295	YER122C	GLO3	4	12	10	0	0	0	0	0	0	0	0
Scer_5.254	Spar_5.296	YER123W	YCK3	21	15	21	13	1	1	1	0	0	0	0
Scer_5.255	Spar_5.297	YER124C	DSE1	0	0	0	12	0	0	0	0	0	0	0
Scer_5.260	Spar_5.302	YER129W	SAK1	6	0	3	8	0	0	0	0	0	0	0
Scer_5.266	Spar_5.306	YER133W	GLC7	1	3	6	1	0	0	0	0	0	0	0
Scer_5.275	Spar_5.325	YER136W	GDI1	9	20	4	4	1	0	0	0	0	0	0
Scer_5.296	Spar_5.334	YER143W	DDI1	0	22	0	0	0	0	0	0	0	0	0
Scer_5.298	Spar_5.336	YER145C	FTR1	0	0	1	0	0	0	0	0	0	0	0
Scer_5.300	Spar_5.338	YER147C	SCC4	0	0	8	0	0	0	0	0	0	0	0
Scer_5.302	Spar_5.340	YER149C	PEA2	1	0	0	0	0	0	0	0	0	0	0
Scer_5.32	Spar_5.24	YEL051W	VMA8	0	5	1	3	0	0	0	0	0	0	0
Scer_5.330	Spar_5.362	YER165W	PAB1	4	10	0	0	0	0	0	0	0	0	0
Scer_5.333	Spar_5.364	YER167W	BCK2	5	0	0	0	0	0	0	0	0	0	0
Scer_5.334	Spar_5.365	YER168C	CCA1	1	0	0	0	0	0	0	0	0	0	0
Scer_5.34	Spar_5.26	YEL050C	RML2	7	0	0	3	0	0	0	0	0	0	0
Scer_5.344	Spar_5.374	YER177W	BMH1	0	1	0	1	0	0	0	0	0	0	0
Scer_5.46	Spar_5.35	YEL042W	GDA1	5	5	72	36	1	1	1	0	0	0	0
Scer_5.49	Spar_5.38	YEL039C	CYC7	0	0	1	0	0	0	0	0	0	0	0
Scer_5.50	Spar_5.39	YEL038W	UTR4	2	0	0	8	0	0	0	0	0	0	0
Scer_5.51	Spar_5.40	YEL037C	RAD23	76	32	34	59	1	1	1	0	0	0	0
Scer_5.52	Spar_5.41	YEL036C	ANP1	3	10	45	10	0	1	0	0	0	0	0
Scer_5.57	Spar_5.47	YEL032W	MCM3	0	8	4	1	0	0	0	0	0	0	0
Scer_5.60	Spar_5.50	YEL029C	BUD16	0	0	5	0	0	0	0	0	0	0	0
Scer_5.67	Spar_5.58	YEL024W	RIP1	0	0	2	0	0	0	0	0	0	0	0
Scer_5.76	Spar_5.69	YEL017W	GTT3	0	0	2	0	0	0	0	0	0	0	0
Scer_5.77	Spar_5.70	YEL016C	NPP2	25	52	10	0	1	0	0	0	0	0	0
Scer_5.91	Spar_5.97	YEL009C	GCN4	417	823	809	448	1	1	1	0	0	0	0
Scer_5.96	Spar_5.118	YEL004W	YEA4	0	0	5	15	0	1	0	0	1	0	0
Scer_5.98	Spar_5.120	YEL002C	WBP1	0	0	0	4	0	0	0	0	0	0	0
Scer_6.101	Spar_6.96	YFR004W	RPN11	0	0	5	10	0	1	0	0	1	0	0
Scer_6.103	Spar_6.98	YFR006W	NA	0	0	6	3	0	0	0	0	0	0	0
Scer_6.113	Spar_6.108	YFR009W	GCN20	0	0	0	6	0	0	0	0	0	0	0
Scer_6.119	Spar_6.114	YFR014C	CMK1	0	6	1	0	0	0	0	0	0	0	0
Scer_6.121	Spar_6.117	YFR016C	NA	0	0	1	0	0	0	0	0	0	0	0
Scer_6.123	Spar_6.121	YFR017C	IGD1	0	0	1	0	0	0	0	0	0	0	0
Scer_6.142	Spar_6.138	YFR028C	CDC14	2	0	0	0	0	0	0	0	0	0	0
Scer_6.160	Spar_6.154	YFR039C	NA	8	1	20	10	0	1	0	0	0	0	0
Scer_6.168	Spar_6.162	YFR047C	BNA6	3	0	0	0	0	0	0	0	0	0	0
Scer_6.170	Spar_6.164	YFR049W	YMR31	35	10	40	7	1	1	1	0	0	0	0
Scer_6.171	Spar_6.165	YFR050C	PRE4	10	15	2	0	1	0	0	0	0	0	0
Scer_6.172	Spar_6.166	YFR051C	RET2	0	11	0	0	0	0	0	0	0	0	0
Scer_6.33	Spar_6.36	YFL045C	SEC53	59	44	69	161	1	1	1	0	0	0	0
Scer_6.42	Spar_6.43	YFL039C	ACT1	4	32	0	0	0	0	0	0	0	0	0
Scer_6.43	Spar_6.44	YFL038C	YPT1	8	2	9	4	0	0	0	0	0	0	0
Scer_6.44	Spar_6.45	YFL037W	TUB2	0	0	0	2	0	0	0	0	0	0	0
Scer_6.47	Spar_6.48	YFL034C-A	RPL22B	0	6	0	0	0	0	0	0	0	0	0
Scer_6.48	Spar_6.49	YFL034W	NA	2	2	1	5	0	0	0	0	0	0	0
Scer_6.49	Spar_6.50	YFL033C	RIM15	6	0	0	1	0	0	0	0	0	0	0
Scer_6.54	Spar_6.53	YFL029C	CAK1	0	0	0	5	0	0	0	0	0	0	0
Scer_6.59	Spar_6.58	YFL024C	EPL1	25	16	84	64	1	1	1	0	0	0	0
Scer_6.61	Spar_6.60	YFL022C	FRS2	5	6	0	20	1	0	0	0	0	0	0
Scer_6.67	Spar_6.71	YFL018C	LPD1	21	9	1	0	1	0	0	0	0	0	0
Scer_6.78	Spar_6.82	YFL009W	CDC4	6	6	13	7	1	1	1	0	0	0	0
Scer_6.81	Spar_6.85	YFL005W	SEC4	57	21	70	69	1	1	1	0	0	0	0
Scer_6.82	Spar_6.86	YFL004W	VTC2	3	7	11	3	0	0	0	0	0	0	0
Scer_6.98	Spar_6.93	YFR001W	LOC1	0	5	0	0	0	0	0	0	0	0	0
Scer_7.102	Spar_7.99	YGL179C	TOS3	5	0	0	0	0	0	0	0	0	0	0
Scer_7.105	Spar_7.101	YGL176C	NA	0	0	1	5	0	0	0	0	0	0	0
Scer_7.108	Spar_7.104	YGL173C	XRN1	67	95	57	31	1	1	1	0	0	0	0
Scer_7.116	Spar_7.113	YGL164C	YRB30	0	0	2	0	0	0	0	0	0	0	0
Scer_7.118	Spar_7.115	YGL162W	SUT1	2	10	3	8	0	0	0	0	0	0	0
Scer_7.126	Spar_7.123	YGL155W	CDC43	0	0	0	3	0	0	0	0	0	0	0
Scer_7.129	Spar_7.126	YGL151W	NUT1	1	0	0	0	0	0	0	0	0	0	0
Scer_7.139	Spar_7.138	YGL141W	HUL5	0	0	0	1	0	0	0	0	0	0	0
Scer_7.140	Spar_7.139	YGL140C	NA	0	3	1	17	0	0	0	0	0	0	0
Scer_7.144	Spar_7.143	YGL136C	MRM2	6	0	0	0	0	0	0	0	0	0	0
Scer_7.146	Spar_7.145	YGL134W	PCL10	2	7	10	14	0	1	0	0	0	0	0
Scer_7.147	Spar_7.146	YGL133W	ITC1	3	0	0	0	0	0	0	0	0	0	0
Scer_7.154	Spar_7.153	YGL125W	MET13	0	0	0	1	0	0	0	0	0	0	0
Scer_7.158	Spar_7.158	YGL121C	GPG1	1	0	0	0	0	0	0	0	0	0	0
Scer_7.165	Spar_7.170	YGL115W	SNF4	1	11	16	0	0	0	0	0	0	0	0
Scer_7.166	Spar_7.171	YGL114W	NA	0	0	0	2	0	0	0	0	0	0	0
Scer_7.174	Spar_7.179	YGL105W	ARC1	0	4	0	0	0	0	0	0	0	0	0
Scer_7.179	Spar_7.184	YGL099W	LSG1	13	5	3	1	1	0	0	0	0	0	0
Scer_7.180	Spar_7.185	YGL098W	USE1	19	24	24	44	1	1	1	0	0	0	0
Scer_7.189	Spar_7.196	YGL094C	PAN2	12	0	13	5	0	1	0	0	0	0	0
Scer_7.191	Spar_7.198	YGL092W	NUP145	3	0	1	0	0	0	0	0	0	0	0
Scer_7.192	Spar_7.199	YGL091C	NBP35	2	0	0	0	0	0	0	0	0	0	0
Scer_7.193	Spar_7.200	YGL090W	LIF1	5	0	1	12	0	0	0	0	0	0	0
Scer_7.20	Spar_7.18	YGL250W	RMR1	2	0	0	0	0	0	0	0	0	0	0
Scer_7.200	Spar_7.207	YGL083W	SCY1	0	0	1	0	0	0	0	0	0	0	0
Scer_7.203	Spar_7.210	YGL080W	FMP37	1	0	0	0	0	0	0	0	0	0	0
Scer_7.204	Spar_7.211	YGL079W	KXD1	8	0	2	0	0	0	0	0	0	0	0
Scer_7.210	Spar_7.219	YGL071W	AFT1	13	18	38	34	1	1	1	0	0	0	0
Scer_7.211	Spar_7.220	YGL070C	RPB9	0	0	4	0	0	0	0	0	0	0	0
Scer_7.212	Spar_7.221	YGL068W	MNP1	0	4	1	0	0	0	0	0	0	0	0
Scer_7.222	Spar_7.231	YGL058W	RAD6	0	5	0	0	0	0	0	0	0	0	0
Scer_7.224	Spar_7.233	YGL056C	SDS23	1	8	1	0	0	0	0	0	0	0	0
Scer_7.227	Spar_7.235	YGL054C	ERV14	10	26	0	10	1	0	0	0	0	0	0
Scer_7.24	Spar_7.22	YGL246C	RAI1	6	0	0	6	0	0	0	0	0	0	0
Scer_7.253	Spar_7.261	YGL038C	OCH1	0	0	7	0	0	0	0	0	0	0	0
Scer_7.254	Spar_7.262	YGL037C	PNC1	0	0	4	0	0	0	0	0	0	0	0
Scer_7.26	Spar_7.24	YGL244W	RTF1	0	1	0	0	0	0	0	0	0	0	0
Scer_7.260	Spar_7.268	YGL031C	RPL24A	0	7	15	38	0	1	0	0	0	0	0
Scer_7.262	Spar_7.270	YGL029W	CGR1	0	0	0	11	0	0	0	0	0	0	0
Scer_7.265	Spar_7.273	YGL027C	CWH41	1	0	0	0	0	0	0	0	0	0	0
Scer_7.269	Spar_7.278	YGL022W	STT3	3	13	0	0	0	0	0	0	0	0	0
Scer_7.271	Spar_7.280	YGL020C	GET1	0	0	1	0	0	0	0	0	0	0	0
Scer_7.277	Spar_7.286	YGL014W	PUF4	62	77	132	124	1	1	1	0	0	0	0
Scer_7.278	Spar_7.287	YGL013C	PDR1	0	0	0	7	0	0	0	0	0	0	0
Scer_7.281	Spar_7.290	YGL010W	NA	0	0	2	0	0	0	0	0	0	0	0
Scer_7.307	Spar_7.315	YGR017W	NA	12	5	6	3	1	0	0	0	0	0	0
Scer_7.309	Spar_7.317	YGR020C	VMA7	5	13	7	0	1	0	0	0	0	0	0
Scer_7.317	Spar_7.329	YGR027C	RPS25A	21	52	31	36	1	1	1	0	0	0	0
Scer_7.335	Spar_7.338	YGR031W	IMO32	1	0	2	4	0	0	0	0	0	0	0
Scer_7.337	Spar_7.340	YGR033C	TIM21	4	2	2	0	0	0	0	0	0	0	0
Scer_7.339	Spar_7.342	YGR035C	NA	0	22	4	0	0	0	0	0	0	0	0
Scer_7.343	Spar_7.346	YGR038W	ORM1	12	20	20	19	1	1	1	0	0	0	0
Scer_7.376	Spar_7.365	YGR053C	NA	3	0	0	2	0	0	0	0	0	0	0
Scer_7.377	Spar_7.366	YGR054W	NA	19	34	22	7	1	1	1	0	0	0	0
Scer_7.380	Spar_7.369	YGR057C	LST7	12	0	13	1	0	0	0	0	0	0	0
Scer_7.383	Spar_7.372	YGR060W	ERG25	3	4	7	24	0	1	0	0	0	0	0
Scer_7.384	Spar_7.373	YGR061C	ADE6	0	9	11	0	0	0	0	0	0	0	0
Scer_7.387	Spar_7.377	YGR065C	VHT1	10	0	3	0	0	0	0	0	0	0	0
Scer_7.39	Spar_7.37	YGL229C	SAP4	3	0	6	0	0	0	0	0	0	0	0
Scer_7.395	Spar_7.384	YGR072W	UPF3	0	0	0	13	0	0	0	0	0	0	0
Scer_7.404	Spar_7.393	YGR082W	TOM20	5	4	0	0	0	0	0	0	0	0	0
Scer_7.405	Spar_7.394	YGR083C	GCD2	6	0	0	0	0	0	0	0	0	0	0
Scer_7.413	Spar_7.404	YGR090W	UTP22	19	28	1	0	1	0	0	0	0	0	0
Scer_7.422	Spar_7.413	YGR099W	TEL2	0	2	0	0	0	0	0	0	0	0	0
Scer_7.423	Spar_7.414	YGR100W	MDR1	2	0	22	7	0	1	0	0	0	0	0
Scer_7.429	Spar_7.420	YGR106C	VOA1	0	10	0	0	0	0	0	0	0	0	0
Scer_7.435	Spar_7.428	YGR108W	CLB1	7	6	3	6	1	0	0	0	0	0	0
Scer_7.449	Spar_7.441	YGR119C	NUP57	1	1	1	0	0	0	0	0	0	0	0
Scer_7.468	Spar_7.460	YGR132C	PHB1	0	1	0	0	0	0	0	0	0	0	0
Scer_7.47	Spar_7.44	YGL225W	VRG4	0	6	0	0	0	0	0	0	0	0	0
Scer_7.471	Spar_7.463	YGR135W	PRE9	0	0	2	0	0	0	0	0	0	0	0
Scer_7.48	Spar_7.45	YGL224C	SDT1	11	12	28	14	1	1	1	0	0	0	0
Scer_7.490	Spar_7.481	YGR147C	NAT2	0	16	0	2	0	0	0	0	0	0	0
Scer_7.501	Spar_7.494	YGR156W	PTI1	2	0	1	4	0	0	0	0	0	0	0
Scer_7.502	Spar_7.495	YGR157W	CHO2	29	34	30	22	1	1	1	0	0	0	0
Scer_7.503	Spar_7.496	YGR158C	MTR3	0	0	0	1	0	0	0	0	0	0	0
Scer_7.505	Spar_7.498	YGR161C	RTS3	0	0	0	3	0	0	0	0	0	0	0
Scer_7.528	Spar_7.512	YGR165W	MRPS35	1	0	0	15	0	0	0	0	0	0	0
Scer_7.530	Spar_7.514	YGR167W	CLC1	3	22	0	1	0	0	0	0	0	0	0
Scer_7.531	Spar_7.515	YGR168C	NA	10	6	1	22	1	0	0	0	0	0	0
Scer_7.532	Spar_7.516	YGR169C	PUS6	1	12	0	9	0	0	0	0	0	0	0
Scer_7.535	Spar_7.519	YGR171C	MSM1	0	1	0	0	0	0	0	0	0	0	0
Scer_7.536	Spar_7.520	YGR172C	YIP1	0	0	0	3	0	0	0	0	0	0	0
Scer_7.540	Spar_7.527	YGR175C	ERG1	4	11	2	0	0	0	0	0	0	0	0
Scer_7.544	Spar_7.532	YGR180C	RNR4	69	97	34	166	1	1	1	0	0	0	0
Scer_7.546	Spar_7.535	YGR181W	TIM13	1	0	0	0	0	0	0	0	0	0	0
Scer_7.549	Spar_7.538	YGR184C	UBR1	9	21	18	19	1	1	1	0	0	0	0
Scer_7.55	Spar_7.52	YGL215W	CLG1	0	11	5	0	0	0	0	0	0	0	0
Scer_7.557	Spar_7.545	YGR189C	CRH1	0	11	0	0	0	0	0	0	0	0	0
Scer_7.559	Spar_7.548	YGR191W	HIP1	23	42	18	10	1	1	1	0	0	0	0
Scer_7.568	Spar_7.557	YGR200C	ELP2	0	0	2	0	0	0	0	0	0	0	0
Scer_7.571	Spar_7.560	YGR203W	YCH1	18	16	0	2	1	0	0	0	0	0	0
Scer_7.574	Spar_7.562	YGR205W	TDA10	4	10	0	0	0	0	0	0	0	0	0
Scer_7.576	Spar_7.564	YGR207C	CIR1	0	0	6	3	0	0	0	0	0	0	0
Scer_7.579	Spar_7.567	YGR210C	NA	13	0	0	14	0	0	0	0	0	0	0
Scer_7.580	Spar_7.568	YGR211W	ZPR1	0	1	1	4	0	0	0	0	0	0	0
Scer_7.594	Spar_7.581	YGR221C	TOS2	2	0	1	0	0	0	0	0	0	0	0
Scer_7.60	Spar_7.57	YGL209W	MIG2	13	47	7	28	1	1	1	0	0	0	0
Scer_7.601	Spar_7.588	YGR229C	SMI1	49	69	37	64	1	1	1	0	0	0	0
Scer_7.602	Spar_7.589	YGR230W	BNS1	0	0	0	11	0	0	0	0	0	0	0
Scer_7.617	Spar_7.605	YGR245C	SDA1	3	0	0	22	0	0	0	0	0	0	0
Scer_7.618	Spar_7.606	YGR246C	BRF1	0	7	0	0	0	0	0	0	0	0	0
Scer_7.619	Spar_7.607	YGR247W	CPD1	2	6	2	0	0	0	0	0	0	0	0
Scer_7.621	Spar_7.610	YGR249W	MGA1	1	0	4	0	0	0	0	0	0	0	0
Scer_7.622	Spar_7.611	YGR250C	NA	1	0	7	0	0	0	0	0	0	0	0
Scer_7.625	Spar_7.614	YGR253C	PUP2	0	16	0	0	0	0	0	0	0	0	0
Scer_7.630	Spar_7.619	YGR257C	MTM1	6	0	3	0	0	0	0	0	0	0	0
Scer_7.631	Spar_7.620	YGR258C	RAD2	0	0	4	18	0	0	0	0	0	0	0
Scer_7.637	Spar_7.629	YGR266W	NA	2	0	0	0	0	0	0	0	0	0	0
Scer_7.638	Spar_7.630	YGR267C	FOL2	40	22	27	25	1	1	1	0	0	0	0
Scer_7.641	Spar_7.633	YGR270W	YTA7	10	11	1	5	1	0	0	0	0	0	0
Scer_7.652	Spar_7.636	YGR281W	YOR1	3	3	0	0	0	0	0	0	0	0	0
Scer_7.653	Spar_7.637	YGR282C	BGL2	0	0	0	12	0	0	0	0	0	0	0
Scer_7.82	Spar_7.80	YGL197W	MDS3	3	1	12	2	0	0	0	0	0	0	0
Scer_7.94	Spar_7.91	YGL187C	COX4	3	22	2	15	0	0	0	0	0	0	0
Scer_8.105	Spar_8.86	YHR019C	DED81	2	0	4	9	0	0	0	0	0	0	0
Scer_8.106	Spar_8.87	YHR020W	NA	33	15	9	0	1	0	0	0	0	0	0
Scer_8.115	Spar_8.98	YHR026W	VMA16	4	16	4	9	0	0	0	0	0	0	0
Scer_8.116	Spar_8.99	YHR027C	RPN1	1	0	0	0	0	0	0	0	0	0	0
Scer_8.120	Spar_8.103	YHR030C	SLT2	14	24	3	4	1	0	0	0	0	0	0
Scer_8.135	Spar_8.118	YHR043C	DOG2	10	0	2	0	0	0	0	0	0	0	0
Scer_8.137	Spar_8.120	YHR045W	NA	1	11	6	3	0	0	0	0	0	0	0
Scer_8.148	Spar_8.130	YHR051W	COX6	0	0	6	9	0	1	0	0	1	0	0
Scer_8.154	Spar_8.134	YHR057C	CPR2	7	2	2	0	0	0	0	0	0	0	0
Scer_8.161	Spar_8.141	YHR064C	SSZ1	5	0	11	0	0	0	0	0	0	0	0
Scer_8.163	Spar_8.143	YHR066W	SSF1	7	0	0	0	0	0	0	0	0	0	0
Scer_8.165	Spar_8.145	YHR068W	DYS1	0	13	0	7	0	0	0	0	0	0	0
Scer_8.168	Spar_8.149	YHR071W	PCL5	13	15	0	0	1	0	0	1	0	0	0
Scer_8.171	Spar_8.152	YHR072W	ERG7	22	10	5	0	1	0	0	0	0	0	0
Scer_8.175	Spar_8.155	YHR074W	QNS1	1	0	0	0	0	0	0	0	0	0	0
Scer_8.179	Spar_8.159	YHR078W	NA	0	0	1	0	0	0	0	0	0	0	0
Scer_8.183	Spar_8.163	YHR081W	LRP1	0	11	1	0	0	0	0	0	0	0	0
Scer_8.186	Spar_8.166	YHR084W	STE12	3	0	4	0	0	0	0	0	0	0	0
Scer_8.188	Spar_8.168	YHR086W	NAM8	3	17	1	0	0	0	0	0	0	0	0
Scer_8.190	Spar_8.170	YHR087W	RTC3	2	6	0	0	0	0	0	0	0	0	0
Scer_8.192	Spar_8.172	YHR089C	GAR1	8	2	0	21	0	0	0	0	0	0	0
Scer_8.201	Spar_8.182	YHR098C	SFB3	2	0	0	0	0	0	0	0	0	0	0
Scer_8.210	Spar_8.191	YHR107C	CDC12	5	0	0	0	0	0	0	0	0	0	0
Scer_8.215	Spar_8.196	YHR112C	NA	1	0	0	0	0	0	0	0	0	0	0
Scer_8.217	Spar_8.198	YHR114W	BZZ1	24	6	11	0	1	0	0	0	0	0	0
Scer_8.218	Spar_8.199	YHR115C	DMA1	8	61	5	7	1	1	1	0	0	0	0
Scer_8.233	Spar_8.218	YHR128W	FUR1	0	1	1	0	0	0	0	0	0	0	0
Scer_8.234	Spar_8.219	YHR129C	ARP1	7	8	2	0	1	0	0	0	0	0	0
Scer_8.240	Spar_8.225	YHR133C	NSG1	0	1	0	0	0	0	0	0	0	0	0
Scer_8.264	Spar_8.249	YHR152W	SPO12	1	0	0	0	0	0	0	0	0	0	0
Scer_8.273	Spar_8.258	YHR161C	YAP1801	4	4	5	2	0	0	0	0	0	0	0
Scer_8.274	Spar_8.259	YHR162W	MPC2	37	41	71	33	1	1	1	0	0	0	0
Scer_8.278	Spar_8.263	YHR166C	CDC23	0	0	3	0	0	0	0	0	0	0	0
Scer_8.28	Spar_8.19	YHL034C	SBP1	0	11	9	8	0	1	0	0	0	0	0
Scer_8.282	Spar_8.267	YHR170W	NMD3	1	6	0	0	0	0	0	0	0	0	0
Scer_8.303	Spar_8.294	YHR186C	KOG1	7	0	1	0	0	0	0	0	0	0	0
Scer_8.305	Spar_8.296	YHR188C	GPI16	0	0	113	1	0	0	0	0	0	0	0
Scer_8.307	Spar_8.298	YHR190W	ERG9	0	8	0	0	0	0	0	0	0	0	0
Scer_8.312	Spar_8.303	YHR195W	NVJ1	0	1	5	10	0	1	0	0	0	0	0
Scer_8.325	Spar_8.315	YHR206W	SKN7	24	35	38	3	1	0	0	0	0	0	0
Scer_8.35	Spar_8.26	YHL027W	RIM101	0	0	0	1	0	0	0	0	0	0	0
Scer_8.36	Spar_8.27	YHL026C	NA	10	10	6	0	1	0	0	0	0	0	0
Scer_8.42	Spar_8.33	YHL021C	AIM17	2	10	0	0	0	0	0	0	0	0	0
Scer_8.43	Spar_8.34	YHL020C	OPI1	4	1	1	0	0	0	0	0	0	0	0
Scer_8.46	Spar_8.37	YHL017W	NA	0	5	0	0	0	0	0	0	0	0	0
Scer_8.53	Spar_8.43	YHL011C	PRS3	34	42	9	16	1	1	1	0	0	0	0
Scer_8.55	Spar_8.45	YHL009C	YAP3	0	1	0	0	0	0	0	0	0	0	0
Scer_8.67	Spar_8.48	YHL008C	NA	1	0	0	0	0	0	0	0	0	0	0
Scer_8.71	Spar_8.52	YHL004W	MRP4	0	2	0	0	0	0	0	0	0	0	0
Scer_8.79	Spar_8.59	YHR004C	NEM1	0	0	3	4	0	0	0	0	0	0	0
Scer_8.86	Spar_8.64	YHR007C	ERG11	84	24	112	78	1	1	1	0	0	0	0
Scer_8.88	Spar_8.66	YHR008C	SOD2	15	30	2	2	1	0	0	0	0	0	0
Scer_8.89	Spar_8.67	YHR009C	TDA3	7	7	4	0	1	0	0	0	0	0	0
Scer_8.91	Spar_8.70	YHR011W	DIA4	0	0	0	3	0	0	0	0	0	0	0
Scer_8.93	Spar_8.72	YHR013C	ARD1	0	9	0	5	0	0	0	0	0	0	0
Scer_9.101	Spar_9.90	YIL090W	ICE2	6	1	29	11	0	1	0	0	0	0	0
Scer_9.113	Spar_9.99	YIL083C	CAB2	0	12	0	0	0	0	0	0	0	0	0
Scer_9.128	Spar_9.112	YIL070C	MAM33	0	0	0	4	0	0	0	0	0	0	0
Scer_9.147	Spar_9.128	YIL053W	RHR2	10	12	0	0	1	0	0	1	0	0	0
Scer_9.151	Spar_9.130	YIL051C	MMF1	0	3	0	1	0	0	0	0	0	0	0
Scer_9.152	Spar_9.131	YIL050W	PCL7	8	18	4	14	1	0	0	0	0	0	0
Scer_9.154	Spar_9.133	YIL048W	NEO1	4	30	10	1	0	0	0	0	0	0	0
Scer_9.158	Spar_9.136	YIL045W	PIG2	2	0	1	0	0	0	0	0	0	0	0
Scer_9.164	Spar_9.142	YIL039W	TED1	9	5	11	15	1	1	1	0	0	0	0
Scer_9.165	Spar_9.143	YIL038C	NOT3	23	17	62	13	1	1	1	0	0	0	0
Scer_9.179	Spar_9.161	YIL027C	EMC5	0	0	2	1	0	0	0	0	0	0	0
Scer_9.184	Spar_9.166	YIL022W	TIM44	27	23	9	24	1	1	1	0	0	0	0
Scer_9.190	Spar_9.172	YIL017C	VID28	2	0	3	6	0	0	0	0	0	0	0
Scer_9.204	Spar_9.185	YIL010W	DOT5	0	0	0	3	0	0	0	0	0	0	0
Scer_9.208	Spar_9.191	YIL008W	URM1	0	0	1	6	0	0	0	0	0	0	0
Scer_9.211	Spar_9.194	YIL005W	EPS1	12	14	2	0	1	0	0	0	0	0	0
Scer_9.213	Spar_9.196	YIL003W	CFD1	7	0	1	0	0	0	0	0	0	0	0
Scer_9.217	Spar_9.200	YIR001C	SGN1	0	0	1	0	0	0	0	0	0	0	0
Scer_9.218	Spar_9.201	YIR002C	MPH1	0	0	0	1	0	0	0	0	0	0	0
Scer_9.226	Spar_9.210	YIR009W	MSL1	0	11	0	3	0	0	0	0	0	0	0
Scer_9.230	Spar_9.214	YIR013C	GAT4	0	0	2	15	0	0	0	0	0	0	0
Scer_9.235	Spar_9.219	YIR018W	YAP5	0	0	1	0	0	0	0	0	0	0	0
Scer_9.257	Spar_9.244	YIR037W	HYR1	59	30	9	7	1	1	1	0	0	0	0
Scer_9.46	Spar_9.33	YIL139C	REV7	0	11	6	12	0	1	0	0	0	0	0
Scer_9.48	Spar_9.35	YIL137C	TMA108	5	0	0	0	0	0	0	0	0	0	0
Scer_9.50	Spar_9.37	YIL135C	VHS2	3	4	0	0	0	0	0	0	0	0	0
Scer_9.56	Spar_9.43	YIL130W	ASG1	0	0	8	19	0	1	0	0	1	0	0
Scer_9.57	Spar_9.44	YIL129C	TAO3	0	0	0	4	0	0	0	0	0	0	0
Scer_9.61	Spar_9.48	YIL125W	KGD1	0	0	10	2	0	0	0	0	0	0	0
Scer_9.62	Spar_9.49	YIL124W	AYR1	0	4	2	0	0	0	0	0	0	0	0
Scer_9.69	Spar_9.56	YIL118W	RHO3	3	0	1	1	0	0	0	0	0	0	0
Scer_9.72	Spar_9.59	YIL115C	NUP159	3	9	13	0	0	0	0	0	0	0	0
Scer_9.77	Spar_9.64	YIL110W	HPM1	0	1	0	12	0	0	0	0	0	0	0
Scer_9.96	Spar_9.85	YIL095W	PRK1	2	10	6	3	0	0	0	0	0	0	0
Scer_9.97	Spar_9.86	YIL094C	LYS12	12	1	0	0	0	0	0	0	0	0	0
